# Supplementary material for: Aging and Environmental Exposures Alter Tissue-Specific DNA Methylation Dependent upon CpG Island Context
Source: PLoS Genet. 2009 Aug 14;5(8):e1000602. doi: 10.1371/journal.pgen.1000602 (PMC2718614; doi:10.1371/journal.pgen.1000602)
Supplement: Table S1 — Autosomal CpG locus mean (sd) of average beta and values for the decrease in random forest classification accuracy with locus removal, all tissues. (0.68 MB XLS) [file pgen.1000602.s003.xls]

## Sheet: sheet1
Table S1. Autosomal CpG locus mean (sd) of average beta and values for the decrease in random forest classification accuracy with locus removal, all tissues.
			Bladder (n=5)		Blood (n=30)		Brain (n=12)		Cervix (n=3)		Infant blood (n=55)		Head and neck (n=11)		Kidney (n=6)		Placenta (n=19)		Pleura (n=18)		Small intestine (n=5)		Lung (n=53)
GENE	CpG	Mean decrease in accuracy	Mean (sd)	Decrease in accuracy	Mean (sd)	Decrease in accuracy	Mean (sd)	Decrease in accuracy	Mean (sd)	Decrease in accuracy	Mean (sd)	Decrease in accuracy	Mean (sd)	Decrease in accuracy	Mean (sd)	Decrease in accuracy	Mean (sd)	Decrease in accuracy	Mean (sd)	Decrease in accuracy	Mean (sd)	Decrease in accuracy	Mean (sd)	Decrease in accuracy
AATK	E63	0.00039208	0.93 (0.02)	3.91667e-05	0.96 (0.01)	0.000165919	0.88 (0.09)	8.09278e-05	0.63 (0.23)	0.000523	0.95 (0.01)	2.3545e-05	0.73 (0.17)	0.00174675	0.93 (0.02)	0.0001263	0.86 (0.05)	0.00136477	0.95 (0.03)	-1.54702e-05	0.95 (0.02)	-6e-06	0.95 (0.01)	0.000560243
AATK	P519	0.00423971	0.77 (0.08)	0.0054965	0.96 (0.01)	0.00271405	0.76 (0.09)	0.00774889	0.68 (0.1)	0.002128	0.88 (0.03)	0.000321588	0.6 (0.16)	0.00922329	0.77 (0.07)	0.0037865	0.68 (0.09)	0.00988227	0.86 (0.04)	0.00118602	0.89 (0.03)	0.001148	0.9 (0.03)	0.0066162
AATK	P709	0.00233364	0.49 (0.12)	0.00428367	0.91 (0.03)	0.000850883	0.74 (0.1)	9.18795e-05	0.19 (0.19)	0.001712	0.8 (0.07)	7.52704e-05	0.44 (0.15)	0.00740993	0.6 (0.11)	0.00199283	0.36 (0.11)	0.00645104	0.74 (0.06)	8.51516e-06	0.7 (0.11)	0.000272167	0.79 (0.04)	0.0043666
ABCA1	E120	7.47286e-05	0.03 (0.01)	1.61667e-05	0.02 (0)	0.0001881	0.02 (0)	0.000106919	0.03 (0.01)	6e-06	0.02 (0)	1.78546e-05	0.02 (0)	0.000102248	0.03 (0.01)	8.12333e-05	0.04 (0.02)	5.67509e-05	0.03 (0.01)	1.04458e-05	0.03 (0.01)	-3.2e-05	0.03 (0)	0.000102494
ABCA1	P45	0.000143269	0.05 (0.02)	-3.11667e-05	0.02 (0.01)	7.99926e-05	0.02 (0.01)	0.000230476	0.03 (0)	2.6e-05	0.04 (0.02)	1.40747e-05	0.03 (0.01)	9.88595e-05	0.07 (0.04)	0.0002285	0.1 (0.1)	3.10995e-05	0.05 (0.02)	-7.15132e-05	0.04 (0.01)	1.33333e-05	0.04 (0.01)	0.000443607
ABCB4	E429	0.00126158	0.94 (0.02)	0.000285833	0.96 (0.01)	9.26294e-05	0.96 (0.01)	0.000823467	0.95 (0.02)	-2.2e-05	0.95 (0.01)	2.72428e-05	0.94 (0.01)	0.00083343	0.94 (0.01)	0.000666967	0.85 (0.05)	0.0114821	0.96 (0.01)	0.00045156	0.96 (0.01)	0.000202667	0.95 (0.01)	0.000584387
ABCB4	P51	0.00122766	0.94 (0.02)	0.000112333	0.95 (0.01)	5.95856e-05	0.96 (0.01)	0.000847707	0.94 (0.01)	7.3e-05	0.94 (0.02)	2.13388e-05	0.93 (0.01)	0.000806042	0.93 (0.01)	0.000469733	0.78 (0.1)	0.0111949	0.95 (0.01)	0.000515547	0.95 (0)	0.000299833	0.95 (0.01)	0.000540682
ABCB4	P892	1.32281e-05	0.74 (0.32)	7.11667e-05	0.94 (0.02)	5.01065e-05	0.9 (0.14)	4.18532e-05	0.84 (0.07)	1.8e-05	0.9 (0.11)	-7.92665e-08	0.89 (0.02)	1.97389e-05	0.77 (0.27)	-1.49e-05	0.83 (0.19)	4.07864e-06	0.9 (0.03)	1.89719e-05	0.9 (0.03)	-3.91667e-05	0.9 (0.03)	3.76518e-06
ABCC2	E16	0.000968892	0.84 (0.03)	8.23333e-05	0.96 (0.01)	0.0036095	0.94 (0.05)	0.000458267	0.88 (0.05)	-3e-05	0.78 (0.18)	0.00107342	0.84 (0.24)	0.000197223	0.71 (0.15)	0.0001292	0.55 (0.14)	0.000689602	0.81 (0.06)	2.72605e-05	0.79 (0.08)	3.93333e-05	0.85 (0.05)	0.000430126
ABCC2	P88	0.000721428	0.94 (0.02)	0.000259833	0.96 (0)	0.000248762	0.95 (0.01)	0.000350179	0.95 (0)	0.000137	0.94 (0.02)	4.13441e-05	0.94 (0.01)	0.000867027	0.82 (0.06)	0.00398153	0.68 (0.09)	0.00376858	0.96 (0.01)	0.000446496	0.9 (0.07)	0.000115667	0.96 (0.01)	0.00062241
ABCC5	P444	2.2444e-05	0.04 (0.02)	7.83333e-06	0.03 (0.01)	2.90998e-06	0.03 (0.01)	6.38349e-05	0.03 (0)	0.000106	0.03 (0.01)	7.47742e-06	0.05 (0.02)	0.000192961	0.04 (0.01)	5.7e-06	0.04 (0.02)	-1.49935e-06	0.04 (0.01)	1.75784e-05	0.03 (0.01)	-1.5e-05	0.04 (0.01)	2.15586e-05
ABCG2	P178	0.000461368	0.12 (0.01)	0.000179833	0.04 (0.01)	0.000517086	0.05 (0.03)	0.000518277	0.07 (0.04)	-6.9e-05	0.08 (0.02)	5.78641e-05	0.06 (0.01)	0.0016209	0.11 (0.02)	0.000348933	0.14 (0.04)	0.00015935	0.13 (0.03)	0.000989004	0.11 (0.02)	0.000206	0.11 (0.02)	0.000634744
ABCG2	P310	3.23748e-06	0.04 (0.02)	5.41667e-05	0.02 (0)	4.72449e-06	0.04 (0.03)	2.83571e-06	0.03 (0.01)	1.1e-05	0.02 (0.01)	1.33495e-06	0.03 (0.01)	2.17595e-05	0.03 (0.01)	-6.66667e-07	0.02 (0.01)	4.79615e-06	0.07 (0.11)	-1.32111e-06	0.03 (0)	3.21667e-05	0.03 (0.01)	-3.10642e-06
ABL1	P53	2.74031e-05	0.1 (0.07)	-6.33333e-05	0.06 (0.03)	2.11645e-06	0.05 (0.03)	4.2454e-05	0.04 (0.01)	8.8e-05	0.09 (0.04)	-6.73991e-07	0.08 (0.05)	-1.69929e-05	0.09 (0.03)	-2.32667e-05	0.1 (0.05)	1.55767e-06	0.13 (0.05)	8.15223e-05	0.1 (0.01)	0.000115333	0.1 (0.03)	7.12293e-05
ABL2	P459	0.000433252	0.29 (0.06)	0.000115333	0.12 (0.03)	0.00018541	0.12 (0.11)	0.000349852	0.07 (0.03)	0.00033	0.14 (0.05)	0.000107346	0.12 (0.03)	0.000834555	0.26 (0.08)	7.96667e-05	0.27 (0.09)	2.12342e-05	0.33 (0.09)	0.000219301	0.32 (0.06)	0.00012	0.33 (0.07)	0.00116495
ABO	E110	0.000273418	0.16 (0.05)	0.000228333	0.04 (0.01)	0.000146861	0.05 (0.03)	0.000248076	0.2 (0.1)	0.000172	0.06 (0.02)	8.72378e-05	0.05 (0.01)	0.000989617	0.1 (0.04)	-5.04e-05	0.28 (0.14)	0.000177255	0.16 (0.05)	7.46171e-05	0.12 (0.01)	0.000190833	0.14 (0.05)	0.000549742
ABO	P312	8.28671e-05	0.1 (0.02)	-6.1e-05	0.05 (0.01)	0.000254257	0.06 (0.02)	0.000137111	0.1 (0.03)	-4.3e-05	0.08 (0.03)	7.1573e-06	0.08 (0.03)	-5.42937e-06	0.11 (0.02)	2.86e-05	0.23 (0.16)	2.94278e-05	0.13 (0.07)	7.71613e-05	0.1 (0.02)	-5.18333e-05	0.11 (0.03)	0.000127817
ACTG2	E98	0.000134924	0.66 (0.15)	0.0012525	0.94 (0.01)	0.000424351	0.84 (0.06)	0.000108395	0.86 (0.08)	-5.3e-05	0.91 (0.03)	4.26412e-06	0.82 (0.05)	0.00023719	0.89 (0.02)	7.24e-05	0.87 (0.04)	2.06043e-05	0.89 (0.04)	2.81895e-05	0.83 (0.05)	0.000115167	0.87 (0.03)	9.37789e-05
ACTG2	P346	0.000291286	0.59 (0.17)	0.000654333	0.92 (0.02)	0.00127623	0.86 (0.05)	1.94104e-05	0.84 (0.06)	-2e-05	0.8 (0.04)	0.000193581	0.82 (0.06)	-2.98048e-05	0.79 (0.08)	5.8e-05	0.73 (0.06)	8.91478e-05	0.74 (0.04)	0.000234388	0.76 (0.05)	2.08333e-05	0.76 (0.05)	8.36252e-05
ACTG2	P455	0.000558125	0.84 (0.09)	0.000941333	0.97 (0)	0.00256792	0.95 (0.01)	0.000100654	0.9 (0.08)	-5e-05	0.93 (0.02)	0.000579865	0.95 (0.01)	0.000104394	0.93 (0.02)	7.10333e-05	0.96 (0.02)	5.71503e-06	0.95 (0.01)	3.13251e-05	0.93 (0.04)	-0.000100833	0.95 (0.01)	8.72929e-05
ACVR1	E328	0.000476865	0.53 (0.12)	0.0005445	0.86 (0.05)	3.77401e-05	0.53 (0.14)	0.000968003	0.49 (0.42)	2.1e-05	0.92 (0.02)	0.000743641	0.8 (0.1)	0.00011713	0.5 (0.12)	0.0007245	0.9 (0.03)	0.000421134	0.75 (0.07)	0.000197061	0.66 (0.16)	0.0001415	0.73 (0.08)	0.000564371
ACVR1	P983	0.0019062	0.83 (0.03)	0.000414333	0.96 (0.01)	0.00883782	0.82 (0.07)	0.00101258	0.59 (0.28)	0.00023	0.93 (0.02)	0.000432297	0.84 (0.09)	0.000918402	0.65 (0.11)	0.00279363	0.82 (0.04)	0.00112945	0.88 (0.03)	0.000507429	0.88 (0.01)	0.000423833	0.88 (0.03)	0.00107512
ACVR1B	E497	5.02967e-05	0.04 (0.01)	-1.46667e-05	0.02 (0.01)	5.02212e-05	0.02 (0.01)	0.000135177	0.03 (0.01)	2.3e-05	0.03 (0.02)	8.42915e-06	0.03 (0.01)	-2.6169e-05	0.04 (0.01)	-1.13e-05	0.11 (0.07)	2.9873e-05	0.05 (0.01)	1.48554e-05	0.04 (0.02)	-4.81667e-05	0.05 (0.02)	0.000127508
ACVR1B	P572	0.000337273	0.16 (0.1)	-9.13333e-05	0.1 (0.04)	0.000411079	0.1 (0.09)	0.000130001	0.14 (0.03)	5e-06	0.28 (0.08)	0.00038791	0.07 (0.03)	0.00149941	0.15 (0.03)	8.27667e-05	0.25 (0.13)	1.51017e-05	0.22 (0.08)	8.88244e-05	0.2 (0.09)	3.2e-05	0.2 (0.11)	0.000365349
ACVR1C	P115	0.000946673	0.12 (0.03)	0.000121333	0.03 (0.01)	0.00166748	0.04 (0.03)	0.00129351	0.11 (0.09)	-0.00034	0.09 (0.03)	0.000409356	0.04 (0.01)	0.00295786	0.07 (0.02)	0.0006913	0.24 (0.07)	0.000532342	0.16 (0.03)	0.0014195	0.12 (0.03)	0.0002325	0.12 (0.04)	0.000867191
ACVR1C	P363	0.000188066	0.21 (0.04)	0.0003465	0.06 (0.03)	9.80154e-05	0.33 (0.13)	0.0010504	0.37 (0.03)	0.000477	0.13 (0.05)	5.85066e-06	0.12 (0.05)	7.03825e-05	0.19 (0.05)	-0.000122233	0.13 (0.07)	-8.39105e-07	0.17 (0.03)	0.000443742	0.16 (0.04)	-0.0001545	0.14 (0.03)	0.00027797
ACVR2B	E27	0.000156314	0.04 (0.02)	-2.7e-05	0.02 (0.01)	7.0479e-05	0.02 (0.01)	0.000597814	0.04 (0)	5.7e-05	0.03 (0.01)	2.6098e-05	0.03 (0.01)	0.000105686	0.05 (0.01)	0.000151267	0.05 (0.02)	1.86634e-05	0.05 (0.02)	-6.0651e-05	0.04 (0.01)	-3.51667e-05	0.04 (0.01)	0.000408331
ACVR2B	P676	2.54291e-05	0.12 (0.06)	-3.63333e-05	0.07 (0.02)	2.63672e-05	0.09 (0.04)	-5.11746e-06	0.12 (0.15)	-2.7e-05	0.12 (0.05)	-1.88726e-06	0.09 (0.02)	3.07825e-05	0.12 (0.03)	-1.04667e-05	0.19 (0.09)	1.81571e-05	0.14 (0.05)	4.6366e-05	0.12 (0.03)	-3.21667e-05	0.11 (0.03)	7.03619e-05
ADAMTS12	E52	0.000902883	0.28 (0.05)	0.000298	0.08 (0.03)	0.00233155	0.11 (0.12)	0.000861338	0.24 (0.18)	-0.000219	0.37 (0.07)	0.00086142	0.1 (0.04)	0.00217268	0.3 (0.1)	2.04e-05	0.48 (0.15)	5.79896e-05	0.46 (0.11)	0.000542231	0.42 (0.13)	9.06667e-05	0.39 (0.07)	0.000604235
ADAMTS12	P250	4.98323e-05	0.04 (0.01)	-0.000106333	0.02 (0)	9.00344e-05	0.02 (0.01)	4.27714e-05	0.03 (0)	0.000107	0.04 (0.01)	4.28616e-06	0.03 (0.01)	5.81714e-05	0.05 (0.02)	4.25333e-05	0.08 (0.04)	8.29473e-06	0.05 (0.02)	-6.04473e-06	0.07 (0.03)	0.000286167	0.05 (0.01)	9.50351e-05
ADCYAP1	E163	2.37509e-05	0.05 (0.01)	-2.55e-05	0.05 (0.01)	1.85576e-05	0.04 (0.01)	6.09484e-05	0.09 (0.08)	-5e-06	0.04 (0.04)	-2.25162e-07	0.05 (0.02)	3.15476e-06	0.04 (0.01)	3.93333e-06	0.14 (0.08)	3.95093e-05	0.06 (0.04)	-3.56742e-05	0.07 (0.06)	2.53333e-05	0.05 (0.02)	6.72863e-05
ADCYAP1	P398	0.000128496	0.08 (0.02)	2.51667e-05	0.07 (0.05)	8.98057e-07	0.04 (0.03)	0.000566644	0.13 (0.14)	7e-06	0.05 (0.02)	1.6565e-05	0.13 (0.11)	0.00020444	0.09 (0.05)	-5.79e-05	0.13 (0.07)	-1.27752e-06	0.11 (0.09)	-0.000149594	0.19 (0.21)	-1.98333e-05	0.09 (0.03)	0.000396377
ADCYAP1	P455	4.94938e-05	0.06 (0.02)	1.15e-05	0.03 (0.02)	3.02249e-05	0.04 (0.03)	3.4577e-05	0.14 (0.09)	6e-06	0.05 (0.02)	1.504e-05	0.06 (0.03)	1.17286e-05	0.07 (0.03)	-1.88333e-05	0.12 (0.07)	4.17393e-06	0.12 (0.1)	5.9679e-05	0.12 (0.09)	1.28333e-05	0.08 (0.02)	0.000136625
AFF3	P122	0.00681711	0.91 (0.03)	0.0013495	0.08 (0.04)	0.011856	0.96 (0.01)	0.0063711	0.93 (0.03)	0.000638	0.2 (0.08)	0.0087807	0.91 (0.07)	0.00486573	0.95 (0.01)	0.002762	0.95 (0.02)	0.00641617	0.92 (0.04)	0.00325747	0.92 (0.03)	0.0012	0.9 (0.04)	0.00583242
AFF3	P808	0.000176797	0.96 (0.01)	0.000343167	0.98 (0)	0.000375666	0.98 (0.01)	0.000181087	0.95 (0.01)	9.4e-05	0.96 (0.01)	0.000283071	0.97 (0.01)	1.70294e-05	0.96 (0.01)	0.000500733	0.97 (0.01)	1.26856e-05	0.97 (0.01)	0.000164308	0.97 (0)	3.36667e-05	0.97 (0.01)	2.01215e-05
AFP	P824	0.000328603	0.91 (0.01)	8.25e-05	0.95 (0.01)	0.00114729	0.95 (0.01)	0.0002584	0.94 (0.01)	0.000123	0.91 (0.02)	0.000515016	0.93 (0.02)	5.75397e-06	0.91 (0.01)	0.000256333	0.89 (0.04)	2.3332e-05	0.92 (0.03)	3.41192e-05	0.92 (0.01)	-2e-06	0.92 (0.02)	2.59472e-05
AGTR1	P154	3.66774e-05	0.08 (0.04)	-3.85e-05	0.05 (0.02)	5.05582e-07	0.05 (0.02)	3.24302e-05	0.08 (0.06)	-1.3e-05	0.05 (0.01)	1.56861e-05	0.13 (0.08)	6.19286e-05	0.11 (0.06)	7.65e-05	0.05 (0.01)	3.76407e-05	0.08 (0.02)	-3.90988e-05	0.07 (0.01)	-5.01667e-05	0.1 (0.07)	0.000103695
AGTR1	P41	0.000143345	0.03 (0.01)	-4.93333e-05	0.03 (0.01)	4.64711e-06	0.02 (0.01)	0.000250493	0.04 (0.01)	8e-06	0.03 (0.02)	5.4845e-06	0.06 (0.04)	4.18246e-05	0.04 (0.01)	-4.92333e-05	0.04 (0.04)	1.17471e-05	0.05 (0.01)	-8.57411e-05	0.04 (0.01)	-3.61667e-05	0.05 (0.04)	0.000551835
AGXT	E115	0.000979448	0.94 (0.02)	0.000169833	0.97 (0.01)	0.000165205	0.96 (0.01)	0.00129082	0.94 (0)	0.000143	0.94 (0.02)	4.42927e-05	0.93 (0.01)	0.00122764	0.93 (0.02)	0.000305067	0.74 (0.08)	0.00810519	0.94 (0.02)	0.000237784	0.95 (0.01)	6.65e-05	0.95 (0.02)	0.000388831
AGXT	P180	0.00093617	0.88 (0.02)	0.000380833	0.83 (0.05)	7.04483e-05	0.95 (0.03)	0.00108153	0.74 (0.15)	-0.000312	0.89 (0.03)	7.89151e-05	0.92 (0.04)	0.000332632	0.95 (0.01)	0.0013718	0.42 (0.13)	0.00728278	0.92 (0.04)	0.000758361	0.9 (0.03)	-3.7e-05	0.9 (0.03)	0.000481978
AHR	E103	0.000274369	0.03 (0.01)	3.81667e-05	0.02 (0)	0.000104033	0.03 (0.01)	-5.64921e-06	0.03 (0)	8e-06	0.02 (0.01)	3.16023e-06	0.03 (0.01)	1.10524e-05	0.04 (0.01)	3.93667e-05	0.04 (0.01)	-4.10317e-06	0.03 (0.01)	-0.00037687	0.03 (0.01)	-8.41667e-05	0.03 (0.01)	0.00123293
AHR	P166	0.00011422	0.08 (0.05)	-3.73333e-05	0.02 (0)	0.000264151	0.1 (0.14)	-4.13175e-06	0.03 (0)	8.9e-05	0.06 (0.04)	2.29404e-05	0.03 (0.01)	0.000377781	0.09 (0.03)	0.000125967	0.07 (0.05)	2.81201e-05	0.09 (0.04)	0.000131948	0.07 (0.03)	3.53333e-05	0.07 (0.03)	0.000142788
AIM2	E208	0.00017264	0.9 (0.03)	-3.65e-05	0.91 (0.02)	1.453e-05	0.92 (0.02)	0.000388184	0.92 (0.01)	4.3e-05	0.93 (0.02)	4.07572e-05	0.81 (0.06)	0.00148231	0.88 (0.03)	-7.95333e-05	0.78 (0.08)	0.000295517	0.9 (0.02)	7.29654e-06	0.92 (0.03)	0.000122833	0.89 (0.03)	0.000171693
AIM2	P624	0.000340221	0.85 (0.01)	0.000579667	0.54 (0.15)	0.000226484	0.94 (0.02)	0.00200051	0.86 (0.05)	6.6e-05	0.73 (0.09)	8.836e-05	0.88 (0.08)	0.000467734	0.73 (0.06)	0.00217383	0.9 (0.04)	0.000106162	0.87 (0.08)	0.000314362	0.85 (0.02)	0.000311167	0.86 (0.05)	0.000150539
AKT1	P310	4.25131e-05	0.07 (0.02)	-5.51667e-05	0.05 (0.01)	5.58408e-05	0.06 (0.01)	5.72968e-05	0.04 (0.02)	9.8e-05	0.09 (0.02)	5.82814e-06	0.06 (0.01)	5.05905e-05	0.09 (0.01)	8.93333e-05	0.11 (0.05)	1.65937e-05	0.09 (0.03)	-3.38688e-05	0.07 (0.02)	-2e-05	0.08 (0.01)	0.000103634
ALK	E183	0.00113267	0.11 (0.02)	0.000295333	0.04 (0.01)	0.00332166	0.05 (0.04)	0.000625122	0.12 (0.03)	0.000142	0.09 (0.02)	0.000915034	0.05 (0.02)	0.00278399	0.12 (0.02)	0.000588033	0.31 (0.13)	0.00041668	0.14 (0.03)	0.000458118	0.15 (0.1)	0.000198333	0.12 (0.02)	0.000704508
ALK	P28	0.00137517	0.12 (0.04)	0.000207167	0.02 (0.01)	0.00350826	0.03 (0.02)	0.00276909	0.23 (0.04)	0.000325	0.13 (0.03)	0.000975394	0.03 (0.01)	0.00405979	0.12 (0.05)	-0.000182833	0.25 (0.09)	0.000369278	0.13 (0.04)	0.000375834	0.18 (0.07)	0.000349667	0.14 (0.04)	0.000921208
ALOX12	E85	0.000936866	0.42 (0.2)	-0.000143333	0.5 (0.19)	0.000108436	0.36 (0.16)	0.000620681	0.47 (0.17)	-1.8e-05	0.14 (0.08)	0.00143415	0.39 (0.16)	0.00019939	0.58 (0.16)	0.0001848	0.29 (0.11)	0.00106693	0.69 (0.12)	0.000707709	0.46 (0.19)	-2.5e-05	0.69 (0.11)	0.0015131
ALOX12	P223	0.000142681	0.43 (0.18)	-3.11667e-05	0.46 (0.2)	8.13089e-06	0.62 (0.19)	4.29722e-05	0.29 (0.31)	-1.1e-05	0.22 (0.14)	0.00022685	0.34 (0.14)	9.75071e-05	0.57 (0.13)	1.46333e-05	0.31 (0.12)	0.000152896	0.68 (0.12)	0.000100224	0.52 (0.18)	-7.85e-05	0.66 (0.11)	0.000236541
ALPL	P278	0.000253968	0.04 (0.01)	0.0001725	0.01 (0)	0.00059053	0.04 (0.02)	0.000126728	0.03 (0.01)	3.9e-05	0.02 (0)	0.000149936	0.03 (0.01)	4.8873e-06	0.04 (0.01)	0.000171267	0.03 (0.01)	0.000166327	0.04 (0.04)	2.47384e-06	0.03 (0.01)	4.75e-05	0.03 (0.01)	0.000419333
ALPL	P433	8.59084e-05	0.31 (0.07)	-7.11667e-05	0.29 (0.08)	4.046e-06	0.54 (0.17)	0.000652973	0.18 (0.2)	9e-06	0.28 (0.06)	5.45268e-06	0.25 (0.06)	5.06698e-05	0.26 (0.05)	3.91667e-05	0.3 (0.07)	4.21923e-06	0.31 (0.11)	-4.61195e-05	0.3 (0.05)	1.31667e-05	0.25 (0.04)	0.000189526
AOC3	P890	0.000180459	0.42 (0.08)	0.000330167	0.71 (0.06)	3.00651e-05	0.7 (0.07)	0.000676121	0.27 (0.2)	0.000213	0.64 (0.07)	4.73603e-05	0.58 (0.08)	1.53286e-05	0.41 (0.09)	0.000520533	0.27 (0.09)	0.000335194	0.53 (0.07)	7.8534e-05	0.38 (0.15)	0.000355	0.55 (0.07)	0.000217069
APBA1	E99	3.78434e-05	0.06 (0.03)	-3.06667e-05	0.1 (0.01)	5.78964e-05	0.09 (0.03)	3.30484e-05	0.08 (0.09)	-4.7e-05	0.12 (0.06)	3.79194e-06	0.12 (0.04)	0.000102181	0.05 (0.03)	1.6e-05	0.06 (0.05)	1.06344e-05	0.06 (0.02)	9.63745e-06	0.06 (0.03)	3.58333e-05	0.06 (0.02)	7.80536e-05
APBA1	P644	8.5606e-05	0.05 (0.01)	3.48333e-05	0.03 (0)	0.000254839	0.03 (0.01)	0.000316663	0.06 (0.01)	1.9e-05	0.05 (0.02)	1.48782e-06	0.05 (0.01)	7.11333e-05	0.06 (0.01)	0.000110133	0.07 (0.01)	8.1364e-05	0.06 (0.02)	0.000104187	0.05 (0.01)	-0.000103167	0.05 (0.01)	3.52963e-05
APBA2	P227	0.000173864	0.93 (0.01)	0.000199167	0.91 (0.02)	9.52441e-06	0.93 (0.01)	0.000105914	0.92 (0.01)	7.8e-05	0.91 (0.02)	4.27974e-06	0.93 (0.01)	0.00012081	0.85 (0.03)	0.00437567	0.94 (0.02)	3.01915e-05	0.94 (0.01)	0.000303051	0.92 (0.02)	0.000155167	0.93 (0.02)	9.30602e-05
APBA2	P305	0.000469147	0.88 (0.03)	0.000131667	0.9 (0.02)	2.31642e-05	0.94 (0.01)	0.00662488	0.91 (0.06)	0.000198	0.89 (0.03)	9.74375e-06	0.87 (0.04)	0.000746733	0.83 (0.02)	0.00148273	0.91 (0.03)	-6.53328e-06	0.91 (0.02)	0.000233497	0.84 (0.07)	0.000235833	0.89 (0.02)	0.000128102
APC	E117	0.00176162	0.27 (0.05)	1.8e-05	0.16 (0.02)	0.000380185	0.17 (0.03)	0.00234118	0.3 (0.07)	0.000123	0.22 (0.05)	9.66353e-05	0.18 (0.03)	0.00197319	0.28 (0.03)	0.00119697	0.9 (0.04)	0.0120105	0.34 (0.05)	0.00127265	0.27 (0.06)	-4.43333e-05	0.31 (0.05)	0.00133587
APC	P14	0.00219401	0.18 (0.06)	-0.000563833	0.09 (0.03)	0.000381591	0.1 (0.04)	0.00290755	0.15 (0.11)	-0.000203	0.17 (0.06)	3.57777e-05	0.12 (0.02)	0.00467467	0.15 (0.03)	0.0021529	0.83 (0.13)	0.00568649	0.24 (0.09)	0.000191604	0.23 (0.06)	0.000458333	0.28 (0.08)	0.00478828
APC	P280	0.00217425	0.05 (0.01)	-0.000128	0.02 (0.01)	0.000378327	0.03 (0.01)	0.00197225	0.03 (0)	0.000457	0.02 (0.01)	0.000196506	0.03 (0.01)	0.00180049	0.04 (0.01)	0.00120787	0.48 (0.11)	0.0117052	0.07 (0.02)	0.00117529	0.04 (0.01)	0.000329333	0.07 (0.02)	0.00303616
APOA1	P261	0.00246264	0.82 (0.03)	0.000316	0.97 (0)	0.0124673	0.73 (0.16)	0.00111177	0.45 (0.24)	0.000345	0.91 (0.02)	0.00088184	0.89 (0.05)	0.000918802	0.67 (0.12)	0.000773133	0.89 (0.03)	0.00106296	0.79 (0.04)	0.000840643	0.78 (0.1)	0.000291333	0.8 (0.06)	0.00107803
APOA1	P75	2.90357e-05	0.72 (0.26)	4.11667e-05	0.92 (0.14)	6.12057e-05	0.82 (0.22)	1.60611e-05	0.87 (0.02)	-5e-06	0.89 (0.11)	8.28035e-06	0.9 (0.02)	3.38929e-05	0.62 (0.33)	0.000100933	0.91 (0.04)	1.26483e-05	0.88 (0.03)	1.07999e-06	0.8 (0.11)	3.23333e-05	0.86 (0.09)	4.36519e-05
APOC1	P406	0.000162797	0.85 (0.02)	0.000109333	0.82 (0.03)	7.30448e-06	0.8 (0.02)	0.00013676	0.85 (0.01)	5.8e-05	0.83 (0.03)	5.49726e-06	0.8 (0.01)	0.000474587	0.85 (0.03)	1.87667e-05	0.71 (0.08)	0.000712829	0.87 (0.03)	0.000715742	0.84 (0.03)	-4.38333e-05	0.84 (0.03)	2.65784e-06
APOC2	P377	3.00631e-05	0.76 (0.06)	0.0002835	0.84 (0.05)	5.8062e-06	0.85 (0.03)	4.50364e-05	0.59 (0.36)	-3.1e-05	0.83 (0.04)	4.0567e-06	0.77 (0.05)	7.48548e-05	0.78 (0.06)	4.97333e-05	0.77 (0.08)	1.26142e-05	0.83 (0.03)	2.42543e-05	0.83 (0.02)	0.0001505	0.82 (0.03)	3.24618e-05
APP	E8	0.000740012	0.05 (0.01)	0.000258333	0.02 (0)	0.00063426	0.02 (0.01)	0.0018523	0.05 (0.01)	0.000188	0.04 (0.01)	0.000180386	0.02 (0)	0.00300799	0.05 (0.01)	0.000616933	0.05 (0.02)	0.000172755	0.06 (0.02)	0.0012204	0.04 (0.01)	7.66667e-06	0.04 (0.01)	0.000893387
APP	P179	0.000698868	0.08 (0.03)	1.81667e-05	0.02 (0)	0.0020771	0.04 (0.03)	0.000481462	0.05 (0.01)	0.00017	0.09 (0.03)	0.000553447	0.03 (0.01)	0.00139511	0.08 (0.04)	8.71667e-05	0.14 (0.07)	2.78145e-05	0.13 (0.05)	0.000215816	0.12 (0.07)	7.3e-05	0.1 (0.02)	0.000578323
AREG	E25	8.38061e-05	0.05 (0.01)	-3.86667e-05	0.03 (0.01)	4.12896e-05	0.07 (0.14)	4.34237e-05	0.04 (0.01)	-4e-06	0.04 (0.01)	6.83543e-06	0.04 (0.01)	1.81095e-05	0.05 (0.01)	9.84e-05	0.05 (0.01)	1.10397e-06	0.05 (0.01)	-0.0001315	0.04 (0)	1.46667e-05	0.05 (0.01)	0.00033868
AREG	P217	6.16159e-05	0.14 (0.05)	5.81667e-05	0.11 (0.02)	5.05935e-05	0.27 (0.11)	0.000541187	0.09 (0.06)	1.1e-05	0.16 (0.05)	1.23338e-05	0.1 (0.03)	0.000314534	0.16 (0.07)	-5.35333e-05	0.21 (0.11)	7.58009e-07	0.19 (0.06)	4.9905e-05	0.13 (0.02)	1.66667e-06	0.16 (0.05)	1.4206e-07
ARHGAP9	P260	0.000185242	0.89 (0.03)	-1.91667e-05	0.93 (0.01)	0.000799911	0.92 (0.01)	0.000102401	0.92 (0.01)	2.4e-05	0.89 (0.02)	0.000138892	0.91 (0.01)	4.66246e-05	0.89 (0.03)	2.83e-05	0.86 (0.03)	5.89559e-05	0.88 (0.02)	0.00013331	0.92 (0.01)	9.88333e-05	0.9 (0.02)	4.44226e-05
ARHGAP9	P518	3.44804e-05	0.91 (0.02)	-7.88333e-05	0.93 (0.01)	0.000153549	0.92 (0.01)	4.7246e-06	0.93 (0.01)	-2.4e-05	0.9 (0.02)	2.28602e-05	0.92 (0.01)	-4.69762e-06	0.91 (0.02)	-3.50667e-05	0.89 (0.02)	2.12569e-05	0.9 (0.02)	3.06836e-05	0.93 (0)	0.000176333	0.92 (0.02)	9.35902e-06
ARHGDIB	P148	9.83657e-05	0.56 (0.09)	-3.53333e-05	0.4 (0.08)	1.16397e-05	0.68 (0.11)	0.000367994	0.45 (0.26)	-3.4e-05	0.32 (0.07)	0.000122643	0.5 (0.11)	1.63635e-05	0.56 (0.07)	2.10333e-05	0.47 (0.11)	1.33853e-05	0.51 (0.09)	-9.72835e-05	0.61 (0.09)	0.000249167	0.52 (0.08)	0.000191401
ARNT	P238	5.83978e-06	0.04 (0.02)	-3.36667e-05	0.03 (0.01)	1.84002e-05	0.04 (0.03)	-8.65079e-06	0.02 (0)	6.5e-05	0.06 (0.03)	7.77784e-06	0.04 (0.01)	2.07214e-05	0.03 (0.01)	5.76667e-06	0.06 (0.05)	-1.3119e-06	0.04 (0.01)	3.44288e-06	0.03 (0.01)	-3.16667e-06	0.03 (0.01)	2.723e-06
ASB4	E89	0.000310207	0.9 (0.02)	5.56667e-05	0.96 (0.01)	0.00107814	0.94 (0.02)	0.000115532	0.93 (0.01)	-2e-05	0.93 (0.02)	4.42933e-05	0.92 (0.01)	0.000401862	0.82 (0.05)	0.00222653	0.92 (0.03)	0.00015289	0.91 (0.02)	7.84133e-05	0.85 (0.1)	7.51667e-05	0.9 (0.02)	0.000218723
ASB4	P391	0.000258018	0.78 (0.07)	0.000329167	0.94 (0.01)	0.000427572	0.89 (0.09)	6.63817e-05	0.84 (0.07)	-6.8e-05	0.93 (0.02)	0.000141062	0.82 (0.03)	0.000713769	0.87 (0.01)	0.000277967	0.92 (0.02)	0.000175622	0.86 (0.04)	1.85346e-06	0.79 (0.16)	9.16667e-06	0.85 (0.04)	0.000401015
ASB4	P52	0.000124695	0.84 (0.07)	-1.08333e-05	0.96 (0.01)	0.000238257	0.9 (0.04)	4.80048e-05	0.87 (0.08)	-1.9e-05	0.95 (0.02)	6.28125e-05	0.9 (0.03)	6.03452e-05	0.78 (0.1)	0.000253	0.91 (0.08)	4.13682e-05	0.89 (0.05)	-2.65684e-05	0.82 (0.16)	7e-06	0.87 (0.04)	0.000249736
ASCL1	E24	0.000163667	0.03 (0)	0.00039	0.04 (0.01)	1.0838e-05	0.04 (0.01)	-5.42984e-05	0.04 (0.01)	5.3e-05	0.03 (0.02)	1.3028e-05	0.06 (0.01)	0.000481044	0.04 (0.01)	-2.36e-05	0.08 (0.11)	3.60029e-06	0.05 (0.02)	-7.79959e-05	0.05 (0.03)	-0.000182	0.05 (0.01)	0.000565486
ASCL1	P747	0.00042298	0.42 (0.1)	-1.48333e-05	0.34 (0.09)	1.78157e-05	0.16 (0.07)	0.00650963	0.6 (0.29)	-1.2e-05	0.42 (0.07)	3.21982e-05	0.37 (0.13)	-0.000788376	0.41 (0.08)	0.0003196	0.78 (0.12)	0.000631443	0.51 (0.07)	0.000299139	0.53 (0.15)	0.000112167	0.48 (0.07)	0.000178459
ASCL2	E76	0.000634077	0.13 (0.04)	-9.86667e-05	0.18 (0.02)	0.000992861	0.22 (0.13)	4.7796e-05	0.08 (0.02)	0.000182	0.1 (0.03)	0.0013558	0.24 (0.05)	0.000676654	0.16 (0.06)	-0.000104267	0.27 (0.11)	5.9451e-05	0.24 (0.19)	5.80038e-05	0.11 (0.03)	0.000330333	0.16 (0.07)	0.000398912
ASCL2	P360	2.99824e-05	0.12 (0.06)	-5.61667e-05	0.11 (0.03)	1.77915e-05	0.14 (0.06)	7.90079e-06	0.16 (0.19)	3.8e-05	0.09 (0.04)	1.34491e-05	0.16 (0.06)	4.20333e-05	0.16 (0.1)	-5.34e-05	0.21 (0.11)	4.6993e-06	0.25 (0.16)	0.000205046	0.14 (0.09)	-7.61667e-05	0.17 (0.1)	3.18158e-05
ASCL2	P609	0.00171129	0.31 (0.08)	2.43333e-05	0.23 (0.07)	0.00029834	0.25 (0.1)	0.000415356	0.4 (0.12)	0.000111	0.13 (0.03)	0.0038635	0.29 (0.08)	0.000407302	0.5 (0.06)	0.00160933	0.29 (0.1)	0.000576064	0.43 (0.12)	0.00103859	0.34 (0.1)	0.000264667	0.41 (0.08)	0.0019872
			Bladder (n=5)		Blood (n=30)		Brain (n=12)		Cervix (n=3)		Infant blood (n=55)		Head and neck (n=11)		Kidney (n=6)		Placenta (n=19)		Pleura (n=18)		Small intestine (n=5)		Lung (n=53)
GENE	CpG	Mean decrease in accuracy	Mean (sd)	Decrease in accuracy	Mean (sd)	Decrease in accuracy	Mean (sd)	Decrease in accuracy	Mean (sd)	Decrease in accuracy	Mean (sd)	Decrease in accuracy	Mean (sd)	Decrease in accuracy	Mean (sd)	Decrease in accuracy	Mean (sd)	Decrease in accuracy	Mean (sd)	Decrease in accuracy	Mean (sd)	Decrease in accuracy	Mean (sd)	Decrease in accuracy
ATP10A	P147	0.000162838	0.14 (0.05)	8.33333e-07	0.14 (0.03)	2.6958e-05	0.28 (0.12)	0.000459561	0.11 (0.07)	-1.1e-05	0.08 (0.03)	0.00016735	0.33 (0.1)	0.00104469	0.13 (0.05)	2.04667e-05	0.23 (0.1)	5.8989e-05	0.15 (0.05)	-1.19149e-06	0.34 (0.28)	0.000169833	0.13 (0.04)	0.000109241
ATP10A	P524	8.76458e-05	0.67 (0.03)	0.000129333	0.72 (0.08)	-3.25905e-07	0.71 (0.07)	3.30627e-05	0.56 (0.22)	-0.000115	0.65 (0.08)	2.26083e-06	0.75 (0.08)	0.000196262	0.41 (0.08)	0.0028888	0.7 (0.13)	-9.33497e-06	0.66 (0.1)	-7.66878e-06	0.73 (0.05)	6.85e-05	0.69 (0.07)	2.67355e-05
AXL	E61	1.12653e-05	0.16 (0.07)	2.1e-05	0.14 (0.06)	-1.0901e-08	0.08 (0.08)	2.52135e-05	0.08 (0.03)	1.2e-05	0.14 (0.04)	2.56612e-06	0.11 (0.07)	3.30714e-06	0.12 (0.04)	2.06667e-06	0.1 (0.06)	4.00079e-06	0.14 (0.04)	1.23956e-06	0.12 (0.02)	3.55e-05	0.13 (0.04)	2.73112e-05
AXL	P223	0.00120064	0.15 (0.08)	0.000246333	0.41 (0.12)	2.4151e-05	0.22 (0.08)	0.000780115	0.12 (0.16)	0.00016	0.59 (0.1)	0.00345817	0.1 (0.06)	0.000916377	0.16 (0.09)	0.000414233	0.12 (0.07)	0.00120053	0.22 (0.07)	0.000544761	0.22 (0.07)	0.000206333	0.22 (0.1)	0.000395505
B3GALT5	E246	1.6757e-05	0.79 (0.03)	1.83333e-05	0.81 (0.03)	4.2584e-06	0.77 (0.05)	4.35556e-06	0.84 (0.05)	-2e-06	0.8 (0.05)	4.55485e-07	0.74 (0.06)	0.000140667	0.8 (0.04)	1.48333e-05	0.84 (0.04)	6.58738e-06	0.79 (0.07)	1.5003e-05	0.71 (0.2)	-5.08333e-05	0.82 (0.05)	2.9231e-05
B3GALT5	P330	0.000333592	0.92 (0.01)	-2.63333e-05	0.95 (0.01)	0.00109725	0.95 (0.01)	0.00019866	0.93 (0.03)	-3e-05	0.91 (0.02)	0.000573171	0.95 (0.01)	0.000160925	0.92 (0.02)	7.48667e-05	0.93 (0.03)	9.5803e-06	0.92 (0.01)	9.1064e-06	0.93 (0.01)	1.9e-05	0.92 (0.02)	3.77618e-05
BAX	E281	0.00139398	0.73 (0.05)	0.000362333	0.71 (0.03)	3.89006e-05	0.56 (0.09)	0.00439856	0.62 (0.07)	0.000218	0.72 (0.05)	3.74308e-05	0.5 (0.11)	0.00506053	0.63 (0.07)	0.00146527	0.52 (0.1)	0.00440203	0.75 (0.06)	0.000571197	0.72 (0.09)	-5e-05	0.76 (0.05)	0.00160729
BCAM	E100	0.000240352	0.03 (0.01)	-1e-06	0.02 (0)	0.000256769	0.03 (0.01)	-8.88016e-06	0.03 (0)	5.9e-05	0.03 (0.01)	2.6339e-05	0.03 (0.01)	0.000121663	0.04 (0.01)	0.0001681	0.04 (0.02)	2.86932e-05	0.04 (0.01)	-0.000200232	0.04 (0.01)	-6.5e-05	0.04 (0.01)	0.000851251
BCAM	P205	0.000703712	0.26 (0.05)	2.66667e-05	0.13 (0.04)	0.000633746	0.14 (0.04)	0.00186615	0.16 (0.11)	8.1e-05	0.29 (0.08)	0.000101089	0.15 (0.05)	0.00197017	0.27 (0.07)	-0.000126	0.25 (0.08)	2.96299e-05	0.39 (0.1)	0.000200011	0.3 (0.09)	-0.000161167	0.36 (0.08)	0.00155155
BCL2A1	P1127	0.00095854	0.96 (0.01)	-0.0001415	0.97 (0.01)	0.000246409	0.97 (0.01)	0.000977782	0.96 (0.02)	-1.5e-05	0.94 (0.02)	0.000176558	0.96 (0.01)	0.000880013	0.96 (0.01)	0.0005414	0.85 (0.08)	0.00615259	0.97 (0.01)	0.000579805	0.97 (0)	0.000313833	0.97 (0.01)	0.000796451
BCL2L2	E172	2.20786e-05	0.08 (0.04)	1.23333e-05	0.05 (0.02)	-3.89873e-07	0.04 (0.02)	0.00010249	0.04 (0)	0.00012	0.06 (0.04)	-8.04647e-08	0.05 (0.01)	1.20286e-05	0.07 (0.02)	3.03e-05	0.07 (0.02)	1.38531e-05	0.07 (0.02)	2.08753e-05	0.08 (0.02)	-1.66667e-07	0.08 (0.03)	3.97886e-05
BCL2L2	P280	2.55203e-05	0.16 (0.1)	-4.78333e-05	0.21 (0.08)	4.07681e-05	0.09 (0.04)	6.00135e-05	0.21 (0.13)	-3e-05	0.13 (0.06)	3.90462e-06	0.17 (0.07)	-4.36587e-06	0.15 (0.06)	-7.66667e-06	0.09 (0.06)	1.34924e-05	0.18 (0.09)	-5.0582e-05	0.18 (0.11)	-2.3e-05	0.19 (0.07)	8.29003e-05
BCL3	E71	0.000322948	0.39 (0.09)	-6.83333e-06	0.2 (0.05)	0.000428139	0.18 (0.11)	0.000394534	0.27 (0.21)	-0.000107	0.36 (0.04)	0.000176906	0.21 (0.03)	0.0013056	0.38 (0.08)	-7.29667e-05	0.41 (0.11)	1.43638e-05	0.44 (0.07)	0.000137201	0.44 (0.04)	9.55e-05	0.44 (0.05)	0.00048359
BCL3	P1038	0.000365555	0.04 (0.01)	7.53333e-05	0.02 (0)	0.00126302	0.03 (0.01)	0.000393786	0.05 (0.03)	1.8e-05	0.02 (0.01)	1.02495e-05	0.03 (0)	-1.85048e-05	0.04 (0.01)	0.0002186	0.05 (0.02)	0.000391908	0.04 (0.01)	0.000283273	0.03 (0.01)	4.96667e-05	0.04 (0.01)	0.000411762
BCL6	P248	1.17748e-05	0.05 (0.02)	3.03333e-05	0.06 (0.03)	-7.58983e-07	0.07 (0.03)	2.00079e-06	0.03 (0)	0.000141	0.09 (0.04)	2.64616e-07	0.06 (0.03)	-2.17373e-05	0.08 (0.03)	-2.86667e-05	0.09 (0.06)	1.67386e-06	0.08 (0.02)	3.0208e-05	0.07 (0.02)	-3e-05	0.08 (0.03)	3.74302e-05
BCR	P346	0.00766727	0.53 (0.1)	0.00122583	0.66 (0.12)	0.0068018	0.34 (0.15)	0.00479188	0.43 (0.22)	0.00048	0.92 (0.02)	0.0178798	0.56 (0.11)	0.00402868	0.23 (0.11)	0.0046612	0.78 (0.1)	0.00152928	0.63 (0.12)	0.00271972	0.67 (0.04)	0.00137217	0.6 (0.08)	0.00506085
BCR	P422	0.00119441	0.6 (0.07)	0.000290833	0.63 (0.1)	0.000690986	0.68 (0.15)	0.000143517	0.47 (0.21)	0.000166	0.81 (0.04)	0.00268739	0.49 (0.12)	0.00128735	0.43 (0.1)	0.00102083	0.66 (0.1)	0.00105368	0.56 (0.12)	0.000196094	0.65 (0.06)	0.000313667	0.55 (0.1)	0.000890284
BDNF	E19	0.000106971	0.17 (0.04)	8.83333e-06	0.09 (0.03)	0.000156094	0.19 (0.04)	9.31556e-05	0.28 (0.2)	-6e-06	0.1 (0.03)	0.000126126	0.25 (0.07)	0.000165398	0.23 (0.06)	0.000106933	0.38 (0.17)	0.000173767	0.21 (0.08)	3.99512e-05	0.17 (0.06)	-2.33333e-05	0.17 (0.05)	6.19026e-05
BDNF	P259	4.20942e-05	0.24 (0.04)	6.58333e-05	0.21 (0.06)	1.03579e-06	0.2 (0.12)	2.49325e-05	0.21 (0.21)	5.4e-05	0.21 (0.06)	3.48988e-05	0.3 (0.12)	-4.41984e-06	0.29 (0.05)	3.56e-05	0.51 (0.17)	4.45394e-05	0.34 (0.1)	0.000125079	0.24 (0.13)	4.78333e-05	0.31 (0.07)	4.9382e-05
BIRC5	E89	7.05478e-05	0.03 (0.01)	2.23333e-05	0.02 (0.01)	4.73838e-05	0.02 (0.01)	5.23556e-05	0.03 (0)	6e-05	0.03 (0.04)	-2.1633e-07	0.03 (0)	3.72841e-05	0.03 (0.01)	8.11e-05	0.04 (0.03)	4.88514e-06	0.07 (0.08)	0.000364946	0.03 (0)	-1.8e-05	0.03 (0.02)	0.000104167
BLK	P14	0.000300093	0.78 (0.04)	0.0001515	0.87 (0.02)	6.28019e-05	0.63 (0.13)	0.00133215	0.82 (0.02)	1.7e-05	0.81 (0.11)	4.60227e-06	0.85 (0.06)	0.000135004	0.8 (0.01)	0.0005115	0.52 (0.16)	0.00142939	0.85 (0.03)	0.000257102	0.8 (0.05)	0.000102333	0.83 (0.04)	0.000134832
BLK	P668	1.60001e-05	0.94 (0.01)	1.2e-05	0.95 (0.01)	1.38245e-05	0.96 (0.01)	4.875e-05	0.94 (0.05)	1.9e-05	0.95 (0.02)	5.14766e-06	0.94 (0.02)	3.81429e-06	0.96 (0.01)	-7.5e-06	0.86 (0.09)	2.90156e-05	0.95 (0.02)	7.41705e-05	0.96 (0.01)	-1.35e-05	0.95 (0.01)	2.55138e-06
BMP2	E48	0.000423898	0.04 (0.01)	0.000151	0.03 (0.01)	2.50349e-05	0.02 (0.01)	0.00229859	0.14 (0.16)	-4e-05	0.04 (0.02)	2.51427e-05	0.05 (0.03)	0.000274139	0.04 (0.01)	0.000375967	0.51 (0.25)	0.00243523	0.06 (0.03)	9.31419e-05	0.05 (0.01)	0.000169167	0.05 (0.02)	0.000168434
BMP2	P1201	0.000104777	0.15 (0.1)	0.000319833	0.03 (0.01)	1.27724e-05	0.07 (0.05)	-5.83571e-06	0.09 (0.1)	-1.6e-05	0.07 (0.04)	1.72275e-06	0.07 (0.04)	-1.4127e-05	0.08 (0.03)	-4.93333e-06	0.06 (0.03)	6.72483e-07	0.06 (0.03)	-0.000121484	0.06 (0.02)	1.65e-05	0.06 (0.01)	0.000450763
BMP3	E147	0.000335571	0.14 (0.03)	0.000128167	0.07 (0.02)	0.000140502	0.09 (0.1)	0.000210329	0.09 (0.06)	8.3e-05	0.17 (0.04)	8.19139e-05	0.08 (0.02)	0.000526737	0.16 (0.04)	-8.86667e-05	0.24 (0.08)	5.74912e-05	0.21 (0.05)	0.000976623	0.18 (0.04)	-2.5e-05	0.16 (0.03)	0.000691454
BMP3	P56	3.27144e-05	0.03 (0.01)	-4.33333e-06	0.02 (0.01)	3.1533e-05	0.03 (0.05)	8.29273e-05	0.04 (0)	4.2e-05	0.03 (0.01)	8.03574e-06	0.03 (0.01)	5.6169e-05	0.04 (0.01)	5.46667e-06	0.06 (0.03)	1.67443e-05	0.04 (0.01)	4.49763e-05	0.03 (0.01)	3.88333e-05	0.04 (0.01)	4.53023e-05
BMP4	P123	0.000490914	0.19 (0.05)	6.65e-05	0.08 (0.02)	0.00021966	0.35 (0.13)	0.00148366	0.16 (0.14)	-0.00017	0.11 (0.04)	8.8596e-05	0.09 (0.02)	0.00197402	0.23 (0.1)	0.000206167	0.15 (0.08)	-6.52806e-06	0.22 (0.06)	0.000224553	0.18 (0.07)	-0.000115333	0.22 (0.04)	0.00100458
BMP4	P199	0.00117119	0.59 (0.11)	0.0003265	0.39 (0.11)	0.000586592	0.68 (0.13)	0.00167574	0.4 (0.33)	-0.000241	0.2 (0.06)	0.00218007	0.35 (0.16)	0.00016504	0.6 (0.08)	0.0007043	0.43 (0.09)	0.000509689	0.49 (0.08)	0.000585739	0.37 (0.14)	-0.000428167	0.54 (0.08)	0.00143603
BMP6	P163	0.000203883	0.08 (0.03)	-8.33333e-05	0.04 (0.01)	7.57817e-05	0.07 (0.13)	0.000118472	0.04 (0.01)	0.000133	0.05 (0.02)	2.54633e-05	0.04 (0.02)	9.6473e-05	0.07 (0.02)	-5.06667e-06	0.08 (0.04)	-5.6923e-06	0.11 (0.05)	0.000112012	0.09 (0.03)	8.16667e-05	0.09 (0.02)	0.000669274
BMP6	P398	0.000148246	0.04 (0.01)	5.26667e-05	0.02 (0)	9.02799e-05	0.03 (0.01)	-8.14048e-06	0.04 (0.01)	-1.4e-05	0.03 (0.01)	3.13152e-05	0.04 (0.01)	1.28468e-05	0.03 (0.01)	6.8e-06	0.05 (0.02)	9.42712e-06	0.04 (0.01)	-0.000276035	0.03 (0.01)	-5.2e-05	0.04 (0.01)	0.000625329
BMPR1A	E88	3.9274e-05	0.78 (0.04)	-1.63333e-05	0.75 (0.04)	1.91885e-06	0.79 (0.06)	9.26984e-06	0.73 (0.05)	-2e-05	0.7 (0.07)	1.81534e-05	0.77 (0.02)	7.98579e-05	0.76 (0.04)	-1.66e-05	0.59 (0.14)	0.000250163	0.77 (0.06)	8.69221e-06	0.78 (0.04)	1.25e-05	0.78 (0.04)	2.72579e-05
BMPR1A	P956	2.7454e-05	0.05 (0.02)	9.6e-05	0.05 (0.03)	7.48606e-06	0.02 (0.01)	8.61659e-05	0.03 (0)	4.6e-05	0.03 (0.01)	-6.13484e-07	0.03 (0.01)	1.98881e-05	0.03 (0.01)	-5.66667e-06	0.03 (0.01)	1.18936e-05	0.05 (0.02)	3.09086e-05	0.04 (0.01)	-2.83333e-05	0.05 (0.02)	5.56375e-05
BMPR2	E435	0.000451116	0.04 (0.02)	3.33333e-07	0.06 (0.01)	0.000325344	0.08 (0.03)	0.000309951	0.03 (0.01)	5e-05	0.03 (0.01)	3.79909e-05	0.1 (0.01)	0.00553638	0.04 (0.01)	0.0003198	0.03 (0.02)	2.12895e-05	0.03 (0.01)	0.000179563	0.03 (0.01)	8.13333e-05	0.03 (0.01)	0.000366048
BMPR2	P1271	2.45665e-05	0.06 (0.02)	-1.55e-05	0.04 (0.02)	3.00461e-05	0.07 (0.04)	-4.55476e-06	0.03 (0)	0.000195	0.11 (0.05)	9.18028e-06	0.05 (0.02)	-4.45238e-06	0.09 (0.03)	-1.05e-05	0.07 (0.06)	1.40455e-06	0.08 (0.03)	2.20347e-05	0.07 (0.02)	-3.3e-05	0.07 (0.02)	6.30453e-05
BRCA1	P835	0.00120963	0.76 (0.09)	0.0001535	0.77 (0.11)	4.83963e-05	0.73 (0.08)	0.000628656	0.71 (0.16)	5.2e-05	0.7 (0.09)	3.09685e-05	0.69 (0.08)	0.000589916	0.74 (0.15)	0.0003171	0.2 (0.09)	0.0114345	0.74 (0.06)	0.000402019	0.72 (0.06)	9.56667e-05	0.75 (0.09)	0.000528974
BSG	P211	0.00075183	0.19 (0.07)	0.002326	0.05 (0.01)	0.000234748	0.1 (0.05)	0.00178501	0.03 (0.01)	0.000372	0.03 (0.03)	0.000139616	0.09 (0.03)	0.00356807	0.13 (0.07)	0.0011263	0.09 (0.07)	6.29464e-05	0.15 (0.22)	0.000454149	0.06 (0.04)	0.000155833	0.04 (0.02)	0.00110629
C20orf47	P225	2.03857e-05	0.06 (0.01)	2.66667e-06	0.05 (0.02)	-1.59105e-06	0.04 (0.01)	0.000211942	0.04 (0)	7.5e-05	0.05 (0.01)	9.86131e-07	0.05 (0.01)	0.000165744	0.05 (0.01)	-3.44667e-05	0.06 (0.03)	-9.57792e-07	0.05 (0.01)	-2.48039e-05	0.06 (0.01)	5.23333e-05	0.05 (0.01)	4.64355e-06
C4B	E171	0.00067177	0.55 (0.05)	0.000202833	0.78 (0.05)	0.000977539	0.57 (0.09)	0.000230483	0.53 (0.08)	4.4e-05	0.75 (0.04)	0.00105112	0.58 (0.07)	0.000462233	0.4 (0.1)	0.000699467	0.56 (0.09)	0.000368152	0.53 (0.05)	0.000438647	0.6 (0.09)	2.8e-05	0.53 (0.07)	0.000576169
C4B	P191	9.52446e-05	0.91 (0.03)	-0.000155333	0.97 (0.01)	0.000134136	0.93 (0.01)	0.000106239	0.93 (0)	6.4e-05	0.96 (0.01)	7.76632e-05	0.94 (0.01)	9.86095e-05	0.86 (0.03)	0.0011362	0.96 (0.02)	4.38398e-05	0.93 (0.02)	2.96308e-05	0.94 (0.02)	2.95e-05	0.92 (0.02)	5.0898e-05
CALCA	E174	8.25084e-05	0.28 (0.19)	-2.93333e-05	0.32 (0.09)	5.56871e-05	0.29 (0.17)	3.15476e-06	0.25 (0.35)	4.2e-05	0.17 (0.06)	0.000161725	0.31 (0.18)	-9.37698e-06	0.21 (0.07)	1.08e-05	0.44 (0.21)	4.25793e-06	0.37 (0.22)	-2.59009e-05	0.36 (0.11)	-4.33333e-06	0.31 (0.1)	0.000146396
CALCA	P171	9.32666e-05	0.37 (0.07)	1.11667e-05	0.53 (0.07)	2.48948e-05	0.34 (0.09)	0.000100155	0.22 (0.29)	3.6e-05	0.45 (0.05)	3.66344e-05	0.36 (0.09)	8.06063e-05	0.38 (0.12)	-3.53333e-06	0.67 (0.11)	0.000542225	0.42 (0.08)	-2.29365e-05	0.4 (0.04)	5.15e-05	0.38 (0.07)	7.3044e-05
CALCA	P75	2.85422e-05	0.11 (0.02)	2.96667e-05	0.09 (0.02)	5.73808e-06	0.07 (0.03)	6.59897e-05	0.14 (0.19)	2.3e-05	0.08 (0.03)	1.75552e-05	0.1 (0.05)	7.51984e-06	0.1 (0.03)	-2.08667e-05	0.18 (0.08)	4.34184e-05	0.17 (0.14)	9.86574e-05	0.1 (0.02)	-2.25e-05	0.11 (0.02)	2.61929e-05
CAPG	E228	0.00235421	0.58 (0.17)	0.00051	0.02 (0.01)	0.00738852	0.79 (0.12)	0.00456152	0.22 (0.17)	-2.7e-05	0.08 (0.04)	0.000708618	0.2 (0.07)	0.0021594	0.73 (0.06)	0.00365373	0.67 (0.17)	0.00228881	0.36 (0.14)	0.000873331	0.4 (0.13)	0.000336667	0.35 (0.1)	0.00173001
CARD15	P302	0.000775991	0.22 (0.04)	0.000760667	0.21 (0.11)	0.000139377	0.76 (0.14)	0.00420212	0.3 (0.24)	1.4e-05	0.5 (0.11)	0.000166972	0.2 (0.15)	0.000947451	0.51 (0.04)	0.00111353	0.74 (0.12)	0.000953253	0.34 (0.17)	0.000131845	0.21 (0.06)	0.000812167	0.38 (0.08)	0.00114543
CARD15	P665	0.00438248	0.8 (0.06)	0.000903833	0.32 (0.08)	0.00658509	0.9 (0.03)	0.00559971	0.86 (0.05)	0.000645	0.37 (0.11)	0.00546655	0.77 (0.1)	0.00163393	0.85 (0.03)	0.0029029	0.9 (0.04)	0.00501103	0.79 (0.05)	0.00207185	0.68 (0.1)	0.000354333	0.75 (0.05)	0.00409761
CASP10	E139	0.000943258	0.23 (0.08)	0.00235683	0.04 (0.02)	0.000150403	0.61 (0.16)	0.00927256	0.12 (0.07)	-1e-05	0.05 (0.02)	4.16796e-05	0.26 (0.12)	0.00321171	0.08 (0.01)	0.0006899	0.07 (0.02)	8.41624e-05	0.1 (0.03)	-0.000171205	0.12 (0.05)	-0.000226167	0.08 (0.02)	0.00086478
CASP10	P186	0.000669818	0.2 (0.11)	0.000521833	0.02 (0.01)	0.000446978	0.59 (0.21)	0.00517576	0.11 (0.08)	-7.9e-05	0.08 (0.03)	4.85752e-05	0.13 (0.07)	0.000404113	0.09 (0.03)	-4.72667e-05	0.13 (0.06)	5.2691e-05	0.13 (0.05)	0.000646138	0.11 (0.06)	-0.000147833	0.09 (0.02)	0.000980557
CASP10	P334	0.000361851	0.32 (0.12)	0.000219	0.19 (0.09)	3.17014e-06	0.7 (0.14)	0.00619092	0.3 (0.24)	-0.000131	0.13 (0.05)	2.8487e-05	0.27 (0.07)	0.000159933	0.21 (0.07)	0.0001292	0.18 (0.08)	3.45329e-05	0.22 (0.08)	6.10365e-05	0.23 (0.11)	-5.16667e-05	0.2 (0.06)	9.01401e-05
CASP2	P192	2.21122e-05	0.1 (0.04)	-5.51667e-05	0.04 (0.02)	1.50132e-05	0.05 (0.01)	7.66349e-05	0.03 (0)	0.000213	0.08 (0.03)	-1.36355e-06	0.06 (0.02)	4.45913e-05	0.06 (0.02)	-5.9e-06	0.13 (0.1)	4.14863e-08	0.09 (0.03)	4.33424e-05	0.07 (0.03)	-5.86667e-05	0.08 (0.03)	3.60231e-05
CASP3	P420	2.82332e-05	0.06 (0.03)	-4.15e-05	0.03 (0.01)	7.14063e-05	0.05 (0.01)	2.22786e-05	0.09 (0.1)	-2e-05	0.05 (0.02)	2.88432e-06	0.05 (0.01)	4.10937e-05	0.07 (0.01)	8.46667e-05	0.07 (0.03)	1.48203e-06	0.07 (0.02)	0.000101464	0.06 (0.02)	5.18333e-05	0.06 (0.02)	1.3034e-05
CASP6	P201	4.52354e-05	0.07 (0.03)	-9e-06	0.04 (0.03)	3.18461e-05	0.04 (0.02)	7.20627e-05	0.07 (0)	4.1e-05	0.09 (0.03)	2.87036e-05	0.04 (0.02)	0.000172476	0.1 (0.03)	-5.9e-06	0.11 (0.03)	7.63723e-06	0.11 (0.02)	0.000121805	0.08 (0.03)	-6e-05	0.09 (0.03)	4.55239e-05
CASP6	P230	0.000303881	0.06 (0.02)	-1.63333e-05	0.02 (0.01)	0.000138201	0.03 (0.03)	0.000117036	0.08 (0.05)	5.6e-05	0.05 (0.01)	5.10564e-05	0.03 (0.01)	0.000667893	0.05 (0.01)	0.000175667	0.06 (0.02)	1.30416e-05	0.07 (0.05)	-0.000273593	0.05 (0.01)	-5.86667e-05	0.06 (0.01)	0.00102302
CASP8	E474	0.00275916	0.64 (0.04)	0.000523167	0.09 (0.02)	0.0128338	0.74 (0.07)	0.0023647	0.54 (0.02)	0.000223	0.32 (0.05)	0.00132968	0.49 (0.15)	0.000841197	0.61 (0.07)	0.0006585	0.49 (0.08)	0.00117448	0.58 (0.11)	0.000666894	0.52 (0.1)	0.0001665	0.57 (0.07)	0.00144315
CAV1	P130	0.0003381	0.12 (0.04)	2.98333e-05	0.05 (0.01)	0.000847817	0.05 (0.04)	0.000263845	0.16 (0.14)	-0.000127	0.17 (0.05)	0.000268095	0.06 (0.03)	0.000358598	0.13 (0.01)	0.000196233	0.17 (0.08)	1.39335e-05	0.17 (0.05)	0.000384973	0.13 (0.02)	0.000167333	0.13 (0.03)	0.000316126
CAV1	P169	3.88319e-05	0.22 (0.07)	-1.4e-05	0.23 (0.08)	-3.21672e-06	0.12 (0.05)	0.000304812	0.14 (0.14)	2.1e-05	0.29 (0.07)	3.16263e-05	0.15 (0.06)	4.38071e-05	0.25 (0.08)	7.56667e-06	0.22 (0.08)	-2.79747e-06	0.24 (0.05)	1.49423e-07	0.26 (0.06)	2.41667e-05	0.22 (0.05)	4.70831e-05
CAV2	E33	3.9457e-05	0.03 (0.01)	4.85e-05	0.02 (0.01)	1.73321e-05	0.12 (0.17)	5.50032e-05	0.04 (0.01)	2e-06	0.04 (0.03)	4.23988e-06	0.03 (0.01)	1.65159e-05	0.05 (0.02)	-6.42667e-05	0.05 (0.02)	3.15397e-06	0.05 (0.01)	2.86626e-05	0.05 (0.02)	-8.61667e-05	0.04 (0.01)	0.000130245
CCKAR	E79	0.000532277	0.84 (0.04)	0.000346	0.92 (0.02)	0.00133371	0.5 (0.12)	0.0016186	0.41 (0.32)	0.000126	0.84 (0.04)	9.28728e-05	0.79 (0.09)	-5.81048e-05	0.25 (0.12)	0.00297683	0.54 (0.12)	0.000663366	0.78 (0.05)	0.000289839	0.69 (0.18)	8.9e-05	0.78 (0.07)	0.000303137
CCKAR	P270	7.80613e-05	0.88 (0.02)	4.91667e-05	0.91 (0.02)	2.69893e-05	0.82 (0.03)	0.000343767	0.68 (0.23)	0	0.89 (0.03)	2.74163e-06	0.88 (0.04)	-3.57802e-05	0.78 (0.05)	0.00105233	0.89 (0.03)	9.52082e-06	0.88 (0.02)	8.0878e-05	0.79 (0.1)	0.000247333	0.88 (0.03)	5.89418e-05
CCKBR	P361	0.000309078	0.04 (0)	0.0001705	0.02 (0)	0.000270447	0.02 (0.01)	0.000312021	0.04 (0)	0.000115	0.02 (0.01)	0.000134145	0.02 (0.01)	0.000314842	0.04 (0.01)	0.000153	0.05 (0.01)	0.000214904	0.05 (0.01)	0.000116051	0.04 (0)	0.0001125	0.04 (0.01)	0.000670513
CCKBR	P480	0.000234096	0.05 (0.01)	-2.76667e-05	0.03 (0.02)	1.66596e-05	0.03 (0.01)	0.000105687	0.06 (0.03)	5e-06	0.03 (0.01)	2.93858e-05	0.04 (0.03)	2.97873e-05	0.05 (0.02)	-1.71667e-05	0.04 (0.01)	5.22944e-07	0.09 (0.15)	-0.000146967	0.05 (0.01)	-1.55e-05	0.06 (0.02)	0.000943238
CCL3	E53	9.14005e-05	0.81 (0.03)	4.35e-05	0.64 (0.06)	5.41654e-05	0.85 (0.11)	0.000372634	0.82 (0.13)	5e-06	0.65 (0.07)	0.000116212	0.8 (0.06)	4.05151e-05	0.77 (0.06)	0.000119467	0.63 (0.09)	0.00010172	0.75 (0.15)	-5.7633e-06	0.83 (0.04)	2.45e-05	0.79 (0.06)	6.82841e-05
CCL3	P543	0.000238986	0.9 (0.02)	8.43333e-05	0.97 (0.01)	0.000117736	0.96 (0.01)	0.000167833	0.82 (0.08)	0.000368	0.95 (0.01)	8.40124e-05	0.94 (0.02)	6.18667e-05	0.86 (0.03)	0.000938633	0.83 (0.05)	0.000371842	0.91 (0.08)	4.88888e-05	0.9 (0.06)	0.0001375	0.94 (0.02)	0.000471697
CCNA1	E7	6.9091e-05	0.08 (0.04)	-2.5e-06	0.03 (0.02)	1.59641e-05	0.05 (0.04)	9.58413e-06	0.03 (0)	0.000113	0.04 (0.03)	1.35001e-05	0.26 (0.19)	0.000169696	0.11 (0.08)	-5.87333e-05	0.07 (0.05)	3.76335e-07	0.1 (0.03)	-2.90571e-05	0.34 (0.38)	6.76667e-05	0.1 (0.05)	0.000221015
CCNA1	P216	7.87915e-05	0.09 (0.05)	-3.66667e-06	0.03 (0.01)	0.000116153	0.05 (0.05)	0.00019947	0.11 (0.13)	-2.8e-05	0.05 (0.03)	5.26476e-06	0.08 (0.05)	-2.05563e-05	0.09 (0.04)	4.26e-05	0.1 (0.06)	4.75115e-06	0.13 (0.05)	9.23339e-05	0.23 (0.26)	4.26667e-05	0.11 (0.04)	0.000162948
CCNC	P132	6.62964e-05	0.03 (0.01)	1.6e-05	0.01 (0)	0.000137854	0.02 (0.01)	0.000279985	0.05 (0.05)	-2.8e-05	0.03 (0.01)	6.04819e-06	0.02 (0)	0.000151557	0.03 (0.01)	8.65e-05	0.04 (0.01)	1.33672e-05	0.04 (0.01)	9.79876e-05	0.03 (0.01)	-1.15e-05	0.03 (0.03)	4.33379e-05
CCND1	E280	0.000415794	0.06 (0.01)	8.23333e-05	0.03 (0.01)	0.000209629	0.04 (0.02)	0.000491728	0.04 (0.01)	0.000229	0.06 (0.02)	2.07825e-05	0.03 (0.01)	0.00156207	0.08 (0.03)	-3.21333e-05	0.1 (0.05)	3.78241e-05	0.1 (0.03)	0.000914237	0.08 (0.02)	3.45e-05	0.09 (0.02)	0.000787674
CCND1	P343	1.28259e-05	0.14 (0.08)	-2.2e-05	0.06 (0.02)	1.34408e-05	0.06 (0.03)	8.71508e-06	0.13 (0.17)	2e-05	0.09 (0.06)	-1.63657e-06	0.05 (0.02)	2.74635e-05	0.07 (0.03)	8.1e-06	0.1 (0.08)	2.27739e-06	0.12 (0.06)	1.95112e-05	0.09 (0.02)	1.56667e-05	0.1 (0.03)	2.5818e-05
CCND2	P887	0.000229739	0.05 (0.02)	0.000100167	0.02 (0)	0.000650653	0.03 (0.01)	2.93867e-05	0.04 (0.01)	6.4e-05	0.03 (0.01)	6.65002e-05	0.03 (0.01)	0.000630442	0.06 (0.02)	0.000265267	0.06 (0.04)	5.94177e-05	0.05 (0.01)	0.000378537	0.04 (0.01)	0.000124	0.05 (0.04)	0.00015623
CCND2	P898	0.000188731	0.04 (0.01)	3.83333e-06	0.01 (0)	0.000303975	0.02 (0.01)	0.000235463	0.03 (0)	2.4e-05	0.04 (0.02)	2.27718e-05	0.02 (0)	0.000654033	0.07 (0.03)	0.0003415	0.07 (0.06)	4.02331e-05	0.07 (0.06)	0.000137786	0.04 (0.01)	-4.66667e-06	0.05 (0.04)	0.000278367
CCND3	P435	0.000201131	0.07 (0.01)	-4.53333e-05	0.03 (0.01)	0.000267174	0.05 (0.01)	2.6727e-05	0.06 (0.04)	-3.9e-05	0.09 (0.02)	0.000209642	0.05 (0.02)	5.74444e-05	0.06 (0.01)	6.63333e-06	0.09 (0.03)	1.58577e-05	0.08 (0.03)	0.00010376	0.07 (0.02)	-2.68333e-05	0.06 (0.01)	0.00040759
CCNE1	P683	2.86455e-05	0.1 (0.01)	4.38333e-05	0.08 (0.02)	2.21765e-05	0.09 (0.02)	2.07714e-05	0.11 (0.04)	-3.7e-05	0.09 (0.01)	2.48259e-05	0.08 (0.02)	6.85786e-05	0.1 (0.02)	-5.53333e-06	0.11 (0.03)	3.32178e-06	0.12 (0.02)	-1.72518e-06	0.13 (0.01)	0.0001495	0.12 (0.03)	3.76495e-05
CCR5	P630	0.000152302	0.57 (0.08)	-1.3e-05	0.58 (0.06)	2.26431e-05	0.61 (0.12)	2.40444e-05	0.7 (0.08)	4.5e-05	0.58 (0.07)	1.3757e-05	0.52 (0.07)	7.53611e-05	0.58 (0.11)	-9.07667e-05	0.28 (0.12)	0.00105026	0.62 (0.07)	-4.23266e-05	0.65 (0.04)	9.18333e-05	0.63 (0.05)	0.0002027
CD1A	P414	9.70137e-05	0.95 (0.01)	6.15e-05	0.97 (0.01)	0.000216391	0.97 (0.01)	8.08937e-05	0.93 (0.04)	-3.1e-05	0.94 (0.02)	0.000111516	0.96 (0)	4.61722e-05	0.95 (0.01)	0.000339767	0.94 (0.02)	4.85708e-05	0.97 (0.01)	0.000118941	0.96 (0)	0.000164167	0.96 (0.01)	1.43226e-05
CD1A	P6	6.98201e-05	0.91 (0.02)	-0.000148667	0.91 (0.01)	2.28971e-05	0.91 (0.03)	4.92556e-05	0.83 (0.19)	-8.5e-05	0.91 (0.02)	1.42402e-05	0.89 (0.02)	0.000112035	0.88 (0.04)	0.000412733	0.77 (0.08)	0.00039525	0.91 (0.03)	-2.85569e-05	0.93 (0.01)	0.000607667	0.91 (0.02)	1.27067e-05
CD2	P68	0.00543867	0.81 (0.03)	0.00132667	0.09 (0.02)	0.0107349	0.91 (0.03)	0.00441252	0.84 (0.1)	0.000502	0.18 (0.06)	0.00654241	0.83 (0.1)	0.00394552	0.91 (0.02)	0.0031206	0.92 (0.03)	0.00505611	0.82 (0.16)	0.00160024	0.82 (0.06)	0.001038	0.82 (0.07)	0.00481966
CD34	E20	0.000380144	0.27 (0.07)	9.9e-05	0.15 (0.03)	0.000306521	0.13 (0.06)	0.000913134	0.35 (0.08)	0.000197	0.27 (0.05)	8.33041e-05	0.13 (0.02)	0.00257402	0.27 (0.09)	-0.0002057	0.36 (0.1)	6.02054e-05	0.32 (0.06)	0.000232102	0.33 (0.06)	0.00019	0.3 (0.05)	0.000456601
CD34	P339	0.00557231	0.72 (0.14)	0.001523	0.36 (0.05)	0.00297759	0.87 (0.07)	0.00774857	0.82 (0.07)	0.000652	0.26 (0.05)	0.00707152	0.81 (0.1)	0.00658555	0.81 (0.05)	0.00517497	0.83 (0.09)	0.00872782	0.69 (0.08)	0.00181625	0.67 (0.2)	0.000729	0.64 (0.08)	0.00612295
CD34	P780	0.00295033	0.64 (0.15)	0.00135383	0.24 (0.07)	0.00200371	0.78 (0.08)	0.00607344	0.85 (0.03)	0.00137	0.24 (0.06)	0.0028281	0.73 (0.14)	0.00497343	0.71 (0.06)	0.0039129	0.72 (0.09)	0.0045316	0.58 (0.1)	0.000828221	0.58 (0.14)	0.000534667	0.54 (0.07)	0.00295273
CD40	E58	0.000117975	0.11 (0.05)	-1.53333e-05	0.03 (0.02)	7.42099e-05	0.24 (0.08)	0.00134627	0.07 (0.04)	-7.8e-05	0.05 (0.02)	2.23735e-05	0.05 (0.02)	0.000204289	0.16 (0.06)	0.0004622	0.12 (0.06)	2.05717e-05	0.1 (0.06)	2.77451e-05	0.07 (0.02)	4.35e-05	0.08 (0.04)	1.8563e-05
CD40	P372	0.000177534	0.33 (0.12)	3.38333e-05	0.13 (0.04)	2.70421e-05	0.52 (0.17)	0.00169434	0.05 (0)	0.000239	0.11 (0.04)	0.000124492	0.18 (0.09)	0.000176778	0.34 (0.12)	7.75e-05	0.53 (0.14)	0.000213462	0.26 (0.13)	6.10089e-06	0.2 (0.06)	0.000108167	0.23 (0.09)	5.02535e-05
CD44	E26	0.000159245	0.03 (0.01)	-1.1e-05	0.02 (0)	0.0002332	0.05 (0.02)	5.92968e-05	0.03 (0)	4.2e-05	0.03 (0.01)	2.53583e-05	0.03 (0.01)	0.00010144	0.04 (0.01)	9.89667e-05	0.27 (0.18)	0.000829232	0.04 (0.02)	2.12254e-05	0.03 (0.01)	-1.53333e-05	0.04 (0.01)	0.000113984
CD44	P87	0.000199899	0.06 (0.02)	0.0002145	0.06 (0.03)	3.02685e-05	0.18 (0.07)	0.000862394	0.04 (0)	0.000246	0.15 (0.05)	4.64752e-05	0.06 (0.02)	0.000459629	0.06 (0.02)	0.000295167	0.21 (0.12)	0.000216491	0.08 (0.03)	6.35775e-05	0.08 (0.02)	0.000103167	0.07 (0.02)	0.000266579
			Bladder (n=5)		Blood (n=30)		Brain (n=12)		Cervix (n=3)		Infant blood (n=55)		Head and neck (n=11)		Kidney (n=6)		Placenta (n=19)		Pleura (n=18)		Small intestine (n=5)		Lung (n=53)
GENE	CpG	Mean decrease in accuracy	Mean (sd)	Decrease in accuracy	Mean (sd)	Decrease in accuracy	Mean (sd)	Decrease in accuracy	Mean (sd)	Decrease in accuracy	Mean (sd)	Decrease in accuracy	Mean (sd)	Decrease in accuracy	Mean (sd)	Decrease in accuracy	Mean (sd)	Decrease in accuracy	Mean (sd)	Decrease in accuracy	Mean (sd)	Decrease in accuracy	Mean (sd)	Decrease in accuracy
CD81	P211	0.000357695	0.19 (0.03)	0.000272833	0.13 (0.03)	0.000114862	0.12 (0.04)	0.000268243	0.06 (0.01)	0.00056	0.07 (0.03)	0.000556914	0.25 (0.11)	0.000840194	0.16 (0.05)	9.23333e-05	0.19 (0.07)	0.000302679	0.25 (0.14)	0.000549406	0.15 (0.05)	-9.4e-05	0.16 (0.04)	0.000268666
CD81	P272	0.000321294	0.52 (0.14)	-6.36667e-05	0.66 (0.1)	2.99763e-05	0.24 (0.1)	0.00226271	0.29 (0.16)	0.000201	0.51 (0.07)	6.96716e-05	0.54 (0.15)	-0.000214322	0.46 (0.15)	6.53333e-05	0.45 (0.14)	9.074e-05	0.7 (0.09)	0.000591705	0.61 (0.07)	2.16667e-06	0.65 (0.07)	0.000553563
CD82	P557	7.65742e-05	0.12 (0.08)	-3.33333e-05	0.33 (0.12)	4.08604e-05	0.28 (0.13)	8.13563e-05	0.03 (0.01)	0.000175	0.4 (0.14)	4.50309e-05	0.12 (0.09)	4.03698e-05	0.1 (0.05)	0.000114567	0.13 (0.1)	1.88942e-05	0.16 (0.07)	-7.10806e-06	0.16 (0.1)	-4.43333e-05	0.15 (0.04)	0.000196211
CD86	P3	0.00502839	0.81 (0.04)	0.000933167	0.13 (0.07)	0.00656657	0.79 (0.1)	0.00381922	0.9 (0.04)	0.000688	0.13 (0.05)	0.0072161	0.71 (0.12)	0.00367823	0.85 (0.03)	0.00202463	0.94 (0.03)	0.00611044	0.77 (0.17)	0.00198592	0.78 (0.12)	0.000941667	0.77 (0.06)	0.00458528
CD9	E14	0.000207199	0.06 (0.02)	2.93333e-05	0.03 (0.01)	0.000135074	0.03 (0.02)	0.000349913	0.08 (0.07)	8.9e-05	0.05 (0.02)	4.61676e-05	0.03 (0.01)	0.000901305	0.07 (0.02)	0.000221467	0.1 (0.06)	5.51487e-05	0.08 (0.02)	0.000193767	0.06 (0.01)	9.18333e-05	0.07 (0.01)	0.000319082
CD9	P504	0.000315733	0.11 (0.04)	0.000309167	0.22 (0.08)	0.000267338	0.31 (0.09)	0.000243221	0.16 (0.13)	-8.8e-05	0.07 (0.03)	0.000521644	0.14 (0.06)	7.4173e-05	0.45 (0.11)	0.00131707	0.07 (0.04)	0.000272233	0.31 (0.14)	0.000319859	0.16 (0.07)	3.3e-05	0.27 (0.11)	0.000162215
CD9	P585	0.000202307	0.37 (0.08)	0.000135333	0.43 (0.09)	2.27481e-05	0.68 (0.19)	0.000580353	0.46 (0.1)	1.6e-05	0.31 (0.06)	0.000210106	0.28 (0.12)	0.000668041	0.7 (0.1)	0.000764033	0.38 (0.12)	3.89241e-05	0.64 (0.1)	0.000249809	0.53 (0.19)	-3.23333e-05	0.58 (0.13)	0.00012422
CDC25B	E83	0.000497598	0.08 (0.08)	-4.66667e-06	0.02 (0)	0.00157141	0.02 (0.02)	0.000373113	0.12 (0.15)	-8.3e-05	0.15 (0.06)	0.000503547	0.03 (0.02)	0.00021084	0.09 (0.05)	-5.85333e-05	0.14 (0.11)	3.26146e-05	0.12 (0.05)	0.000406283	0.06 (0.02)	0.000104333	0.07 (0.03)	0.000321617
CDC25B	P11	4.35451e-05	0.04 (0.01)	-9.16667e-06	0.03 (0.01)	3.40847e-05	0.04 (0.01)	-1.12365e-05	0.03 (0.01)	2e-05	0.03 (0.01)	1.45475e-05	0.05 (0.01)	0.00057563	0.04 (0.01)	-1.86667e-06	0.04 (0.01)	2.04696e-05	0.04 (0.01)	-4.92165e-06	0.03 (0.01)	-4.95e-05	0.04 (0.01)	2.23611e-05
CDH1	P45	6.17036e-05	0.18 (0.08)	-3.8e-05	0.09 (0.06)	2.47672e-05	0.09 (0.06)	8.05002e-05	0.11 (0.06)	1.6e-05	0.15 (0.04)	1.03264e-05	0.15 (0.05)	-1.58492e-06	0.2 (0.08)	-8.73e-05	0.2 (0.12)	2.63115e-06	0.25 (0.08)	0.000118796	0.17 (0.03)	2.7e-05	0.21 (0.06)	0.000174206
CDH1	P52	7.45298e-05	0.14 (0.07)	-2.05e-05	0.06 (0.03)	9.40907e-06	0.05 (0.03)	0.00011076	0.05 (0.03)	1.4e-05	0.06 (0.02)	4.86085e-05	0.1 (0.04)	-1.4719e-05	0.09 (0.03)	-1.5e-05	0.12 (0.05)	1.19683e-06	0.13 (0.03)	3.91394e-05	0.12 (0.02)	0.000119667	0.12 (0.03)	0.000208389
CDH11	E102	0.000102972	0.06 (0.02)	-4.53333e-05	0.04 (0.01)	1.31341e-05	0.04 (0.01)	0.000171181	0.04 (0)	0.000164	0.04 (0.01)	2.32138e-05	0.08 (0.03)	0.00021796	0.05 (0.01)	6.99333e-05	0.25 (0.17)	0.000412548	0.07 (0.02)	4.70703e-05	0.06 (0.02)	1.1e-05	0.06 (0.02)	0.000101974
CDH11	P203	0.000103775	0.04 (0.01)	-1.38333e-05	0.03 (0.01)	3.32537e-06	0.02 (0.01)	0.000354853	0.07 (0.07)	-1.9e-05	0.02 (0.01)	3.84223e-05	0.07 (0.05)	1.25056e-05	0.04 (0.01)	-2.37333e-05	0.33 (0.23)	0.000188441	0.06 (0.02)	-4.4625e-05	0.05 (0.03)	-8.33333e-07	0.06 (0.03)	0.000233803
CDH11	P354	0.00010225	0.28 (0.04)	3.96667e-05	0.29 (0.06)	7.07258e-05	0.11 (0.06)	0.000260963	0.15 (0.1)	2.2e-05	0.19 (0.05)	0.000112152	0.22 (0.14)	2.11873e-05	0.2 (0.09)	3.43667e-05	0.57 (0.18)	0.000327859	0.31 (0.09)	-4.18934e-05	0.33 (0.12)	-3.56667e-05	0.31 (0.08)	7.38734e-05
CDH13	E102	0.000214608	0.05 (0.03)	-2.11667e-05	0.07 (0.03)	1.34473e-05	0.02 (0.01)	0.00135362	0.08 (0.1)	5.3e-05	0.05 (0.03)	1.69195e-05	0.1 (0.09)	4.21833e-05	0.07 (0.05)	7.13333e-06	0.53 (0.24)	0.000835928	0.11 (0.13)	-2.05146e-05	0.08 (0.03)	4.96667e-05	0.1 (0.04)	0.000222344
CDH13	P88	0.00116828	0.28 (0.14)	-6.66667e-06	0.24 (0.09)	4.48385e-05	0.16 (0.17)	0.00112806	0.19 (0.17)	1.2e-05	0.19 (0.08)	8.64789e-05	0.27 (0.14)	0.00045491	0.23 (0.13)	8.13333e-05	0.89 (0.05)	0.00673057	0.41 (0.17)	3.79815e-05	0.34 (0.16)	-0.000115833	0.43 (0.09)	0.00203122
CDH17	E31	0.00121154	0.91 (0.03)	0.000312333	0.97 (0)	0.00511059	0.96 (0.01)	0.000399961	0.8 (0.07)	0.000385	0.94 (0.02)	0.00079508	0.96 (0.01)	0.0012454	0.7 (0.14)	0.002721	0.88 (0.03)	0.000428697	0.92 (0.03)	0.000386368	0.88 (0.07)	0.000231167	0.92 (0.02)	0.000377222
CDH17	P376	2.19265e-05	0.92 (0.02)	-4.5e-05	0.94 (0.01)	1.97363e-05	0.94 (0.01)	7.09056e-05	0.94 (0.02)	5.5e-05	0.92 (0.02)	2.69908e-06	0.93 (0.02)	1.04484e-05	0.89 (0.02)	0.000304633	0.93 (0.02)	1.68405e-06	0.92 (0.02)	-8.71001e-06	0.86 (0.12)	-1.81667e-05	0.91 (0.02)	2.58284e-05
CDH17	P532	8.04412e-05	0.95 (0.02)	8.83333e-06	0.97 (0.01)	0.000158505	0.97 (0.01)	5.385e-05	0.97 (0.01)	4.9e-05	0.94 (0.02)	0.000148497	0.96 (0.01)	1.79365e-05	0.95 (0.01)	3.73e-05	0.95 (0.02)	1.24545e-06	0.96 (0.01)	1.52989e-05	0.92 (0.05)	2.48333e-05	0.96 (0.01)	4.90289e-05
CDH3	E100	0.000381656	0.19 (0.05)	9.38333e-05	0.08 (0.02)	0.000384504	0.12 (0.06)	0.000292294	0.05 (0.02)	0.000378	0.32 (0.08)	0.000150649	0.11 (0.02)	0.000726644	0.14 (0.06)	0.0008043	0.27 (0.1)	1.84422e-05	0.31 (0.11)	0.00150993	0.14 (0.03)	0.0006565	0.18 (0.07)	0.000266385
CDH3	P87	0.000875071	0.06 (0.02)	0.0002285	0.13 (0.01)	0.00171509	0.12 (0.03)	8.63286e-05	0.04 (0.01)	0.000114	0.03 (0.02)	0.00041036	0.16 (0.02)	0.00727937	0.05 (0.02)	0.0004649	0.04 (0.01)	0.000161987	0.04 (0.01)	0.000253615	0.04 (0.01)	0.000225167	0.04 (0.01)	0.000599186
CDK10	E74	0.00118123	0.07 (0.03)	-4.28333e-05	0.02 (0)	0.00375346	0.03 (0.02)	0.000860956	0.12 (0.05)	0.000132	0.06 (0.02)	0.0010737	0.03 (0)	0.00310507	0.07 (0.01)	0.000394533	0.09 (0.04)	7.06234e-05	0.11 (0.03)	0.000920375	0.08 (0.02)	9.91667e-05	0.08 (0.02)	0.000433946
CDK10	P199	0.000141194	0.32 (0.11)	-5.1e-05	0.39 (0.12)	6.14375e-07	0.27 (0.08)	2.27135e-05	0.21 (0.21)	3.6e-05	0.41 (0.08)	4.00916e-05	0.26 (0.07)	3.3723e-05	0.2 (0.07)	0.000293433	0.18 (0.07)	0.000110789	0.34 (0.07)	-0.000104886	0.24 (0.08)	0.000176333	0.34 (0.06)	0.000484539
CDK2	P330	0.000254176	0.06 (0.04)	-0.000124833	0.04 (0.03)	2.22791e-05	0.25 (0.12)	0.0023284	0.05 (0.04)	5.1e-05	0.1 (0.04)	3.5158e-06	0.05 (0.02)	0.00046057	0.05 (0.02)	0.000242767	0.07 (0.04)	-6.22068e-06	0.07 (0.02)	0.000347744	0.06 (0.01)	1.5e-05	0.05 (0.01)	0.000283518
CDK6	E256	4.22531e-05	0.14 (0.03)	-4.35e-05	0.12 (0.01)	7.6237e-06	0.12 (0.02)	-7.01825e-06	0.11 (0.01)	5.7e-05	0.14 (0.03)	1.33337e-06	0.14 (0.01)	0.000210931	0.12 (0.02)	1.26e-05	0.18 (0.08)	-1.32304e-06	0.16 (0.05)	5.11737e-05	0.12 (0.03)	-2.5e-06	0.12 (0.02)	0.000110928
CDK6	P291	0.000905311	0.03 (0.01)	0.000391	0.02 (0.01)	0.000723056	0.03 (0.01)	0.000249331	0.09 (0.09)	-0.000197	0.1 (0.04)	0.00016075	0.03 (0)	0.000517133	0.04 (0.01)	0.0003462	0.07 (0.04)	7.61798e-05	0.08 (0.05)	0.000989771	0.04 (0.01)	0.000157667	0.04 (0.01)	0.00252179
CDKN1A	E101	5.21059e-05	0.05 (0.02)	-5.5e-05	0.03 (0.01)	3.01121e-05	0.03 (0.01)	9.33825e-05	0.03 (0.01)	9.3e-05	0.05 (0.02)	4.51455e-07	0.04 (0.01)	7.63262e-05	0.06 (0.02)	-3.9e-06	0.07 (0.03)	5.3456e-07	0.08 (0.02)	0.000130795	0.06 (0.01)	3.05e-05	0.06 (0.01)	0.000105472
CDKN1A	P242	0.000212144	0.04 (0.02)	-3.98333e-05	0.02 (0.01)	1.72926e-05	0.03 (0.01)	0.000127348	0.03 (0.01)	-9e-06	0.04 (0.03)	7.40543e-06	0.03 (0.01)	2.69452e-05	0.1 (0.14)	0.0005095	0.07 (0.07)	3.76359e-06	0.04 (0.01)	-0.000196905	0.03 (0)	0.000145	0.06 (0.09)	0.000815437
CDKN1B	P1161	0.000984305	0.03 (0.01)	0.000408167	0.01 (0)	0.000734061	0.05 (0.02)	0.000105805	0.06 (0.03)	-9.2e-05	0.04 (0.01)	8.81666e-05	0.02 (0.01)	0.00108159	0.04 (0.01)	7.00333e-05	0.3 (0.11)	0.00237886	0.08 (0.05)	0.00049114	0.03 (0.01)	0.0010875	0.06 (0.02)	0.00211818
CDKN1C	P6	0.000237412	0.16 (0.03)	0.000116	0.07 (0.02)	7.85391e-05	0.07 (0.04)	0.00100706	0.13 (0.08)	2e-06	0.12 (0.03)	1.76409e-05	0.08 (0.01)	0.000890184	0.16 (0.03)	0.000234967	0.2 (0.11)	1.56081e-05	0.19 (0.04)	0.000282231	0.17 (0.03)	0.000106667	0.16 (0.03)	0.000352367
CDKN1C	P626	0.000125172	0.09 (0.02)	1.83333e-05	0.05 (0.02)	1.91226e-05	0.04 (0.03)	0.000223094	0.04 (0.01)	0.000151	0.09 (0.03)	1.5577e-05	0.05 (0.02)	0.00020926	0.11 (0.04)	2e-05	0.38 (0.2)	0.000250549	0.19 (0.14)	0.000671882	0.1 (0.02)	3.46667e-05	0.1 (0.03)	3.92864e-05
CDKN2A	E121	0.00011167	0.08 (0.03)	-3.56667e-05	0.04 (0.01)	0.000104527	0.04 (0.01)	0.000194558	0.06 (0.01)	-2.7e-05	0.06 (0.02)	5.12392e-06	0.05 (0.01)	0.000143613	0.09 (0.02)	0.000263533	0.1 (0.05)	1.1306e-05	0.08 (0.02)	2.2899e-05	0.06 (0.02)	-7.23333e-05	0.07 (0.02)	0.000286476
CDKN2B	E220	4.0837e-05	0.07 (0.02)	-7.63333e-05	0.04 (0.01)	2.35514e-05	0.05 (0.01)	0.000148344	0.05 (0)	4.4e-05	0.06 (0.02)	-2.1749e-06	0.05 (0.01)	2.44e-05	0.06 (0.01)	3.74667e-05	0.08 (0.01)	2.92523e-05	0.08 (0.02)	0.000355263	0.07 (0.01)	-7.88333e-05	0.06 (0.01)	-5.43091e-06
CDKN2B	S294	4.5512e-05	0.1 (0.05)	6.38333e-05	0.06 (0.02)	3.89687e-06	0.13 (0.24)	-3.13571e-06	0.03 (0.03)	4.5e-05	0.04 (0.04)	7.26839e-06	0.08 (0.05)	3.8873e-06	0.07 (0.04)	-8.28667e-05	0.04 (0.03)	1.59073e-05	0.12 (0.04)	0.000431584	0.05 (0.02)	0.000126	0.08 (0.03)	2.10857e-05
CEACAM1	E57	0.0016071	0.18 (0.05)	0.000895333	0.02 (0)	0.00184299	0.64 (0.13)	0.0147841	0.09 (0.1)	-1.6e-05	0.03 (0.01)	0.000295011	0.12 (0.05)	0.00108661	0.11 (0.04)	0.000543433	0.04 (0.02)	0.000268607	0.17 (0.06)	0.0021582	0.13 (0.04)	9.61667e-05	0.1 (0.03)	0.0010746
CEACAM1	P44	0.00344436	0.65 (0.07)	0.00327133	0.13 (0.05)	0.000372653	0.88 (0.04)	0.0187448	0.26 (0.21)	6.2e-05	0.09 (0.03)	0.00374212	0.46 (0.15)	0.000973127	0.65 (0.08)	0.00497183	0.35 (0.1)	0.00178267	0.53 (0.11)	0.00440598	0.51 (0.13)	0.00124267	0.41 (0.09)	0.00302803
CEBPA	P1163	0.000107625	0.08 (0.03)	-3.3e-05	0.04 (0.01)	0.00011993	0.06 (0.03)	5.13968e-06	0.09 (0.06)	-5.8e-05	0.08 (0.03)	3.49152e-05	0.05 (0.02)	7.7031e-05	0.08 (0.03)	-2.45333e-05	0.17 (0.07)	0.000129046	0.11 (0.02)	0.000265774	0.08 (0.01)	-4.33333e-06	0.09 (0.01)	0.000188568
CEBPA	P706	2.68412e-05	0.09 (0.03)	-2.23333e-05	0.05 (0.01)	2.68384e-05	0.06 (0.01)	3.26381e-05	0.16 (0.2)	-2.1e-05	0.1 (0.04)	1.76172e-06	0.1 (0.06)	8.32381e-06	0.07 (0.02)	1.23333e-06	0.1 (0.07)	2.75942e-06	0.13 (0.09)	6.84108e-05	0.08 (0.03)	-1.76667e-05	0.09 (0.02)	6.49832e-05
CFTR	P115	0.000154189	0.06 (0.04)	-7.85e-05	0.02 (0.01)	3.69576e-05	0.02 (0.01)	0.000401671	0.03 (0.01)	9.1e-05	0.04 (0.02)	7.71685e-06	0.05 (0.04)	9.63595e-05	0.05 (0.02)	-3.2e-05	0.09 (0.07)	1.2855e-05	0.08 (0.03)	0.000130109	0.06 (0.01)	4.78333e-05	0.07 (0.03)	0.00044435
CFTR	P372	2.65581e-05	0.34 (0.08)	-3.13333e-05	0.22 (0.07)	3.87931e-05	0.23 (0.09)	4.97095e-05	0.24 (0.18)	4e-06	0.28 (0.09)	6.67858e-06	0.26 (0.1)	3.06413e-05	0.29 (0.1)	3.48e-05	0.46 (0.13)	1.43409e-05	0.43 (0.08)	0.000123971	0.35 (0.04)	2.33333e-06	0.39 (0.1)	9.87964e-06
CHD2	P451	0.000349962	0.93 (0.02)	5.1e-05	0.95 (0.02)	0.000386852	0.95 (0.01)	0.000106962	0.96 (0.01)	6.6e-05	0.9 (0.03)	0.00105928	0.94 (0.01)	4.2381e-05	0.93 (0.01)	6.63333e-05	0.93 (0.02)	9.68026e-06	0.95 (0.01)	0.000134178	0.95 (0)	0.000110167	0.95 (0.01)	1.40375e-05
CHD2	P667	7.06661e-05	0.9 (0.02)	-3.13333e-05	0.94 (0.01)	0.000236545	0.88 (0.04)	3.67921e-05	0.96 (0)	0.000275	0.9 (0.02)	7.38991e-05	0.91 (0.01)	6.57492e-05	0.88 (0.02)	0.000163667	0.9 (0.03)	-8.47547e-07	0.89 (0.02)	4.10737e-05	0.92 (0.01)	5.2e-05	0.9 (0.03)	3.23835e-07
CHFR	P501	4.77721e-05	0.2 (0.08)	-8.5e-06	0.06 (0.02)	0.000103257	0.1 (0.17)	9.99484e-05	0.15 (0.19)	-3.3e-05	0.19 (0.08)	7.69355e-06	0.08 (0.03)	0.000149971	0.16 (0.07)	-2.77e-05	0.19 (0.11)	-2.95253e-06	0.23 (0.09)	5.0972e-05	0.17 (0.04)	3.33333e-06	0.18 (0.06)	5.81504e-05
CHFR	P635	0.000127655	0.06 (0.01)	0.0001325	0.03 (0)	0.000247235	0.05 (0.02)	-2.39802e-05	0.05 (0)	1.2e-05	0.03 (0.01)	9.17769e-05	0.06 (0.01)	0.000213567	0.06 (0.01)	0.000187267	0.06 (0.01)	7.63087e-05	0.06 (0.04)	9.13398e-07	0.05 (0.01)	-3.21667e-05	0.04 (0.01)	0.000179622
CHGA	E52	2.80845e-05	0.14 (0.06)	-6.31667e-05	0.07 (0.02)	2.06402e-05	0.06 (0.03)	0.000172452	0.14 (0.14)	-2.1e-05	0.1 (0.03)	5.48865e-06	0.13 (0.06)	-2.03095e-06	0.18 (0.1)	-3.83667e-05	0.13 (0.06)	-2.0127e-06	0.22 (0.14)	0.000105108	0.23 (0.15)	0.000119333	0.15 (0.1)	1.98039e-05
CHGA	P243	2.70092e-05	0.37 (0.12)	-0.000154833	0.3 (0.12)	3.61912e-06	0.28 (0.15)	1.26294e-05	0.1 (0.09)	0.000125	0.39 (0.09)	2.8745e-05	0.27 (0.06)	2.83452e-05	0.19 (0.06)	0.0004353	0.22 (0.12)	1.17963e-05	0.35 (0.08)	7.63709e-06	0.46 (0.08)	0.000208833	0.35 (0.1)	9.80775e-07
CHI3L2	E10	0.000347999	0.79 (0.01)	0.0002855	0.83 (0.03)	7.05977e-05	0.84 (0.08)	0.000394461	0.54 (0.26)	0.000219	0.77 (0.04)	2.51024e-05	0.59 (0.1)	0.00192194	0.83 (0.04)	0.000378767	0.81 (0.05)	2.6978e-05	0.75 (0.05)	1.52085e-05	0.85 (0.05)	0.000726167	0.73 (0.07)	0.000747492
CHI3L2	P226	0.0032635	0.87 (0.02)	0.00502283	0.75 (0.05)	5.59958e-05	0.92 (0.03)	0.0112532	0.67 (0.28)	-0.000159	0.73 (0.05)	0.000205579	0.74 (0.1)	-0.000359614	0.86 (0.03)	0.00497383	0.93 (0.02)	0.00920333	0.79 (0.08)	-0.000273938	0.86 (0.06)	0.0035515	0.73 (0.07)	0.00615648
CLDN4	P1120	0.000460334	0.8 (0.09)	-3.06667e-05	0.89 (0.02)	8.93906e-05	0.89 (0.03)	0.0017259	0.59 (0.09)	0.000164	0.86 (0.02)	0.000113521	0.72 (0.08)	0.000822833	0.73 (0.1)	0.000403133	0.48 (0.11)	0.00150277	0.82 (0.04)	0.000188283	0.72 (0.19)	-6.61667e-05	0.78 (0.05)	0.00052738
CLK1	P538	0.00206334	0.17 (0.11)	0.000422	0.3 (0.08)	0.000349046	0.24 (0.1)	0.00081773	0.1 (0.11)	0.000276	0.45 (0.08)	0.00416366	0.18 (0.06)	0.00164025	0.13 (0.02)	0.00148283	0.14 (0.06)	0.00227168	0.21 (0.04)	0.0011434	0.19 (0.06)	0.000471333	0.21 (0.05)	0.00208251
COL18A1	P365	0.000347738	0.06 (0.02)	2.35e-05	0.06 (0.03)	2.25011e-05	0.05 (0.02)	9.79103e-05	0.03 (0)	0.00025	0.06 (0.03)	7.87304e-06	0.07 (0.03)	-1.57381e-06	0.08 (0.02)	0.000104967	0.07 (0.04)	4.92985e-07	0.11 (0.06)	-0.000295238	0.09 (0.02)	-5.25e-05	0.09 (0.02)	0.00146848
COL18A1	P494	0.000232462	0.35 (0.09)	6.85e-05	0.08 (0.02)	0.000181194	0.11 (0.08)	0.000281961	0.52 (0.07)	0.000263	0.19 (0.06)	8.31918e-05	0.1 (0.03)	0.00109801	0.28 (0.09)	-3.01667e-05	0.36 (0.12)	3.96703e-05	0.37 (0.08)	0.000170219	0.33 (0.02)	0.000247	0.35 (0.07)	0.000352732
COL1A1	P117	0.000238359	0.27 (0.1)	-6.18333e-05	0.22 (0.09)	3.81029e-06	0.25 (0.08)	3.62873e-05	0.17 (0.12)	3.2e-05	0.24 (0.06)	4.14985e-06	0.16 (0.06)	0.000618588	0.23 (0.04)	0.000338633	0.29 (0.08)	-5.319e-06	0.31 (0.08)	-5.13544e-05	0.26 (0.04)	-4e-06	0.33 (0.06)	0.00081896
COL1A1	P5	0.00057003	0.23 (0.04)	0.000509167	0.37 (0.1)	8.92701e-05	0.15 (0.08)	0.00126942	0.04 (0)	0.00048	0.18 (0.07)	0.000117919	0.22 (0.11)	0.000496794	0.23 (0.08)	0.0003209	0.27 (0.14)	-5.12229e-05	0.35 (0.11)	-0.000342657	0.32 (0.14)	-5.36667e-05	0.4 (0.09)	0.00176786
COL1A2	E299	0.00135437	0.06 (0.02)	0.000229833	0.05 (0.01)	6.79869e-05	0.08 (0.03)	0.000635813	0.04 (0.01)	0.000182	0.04 (0.01)	0.000104504	0.07 (0.03)	0.000609027	0.12 (0.01)	0.0010505	0.81 (0.08)	0.0116965	0.14 (0.1)	0.00110546	0.14 (0.11)	0.000144833	0.08 (0.03)	0.000635946
COL1A2	P407	0.000258217	0.4 (0.13)	6.03333e-05	0.52 (0.17)	4.43443e-06	0.49 (0.12)	0.000153256	0.33 (0.13)	4.3e-05	0.37 (0.08)	9.41918e-05	0.48 (0.13)	-4.87317e-05	0.53 (0.08)	0.000359967	0.76 (0.07)	0.00157339	0.52 (0.11)	0.000222373	0.5 (0.12)	-9e-05	0.43 (0.08)	0.000216036
COL1A2	P48	0.00139621	0.07 (0.03)	0.0001625	0.04 (0.04)	5.71285e-05	0.07 (0.04)	0.000642318	0.04 (0.01)	8.8e-05	0.03 (0.01)	0.000227651	0.07 (0.04)	0.000661234	0.11 (0.04)	0.0005426	0.72 (0.09)	0.0119065	0.13 (0.11)	0.000342089	0.11 (0.06)	0.000180667	0.07 (0.03)	0.000928551
COL4A3	E205	6.17795e-05	0.03 (0.01)	1.63333e-05	0.02 (0.01)	9.04459e-06	0.02 (0.01)	0.000294109	0.03 (0)	-3e-06	0.02 (0.01)	1.43708e-05	0.03 (0.01)	9.0023e-05	0.03 (0.01)	-3.43333e-06	0.03 (0.01)	-1.89675e-06	0.04 (0.01)	8.85854e-05	0.03 (0.01)	-3.71667e-05	0.03 (0.01)	0.000112635
COL4A3	P545	6.29411e-05	0.05 (0.01)	6.15e-05	0.03 (0.02)	4.08885e-05	0.03 (0.01)	0.00011731	0.04 (0.01)	-3.8e-05	0.04 (0.01)	8.66314e-06	0.03 (0.01)	0.000191966	0.04 (0.01)	-4.62333e-05	0.11 (0.07)	5.97659e-05	0.06 (0.01)	0.000147621	0.04 (0.01)	-1.08333e-05	0.05 (0.01)	8.15085e-05
COL6A1	P283	5.13169e-05	0.02 (0.01)	-8.5e-06	0.01 (0)	0.000171054	0.02 (0.01)	3.67929e-05	0.03 (0)	6.4e-05	0.02 (0.01)	6.07179e-06	0.02 (0.01)	4.28119e-05	0.02 (0)	0.000111	0.02 (0.01)	1.86627e-05	0.02 (0)	-3.28644e-05	0.02 (0)	-4.25e-05	0.02 (0)	8.14894e-05
COL6A1	P425	0.00105549	0.22 (0.02)	0.000228667	0.07 (0.02)	0.0032978	0.09 (0.07)	0.000617348	0.22 (0.04)	-3e-06	0.21 (0.03)	0.00114522	0.09 (0.02)	0.00232957	0.19 (0.06)	-0.000161433	0.27 (0.06)	8.80661e-05	0.29 (0.05)	0.00100439	0.23 (0.02)	0.000236833	0.24 (0.04)	0.000272662
COMT	E401	0.00171037	0.19 (0.08)	0.000173667	0.06 (0.04)	0.000853182	0.14 (0.06)	0.00108943	0.22 (0.19)	-0.000146	0.24 (0.05)	0.000114509	0.11 (0.02)	0.00213574	0.25 (0.08)	0.000238933	0.8 (0.07)	0.0114501	0.38 (0.09)	0.00161893	0.22 (0.04)	0.000375	0.29 (0.07)	0.00126671
COPG2	P298	0.00146723	0.03 (0.01)	0.000404	0.1 (0.01)	0.00341291	0.09 (0.03)	0.00033541	0.03 (0)	0.000226	0.03 (0.02)	0.00100673	0.13 (0.02)	0.00780561	0.03 (0)	0.0007201	0.03 (0.01)	0.000195723	0.03 (0.01)	2.25389e-06	0.03 (0.01)	0.000201167	0.03 (0.01)	0.00133885
CPA4	E20	0.00294095	0.47 (0.13)	0.000675333	0.81 (0.02)	0.00611112	0.55 (0.1)	0.00253723	0.3 (0.22)	0.000399	0.79 (0.05)	0.00256353	0.33 (0.12)	0.00298018	0.48 (0.06)	0.00144297	0.23 (0.09)	0.00366752	0.54 (0.1)	0.00103321	0.58 (0.07)	0.000628333	0.57 (0.11)	0.00281495
CPA4	P1265	8.11306e-05	0.93 (0.01)	0.0004075	0.94 (0.01)	6.59142e-06	0.94 (0.01)	4.055e-05	0.95 (0.02)	2.1e-05	0.94 (0.02)	3.37712e-06	0.93 (0.01)	0.000271042	0.94 (0.01)	0.0005298	0.94 (0.02)	-6.00766e-07	0.95 (0.01)	0.000384458	0.95 (0)	0.000193167	0.95 (0.01)	5.0468e-06
CPA4	P961	0.0012148	0.81 (0.04)	0.0001615	0.93 (0.01)	0.00336777	0.92 (0.06)	0.00114842	0.84 (0.05)	-7.3e-05	0.76 (0.04)	0.00128485	0.92 (0.01)	0.00358348	0.8 (0.08)	0.000102533	0.78 (0.04)	0.000218801	0.8 (0.03)	0.00046177	0.85 (0.01)	0.000371833	0.83 (0.04)	0.000500548
CPNE1	P138	0.000200923	0.12 (0.05)	3.51667e-05	0.02 (0.01)	0.000546383	0.04 (0.03)	0.000141095	0.13 (0.14)	-5.3e-05	0.11 (0.03)	0.000108229	0.04 (0.01)	0.000783626	0.1 (0.03)	5.15667e-05	0.15 (0.07)	1.72169e-05	0.12 (0.03)	0.000117118	0.1 (0.02)	7.71667e-05	0.1 (0.02)	0.000137176
CREB1	P819	0.000110461	0.15 (0.07)	2.16667e-05	0.04 (0.02)	7.61846e-05	0.32 (0.13)	0.000791313	0.04 (0)	0.000185	0.11 (0.07)	4.0437e-07	0.13 (0.06)	-3.2119e-05	0.25 (0.1)	0.0001214	0.08 (0.06)	1.18135e-05	0.15 (0.07)	-5.44877e-05	0.12 (0.05)	-2.65e-05	0.14 (0.04)	0.000227226
CREBBP	P712	0.000626022	0.86 (0.03)	-6.81667e-05	0.9 (0.02)	0.000645979	0.84 (0.04)	0.000106318	0.68 (0.16)	0.000121	0.76 (0.07)	0.000857291	0.75 (0.11)	0.000527628	0.83 (0.08)	-0.000127333	0.87 (0.05)	7.96305e-05	0.84 (0.05)	-0.000113589	0.86 (0.04)	-0.000137667	0.88 (0.03)	0.00119763
CRIP1	P274	0.00167239	0.51 (0.09)	2.3e-05	0.51 (0.08)	0.000327686	0.46 (0.1)	0.000533855	0.55 (0.14)	-0.000221	0.37 (0.07)	0.00093645	0.52 (0.05)	0.000983008	0.47 (0.12)	0.000194367	0.52 (0.13)	0.000113457	0.62 (0.08)	-0.000268325	0.54 (0.02)	0.00103933	0.64 (0.05)	0.00533057
CRIP1	P874	0.000128287	0.13 (0.07)	-4.35e-05	0.17 (0.05)	4.9606e-06	0.21 (0.06)	0.000106303	0.08 (0.05)	4.6e-05	0.13 (0.04)	1.28695e-05	0.38 (0.15)	0.000720578	0.17 (0.05)	-9.16667e-06	0.06 (0.04)	0.000274825	0.19 (0.13)	-7.35472e-05	0.16 (0.06)	-5.9e-05	0.17 (0.07)	0.000240421
CRK	P721	0.000249417	0.46 (0.07)	0.0001865	0.51 (0.13)	1.7518e-05	0.6 (0.12)	0.000386803	0.19 (0.2)	0.000203	0.44 (0.11)	1.99081e-05	0.42 (0.12)	2.39413e-05	0.39 (0.11)	8.67e-05	0.1 (0.06)	0.00196977	0.33 (0.09)	0.000104608	0.28 (0.05)	0.000317833	0.32 (0.1)	8.06736e-05
CSF1	P217	0.000176844	0.07 (0.04)	-0.00011	0.1 (0.02)	3.17962e-05	0.16 (0.05)	0.000827083	0.04 (0)	0.000175	0.11 (0.06)	3.16436e-06	0.13 (0.02)	0.000791045	0.09 (0.03)	-7.76667e-05	0.08 (0.06)	4.57691e-06	0.06 (0.03)	0.000146253	0.06 (0.01)	0.000163	0.06 (0.02)	0.000291342
CSF1	P339	0.000172188	0.03 (0.01)	2.51667e-05	0.02 (0)	5.06047e-05	0.2 (0.1)	0.00275543	0.02 (0)	5.4e-05	0.04 (0.01)	2.97372e-06	0.02 (0.01)	0.000263125	0.04 (0.02)	-0.000107267	0.06 (0.06)	-1.32212e-05	0.03 (0.01)	-4.67395e-06	0.03 (0.02)	2.03333e-05	0.03 (0.01)	2.39444e-05
CSF1R	E26	0.000641003	0.91 (0.05)	-6.5e-05	0.79 (0.07)	0.000388683	0.95 (0.02)	0.000990409	0.86 (0.08)	-2.8e-05	0.8 (0.06)	0.00031903	0.9 (0.05)	8.67944e-05	0.94 (0.01)	0.000715067	0.79 (0.07)	0.000719293	0.94 (0.03)	0.00063435	0.89 (0.03)	0.000116	0.93 (0.02)	0.00132072
CSF1R	P73	0.000166828	0.56 (0.1)	-2.26667e-05	0.74 (0.03)	0.000306537	0.56 (0.11)	9.71706e-05	0.38 (0.36)	1.9e-05	0.72 (0.06)	0.000157201	0.4 (0.13)	0.000372318	0.6 (0.13)	-4.73333e-05	0.38 (0.09)	0.000261961	0.58 (0.06)	8.14983e-05	0.52 (0.07)	0.000122667	0.6 (0.06)	0.000122515
CSF2	E248	0.000552761	0.92 (0.02)	-0.000181167	0.92 (0.01)	2.60183e-05	0.92 (0.02)	0.000293371	0.91 (0.02)	-2.7e-05	0.94 (0.02)	4.23456e-05	0.91 (0.02)	2.02683e-05	0.94 (0.01)	0.0009793	0.94 (0.03)	0.000295375	0.92 (0.03)	-0.000385775	0.94 (0.01)	0.000912167	0.89 (0.04)	0.00196953
CSF2	P605	0.00174167	0.88 (0.03)	-0.000591	0.91 (0.01)	0.000787044	0.89 (0.02)	0.00145533	0.9 (0.01)	0.000414	0.89 (0.02)	2.78077e-05	0.9 (0.01)	0.00182364	0.88 (0.03)	-0.000149067	0.92 (0.03)	0.0013009	0.87 (0.04)	-0.00100821	0.91 (0.01)	0.00148733	0.83 (0.05)	0.005661
CSF3	E242	0.00121961	0.91 (0.02)	0.001521	0.76 (0.06)	0.000131551	0.93 (0.02)	0.00502393	0.89 (0.05)	-0.000127	0.77 (0.05)	0.000152183	0.88 (0.04)	0.000260605	0.92 (0.02)	0.004086	0.93 (0.04)	0.002904	0.87 (0.04)	8.34996e-06	0.87 (0.03)	0.00100283	0.82 (0.05)	0.00179357
CSF3	P309	0.000262424	0.65 (0.05)	0.000185833	0.59 (0.08)	1.54765e-05	0.61 (0.08)	3.57278e-05	0.23 (0.26)	0.000183	0.57 (0.11)	7.34569e-06	0.32 (0.15)	0.000518994	0.74 (0.04)	0.00156957	0.76 (0.06)	0.000418591	0.56 (0.15)	7.36657e-05	0.52 (0.14)	-1.16667e-05	0.47 (0.09)	0.00055996
CSF3R	P472	0.000418429	0.84 (0.04)	0.000593167	0.44 (0.12)	0.000110597	0.84 (0.06)	0.000922328	0.83 (0.06)	3e-06	0.47 (0.13)	9.91826e-05	0.74 (0.14)	2.53389e-05	0.87 (0.02)	0.0023331	0.57 (0.1)	0.000361641	0.81 (0.05)	0.000409097	0.83 (0.08)	0.000646833	0.73 (0.1)	0.00068112
CSF3R	P8	0.000589735	0.5 (0.13)	0.000305333	0.28 (0.08)	5.84284e-05	0.82 (0.11)	0.00344961	0.5 (0.28)	-0.000133	0.18 (0.05)	0.00021531	0.52 (0.12)	0.000522266	0.6 (0.09)	0.000848533	0.16 (0.06)	0.00112355	0.49 (0.11)	0.000386805	0.61 (0.21)	0.0005005	0.39 (0.11)	0.000564611
			Bladder (n=5)		Blood (n=30)		Brain (n=12)		Cervix (n=3)		Infant blood (n=55)		Head and neck (n=11)		Kidney (n=6)		Placenta (n=19)		Pleura (n=18)		Small intestine (n=5)		Lung (n=53)
GENE	CpG	Mean decrease in accuracy	Mean (sd)	Decrease in accuracy	Mean (sd)	Decrease in accuracy	Mean (sd)	Decrease in accuracy	Mean (sd)	Decrease in accuracy	Mean (sd)	Decrease in accuracy	Mean (sd)	Decrease in accuracy	Mean (sd)	Decrease in accuracy	Mean (sd)	Decrease in accuracy	Mean (sd)	Decrease in accuracy	Mean (sd)	Decrease in accuracy	Mean (sd)	Decrease in accuracy
CSK	P740	8.54859e-05	0.24 (0.09)	-1.31667e-05	0.1 (0.08)	5.25569e-06	0.11 (0.09)	2.85271e-05	0.07 (0.02)	0.000172	0.17 (0.07)	3.22393e-06	0.09 (0.04)	0.000150395	0.19 (0.06)	2.92e-05	0.26 (0.14)	6.68222e-06	0.24 (0.07)	0.000138276	0.18 (0.09)	3.43333e-05	0.19 (0.04)	0.000238468
CSPG2	E38	0.000353131	0.23 (0.06)	9e-06	0.05 (0.04)	0.000290636	0.04 (0.06)	0.000848202	0.21 (0.16)	-0.000136	0.25 (0.08)	9.66859e-05	0.05 (0.03)	0.0014967	0.23 (0.1)	-8.46667e-06	0.16 (0.08)	6.6211e-06	0.28 (0.07)	0.000872662	0.25 (0.12)	-7.51667e-05	0.21 (0.06)	0.000418677
CSPG2	P82	0.000118724	0.17 (0.04)	8.83333e-06	0.1 (0.04)	3.5232e-05	0.1 (0.04)	0.000120814	0.03 (0)	0.000256	0.16 (0.05)	-1.18946e-06	0.11 (0.04)	0.000184555	0.15 (0.04)	-1.80667e-05	0.18 (0.11)	-9.33824e-06	0.19 (0.06)	-2.6214e-05	0.18 (0.08)	-0.0001015	0.2 (0.04)	0.000396511
CSTB	E410	0.00136906	0.06 (0.01)	0.000670667	0.02 (0)	0.0014558	0.03 (0.01)	0.00320567	0.04 (0.01)	0.000932	0.08 (0.03)	0.000117059	0.03 (0.01)	0.00433828	0.05 (0.01)	0.00119163	0.13 (0.07)	0.000459455	0.1 (0.04)	0.00286799	0.05 (0.01)	0.000466167	0.07 (0.03)	0.00161037
CTGF	E156	8.82452e-05	0.04 (0.01)	0.000137833	0.03 (0.01)	1.71397e-05	0.03 (0.01)	0.000180742	0.12 (0.14)	-4e-05	0.04 (0.02)	7.7259e-06	0.05 (0.02)	1.36825e-05	0.05 (0.02)	-0.000111267	0.18 (0.17)	2.25123e-05	0.07 (0.02)	0.000503964	0.05 (0.01)	2.13333e-05	0.06 (0.03)	0.000125668
CTGF	P693	0.00136302	0.87 (0.06)	0.000184333	0.97 (0)	0.0035365	0.86 (0.07)	0.00114878	0.88 (0.05)	0.000122	0.96 (0.01)	0.000791907	0.87 (0.05)	0.00126763	0.77 (0.12)	0.0019004	0.67 (0.1)	0.00184933	0.89 (0.03)	0.000802124	0.93 (0.01)	0.000615	0.89 (0.04)	0.00101426
CTLA4	E176	3.172e-05	0.9 (0.02)	-2.68333e-05	0.88 (0.02)	5.98027e-06	0.92 (0.01)	0.000218667	0.85 (0.03)	3e-05	0.87 (0.03)	2.25075e-05	0.89 (0.03)	-2.4827e-05	0.91 (0.02)	3.26333e-05	0.91 (0.01)	4.32921e-05	0.88 (0.03)	2.60226e-06	0.92 (0.02)	0.000175333	0.88 (0.03)	2.09891e-05
CTLA4	P1128	9.16675e-05	0.88 (0.03)	-9.4e-05	0.89 (0.02)	4.16249e-06	0.92 (0.02)	0.000569045	0.81 (0.06)	0.000152	0.89 (0.02)	8.11271e-06	0.86 (0.01)	0.000804016	0.87 (0.05)	4.66667e-07	0.81 (0.09)	4.48463e-05	0.89 (0.02)	-2.23431e-05	0.91 (0.01)	0.000383	0.89 (0.03)	4.40964e-05
CTNNA1	P185	0.000132977	0.03 (0.01)	3.35e-05	0.01 (0)	0.000119704	0.02 (0.01)	0.000134522	0.03 (0.01)	5.2e-05	0.03 (0.01)	1.52072e-05	0.02 (0)	0.000393778	0.04 (0.01)	0.000141233	0.05 (0.03)	1.44551e-05	0.04 (0.01)	-2.73091e-05	0.04 (0.01)	0.000169833	0.04 (0.01)	0.000306025
CTNNA1	P382	0.000146778	0.09 (0.02)	0.000232833	0.03 (0.01)	0.000195074	0.04 (0.02)	4.25571e-05	0.06 (0.03)	-9.1e-05	0.06 (0.02)	3.45361e-05	0.04 (0.01)	0.00114158	0.07 (0.01)	0.000260267	0.11 (0.05)	2.58506e-05	0.1 (0.03)	0.000192709	0.08 (0.02)	2.03333e-05	0.08 (0.02)	8.41908e-05
CTNNB1	P757	9.69321e-05	0.11 (0.07)	-8.41667e-05	0.05 (0.01)	0.000102659	0.07 (0.04)	-1.37452e-05	0.17 (0.12)	-2.8e-05	0.07 (0.03)	6.17451e-06	0.12 (0.04)	0.000144987	0.1 (0.02)	1.57333e-05	0.11 (0.05)	1.14615e-05	0.11 (0.05)	-1.0076e-05	0.1 (0.03)	0.000195833	0.08 (0.02)	0.00030536
CTSD	P726	0.000916523	0.72 (0.03)	0.000305333	0.67 (0.11)	0.00014396	0.48 (0.11)	0.00107024	0.73 (0.18)	-0.000206	0.83 (0.04)	0.00179002	0.62 (0.11)	0.000573331	0.73 (0.09)	-5.02333e-05	0.65 (0.15)	-9.06168e-06	0.69 (0.09)	-0.000247746	0.69 (0.03)	0.000184167	0.62 (0.06)	0.0016154
CTSH	E157	0.000738364	0.05 (0.02)	0.000191833	0.12 (0.01)	0.000892572	0.1 (0.03)	-0.000348936	0.04 (0)	0.000187	0.04 (0.02)	0.000264777	0.15 (0.02)	0.00969573	0.06 (0.02)	0.000394733	0.06 (0.03)	9.97768e-06	0.06 (0.02)	0.000150456	0.05 (0.01)	0.000181833	0.05 (0.01)	0.00044216
CTSH	P238	4.53978e-05	0.12 (0.06)	0.000219833	0.04 (0.02)	1.25341e-05	0.03 (0.01)	7.13802e-05	0.08 (0.09)	-5.6e-05	0.05 (0.02)	5.34901e-06	0.06 (0.02)	4.28413e-06	0.07 (0.03)	-5.87333e-05	0.07 (0.04)	-1.98413e-06	0.08 (0.02)	2.97521e-05	0.06 (0.02)	-2.8e-05	0.07 (0.02)	0.000135364
CTSL	P264	0.000122005	0.31 (0.1)	-0.000118167	0.48 (0.1)	2.98119e-05	0.15 (0.07)	0.000552525	0.58 (0.22)	5.7e-05	0.42 (0.06)	6.90579e-05	0.32 (0.08)	-3.75262e-05	0.18 (0.11)	0.000214867	0.1 (0.07)	0.000504338	0.39 (0.13)	4.1556e-05	0.32 (0.08)	-4.65e-05	0.36 (0.09)	7.74052e-05
CTSL	P81	6.22453e-05	0.04 (0.01)	-5.71667e-05	0.04 (0.02)	2.22914e-06	0.03 (0.01)	0.000467293	0.04 (0.01)	1e-06	0.04 (0.01)	5.97507e-06	0.07 (0.06)	2.15587e-05	0.05 (0.01)	7.97e-05	0.05 (0.01)	9.54716e-06	0.05 (0.02)	-3.28877e-06	0.05 (0.03)	-1.23333e-05	0.05 (0.02)	0.000123127
CTTN	E29	7.90197e-05	0.1 (0.05)	-6.8e-05	0.04 (0.01)	9.53714e-05	0.05 (0.02)	8.98325e-05	0.05 (0.02)	7.9e-05	0.08 (0.05)	7.28481e-07	0.06 (0.02)	7.39905e-05	0.09 (0.02)	4.90667e-05	0.15 (0.11)	9.06263e-06	0.12 (0.04)	0.000455808	0.11 (0.01)	0.000192667	0.09 (0.03)	5.79418e-05
CXCL9	E268	0.000524959	0.85 (0.04)	0.000271667	0.93 (0.03)	9.58241e-05	0.92 (0.01)	0.00343209	0.66 (0.2)	0.000263	0.91 (0.02)	0.000106578	0.74 (0.13)	0.0019325	0.82 (0.04)	0.000911767	0.74 (0.1)	0.000474279	0.87 (0.03)	0.000139107	0.81 (0.14)	7.91667e-05	0.84 (0.04)	0.000523519
CYP1A1	P382	5.64599e-05	0.04 (0.02)	-2.55e-05	0.04 (0.01)	2.86425e-05	0.03 (0.01)	0.00013491	0.04 (0.01)	3.7e-05	0.05 (0.03)	1.13248e-06	0.05 (0.01)	1.06024e-05	0.07 (0.02)	1.4e-05	0.08 (0.06)	1.07287e-06	0.06 (0.03)	-8.43969e-05	0.05 (0.02)	-6.21667e-05	0.05 (0.01)	0.00021514
CYP1B1	E83	0.000215819	0.29 (0.07)	5.28333e-05	0.04 (0.05)	0.000126261	0.12 (0.18)	0.000119024	0.06 (0.02)	0.000192	0.18 (0.08)	1.79342e-05	0.07 (0.04)	0.000655723	0.2 (0.05)	0.000109533	0.31 (0.15)	2.26129e-05	0.33 (0.14)	0.000489823	0.2 (0.07)	-5.21667e-05	0.23 (0.08)	0.000428543
CYP1B1	P212	0.000629989	0.33 (0.04)	0.000275333	0.13 (0.03)	0.000471403	0.11 (0.08)	0.00126634	0.33 (0.1)	8e-06	0.27 (0.04)	0.000230091	0.12 (0.04)	0.00373028	0.31 (0.04)	0.000590233	0.34 (0.1)	5.52204e-05	0.4 (0.08)	0.000552904	0.38 (0.04)	0.000397333	0.37 (0.05)	0.000705862
CYP2E1	E53	0.000494565	0.89 (0.02)	9.3e-05	0.91 (0.03)	4.264e-05	0.86 (0.04)	0.000272608	0.87 (0.06)	-9e-06	0.87 (0.04)	3.245e-05	0.82 (0.09)	-0.000342997	0.87 (0.06)	0.000161133	0.52 (0.16)	0.0043894	0.89 (0.04)	0.000178065	0.91 (0.02)	0.000172667	0.87 (0.04)	0.000378789
CYP2E1	P416	0.000159126	0.94 (0.01)	6.11667e-05	0.96 (0.01)	9.96981e-05	0.93 (0.02)	-3.44151e-05	0.76 (0.2)	0.000197	0.94 (0.02)	9.35882e-06	0.73 (0.19)	0.00161233	0.94 (0.02)	0.0001398	0.81 (0.11)	0.000254786	0.94 (0.02)	2.19833e-05	0.95 (0.01)	8.3e-05	0.93 (0.02)	0.000125438
DAB2	P35	0.000130073	0.03 (0.01)	8.83333e-06	0.02 (0.02)	3.95542e-05	0.02 (0.01)	0.000471425	0.03 (0)	5e-05	0.03 (0.01)	1.54911e-05	0.04 (0.03)	-7.96111e-06	0.04 (0.01)	7.19333e-05	0.04 (0.01)	2.82709e-05	0.05 (0.02)	-9.24465e-05	0.04 (0.01)	5.83333e-06	0.04 (0.01)	0.000389058
DAB2	P468	9.07427e-05	0.04 (0.02)	-3.3e-05	0.03 (0.01)	1.98755e-05	0.03 (0)	0.000711025	0.08 (0.09)	-4.7e-05	0.03 (0.01)	2.08754e-06	0.07 (0.03)	0.0012019	0.03 (0.01)	-3.28e-05	0.04 (0.02)	5.77116e-06	0.04 (0.01)	-2.38388e-05	0.03 (0.01)	-1.43333e-05	0.03 (0.01)	3.65135e-06
DAB2IP	E18	0.00119303	0.15 (0.05)	0.0001835	0.05 (0.01)	0.000685115	0.05 (0.03)	0.00109644	0.16 (0.09)	3.2e-05	0.13 (0.04)	0.000144277	0.06 (0.02)	0.00119628	0.14 (0.06)	0.0001664	0.6 (0.11)	0.00859612	0.19 (0.04)	0.000548109	0.18 (0.12)	-0.000255333	0.15 (0.04)	0.000704011
DAB2IP	P9	0.000642186	0.04 (0.01)	7.56667e-05	0.03 (0)	5.27135e-05	0.03 (0.01)	0.000457922	0.04 (0.01)	5.1e-05	0.05 (0.02)	2.17313e-05	0.04 (0.01)	0.000339599	0.05 (0.01)	0.000250167	0.51 (0.18)	0.00579838	0.05 (0.02)	0.000149238	0.06 (0.06)	-0.000147667	0.04 (0.01)	0.000280121
DAPK1	E46	2.56129e-05	0.21 (0.05)	-4.08333e-05	0.19 (0.04)	2.98309e-06	0.13 (0.06)	9.15127e-05	0.04 (0.01)	0.000224	0.2 (0.05)	8.23377e-07	0.21 (0.06)	4.98333e-06	0.24 (0.06)	-1.96667e-06	0.18 (0.09)	2.08447e-06	0.26 (0.03)	6.9986e-05	0.21 (0.06)	-2.71667e-05	0.24 (0.06)	4.68181e-05
DAPK1	P10	0.00011136	0.07 (0.03)	-6.46667e-05	0.04 (0.02)	2.29041e-05	0.04 (0.02)	8.92706e-05	0.04 (0.01)	0.000149	0.07 (0.03)	3.14123e-07	0.08 (0.07)	3.71905e-05	0.08 (0.03)	-2.86667e-05	0.12 (0.05)	2.55159e-06	0.1 (0.03)	-7.81629e-05	0.1 (0.03)	3.23333e-05	0.1 (0.03)	0.000431284
DAPK1	P345	2.26095e-05	0.08 (0.04)	-3.43333e-05	0.03 (0.01)	1.63716e-05	0.02 (0.01)	0.000125058	0.07 (0.07)	-3e-06	0.05 (0.03)	2.19962e-06	0.07 (0.06)	-2.63381e-05	0.05 (0.03)	-2.15333e-05	0.06 (0.04)	-3.24108e-06	0.07 (0.02)	7.83502e-05	0.08 (0.04)	3.41667e-05	0.06 (0.02)	3.84608e-05
DBC1	E204	0.000214637	0.22 (0.05)	5.11667e-05	0.22 (0.06)	2.89186e-05	0.08 (0.07)	0.00171918	0.16 (0.18)	9.6e-05	0.13 (0.05)	6.59787e-05	0.28 (0.16)	0.000182965	0.16 (0.06)	-7e-06	0.51 (0.18)	0.000207596	0.23 (0.05)	2.94648e-05	0.28 (0.18)	-3.66667e-06	0.26 (0.07)	0.000285816
DBC1	P351	0.000168658	0.05 (0.02)	-4.18333e-05	0.08 (0.04)	0.000107862	0.04 (0.04)	0.000552985	0.03 (0)	0.000163	0.03 (0.02)	0.000133329	0.12 (0.07)	0.000535021	0.05 (0.02)	-5.56667e-06	0.11 (0.1)	-1.51486e-06	0.12 (0.11)	0.000184147	0.15 (0.2)	1.66667e-05	0.09 (0.05)	0.000197251
DCC	E53	0.000357288	0.29 (0.11)	3.8e-05	0.37 (0.08)	1.75097e-05	0.23 (0.05)	0.000774917	0.47 (0.23)	-1.2e-05	0.32 (0.09)	5.05087e-05	0.44 (0.07)	0.000351724	0.32 (0.08)	0.000146633	0.84 (0.1)	0.00280781	0.39 (0.11)	7.9525e-05	0.45 (0.21)	-0.000128667	0.37 (0.1)	0.000109973
DCC	P177	0.000125875	0.1 (0.05)	-3.18333e-05	0.07 (0.04)	8.75429e-06	0.04 (0.04)	0.000699255	0.04 (0.01)	0.000113	0.05 (0.06)	2.8675e-05	0.14 (0.08)	0.000104723	0.1 (0.04)	6.30667e-05	0.43 (0.21)	0.000280079	0.11 (0.04)	0.000113175	0.21 (0.21)	6.3e-05	0.12 (0.05)	0.00012645
DCC	P471	0.000120398	0.11 (0.05)	5.46667e-05	0.1 (0.03)	8.63089e-06	0.05 (0.01)	0.0014702	0.1 (0.1)	-9e-06	0.08 (0.03)	2.72712e-05	0.14 (0.06)	0.000183902	0.09 (0.03)	-8.95e-05	0.44 (0.26)	4.13952e-05	0.15 (0.08)	8.50012e-05	0.18 (0.12)	4.1e-05	0.13 (0.06)	5.53721e-05
DCN	P1320	2.09993e-05	0.88 (0.08)	0.00103033	0.96 (0.01)	5.32244e-06	0.94 (0.02)	-1.46825e-05	0.96 (0.01)	5e-06	0.95 (0.01)	1.37686e-06	0.95 (0.01)	-1.66857e-05	0.95 (0.01)	0.000126067	0.96 (0.02)	3.98608e-06	0.95 (0.01)	-9.81434e-06	0.95 (0.01)	-7.11667e-05	0.95 (0.02)	-1.42404e-06
DDB2	P407	0.000236928	0.21 (0.03)	0.000114667	0.12 (0.05)	1.48018e-05	0.13 (0.05)	5.77492e-05	0.2 (0.01)	7.1e-05	0.22 (0.05)	1.77646e-05	0.11 (0.06)	0.000303844	0.18 (0.04)	3.77333e-05	0.15 (0.05)	5.50553e-06	0.22 (0.05)	0.000380768	0.14 (0.03)	0.0002165	0.17 (0.03)	0.000690174
DDB2	P613	1.05928e-05	0.14 (0.04)	-1.33333e-05	0.2 (0.13)	8.32494e-07	0.2 (0.09)	2.54127e-06	0.1 (0.1)	-7e-06	0.27 (0.1)	2.05886e-05	0.15 (0.09)	5.35079e-06	0.19 (0.08)	-2.17667e-05	0.13 (0.06)	9.09214e-06	0.23 (0.12)	-2.13289e-05	0.2 (0.1)	-5.98333e-05	0.18 (0.08)	3.18234e-05
DDIT3	P1313	0.000253741	0.28 (0.08)	9.58333e-05	0.68 (0.08)	0.000285331	0.22 (0.15)	0.000229313	0.27 (0.15)	6.9e-05	0.65 (0.06)	0.000398603	0.35 (0.16)	7.9523e-05	0.2 (0.1)	0.0003337	0.35 (0.13)	0.000109741	0.49 (0.21)	5.90564e-05	0.32 (0.09)	0.000148	0.38 (0.1)	0.000280186
DDR1	E23	2.71855e-05	0.15 (0.04)	-6.5e-06	0.08 (0.02)	8.63015e-06	0.06 (0.04)	0.000104979	0.15 (0.12)	-4.3e-05	0.1 (0.03)	3.05397e-06	0.07 (0.02)	7.60405e-05	0.11 (0.04)	-2.88667e-05	0.13 (0.05)	-4.95005e-07	0.14 (0.04)	0.000158922	0.11 (0.03)	-7.35e-05	0.12 (0.03)	1.78734e-05
DDR1	P332	0.000916509	0.64 (0.07)	0.000137333	0.85 (0.05)	0.000503397	0.43 (0.08)	0.0023621	0.32 (0.17)	0.000445	0.64 (0.13)	7.41376e-05	0.39 (0.18)	0.00200234	0.42 (0.17)	0.000677567	0.25 (0.1)	0.00329912	0.71 (0.1)	0.000577996	0.59 (0.17)	4.9e-05	0.7 (0.12)	0.000856901
DDR2	E331	0.000142309	0.86 (0.06)	0.0003085	0.95 (0.01)	0.000101348	0.8 (0.11)	0.000955867	0.62 (0.49)	-5.7e-05	0.95 (0.01)	6.03458e-05	0.88 (0.07)	0.000127177	0.93 (0.01)	8.99333e-05	0.93 (0.02)	4.05142e-05	0.91 (0.02)	0.000364749	0.92 (0.02)	3.5e-05	0.93 (0.02)	6.86743e-05
DDR2	P743	0.000669303	0.73 (0.12)	0.0002615	0.93 (0.01)	0.00152909	0.71 (0.12)	0.000798879	0.73 (0.17)	4.3e-05	0.93 (0.03)	0.000641854	0.77 (0.12)	0.000722406	0.77 (0.07)	0.000365333	0.72 (0.08)	0.000814777	0.8 (0.04)	0.000528013	0.8 (0.05)	0.000200167	0.84 (0.06)	0.000328912
DES	E228	0.000140041	0.08 (0.01)	0.0004145	0.09 (0.03)	-9.83132e-07	0.06 (0.04)	0.000267893	0.07 (0.06)	2.9e-05	0.07 (0.02)	6.40469e-05	0.12 (0.04)	-1.22698e-05	0.1 (0.03)	0.000116	0.22 (0.09)	9.55083e-05	0.17 (0.09)	0.000926469	0.09 (0.01)	0.000253667	0.12 (0.04)	3.09905e-05
DES	P1006	6.55768e-05	0.78 (0.07)	9.03333e-05	0.89 (0.02)	6.80576e-05	0.87 (0.02)	0.000240048	0.49 (0.39)	0.000146	0.85 (0.03)	3.92407e-06	0.77 (0.07)	0.000273828	0.85 (0.05)	-5.66667e-07	0.84 (0.03)	3.79278e-06	0.83 (0.04)	-3.46178e-05	0.85 (0.04)	5.33333e-05	0.82 (0.04)	9.9333e-05
DHCR24	P406	0.000691302	0.08 (0.03)	0.000217167	0.01 (0)	0.00163213	0.02 (0.02)	0.000685938	0.03 (0)	0.000265	0.06 (0.02)	0.000443317	0.02 (0)	0.00304567	0.05 (0.02)	0.000229	0.1 (0.06)	8.19163e-05	0.08 (0.02)	0.000434188	0.06 (0.01)	0.000192667	0.06 (0.02)	0.0004172
DHCR24	P652	2.6352e-05	0.63 (0.03)	-1.66667e-05	0.59 (0.06)	1.76432e-06	0.53 (0.09)	6.64992e-05	0.44 (0.34)	-2.5e-05	0.63 (0.04)	6.45413e-06	0.55 (0.07)	0.000140574	0.6 (0.07)	9.69e-05	0.57 (0.07)	1.4433e-05	0.67 (0.04)	8.88888e-05	0.68 (0.03)	8.45e-05	0.66 (0.04)	-1.22227e-06
DIO3	E230	0.000165559	0.66 (0.07)	-6.53333e-05	0.75 (0.08)	2.39376e-05	0.47 (0.12)	0.000574866	0.5 (0.23)	1.5e-05	0.65 (0.05)	0.000105641	0.6 (0.11)	0.000188198	0.54 (0.12)	0.000908	0.82 (0.08)	8.06517e-05	0.73 (0.08)	-4.30439e-05	0.78 (0.07)	0.000263333	0.75 (0.06)	0.000239979
DIO3	P674	0.000406591	0.09 (0.03)	5.31667e-05	0.06 (0.03)	5.78762e-06	0.04 (0.05)	0.000224561	0.05 (0.01)	9.6e-05	0.03 (0.02)	8.77568e-05	0.07 (0.04)	2.68587e-05	0.06 (0.02)	-4.74667e-05	0.04 (0.01)	0.000368784	0.13 (0.11)	-0.000327221	0.07 (0.02)	-6.55e-05	0.11 (0.04)	0.00148628
DIO3	P90	0.00239879	0.36 (0.05)	0.000626	0.13 (0.02)	0.00459289	0.12 (0.08)	0.00609275	0.28 (0.11)	0.00013	0.41 (0.07)	0.00128543	0.16 (0.04)	0.00688904	0.41 (0.08)	0.000732967	0.5 (0.09)	0.000565988	0.53 (0.1)	0.0025519	0.35 (0.04)	0.000787	0.42 (0.06)	0.00193888
DIRAS3	E55	4.40576e-05	0.9 (0.01)	0.000186333	0.89 (0.01)	2.45558e-05	0.89 (0.02)	1.74143e-05	0.87 (0.03)	-1.1e-05	0.88 (0.03)	8.60624e-06	0.89 (0.01)	0.000106934	0.9 (0.02)	0.000110333	0.89 (0.03)	1.28043e-06	0.91 (0.01)	3.13472e-05	0.92 (0)	0.000985	0.9 (0.02)	1.04612e-05
DIRAS3	P745	2.99636e-05	0.77 (0.13)	8.83333e-06	0.8 (0.1)	-5.23782e-08	0.83 (0.02)	1.20714e-05	0.76 (0.11)	-4e-06	0.77 (0.04)	5.5481e-05	0.8 (0.04)	1.14571e-05	0.75 (0.11)	-7.3e-06	0.88 (0.07)	0.000116126	0.81 (0.05)	-1.90677e-05	0.84 (0.02)	9.66667e-06	0.82 (0.05)	1.86884e-05
DKFZP564O0823	E45	4.71176e-05	0.05 (0.01)	1.43333e-05	0.04 (0.01)	6.31883e-06	0.05 (0.02)	4.09206e-06	0.03 (0.01)	9.1e-05	0.04 (0.02)	3.5415e-06	0.05 (0.01)	4.31548e-05	0.05 (0.01)	-9.04333e-05	0.07 (0.03)	4.8326e-06	0.07 (0.02)	0.000257288	0.05 (0.01)	4.25e-05	0.06 (0.01)	8.94429e-05
DLC1	E276	0.000163129	0.53 (0.06)	0.000259	0.31 (0.11)	9.11645e-05	0.83 (0.15)	0.000261083	0.77 (0.05)	0.000178	0.34 (0.09)	0.000128668	0.65 (0.28)	1.8673e-05	0.74 (0.1)	0.000261333	0.48 (0.1)	4.08008e-05	0.69 (0.11)	0.000148592	0.7 (0.15)	7.58333e-05	0.63 (0.09)	0.000286184
DLC1	P695	0.000435503	0.62 (0.13)	0.000652833	0.76 (0.11)	6.3354e-06	0.82 (0.16)	0.000109684	0.77 (0.07)	2.5e-05	0.76 (0.06)	4.94102e-05	0.72 (0.11)	0.000237846	0.86 (0.03)	0.000808267	0.3 (0.12)	0.0031337	0.84 (0.06)	0.000272368	0.76 (0.02)	0.000377833	0.84 (0.06)	0.000259149
DLC1	P88	0.000102504	0.48 (0.07)	0.000362833	0.47 (0.12)	1.65528e-05	0.79 (0.07)	0.000482198	0.61 (0.15)	-2.8e-05	0.41 (0.1)	7.85015e-05	0.68 (0.14)	3.81817e-05	0.66 (0.09)	0.000231533	0.56 (0.16)	1.50381e-05	0.67 (0.08)	0.000248959	0.64 (0.1)	0.000142167	0.6 (0.08)	4.28508e-05
DLK1	E227	0.000177582	0.1 (0.05)	-6.63333e-05	0.06 (0.03)	4.78962e-06	0.04 (0.02)	0.000250693	0.04 (0.01)	0.000192	0.05 (0.02)	8.30224e-05	0.13 (0.08)	-1.62968e-05	0.09 (0.02)	2.95333e-05	0.41 (0.19)	0.000252843	0.17 (0.13)	0.000140966	0.28 (0.29)	-4.5e-06	0.14 (0.08)	0.000440554
DLL1	P386	0.000235077	0.03 (0.01)	0.000157	0.02 (0.01)	4.32997e-05	0.03 (0.01)	0.000663734	0.02 (0)	0.000162	0.06 (0.04)	1.89676e-06	0.03 (0)	0.000617328	0.03 (0.01)	0.0002076	0.11 (0.19)	1.51969e-05	0.06 (0.03)	0.00066113	0.03 (0.01)	4.28333e-05	0.03 (0.01)	0.000397392
DLL1	P832	0.000170214	0.15 (0.08)	2.03333e-05	0.17 (0.05)	1.6826e-05	0.12 (0.06)	0.000248325	0.09 (0.04)	0.000177	0.24 (0.1)	-4.2693e-06	0.24 (0.1)	-5.37611e-05	0.19 (0.12)	-6.9e-05	0.25 (0.2)	1.12964e-05	0.26 (0.09)	-9.90187e-05	0.28 (0.06)	4.61667e-05	0.31 (0.09)	0.000664866
DMP1	E194	9.786e-05	0.93 (0.01)	8.38333e-05	0.94 (0.01)	8.76124e-05	0.95 (0.03)	0.000769469	0.91 (0.05)	-2.5e-05	0.91 (0.02)	9.21608e-06	0.93 (0.01)	-4.76095e-05	0.91 (0.02)	8.41667e-05	0.9 (0.07)	2.00815e-06	0.91 (0.02)	8.1377e-05	0.93 (0.01)	4.75e-05	0.91 (0.02)	0.000117276
DMP1	P134	5.04527e-05	0.88 (0.02)	2e-06	0.91 (0.01)	4.27771e-05	0.91 (0.02)	7.9796e-05	0.92 (0)	0.000222	0.88 (0.03)	1.11481e-05	0.9 (0.02)	4.23619e-05	0.88 (0.04)	4.66e-05	0.8 (0.06)	0.000124921	0.86 (0.02)	0.000173705	0.9 (0.01)	8.95e-05	0.87 (0.03)	1.04976e-05
DNAJC15	E26	5.85877e-05	0.1 (0.04)	-3.85e-05	0.1 (0.05)	1.50463e-06	0.04 (0.01)	0.000923104	0.23 (0.28)	-5.7e-05	0.1 (0.03)	5.97769e-06	0.08 (0.03)	-9.7554e-05	0.08 (0.02)	4.7e-05	0.06 (0.02)	3.07354e-05	0.14 (0.07)	0.000203978	0.09 (0.06)	-5e-07	0.1 (0.04)	-2.75231e-05
DNAJC15	P65	0.000744556	0.87 (0.04)	0.000735833	0.93 (0.01)	4.62042e-05	0.55 (0.16)	0.00687099	0.9 (0.04)	-0.000144	0.91 (0.03)	9.30544e-06	0.88 (0.02)	0.00107615	0.86 (0.03)	0.0020618	0.88 (0.04)	0.000123242	0.93 (0.01)	0.00166056	0.87 (0.03)	0.0006795	0.92 (0.02)	0.00037123
DNMT1	P100	0.00155632	0.11 (0.05)	9.28333e-05	0.09 (0.04)	6.1149e-05	0.1 (0.03)	0.00070607	0.12 (0.09)	-1.9e-05	0.07 (0.04)	3.26539e-05	0.13 (0.03)	0.0016178	0.11 (0.04)	0.000434433	0.83 (0.06)	0.0120697	0.09 (0.03)	0.000237796	0.1 (0.03)	0.000501833	0.07 (0.02)	0.00148361
DNMT2	P199	0.000653315	0.85 (0.01)	0.000320667	0.92 (0.01)	0.000810258	0.69 (0.06)	0.00298876	0.84 (0.07)	-9.5e-05	0.89 (0.02)	3.74113e-05	0.84 (0.06)	0.000312785	0.76 (0.06)	0.00171697	0.91 (0.03)	0.0012461	0.84 (0.03)	0.000425692	0.88 (0.03)	5.63333e-05	0.84 (0.03)	0.00064575
DNMT3B	P352	0.00807016	0.18 (0.05)	0.00121967	0.21 (0.06)	0.00674479	0.1 (0.04)	0.00452686	0.05 (0.01)	0.00083	0.47 (0.09)	0.0189749	0.1 (0.04)	0.00454051	0.16 (0.03)	0.0024747	0.11 (0.05)	0.00590684	0.2 (0.05)	0.00125766	0.19 (0.06)	0.00116133	0.18 (0.05)	0.0047686
DSC2	E90	0.000164903	0.22 (0.09)	-4.66667e-06	0.27 (0.09)	1.50332e-05	0.12 (0.14)	0.000522147	0.23 (0.26)	-2.3e-05	0.22 (0.07)	2.27132e-05	0.21 (0.13)	8.46325e-05	0.21 (0.06)	0.000125567	0.18 (0.08)	0.000106509	0.36 (0.08)	0.000221337	0.29 (0.04)	3.36667e-05	0.37 (0.09)	0.000355723
DSC2	P407	0.000524085	0.89 (0.05)	0.0002235	0.94 (0.01)	7.72611e-05	0.91 (0.02)	0.000287925	0.9 (0.06)	-0.000265	0.92 (0.02)	1.15764e-05	0.83 (0.08)	0.00305906	0.9 (0.02)	0.000631333	0.85 (0.04)	0.0014829	0.94 (0.01)	0.00090242	0.93 (0.01)	6.98333e-05	0.93 (0.02)	0.000469716
DSG1	E292	0.000117975	0.9 (0.01)	-3.26667e-05	0.87 (0.02)	2.97217e-05	0.9 (0.02)	0.000135398	0.91 (0.03)	-1.2e-05	0.89 (0.02)	7.06746e-06	0.84 (0.06)	0.00158719	0.89 (0.03)	5.56333e-05	0.92 (0.04)	4.93215e-05	0.92 (0.02)	0.000155887	0.92 (0.01)	0.000396333	0.9 (0.02)	3.17184e-06
DSG1	P159	8.6793e-05	0.89 (0.02)	-2.83333e-06	0.88 (0.02)	5.58076e-06	0.91 (0.04)	0.000257685	0.84 (0.15)	-0.000124	0.89 (0.02)	6.42641e-06	0.71 (0.17)	0.00123733	0.88 (0.04)	-4.97667e-05	0.84 (0.08)	1.27202e-05	0.89 (0.02)	1.26554e-05	0.91 (0.02)	4.88333e-05	0.89 (0.02)	3.77848e-05
DSP	P36	0.000538237	0.26 (0.07)	3.98333e-05	0.05 (0.01)	0.00149625	0.11 (0.12)	0.000284706	0.24 (0.13)	-5e-06	0.23 (0.05)	0.000403903	0.06 (0.02)	0.00219014	0.24 (0.12)	-0.000143233	0.31 (0.1)	5.05948e-05	0.33 (0.08)	0.000277776	0.24 (0.06)	7.93333e-05	0.27 (0.07)	0.00033138
DSP	P440	0.000623855	0.06 (0.03)	7.23333e-05	0.02 (0.01)	5.88198e-05	0.05 (0.02)	2.82009e-05	0.03 (0)	5.4e-05	0.04 (0.03)	4.23836e-06	0.03 (0.01)	1.66024e-05	0.05 (0.02)	5.78e-05	0.04 (0.02)	-3.27639e-07	0.04 (0.01)	-0.000507522	0.04 (0.02)	-6.36667e-05	0.04 (0.01)	0.00274795
DST	E31	0.000197809	0.05 (0.02)	-7.45e-05	0.06 (0.01)	1.48555e-05	0.03 (0.02)	0.000511634	0.04 (0.02)	2.6e-05	0.05 (0.01)	1.23774e-05	0.04 (0.02)	0.000199221	0.06 (0.02)	-0.000120067	0.04 (0.02)	0.000204432	0.08 (0.03)	0.000184267	0.06 (0.01)	-6.5e-06	0.07 (0.01)	0.000500759
DST	P262	9.02463e-05	0.06 (0.01)	0.000148667	0.02 (0.01)	8.3235e-05	0.03 (0.01)	0.000273782	0.03 (0)	0.000132	0.06 (0.02)	3.50786e-06	0.03 (0.01)	0.000186454	0.07 (0.02)	3.04e-05	0.09 (0.04)	2.37014e-05	0.08 (0.03)	0.000342956	0.07 (0.02)	2.5e-06	0.06 (0.02)	6.21158e-05
DUSP4	E61	4.49623e-05	0.09 (0.04)	9.73333e-05	0.14 (0.05)	9.51824e-06	0.08 (0.06)	8.42397e-05	0.13 (0.16)	4.5e-05	0.1 (0.03)	2.10105e-05	0.11 (0.03)	-7.82302e-06	0.12 (0.05)	-3.58667e-05	0.16 (0.05)	2.89615e-06	0.16 (0.03)	8.27342e-05	0.13 (0.03)	-3.93333e-05	0.14 (0.03)	9.71514e-05
DUSP4	P925	0.000198162	0.03 (0.01)	-9.55e-05	0.02 (0)	9.28032e-05	0.02 (0.01)	9.3019e-05	0.03 (0)	5.7e-05	0.03 (0.01)	2.24457e-05	0.02 (0)	0.00081326	0.04 (0.01)	0.000190433	0.05 (0.02)	3.55221e-05	0.05 (0.01)	0.000460184	0.03 (0.01)	6.4e-05	0.04 (0.01)	0.00034373
E2F3	P840	0.000311453	0.06 (0.02)	-0.000120167	0.03 (0.01)	0.000169589	0.06 (0.01)	2.58881e-05	0.04 (0.01)	0.000165	0.07 (0.02)	7.7119e-06	0.07 (0.01)	0.000159703	0.06 (0.02)	-0.0001612	0.07 (0.03)	-4.50405e-06	0.08 (0.03)	0.000714244	0.06 (0.01)	-0.000118833	0.05 (0.01)	0.00093008
E2F5	P516	0.00141071	0.51 (0.12)	0.000218167	0.64 (0.09)	1.74473e-05	0.34 (0.11)	0.00503299	0.59 (0.19)	-0.000127	0.73 (0.06)	0.000113701	0.47 (0.11)	0.000902926	0.32 (0.11)	0.0049079	0.28 (0.15)	0.00401648	0.61 (0.08)	0.00111805	0.58 (0.14)	-3e-05	0.63 (0.07)	0.00196282
EDN1	E50	0.00111912	0.03 (0.01)	0.0001875	0.13 (0.01)	0.00354312	0.11 (0.04)	0.000728432	0.03 (0.01)	0.000114	0.02 (0.01)	0.00111781	0.11 (0.03)	0.00270615	0.03 (0.01)	0.000444233	0.04 (0.04)	0.000135169	0.03 (0.01)	9.31783e-05	0.03 (0)	0.000244	0.03 (0.01)	0.0005766
EDN1	P39	0.000838745	0.03 (0.01)	-0.000119833	0.01 (0)	0.00334823	0.02 (0.01)	0.000210776	0.03 (0)	7.7e-05	0.03 (0.01)	0.000793537	0.02 (0)	0.00113057	0.03 (0.01)	0.000223967	0.04 (0.01)	5.01638e-05	0.04 (0.01)	0.00019662	0.04 (0.01)	7.88333e-05	0.03 (0)	0.000347186
EDNRB	P148	0.00118569	0.94 (0.02)	0.000218667	0.97 (0)	0.00015088	0.96 (0.02)	0.000391851	0.96 (0.01)	9.9e-05	0.95 (0.01)	2.41359e-05	0.95 (0.01)	0.000634398	0.95 (0.01)	0.000397833	0.79 (0.09)	0.0108751	0.96 (0.01)	0.000499987	0.95 (0.01)	0.0001555	0.96 (0.01)	0.000609514
EDNRB	P709	0.00135447	0.95 (0.02)	0.0003105	0.96 (0.01)	6.57181e-05	0.97 (0)	0.00222049	0.95 (0.01)	3.9e-05	0.96 (0.01)	3.70431e-05	0.95 (0.01)	0.00158216	0.96 (0.01)	0.000485	0.67 (0.13)	0.0116193	0.96 (0.01)	0.000400248	0.95 (0.01)	0.000238167	0.96 (0.01)	0.000534343
			Bladder (n=5)		Blood (n=30)		Brain (n=12)		Cervix (n=3)		Infant blood (n=55)		Head and neck (n=11)		Kidney (n=6)		Placenta (n=19)		Pleura (n=18)		Small intestine (n=5)		Lung (n=53)
GENE	CpG	Mean decrease in accuracy	Mean (sd)	Decrease in accuracy	Mean (sd)	Decrease in accuracy	Mean (sd)	Decrease in accuracy	Mean (sd)	Decrease in accuracy	Mean (sd)	Decrease in accuracy	Mean (sd)	Decrease in accuracy	Mean (sd)	Decrease in accuracy	Mean (sd)	Decrease in accuracy	Mean (sd)	Decrease in accuracy	Mean (sd)	Decrease in accuracy	Mean (sd)	Decrease in accuracy
EFNA1	P591	2.70695e-05	0.05 (0.02)	1.08333e-05	0.03 (0.01)	2.43582e-05	0.04 (0.03)	9.4254e-06	0.03 (0)	6e-06	0.03 (0.02)	1.45684e-06	0.05 (0.03)	0.000198155	0.04 (0.01)	5.62667e-05	0.04 (0.01)	4.15556e-06	0.04 (0.01)	3.43456e-06	0.03 (0)	8.96667e-05	0.03 (0.01)	3.19932e-05
EFNA1	P7	7.16127e-05	0.03 (0.01)	-5.1e-05	0.02 (0.01)	3.2891e-05	0.02 (0.01)	3.9946e-05	0.03 (0)	-1.2e-05	0.03 (0.01)	9.02236e-06	0.03 (0.01)	9.87302e-07	0.03 (0.01)	-2.66333e-05	0.03 (0.01)	2.06905e-06	0.03 (0.01)	-0.000149761	0.03 (0.01)	-1.36667e-05	0.03 (0.01)	0.000330229
EFNB3	E17	1.3495e-05	0.6 (0.07)	-7.21667e-05	0.54 (0.04)	1.36579e-05	0.54 (0.07)	-1.63333e-06	0.73 (0.02)	0.000234	0.57 (0.06)	-6.54819e-08	0.53 (0.03)	6.36024e-05	0.6 (0.03)	4.29333e-05	0.64 (0.06)	2.27038e-05	0.58 (0.06)	-9.61544e-06	0.51 (0.06)	6.73333e-05	0.55 (0.05)	8.67363e-06
EFNB3	P442	0.000369657	0.18 (0.06)	-2.86667e-05	0.08 (0.02)	0.000330871	0.17 (0.04)	0.000130158	0.14 (0.04)	-1.4e-05	0.1 (0.03)	4.34675e-05	0.13 (0.03)	9.49429e-05	0.18 (0.03)	0.0001164	0.19 (0.07)	0.000118658	0.18 (0.05)	-0.000301623	0.16 (0.03)	-3.4e-05	0.18 (0.02)	0.00130866
EGF	E339	0.00151632	0.86 (0.09)	0.000115333	0.98 (0)	0.0075053	0.93 (0.03)	0.00068915	0.95 (0.03)	-0.000333	0.94 (0.01)	0.000439561	0.9 (0.05)	0.000577253	0.73 (0.1)	0.00265773	0.89 (0.03)	0.000706639	0.93 (0.03)	0.000330628	0.95 (0.01)	0.000272667	0.93 (0.02)	0.000737787
EGF	P242	9.18489e-05	0.85 (0.05)	0.000132667	0.9 (0.02)	1.18773e-05	0.93 (0.01)	0.000301274	0.9 (0.03)	-3.2e-05	0.9 (0.02)	5.50346e-06	0.92 (0.02)	0.000319993	0.84 (0.06)	0.000330267	0.91 (0.06)	8.93462e-05	0.88 (0.03)	3.15285e-05	0.89 (0.03)	2.38333e-05	0.89 (0.03)	0.00012617
EGF	P413	5.48888e-05	0.84 (0.05)	0.000185667	0.87 (0.03)	5.93476e-06	0.89 (0.02)	-4.44444e-06	0.89 (0.1)	9e-06	0.91 (0.02)	1.53292e-05	0.87 (0.04)	1.0769e-05	0.81 (0.05)	0.000767233	0.89 (0.05)	4.77128e-07	0.9 (0.02)	7.08036e-05	0.88 (0.02)	-2.33333e-06	0.88 (0.03)	8.45368e-05
EGFR	E295	0.000135355	0.03 (0.01)	-1.55e-05	0.02 (0.01)	4.88639e-06	0.02 (0.01)	0.000213533	0.09 (0.1)	4.3e-05	0.03 (0.01)	3.7853e-06	0.04 (0.03)	1.60476e-06	0.04 (0.01)	0.000159933	0.04 (0.02)	7.21871e-06	0.04 (0.02)	-0.000105187	0.04 (0.01)	0.000120333	0.04 (0.01)	0.000502146
EGFR	P260	6.47602e-05	0.07 (0.02)	-4.05e-05	0.04 (0.02)	2.037e-05	0.03 (0.02)	0.000417807	0.05 (0.01)	0.00011	0.07 (0.02)	5.08894e-06	0.07 (0.05)	1.2881e-05	0.08 (0.01)	9.54667e-05	0.08 (0.04)	1.38483e-05	0.09 (0.02)	5.94311e-05	0.09 (0.03)	-2.3e-05	0.08 (0.02)	0.000109061
EGR4	E70	0.000715129	0.41 (0.07)	0.000140833	0.19 (0.04)	0.00149213	0.21 (0.08)	0.000856795	0.44 (0.15)	1.4e-05	0.36 (0.05)	0.000381858	0.19 (0.03)	0.00376389	0.4 (0.08)	0.000296367	0.6 (0.1)	0.000438664	0.43 (0.07)	0.000301742	0.43 (0.02)	0.000274333	0.42 (0.07)	0.000407797
EGR4	P479	0.000206573	0.11 (0.04)	5.51667e-05	0.03 (0.01)	0.000558032	0.06 (0.03)	4.74159e-05	0.21 (0.15)	-4.2e-05	0.07 (0.03)	2.9408e-05	0.08 (0.04)	-3.36e-05	0.12 (0.04)	0.000146367	0.34 (0.16)	0.000326269	0.12 (0.03)	0.000529833	0.07 (0.02)	-6.85e-05	0.09 (0.02)	0.000208329
EIF2AK2	E103	0.000338546	0.1 (0.03)	3.85e-05	0.03 (0.01)	0.0009172	0.04 (0.02)	0.000404395	0.09 (0.09)	-4.4e-05	0.1 (0.03)	0.000327355	0.05 (0.01)	0.000773357	0.09 (0.03)	-0.0001086	0.11 (0.05)	3.99663e-06	0.12 (0.03)	0.000165149	0.1 (0.03)	4.33333e-06	0.1 (0.03)	0.000210554
EIF2AK2	P313	3.13289e-05	0.07 (0.03)	3.48333e-05	0.06 (0.04)	4.65264e-06	0.07 (0.03)	3.02183e-05	0.04 (0)	0.000125	0.08 (0.05)	3.27081e-07	0.07 (0.02)	0.000114894	0.06 (0.02)	2.38667e-05	0.1 (0.1)	3.66654e-06	0.07 (0.03)	4.63391e-05	0.04 (0)	0.000626167	0.06 (0.03)	9.97872e-06
ELK3	P514	7.73098e-05	0.12 (0.05)	7.3e-05	0.15 (0.11)	-1.07418e-06	0.32 (0.09)	0.000600062	0.06 (0.01)	0.000219	0.11 (0.07)	4.61296e-06	0.14 (0.04)	0.000122495	0.2 (0.09)	-0.000168567	0.14 (0.1)	-3.42463e-06	0.26 (0.12)	0.000133043	0.18 (0.07)	-4.93333e-05	0.2 (0.05)	9.88506e-05
ELL	P693	0.000388919	0.41 (0.07)	8.66667e-05	0.46 (0.13)	-1.59626e-06	0.22 (0.06)	0.00324266	0.44 (0.11)	5.6e-05	0.53 (0.08)	4.22636e-05	0.42 (0.07)	0.000724506	0.39 (0.08)	9.03e-05	0.16 (0.09)	0.000653552	0.55 (0.08)	0.000977337	0.35 (0.13)	0.000197667	0.45 (0.1)	0.000101344
EMR3	E61	0.00227901	0.71 (0.13)	0.001768	0.2 (0.07)	0.000638847	0.8 (0.09)	0.0029724	0.8 (0.09)	0.001198	0.13 (0.04)	0.00258949	0.53 (0.18)	0.000586605	0.81 (0.05)	0.0044069	0.51 (0.17)	0.000488186	0.65 (0.18)	0.00169767	0.69 (0.15)	0.00120183	0.61 (0.11)	0.00401327
EMR3	P1297	0.000702361	0.88 (0.02)	0.000110167	0.88 (0.03)	4.39842e-05	0.92 (0.01)	0.000593808	0.91 (0.06)	-2.1e-05	0.85 (0.05)	2.18961e-05	0.92 (0.02)	0.000565611	0.88 (0.03)	0.000534333	0.61 (0.13)	0.00586824	0.91 (0.1)	0.000328508	0.91 (0.01)	0.000153167	0.91 (0.02)	0.000383475
EMR3	P39	0.00300935	0.85 (0.03)	0.000962667	0.19 (0.05)	0.00616615	0.88 (0.04)	0.00341198	0.74 (0.16)	0.000297	0.26 (0.1)	0.00253315	0.65 (0.13)	0.00258167	0.91 (0.02)	0.00412763	0.65 (0.13)	0.00253773	0.8 (0.14)	0.00155285	0.84 (0.04)	0.000577	0.8 (0.06)	0.00296157
ENC1	P484	0.00121102	0.08 (0.02)	0.000271833	0.03 (0)	0.00379684	0.03 (0.02)	0.0014585	0.09 (0.05)	0.000131	0.06 (0.01)	0.000953757	0.04 (0.01)	0.00301355	0.07 (0.01)	0.000558767	0.09 (0.02)	0.000160746	0.09 (0.02)	0.000601592	0.07 (0.01)	0.0001885	0.07 (0.01)	0.000565866
EPHA1	E46	6.725e-05	0.1 (0.04)	0.000121833	0.02 (0.01)	0.000156926	0.05 (0.04)	-1.06556e-05	0.08 (0.07)	-4.6e-05	0.04 (0.04)	2.84592e-06	0.06 (0.01)	6.23675e-05	0.07 (0.03)	-1.16e-05	0.07 (0.04)	3.2331e-06	0.07 (0.02)	-2.99298e-05	0.09 (0.03)	3.45e-05	0.07 (0.08)	0.000177135
EPHA1	P119	0.000785763	0.07 (0.04)	0.0001625	0.02 (0)	0.00312157	0.06 (0.02)	0.000684374	0.04 (0.01)	0.000137	0.03 (0.01)	4.75508e-05	0.05 (0.04)	-8.90778e-05	0.04 (0.01)	0.0003018	0.07 (0.03)	0.000669903	0.07 (0.03)	0.000701859	0.06 (0.03)	0.000165	0.04 (0.01)	0.000743604
EPHA2	P203	7.95951e-05	0.57 (0.11)	0.000148333	0.63 (0.08)	0.000143886	0.49 (0.15)	4.5219e-05	0.42 (0.07)	-1.3e-05	0.41 (0.08)	2.82902e-05	0.46 (0.13)	-8.52381e-06	0.27 (0.14)	0.000180533	0.17 (0.08)	0.000348313	0.43 (0.09)	7.59601e-06	0.49 (0.08)	-2.1e-05	0.45 (0.11)	3.95023e-05
EPHA2	P340	8.76296e-05	0.33 (0.05)	5.75e-05	0.41 (0.09)	4.26469e-05	0.26 (0.08)	9.86429e-06	0.14 (0.14)	6.4e-05	0.28 (0.06)	4.09785e-05	0.24 (0.09)	-6.38968e-06	0.15 (0.07)	0.000243267	0.07 (0.04)	0.000393449	0.3 (0.06)	1.82343e-05	0.3 (0.1)	-3.95e-05	0.28 (0.08)	9.21121e-05
EPHA3	E156	3.63175e-05	0.07 (0.05)	-1.68333e-05	0.06 (0.03)	5.79018e-06	0.04 (0.02)	0.000260193	0.13 (0.15)	2e-06	0.09 (0.03)	1.45057e-06	0.08 (0.03)	-1.07048e-05	0.09 (0.03)	3.02333e-05	0.12 (0.08)	-3.12436e-06	0.11 (0.03)	4.37315e-05	0.12 (0.08)	4e-05	0.11 (0.03)	6.77001e-05
EPHA3	P106	2.40667e-05	0.12 (0.04)	-1e-06	0.08 (0.06)	-4.70016e-07	0.17 (0.28)	-3.08254e-06	0.11 (0.12)	1.2e-05	0.06 (0.03)	9.08957e-06	0.09 (0.05)	-2.06905e-06	0.1 (0.03)	1.38667e-05	0.2 (0.19)	4.03651e-06	0.18 (0.13)	0.000125567	0.14 (0.12)	-6.3e-05	0.13 (0.05)	5.36514e-05
EPHA5	E158	0.000144268	0.06 (0.01)	4.5e-05	0.02 (0.01)	0.000160458	0.02 (0.02)	0.000206469	0.03 (0)	0.00012	0.04 (0.01)	0.000135116	0.04 (0.03)	-5.73413e-06	0.07 (0.03)	5.86667e-06	0.21 (0.11)	0.000401772	0.07 (0.02)	0.000234994	0.12 (0.14)	1e-06	0.06 (0.01)	7.09868e-05
EPHA5	P66	0.000745791	0.44 (0.05)	8.93333e-05	0.5 (0.07)	6.80485e-05	0.28 (0.11)	0.000920918	0.42 (0.31)	1.7e-05	0.38 (0.07)	9.76663e-05	0.43 (0.12)	0.00029805	0.49 (0.12)	0.000194967	0.88 (0.05)	0.00640404	0.49 (0.08)	0.000198551	0.56 (0.19)	-0.000325167	0.52 (0.08)	0.000413279
EPHA7	E6	0.000126126	0.07 (0.05)	-8.63333e-05	0.03 (0.01)	8.37497e-05	0.03 (0.01)	0.000547174	0.05 (0)	7.2e-05	0.05 (0.01)	5.7404e-05	0.09 (0.06)	-8.2754e-06	0.08 (0.02)	7.98667e-05	0.2 (0.11)	0.000266961	0.08 (0.02)	3.53356e-05	0.08 (0.05)	-2.1e-05	0.08 (0.02)	0.00015987
EPHA7	P205	0.000594744	0.07 (0.01)	-2.53333e-05	0.04 (0.01)	5.42324e-05	0.04 (0.02)	0.000619467	0.06 (0)	0.000108	0.05 (0.02)	9.39848e-05	0.06 (0.03)	7.27778e-06	0.08 (0.01)	0.0001484	0.22 (0.09)	0.000689194	0.1 (0.03)	-0.000539362	0.09 (0.04)	-0.000121	0.09 (0.02)	0.00211205
EPHA8	P256	5.3051e-05	0.15 (0.07)	-3.65e-05	0.1 (0.03)	2.68712e-05	0.1 (0.07)	3.66325e-05	0.11 (0.11)	-2.4e-05	0.13 (0.04)	1.53834e-05	0.11 (0.03)	9.10984e-05	0.23 (0.09)	3.53333e-05	0.26 (0.09)	2.21016e-05	0.22 (0.05)	5.28965e-05	0.22 (0.05)	5.43333e-05	0.2 (0.04)	0.00012169
EPHA8	P456	7.52514e-06	0.8 (0.04)	5.83333e-06	0.83 (0.08)	-2.02024e-06	0.85 (0.04)	4.84635e-05	0.5 (0.34)	5e-05	0.82 (0.04)	4.80734e-06	0.81 (0.04)	2.9627e-05	0.81 (0.05)	-1.43333e-05	0.75 (0.07)	9.94209e-06	0.83 (0.04)	-2.64007e-05	0.81 (0.05)	1.33333e-05	0.82 (0.05)	8.88781e-06
EPHB1	E202	0.000707566	0.81 (0.05)	5.65e-05	0.66 (0.07)	0.00163874	0.62 (0.1)	0.000701932	0.88 (0.01)	0.000142	0.83 (0.03)	0.000708904	0.64 (0.04)	0.00235771	0.81 (0.08)	-0.000148533	0.83 (0.08)	2.45142e-05	0.85 (0.07)	8.89038e-05	0.83 (0.03)	0.000150667	0.84 (0.05)	0.000562067
EPHB1	P503	2.66075e-05	0.12 (0.04)	-9.9e-05	0.08 (0.04)	3.30708e-07	0.15 (0.17)	8.49286e-06	0.08 (0.01)	4.5e-05	0.12 (0.04)	8.19765e-07	0.09 (0.03)	2.32548e-05	0.12 (0.02)	-3.85667e-05	0.12 (0.05)	4.1963e-06	0.16 (0.06)	0.000206804	0.11 (0.03)	-2.2e-05	0.12 (0.02)	4.33633e-05
EPHB2	E297	0.000208985	0.04 (0.01)	4.03333e-05	0.01 (0)	0.000362078	0.02 (0.02)	0.00126725	0.03 (0)	9e-05	0.03 (0.01)	2.47748e-05	0.04 (0.01)	0.00065713	0.04 (0.01)	0.0001124	0.07 (0.03)	7.41866e-05	0.05 (0.02)	0.000149081	0.04 (0.01)	-8.5e-06	0.04 (0.01)	0.000117242
EPHB2	P165	0.000159526	0.1 (0.05)	-4.55e-05	0.03 (0.01)	0.000318458	0.04 (0.05)	0.00048147	0.1 (0.04)	-2e-06	0.1 (0.06)	4.61062e-05	0.05 (0.02)	0.000240063	0.12 (0.04)	9.33333e-05	0.14 (0.11)	3.25773e-05	0.17 (0.07)	0.000379632	0.12 (0.08)	-8.8e-05	0.12 (0.05)	0.00013441
EPHB3	E0	0.000430917	0.2 (0.06)	0.000321333	0.02 (0.01)	0.000868523	0.03 (0.03)	0.000677021	0.03 (0)	0.000284	0.12 (0.05)	0.000191332	0.04 (0.02)	0.00105991	0.12 (0.05)	-6.2e-05	0.11 (0.06)	-2.00508e-06	0.12 (0.05)	-5.88943e-05	0.15 (0.06)	5.8e-05	0.14 (0.04)	0.000681464
EPHB3	P569	8.26134e-05	0.11 (0.02)	-9e-06	0.06 (0.02)	3.72034e-05	0.05 (0.02)	0.000649477	0.13 (0.09)	-6.9e-05	0.11 (0.04)	6.98196e-06	0.07 (0.02)	0.000101325	0.09 (0.03)	-6.96e-05	0.19 (0.06)	9.72757e-05	0.14 (0.05)	0.000162051	0.11 (0.01)	0.000127667	0.11 (0.03)	5.614e-05
EPHB4	E476	0.000249165	0.59 (0.1)	0.000513167	0.19 (0.08)	0.000335064	0.12 (0.14)	0.000609885	0.25 (0.27)	3.7e-05	0.45 (0.08)	0.000102379	0.18 (0.07)	0.00101733	0.51 (0.09)	0.000141833	0.56 (0.15)	4.84366e-05	0.51 (0.08)	9.1183e-05	0.54 (0.05)	0.000164833	0.47 (0.07)	0.000235564
EPHB4	P313	2.83858e-05	0.09 (0.05)	-4.91667e-05	0.05 (0.02)	4.21484e-05	0.07 (0.05)	5.57937e-07	0.05 (0.01)	7.9e-05	0.15 (0.06)	7.72446e-06	0.09 (0.05)	-6.55952e-06	0.08 (0.04)	-1.59333e-05	0.17 (0.22)	2.78141e-06	0.11 (0.03)	2.87612e-05	0.1 (0.04)	-2.1e-05	0.09 (0.02)	8.02404e-05
EPHB6	E342	0.00022124	0.11 (0.04)	5.26667e-05	0.03 (0.01)	0.000478056	0.04 (0.02)	0.000308388	0.09 (0.1)	-6.1e-05	0.11 (0.04)	0.000143338	0.04 (0.01)	0.000740679	0.1 (0.03)	-1.30667e-05	0.19 (0.09)	2.73805e-05	0.14 (0.05)	0.000148874	0.11 (0.06)	-5.1e-05	0.12 (0.04)	0.000202788
EPHB6	P827	9.44038e-05	0.03 (0)	-1.26667e-05	0.03 (0)	1.06102e-05	0.05 (0.02)	0.000531021	0.02 (0.01)	-4e-05	0.02 (0)	0.000191253	0.03 (0)	4.23976e-05	0.03 (0.01)	1.39667e-05	0.03 (0.01)	2.2209e-05	0.03 (0.01)	8.54541e-05	0.03 (0)	1.48333e-05	0.03 (0)	1.97979e-05
EPHX1	E152	0.000696735	0.72 (0.03)	0.000286333	0.84 (0.03)	0.000202992	0.7 (0.06)	0.000849863	0.51 (0.21)	0.000186	0.88 (0.03)	0.000800651	0.58 (0.13)	0.000958315	0.63 (0.06)	0.0009287	0.85 (0.03)	0.00112195	0.71 (0.06)	0.000278835	0.59 (0.24)	-6.43333e-05	0.65 (0.09)	0.000892466
EPHX1	P1358	0.00033271	0.83 (0.03)	0.000541167	0.81 (0.05)	2.43336e-06	0.77 (0.1)	0.000129284	0.82 (0.04)	5.6e-05	0.84 (0.02)	7.91033e-05	0.78 (0.03)	0.000116902	0.81 (0.07)	0.000348967	0.82 (0.06)	4.46722e-05	0.66 (0.08)	0.00324309	0.84 (0.03)	0.000628	0.72 (0.08)	6.70159e-05
EPHX1	P22	0.000208721	0.88 (0.02)	4.88333e-05	0.95 (0.01)	0.000765598	0.89 (0.02)	0.000160022	0.86 (0.06)	-2.6e-05	0.91 (0.03)	2.26008e-05	0.89 (0.03)	0.000108753	0.82 (0.04)	0.000363133	0.94 (0.02)	0.000284571	0.87 (0.03)	0.000141306	0.84 (0.12)	1.01667e-05	0.87 (0.04)	0.00011148
EPM2A	P113	0.000139021	0.12 (0.06)	-1.3e-05	0.07 (0.02)	7.71372e-05	0.26 (0.08)	0.000557825	0.12 (0.12)	-5e-06	0.1 (0.04)	4.26417e-05	0.23 (0.1)	0.000224245	0.14 (0.04)	3.96667e-05	0.41 (0.14)	0.000446527	0.17 (0.08)	3.40224e-05	0.12 (0.02)	9.26667e-05	0.13 (0.04)	0.000102893
EPM2A	P64	2.54391e-05	0.05 (0.02)	-2.88333e-05	0.03 (0)	0.00011425	0.03 (0.01)	1.99065e-05	0.09 (0.09)	2e-06	0.03 (0.01)	1.86963e-06	0.04 (0.01)	0.000100393	0.04 (0.01)	2.97333e-05	0.05 (0.01)	1.89358e-06	0.04 (0.01)	-2.05472e-05	0.03 (0.01)	6.33333e-06	0.04 (0.01)	1.41054e-05
EPO	E244	2.52034e-05	0.06 (0.04)	-2.26667e-05	0.04 (0.02)	4.20997e-05	0.07 (0.02)	3.76389e-05	0.11 (0.12)	2e-05	0.09 (0.07)	3.46782e-07	0.11 (0.04)	4.12286e-05	0.07 (0.04)	-3.37333e-05	0.09 (0.09)	-1.23737e-06	0.13 (0.12)	2.45478e-05	0.1 (0.03)	-6.16667e-06	0.08 (0.03)	6.26964e-05
EPO	P162	0.000918678	0.43 (0.12)	-2.25e-05	0.13 (0.04)	0.00133136	0.1 (0.12)	0.00180493	0.72 (0.08)	0.000445	0.3 (0.07)	0.000442975	0.18 (0.06)	0.00145883	0.37 (0.1)	-5.13333e-06	0.43 (0.11)	5.55086e-05	0.44 (0.07)	-0.000254969	0.48 (0.02)	0.000417167	0.44 (0.05)	0.00182349
EPS8	E231	0.000325388	0.26 (0.06)	-5.6e-05	0.12 (0.03)	0.000278007	0.12 (0.07)	0.000449375	0.16 (0.14)	-3.5e-05	0.24 (0.06)	2.37443e-05	0.14 (0.04)	0.000627913	0.26 (0.08)	-3.47333e-05	0.33 (0.07)	5.98633e-05	0.33 (0.06)	3.97956e-05	0.31 (0.03)	0.000155	0.3 (0.04)	0.000865379
EPS8	P437	0.00033161	0.13 (0.04)	0.000324333	0.11 (0.04)	5.5336e-05	0.1 (0.05)	0.000277113	0.08 (0.08)	9.9e-05	0.12 (0.06)	2.55425e-05	0.1 (0.04)	0.000363154	0.15 (0.05)	5.98333e-05	0.15 (0.06)	-8.53619e-06	0.23 (0.06)	0.000454003	0.16 (0.04)	-7.85e-05	0.22 (0.05)	0.00095542
ER	S60	6.06683e-05	0.2 (0.05)	0.000290667	0.06 (0.03)	4.20362e-05	0.07 (0.04)	5.44429e-05	0.11 (0.08)	-6.2e-05	0.13 (0.07)	2.56487e-06	0.09 (0.05)	3.04881e-05	0.17 (0.05)	1.31667e-05	0.22 (0.07)	5.4514e-05	0.16 (0.04)	1.89333e-05	0.28 (0.17)	0.000102833	0.13 (0.03)	0.000136795
ERBB2	P59	0.000268632	0.03 (0.01)	-4.25e-05	0.04 (0.02)	2.37774e-05	0.02 (0)	0.000229929	0.02 (0)	4.6e-05	0.02 (0)	5.03779e-05	0.07 (0.03)	0.00153678	0.03 (0.01)	1.19333e-05	0.03 (0.02)	1.96601e-05	0.03 (0.02)	-1.64448e-05	0.02 (0)	1.95e-05	0.02 (0)	0.000654178
ERBB3	E331	0.000103294	0.11 (0.07)	-5.23333e-05	0.03 (0.01)	0.000117584	0.07 (0.04)	-7.15476e-06	0.06 (0.01)	7.2e-05	0.08 (0.03)	4.11722e-06	0.06 (0.03)	0.000102098	0.1 (0.02)	-4.7e-06	0.13 (0.06)	9.92193e-06	0.14 (0.04)	0.000585019	0.1 (0.04)	-4.26667e-05	0.1 (0.02)	0.000141995
ERBB3	P870	3.26803e-05	0.09 (0.02)	5.33333e-05	0.08 (0.03)	5.59151e-06	0.05 (0.03)	3.4173e-05	0.09 (0.11)	8e-06	0.05 (0.02)	1.46438e-05	0.07 (0.03)	2.00167e-05	0.05 (0.02)	1.68333e-05	0.05 (0.04)	7.68939e-06	0.08 (0.03)	1.61021e-05	0.05 (0.02)	0.000166333	0.08 (0.03)	6.55793e-05
ERBB4	P255	2.56951e-05	0.03 (0.01)	-4.21667e-05	0.02 (0.01)	1.45192e-05	0.02 (0.01)	0.000228384	0.03 (0)	-9e-06	0.03 (0.02)	4.36395e-07	0.04 (0.02)	7.93119e-05	0.03 (0.01)	1.53667e-05	0.03 (0.02)	-3.61183e-07	0.04 (0.03)	5.74639e-06	0.03 (0.01)	6.65e-05	0.03 (0.01)	1.79108e-05
ERBB4	P541	0.000182718	0.04 (0.01)	3.03333e-05	0.03 (0.01)	1.70393e-06	0.02 (0.01)	0.000794465	0.03 (0)	4.4e-05	0.02 (0.01)	2.25133e-05	0.05 (0.04)	4.34413e-05	0.03 (0.01)	0.0001563	0.03 (0.01)	2.56914e-05	0.04 (0.02)	-2.9655e-05	0.04 (0.02)	-7.5e-06	0.05 (0.02)	0.000510943
ERCC1	P354	6.6072e-05	0.04 (0.01)	4.93333e-05	0.02 (0.01)	4.1211e-05	0.02 (0.01)	0.000232806	0.03 (0.01)	1e-05	0.04 (0.02)	1.60816e-06	0.03 (0.01)	-2.63032e-05	0.04 (0.01)	7.76667e-05	0.08 (0.05)	2.45473e-05	0.04 (0.01)	-5.8777e-05	0.04 (0.02)	-7.55e-05	0.03 (0.01)	0.000202014
ERCC1	P440	0.00021891	0.09 (0.04)	-0.000107	0.18 (0.09)	3.34117e-05	0.06 (0.03)	0.000147793	0.09 (0.1)	5.1e-05	0.25 (0.09)	0.000566185	0.07 (0.02)	0.00019431	0.05 (0.02)	0.000123833	0.1 (0.06)	-6.08341e-06	0.08 (0.03)	6.67347e-05	0.09 (0.05)	-3.15e-05	0.07 (0.03)	0.000206909
ERCC3	P1210	0.00185261	0.91 (0.01)	0.000542833	0.72 (0.08)	0.00386333	0.89 (0.02)	0.001385	0.92 (0.03)	0.000229	0.76 (0.06)	0.00170591	0.9 (0.05)	0.000737555	0.92 (0.03)	0.0010091	0.93 (0.02)	0.00209454	0.93 (0.02)	0.00123473	0.92 (0.03)	0.0004355	0.92 (0.02)	0.00180066
ERCC6	P698	0.00115639	0.61 (0.05)	0.0002435	0.16 (0.05)	0.00333231	0.24 (0.19)	0.000679502	0.71 (0.07)	0.000213	0.56 (0.07)	0.00116705	0.17 (0.03)	0.00392242	0.61 (0.05)	0.000450633	0.68 (0.15)	8.17539e-05	0.68 (0.06)	0.000394264	0.61 (0.06)	0.000129667	0.64 (0.05)	0.000479743
ERG	E28	0.00279447	0.22 (0.07)	-0.000502	0.11 (0.08)	0.000573029	0.12 (0.07)	0.00329734	0.18 (0.16)	-0.000162	0.29 (0.07)	0.000450523	0.14 (0.07)	0.0021442	0.18 (0.06)	0.00146553	0.07 (0.05)	0.00654519	0.36 (0.15)	0.000243356	0.19 (0.13)	0.000896667	0.38 (0.11)	0.0068404
ERN1	P809	0.00512657	0.49 (0.17)	-0.000546667	0.32 (0.08)	0.000861141	0.66 (0.09)	0.00491399	0.09 (0.03)	0.001476	0.59 (0.05)	0.00227626	0.46 (0.17)	-0.000353519	0.61 (0.12)	0.00462993	0.26 (0.09)	0.00160809	0.43 (0.09)	0.00362161	0.59 (0.17)	0.00369733	0.33 (0.07)	0.0144934
ESR1	E298	0.000489359	0.15 (0.02)	0.00175383	0.05 (0.02)	2.15717e-05	0.08 (0.06)	3.50349e-05	0.08 (0.08)	-3.4e-05	0.08 (0.04)	4.94216e-07	0.1 (0.06)	5.77889e-05	0.15 (0.04)	0.000809467	0.08 (0.04)	-1.18297e-06	0.13 (0.1)	-0.000161968	0.24 (0.22)	0.000171	0.08 (0.02)	0.00179215
ESR1	P151	0.00524121	0.21 (0.08)	0.000916833	0.15 (0.08)	0.00199063	0.14 (0.05)	0.0019885	0.06 (0.06)	0.000248	0.03 (0.02)	0.0121659	0.19 (0.1)	0.00286685	0.32 (0.18)	0.0019456	0.28 (0.15)	0.00463316	0.29 (0.2)	0.00235371	0.36 (0.31)	0.000964667	0.21 (0.07)	0.00407983
ESR2	E66	0.000121554	0.07 (0.03)	-0.000122333	0.03 (0.01)	4.4606e-05	0.03 (0.02)	0.000266875	0.02 (0.01)	0.000228	0.06 (0.03)	-6.27563e-07	0.06 (0.03)	5.30952e-05	0.06 (0.01)	0.000339167	0.08 (0.09)	-1.73346e-06	0.12 (0.08)	0.0010419	0.08 (0.02)	-9.8e-05	0.07 (0.02)	4.1772e-05
ESR2	P162	0.000161677	0.18 (0.04)	4.35e-05	0.05 (0.02)	0.000180761	0.09 (0.04)	0.000140687	0.17 (0.12)	-0.000111	0.14 (0.05)	4.91137e-05	0.07 (0.02)	0.000881794	0.14 (0.03)	0.0001272	0.29 (0.12)	6.29333e-05	0.26 (0.08)	0.000471625	0.18 (0.05)	-5.06667e-05	0.2 (0.05)	9.18414e-05
ETS1	E253	0.000307005	0.23 (0.05)	-2.51667e-05	0.2 (0.04)	1.25966e-05	0.17 (0.07)	6.67302e-05	0.17 (0.04)	8.7e-05	0.24 (0.06)	2.61844e-07	0.18 (0.04)	0.000226088	0.26 (0.07)	3.96667e-06	0.35 (0.1)	4.3781e-05	0.29 (0.07)	-0.000183935	0.26 (0.03)	5.23333e-05	0.28 (0.05)	0.00125239
ETS1	P559	2.29975e-05	0.03 (0.01)	-2e-05	0.02 (0.01)	1.07652e-05	0.03 (0.01)	-6.94048e-06	0.03 (0.01)	1e-05	0.02 (0.01)	1.92155e-05	0.03 (0.01)	1.98333e-06	0.03 (0.01)	-1.96667e-06	0.04 (0.02)	5.16113e-06	0.03 (0.01)	2.07305e-06	0.03 (0)	-3.51667e-05	0.03 (0)	7.34573e-05
ETS2	P684	0.000239315	0.06 (0.01)	0.000376667	0.02 (0)	0.000206718	0.07 (0.13)	0.000102084	0.05 (0.05)	-0.000121	0.04 (0.01)	3.67238e-05	0.04 (0.02)	0.000199801	0.06 (0.02)	0.000112433	0.07 (0.03)	-1.20406e-05	0.15 (0.17)	0.00165387	0.04 (0.01)	0.000547333	0.07 (0.02)	0.000125987
ETS2	P835	0.000186995	0.14 (0.03)	9.51667e-05	0.04 (0.01)	0.00019967	0.11 (0.09)	6.07714e-05	0.05 (0.04)	3.5e-05	0.05 (0.02)	0.000121642	0.11 (0.03)	6.95611e-05	0.11 (0.06)	-5.83e-05	0.07 (0.03)	1.93459e-05	0.2 (0.16)	0.000370132	0.08 (0.03)	-9.78333e-05	0.13 (0.04)	0.000381722
ETV1	P235	0.000313884	0.06 (0.05)	1.41667e-05	0.1 (0.05)	6.6001e-05	0.08 (0.02)	0.000370365	0.12 (0.13)	-5.2e-05	0.05 (0.03)	1.53383e-05	0.2 (0.1)	0.00281401	0.08 (0.03)	-9.6e-06	0.05 (0.02)	5.2546e-05	0.09 (0.07)	-7.59136e-05	0.11 (0.06)	-4.9e-05	0.1 (0.05)	0.000679746
ETV1	P515	4.0581e-05	0.09 (0.03)	-2.28333e-05	0.06 (0.01)	4.2431e-05	0.05 (0.02)	0.000235638	0.06 (0)	0.000126	0.09 (0.03)	5.43012e-06	0.09 (0.04)	1.16262e-05	0.1 (0.02)	-2.78e-05	0.16 (0.1)	9.36743e-06	0.13 (0.04)	0.000186489	0.11 (0.02)	-1.5e-06	0.11 (0.03)	1.0829e-05
ETV6	E430	4.02621e-05	0.08 (0.04)	0.000115833	0.18 (0.05)	3.67163e-05	0.18 (0.05)	3.6396e-05	0.21 (0.01)	0.000139	0.1 (0.07)	1.01486e-06	0.22 (0.04)	0.000267935	0.08 (0.02)	0.0001641	0.1 (0.08)	6.17561e-06	0.14 (0.05)	3.43047e-05	0.12 (0.05)	-1.51667e-05	0.12 (0.05)	2.10099e-05
EVI1	E47	0.000101488	0.11 (0.06)	-9.53333e-05	0.07 (0.02)	4.34055e-05	0.1 (0.04)	-1.79841e-06	0.09 (0.11)	3.9e-05	0.14 (0.07)	4.16874e-06	0.13 (0.07)	3.16706e-05	0.12 (0.06)	-5.93667e-05	0.15 (0.2)	-5.07146e-06	0.16 (0.06)	0.000537577	0.21 (0.19)	-3.73333e-05	0.1 (0.06)	0.000227767
EVI1	P30	7.27497e-05	0.05 (0.02)	0.000176167	0.03 (0.02)	5.92637e-05	0.1 (0.05)	7.14071e-05	0.05 (0.02)	1.6e-05	0.05 (0.02)	2.37167e-05	0.05 (0.03)	3.18929e-05	0.11 (0.03)	0.000236267	0.1 (0.17)	3.76522e-06	0.1 (0.04)	6.23063e-05	0.15 (0.12)	0.000380667	0.08 (0.02)	0.000120744
EVI2A	E420	0.000213965	0.89 (0.03)	-3.18333e-05	0.66 (0.08)	0.000627082	0.88 (0.07)	7.22214e-05	0.91 (0.08)	2.2e-05	0.81 (0.05)	0.000226777	0.92 (0.04)	0.000168025	0.93 (0.02)	0.0001627	0.95 (0.03)	0.000255744	0.9 (0.06)	7.10917e-05	0.91 (0.02)	5.23333e-05	0.9 (0.04)	8.35556e-05
EVI2A	P94	0.00687715	0.86 (0.03)	0.00139683	0.02 (0.01)	0.0123276	0.72 (0.18)	0.00524518	0.88 (0.08)	0.000697	0.1 (0.05)	0.00879212	0.88 (0.1)	0.00507893	0.92 (0.01)	0.00323647	0.94 (0.03)	0.00684535	0.8 (0.21)	0.00300254	0.88 (0.04)	0.001308	0.86 (0.06)	0.00588725
EXT1	E197	0.000124624	0.16 (0.07)	-0.0001285	0.09 (0.02)	5.86917e-05	0.08 (0.03)	0.000245307	0.1 (0.08)	-5.6e-05	0.16 (0.06)	1.37171e-06	0.08 (0.03)	0.000360099	0.1 (0.03)	0.000155033	0.21 (0.11)	1.40866e-05	0.2 (0.08)	0.000448701	0.12 (0.02)	2.08333e-05	0.15 (0.03)	0.000187732
EYA4	E277	3.22341e-05	0.21 (0.06)	0.000197	0.1 (0.03)	2.60568e-06	0.09 (0.07)	5.29048e-05	0.07 (0.01)	8.4e-05	0.11 (0.06)	2.023e-06	0.18 (0.1)	1.34127e-07	0.13 (0.06)	-3.16e-05	0.17 (0.14)	-1.09156e-06	0.15 (0.05)	-3.62181e-05	0.25 (0.29)	1.11667e-05	0.16 (0.06)	0.000109744
EYA4	P508	3.35324e-05	0.14 (0.05)	-6.05e-05	0.06 (0.03)	2.85205e-05	0.11 (0.08)	4.0873e-06	0.03 (0)	0.000172	0.1 (0.05)	7.42435e-07	0.08 (0.03)	6.58095e-05	0.13 (0.03)	-3.04667e-05	0.15 (0.08)	-2.41416e-06	0.19 (0.1)	0.000132384	0.13 (0.03)	4.36667e-05	0.13 (0.03)	5.56243e-05
EYA4	P794	0.00170464	0.4 (0.05)	0.000854167	0.08 (0.03)	0.00109576	0.6 (0.1)	0.00365842	0.2 (0.22)	-0.000209	0.06 (0.02)	0.00217825	0.49 (0.2)	0.00154527	0.22 (0.07)	0.000981733	0.14 (0.05)	0.000561693	0.45 (0.17)	0.0017502	0.46 (0.03)	0.002487	0.3 (0.07)	0.00177295
F2R	P839	0.00210421	0.64 (0.05)	0.000547	0.16 (0.04)	0.00956849	0.45 (0.08)	0.00162076	0.65 (0.17)	2.9e-05	0.43 (0.07)	0.00046443	0.63 (0.11)	0.0015735	0.71 (0.04)	0.00136713	0.75 (0.07)	0.001356	0.66 (0.07)	0.000878032	0.71 (0.1)	0.000620833	0.59 (0.08)	0.00114382
			Bladder (n=5)		Blood (n=30)		Brain (n=12)		Cervix (n=3)		Infant blood (n=55)		Head and neck (n=11)		Kidney (n=6)		Placenta (n=19)		Pleura (n=18)		Small intestine (n=5)		Lung (n=53)
GENE	CpG	Mean decrease in accuracy	Mean (sd)	Decrease in accuracy	Mean (sd)	Decrease in accuracy	Mean (sd)	Decrease in accuracy	Mean (sd)	Decrease in accuracy	Mean (sd)	Decrease in accuracy	Mean (sd)	Decrease in accuracy	Mean (sd)	Decrease in accuracy	Mean (sd)	Decrease in accuracy	Mean (sd)	Decrease in accuracy	Mean (sd)	Decrease in accuracy	Mean (sd)	Decrease in accuracy
F2R	P88	1.09746e-05	0.11 (0.03)	-4.03333e-05	0.06 (0.03)	2.63745e-05	0.11 (0.07)	-6.27857e-06	0.23 (0.17)	-3e-05	0.14 (0.08)	-1.60532e-06	0.11 (0.05)	5.04683e-06	0.1 (0.06)	-3.64667e-05	0.18 (0.11)	2.37299e-06	0.16 (0.05)	5.28865e-05	0.13 (0.03)	1.86667e-05	0.13 (0.04)	2.47356e-05
FABP3	E113	0.00042787	0.13 (0.04)	-1.15e-05	0.14 (0.08)	4.4552e-06	0.09 (0.03)	0.000750611	0.16 (0.15)	-5.8e-05	0.12 (0.03)	3.83691e-05	0.16 (0.06)	-0.000116365	0.12 (0.03)	0.000333633	0.09 (0.05)	0.000337096	0.24 (0.12)	0.000516181	0.41 (0.32)	0.000294167	0.22 (0.05)	0.00124068
FABP3	P598	9.16375e-05	0.13 (0.01)	0.000107333	0.08 (0.02)	2.8507e-05	0.06 (0.03)	0.000348064	0.12 (0.06)	-5.2e-05	0.1 (0.02)	9.24781e-06	0.1 (0.02)	5.68373e-05	0.11 (0.03)	-5.16e-05	0.14 (0.04)	7.81664e-06	0.15 (0.04)	5.73909e-05	0.13 (0.03)	8.33333e-06	0.14 (0.03)	0.000233239
FANCA	P1006	0.00231416	0.84 (0.07)	-5.55e-05	0.88 (0.02)	6.62565e-05	0.84 (0.03)	0.00206039	0.8 (0.12)	-0.000559	0.82 (0.04)	8.56337e-05	0.86 (0.02)	0.00163657	0.86 (0.03)	0.0007843	0.41 (0.15)	0.00891281	0.87 (0.04)	-0.000477954	0.86 (0.03)	-0.000624667	0.9 (0.03)	0.00559367
FANCE	P356	0.000417047	0.11 (0.02)	0.000139667	0.06 (0.03)	4.1157e-05	0.18 (0.1)	0.000500294	0.19 (0.12)	5e-06	0.07 (0.02)	0.000113396	0.3 (0.2)	0.00112296	0.15 (0.04)	0.00102853	0.17 (0.05)	0.00136998	0.13 (0.07)	-9.53166e-05	0.13 (0.05)	0.000150667	0.1 (0.02)	0.000560117
FANCF	P13	2.48478e-05	0.05 (0.02)	-2.5e-05	0.03 (0)	6.1787e-05	0.03 (0.01)	3.38238e-05	0.02 (0)	0.0001	0.04 (0.03)	1.56714e-06	0.03 (0.01)	2.57952e-05	0.04 (0.01)	-7.93333e-06	0.06 (0.05)	3.09524e-08	0.05 (0.02)	0.000103189	0.05 (0.02)	-6.75e-05	0.04 (0.01)	2.52599e-05
FANCG	E207	0.000153649	0.06 (0.03)	-6.2e-05	0.02 (0.01)	0.000190691	0.03 (0.01)	0.00033852	0.13 (0.15)	-5.9e-05	0.07 (0.03)	2.26831e-06	0.04 (0.01)	0.000291031	0.08 (0.04)	-4.91e-05	0.1 (0.06)	3.94805e-07	0.11 (0.04)	0.000808857	0.1 (0.03)	0.000142167	0.07 (0.03)	0.000107131
FAS	P322	0.000513641	0.06 (0.03)	0.000265	0.12 (0.06)	7.0613e-05	0.33 (0.13)	0.00267406	0.04 (0.01)	0.000292	0.26 (0.08)	0.000986625	0.06 (0.02)	0.000932629	0.09 (0.03)	0.0005102	0.14 (0.09)	-3.96398e-07	0.1 (0.03)	0.000217219	0.07 (0.03)	0.000258167	0.11 (0.1)	9.87893e-05
FAS	P65	0.000158574	0.06 (0.02)	3.1e-05	0.05 (0.02)	2.60016e-05	0.24 (0.1)	0.00143801	0.21 (0.16)	0.000112	0.1 (0.03)	6.41445e-06	0.05 (0.02)	0.000444148	0.07 (0.02)	-7.63333e-06	0.09 (0.04)	-5.14848e-06	0.08 (0.02)	-5.77936e-05	0.06 (0.01)	3.71667e-05	0.07 (0.02)	0.000216757
FASTK	P257	0.000430491	0.1 (0.03)	0.000320167	0.09 (0.04)	0.000580181	0.06 (0.04)	0.000470838	0.15 (0.21)	7e-06	0.26 (0.06)	0.00069139	0.07 (0.02)	0.000606434	0.11 (0.04)	0.000414233	0.14 (0.09)	4.83072e-06	0.21 (0.06)	0.000516467	0.13 (0.03)	5.18333e-05	0.15 (0.05)	0.000206083
FASTK	P598	0.00169777	0.62 (0.1)	0.000315	0.89 (0.02)	0.00724392	0.61 (0.08)	0.00117773	0.41 (0.28)	0.000185	0.81 (0.04)	0.000394746	0.56 (0.16)	0.000932141	0.55 (0.09)	0.000733667	0.6 (0.1)	0.00126149	0.65 (0.07)	0.000706914	0.68 (0.07)	0.0003385	0.7 (0.06)	0.00119017
FAT	P279	7.63869e-05	0.15 (0.05)	-3.4e-05	0.1 (0.04)	8.88151e-06	0.06 (0.03)	0.000610363	0.13 (0.09)	-4e-05	0.15 (0.04)	3.34081e-06	0.15 (0.08)	2.5096e-05	0.16 (0.05)	1.71667e-05	0.17 (0.08)	2.69502e-06	0.21 (0.05)	4.49109e-05	0.2 (0.04)	1.15e-05	0.2 (0.06)	0.000148968
FAT	P973	0.000195109	0.06 (0.03)	-6.03333e-05	0.12 (0.05)	6.50038e-05	0.05 (0.02)	0.000143041	0.03 (0.01)	0.000236	0.06 (0.03)	2.91256e-06	0.13 (0.09)	7.90603e-05	0.05 (0.02)	0.000110133	0.04 (0.02)	4.66921e-05	0.08 (0.03)	-0.000136802	0.09 (0.04)	5.33333e-05	0.1 (0.05)	0.000716151
FER	E119	0.000678243	0.33 (0.09)	1.01667e-05	0.1 (0.03)	0.000531821	0.07 (0.06)	0.00287496	0.19 (0.14)	-0.000166	0.26 (0.07)	5.92488e-05	0.09 (0.02)	0.00264967	0.3 (0.06)	0.0002009	0.3 (0.12)	-1.10912e-05	0.42 (0.11)	0.000881412	0.39 (0.08)	0.000425333	0.36 (0.08)	0.000895244
FER	P581	0.00046449	0.72 (0.07)	0.000208167	0.93 (0.02)	0.000934111	0.94 (0.05)	0.00174106	0.85 (0.06)	-4.1e-05	0.82 (0.05)	0.000263747	0.85 (0.09)	0.000199722	0.69 (0.13)	0.0002247	0.68 (0.08)	0.000149864	0.7 (0.07)	0.000493733	0.83 (0.04)	0.000131333	0.75 (0.07)	0.000382128
FES	E34	0.000283733	0.13 (0.02)	0.000269	0.05 (0.02)	0.000150865	0.09 (0.06)	2.72159e-05	0.11 (0.07)	-6.5e-05	0.06 (0.02)	0.000255872	0.04 (0.01)	0.00123769	0.17 (0.07)	0.0003295	0.16 (0.06)	0.000132011	0.17 (0.04)	0.000277572	0.13 (0.02)	0.000198	0.15 (0.03)	0.000351939
FES	P223	0.000103147	0.08 (0.04)	-8.85e-05	0.07 (0.03)	-1.76596e-06	0.16 (0.07)	5.3969e-05	0.05 (0)	0.000181	0.06 (0.02)	4.3463e-05	0.09 (0.04)	-1.73254e-05	0.17 (0.11)	4.3e-06	0.09 (0.05)	-3.86111e-06	0.11 (0.04)	8.33977e-05	0.06 (0.03)	-2e-06	0.12 (0.05)	0.000341835
FGF1	E5	0.00131783	0.79 (0.08)	0.000198833	0.91 (0.01)	0.00527043	0.75 (0.09)	0.000787787	0.52 (0.25)	0.00026	0.86 (0.03)	0.000166356	0.71 (0.11)	0.00087029	0.81 (0.07)	0.000229133	0.6 (0.09)	0.00112261	0.76 (0.04)	0.001031	0.88 (0.01)	0.000543833	0.81 (0.05)	0.00106677
FGF1	P357	0.000661337	0.69 (0.13)	0.000512167	0.92 (0.01)	0.000329857	0.47 (0.1)	0.00370372	0.46 (0.33)	0.000204	0.9 (0.02)	0.000230755	0.51 (0.22)	0.00200243	0.79 (0.05)	0.000143267	0.69 (0.09)	0.000667318	0.81 (0.06)	-2.45205e-05	0.86 (0.03)	0.000223833	0.84 (0.04)	0.000745487
FGF12	E61	4.89545e-05	0.16 (0.03)	-1.65e-05	0.11 (0.04)	1.51922e-05	0.09 (0.03)	0.000168327	0.06 (0.03)	0.000135	0.16 (0.05)	1.19312e-05	0.1 (0.02)	0.000150775	0.14 (0.04)	-3.12e-05	0.35 (0.15)	0.000108942	0.18 (0.04)	6.26761e-05	0.17 (0.03)	1.81667e-05	0.17 (0.09)	3.73458e-05
FGF12	P210	4.71827e-05	0.06 (0.03)	-3.73333e-05	0.07 (0.03)	1.26741e-06	0.04 (0.02)	0.000388244	0.22 (0.12)	6.1e-05	0.05 (0.02)	3.28246e-05	0.09 (0.07)	-3.46143e-05	0.08 (0.02)	2.44667e-05	0.26 (0.18)	2.1376e-05	0.11 (0.05)	0.000116983	0.1 (0.07)	7.5e-06	0.1 (0.1)	3.39197e-05
FGF2	P229	0.000692597	0.18 (0.07)	0.000134833	0.14 (0.05)	2.75881e-05	0.06 (0.02)	0.00252272	0.13 (0.09)	-6.4e-05	0.07 (0.03)	0.000381191	0.2 (0.11)	0.000257897	0.12 (0.04)	-7.64667e-05	0.46 (0.11)	0.00194497	0.18 (0.05)	-2.97534e-05	0.26 (0.2)	6.15e-05	0.2 (0.04)	0.00116885
FGF3	E198	0.000205417	0.02 (0.01)	-6.25e-05	0.01 (0)	9.44777e-05	0.02 (0.01)	9.67254e-05	0.03 (0.01)	2.7e-05	0.02 (0.01)	2.14466e-05	0.03 (0.02)	3.55881e-05	0.03 (0.01)	5.41333e-05	0.03 (0)	2.32646e-05	0.03 (0.02)	-0.000270562	0.03 (0.01)	5.81667e-05	0.03 (0.03)	0.000812236
FGF3	P171	1.9557e-05	0.09 (0.04)	2.73333e-05	0.05 (0.03)	4.95458e-07	0.03 (0.02)	0.000143166	0.06 (0.02)	-1.9e-05	0.05 (0.03)	6.17087e-06	0.08 (0.07)	-2.91238e-05	0.07 (0.04)	6.33333e-07	0.06 (0.02)	5.79293e-07	0.09 (0.05)	4.63404e-05	0.11 (0.08)	1.16667e-05	0.09 (0.07)	2.10592e-05
FGF5	E16	0.00015362	0.06 (0.02)	5.81667e-05	0.04 (0.01)	0.000119245	0.04 (0.02)	0.000138414	0.12 (0.13)	8e-06	0.1 (0.04)	6.69696e-06	0.07 (0.04)	5.17175e-05	0.09 (0.03)	3.02667e-05	0.17 (0.13)	1.1937e-05	0.11 (0.04)	-8.16999e-05	0.14 (0.05)	3.6e-05	0.1 (0.03)	0.000521134
FGF5	P238	6.59438e-05	0.04 (0.01)	6.33333e-06	0.03 (0.01)	7.97587e-06	0.03 (0.01)	3.55833e-05	0.03 (0)	-1.70002e-22	0.03 (0.01)	8.19066e-06	0.04 (0.03)	-1.66198e-05	0.04 (0.01)	-2.96667e-05	0.16 (0.19)	1.65752e-05	0.05 (0.02)	-6.26093e-05	0.09 (0.12)	-2.5e-05	0.05 (0.01)	0.00027073
FGF6	E294	0.000189317	0.93 (0.01)	-9.85e-05	0.93 (0.01)	7.44527e-05	0.94 (0.01)	0.00076672	0.91 (0.03)	-8.3e-05	0.9 (0.03)	4.57518e-05	0.91 (0.01)	0.000916879	0.89 (0.02)	0.000363467	0.88 (0.05)	5.02161e-05	0.92 (0.03)	-7.45839e-05	0.94 (0)	0.000372	0.93 (0.02)	0.000284232
FGF6	P139	0.000536493	0.9 (0.02)	0.000165667	0.95 (0)	0.00182042	0.94 (0.01)	0.000267768	0.89 (0.01)	0.000176	0.91 (0.03)	0.000324691	0.92 (0.01)	0.000125659	0.66 (0.11)	0.0058371	0.82 (0.09)	0.000149135	0.9 (0.03)	0.000119234	0.93 (0.01)	0.0002075	0.91 (0.02)	9.03011e-05
FGF7	P44	6.26672e-05	0.85 (0.1)	3.8e-05	0.92 (0.02)	3.84924e-06	0.85 (0.07)	3.02595e-05	0.88 (0.05)	-3.2e-05	0.93 (0.02)	3.77218e-05	0.86 (0.04)	0.000103614	0.82 (0.06)	0.000461067	0.92 (0.03)	5.6981e-06	0.89 (0.04)	1.13937e-06	0.91 (0.02)	4.83333e-05	0.92 (0.02)	0.000127243
FGF7	P610	2.64982e-05	0.9 (0.02)	-3.15e-05	0.93 (0.01)	2.45082e-05	0.9 (0.04)	-1.10516e-05	0.95 (0.01)	0.000188	0.91 (0.02)	7.78467e-06	0.91 (0.03)	-1.02095e-05	0.88 (0.03)	0.000127633	0.9 (0.03)	-1.31965e-06	0.9 (0.03)	7.37543e-05	0.92 (0)	0.000209	0.91 (0.02)	2.22373e-05
FGF8	E183	0.000269862	0.04 (0.01)	-4.65e-05	0.02 (0.01)	0.000106064	0.02 (0.01)	0.000365129	0.08 (0.07)	5.1e-05	0.04 (0.04)	3.20837e-05	0.03 (0.01)	0.000660225	0.05 (0.01)	0.0001349	0.21 (0.11)	0.000514174	0.07 (0.03)	0.00039624	0.05 (0.01)	0.000161833	0.05 (0.01)	0.000414614
FGF8	P473	0.000793187	0.05 (0.01)	0.000192833	0.02 (0)	0.000911051	0.03 (0.01)	0.00139689	0.05 (0.01)	0.000109	0.05 (0.01)	0.000130378	0.03 (0.01)	0.00340014	0.12 (0.04)	0.00240083	0.13 (0.06)	0.000184115	0.08 (0.04)	0.000532707	0.06 (0.02)	0.0001215	0.06 (0.04)	0.00105983
FGF9	P1404	0.000447059	0.18 (0.03)	1.78333e-05	0.16 (0.03)	1.65738e-05	0.13 (0.04)	0.000352792	0.23 (0.06)	-5.7e-05	0.13 (0.03)	7.9201e-05	0.18 (0.02)	0.000263086	0.21 (0.04)	6.60333e-05	0.25 (0.07)	3.15893e-05	0.22 (0.05)	-0.000330465	0.2 (0.02)	0.000103	0.23 (0.04)	0.00169703
FGF9	P862	4.0025e-05	0.3 (0.06)	-9.78333e-05	0.26 (0.03)	3.53366e-05	0.26 (0.03)	9.44865e-05	0.34 (0.02)	7.2e-05	0.3 (0.04)	9.20875e-06	0.27 (0.02)	0.000117928	0.33 (0.05)	-1.36333e-05	0.39 (0.06)	0.000135294	0.34 (0.05)	6.60685e-05	0.25 (0.03)	0.000202667	0.31 (0.04)	-1.06411e-06
FGFR1	E317	1.85675e-05	0.11 (0.05)	-3.78333e-05	0.08 (0.03)	5.6362e-06	0.08 (0.03)	3.37944e-05	0.07 (0.04)	-9e-06	0.1 (0.03)	2.95492e-06	0.08 (0.01)	5.34762e-05	0.11 (0.05)	-2.11e-05	0.14 (0.05)	2.79447e-06	0.14 (0.04)	0.000189815	0.11 (0.02)	-5.03333e-05	0.11 (0.03)	-2.51636e-06
FGFR1	P204	7.61293e-05	0.1 (0.04)	-5.61667e-05	0.06 (0.02)	2.13674e-05	0.09 (0.04)	2.93492e-06	0.08 (0.08)	-2.1e-05	0.06 (0.06)	9.12491e-06	0.11 (0.09)	7.38095e-08	0.14 (0.04)	4.37667e-05	0.14 (0.1)	-2.36039e-06	0.12 (0.04)	-0.000107615	0.16 (0.08)	0.000158333	0.11 (0.03)	0.000314983
FGFR2	P266	6.48529e-05	0.08 (0.03)	6.83333e-06	0.03 (0.01)	5.21202e-05	0.06 (0.03)	2.28016e-06	0.14 (0.15)	-3.4e-05	0.04 (0.01)	2.02974e-05	0.05 (0.02)	2.12698e-07	0.06 (0.01)	1.18e-05	0.05 (0.01)	5.08528e-05	0.08 (0.02)	0.000124229	0.06 (0.01)	8e-06	0.08 (0.02)	0.000152161
FGFR2	P460	0.000171413	0.44 (0.02)	0.000123667	0.19 (0.04)	0.000566604	0.47 (0.17)	2.96968e-05	0.37 (0.29)	-0.000131	0.4 (0.07)	0.00012753	0.21 (0.1)	0.000585699	0.39 (0.1)	-6.28667e-05	0.51 (0.13)	1.32063e-05	0.52 (0.08)	0.000126302	0.48 (0.02)	0.000169333	0.48 (0.07)	5.32583e-05
FGFR3	E297	0.000158893	0.04 (0.01)	0.000155167	0.03 (0)	8.18579e-05	0.03 (0.01)	1.40579e-05	0.04 (0.01)	8e-06	0.03 (0.01)	1.67817e-05	0.04 (0.01)	1.43286e-05	0.05 (0.01)	1.49e-05	0.05 (0.02)	-2.87631e-06	0.06 (0.02)	0.000305833	0.04 (0.01)	3.5e-06	0.05 (0.01)	0.000460438
FGFR3	P1152	0.000435266	0.51 (0.06)	9.4e-05	0.53 (0.14)	0.000147438	0.52 (0.06)	0.000368973	0.4 (0.04)	6.3e-05	0.25 (0.06)	0.000863375	0.58 (0.06)	0.000898605	0.34 (0.12)	0.000165833	0.21 (0.08)	0.000730478	0.5 (0.09)	0.000396985	0.4 (0.11)	4e-05	0.46 (0.08)	0.000118291
FGFR4	P610	0.00043716	0.85 (0.05)	0.000125833	0.93 (0.01)	0.000736244	0.93 (0.02)	0.00367108	0.48 (0.39)	0.0002	0.88 (0.03)	0.000110017	0.82 (0.08)	0.000787221	0.82 (0.06)	0.000419433	0.86 (0.03)	0.000141273	0.87 (0.02)	0.000190821	0.84 (0.06)	0.0001205	0.87 (0.04)	0.000112805
FGR	P39	4.53955e-05	0.95 (0.01)	2.73333e-05	0.94 (0.02)	1.58838e-05	0.96 (0.03)	5.47357e-05	0.95 (0.02)	-4.7e-05	0.94 (0.02)	3.49717e-05	0.96 (0.01)	7.07262e-05	0.95 (0.01)	7.15333e-05	0.96 (0.01)	4.61512e-06	0.96 (0.02)	0.000210766	0.95 (0.01)	6.11667e-05	0.96 (0.01)	2.94099e-05
FHIT	E19	0.000827231	0.04 (0.01)	0.000364	0.02 (0)	0.00144259	0.02 (0.01)	0.00117638	0.03 (0)	0.000179	0.04 (0.01)	0.000302024	0.02 (0)	0.00296459	0.04 (0.01)	0.000424267	0.04 (0.01)	8.49581e-05	0.04 (0.01)	5.50929e-05	0.04 (0.01)	0.000273667	0.04 (0.01)	0.00125104
FHIT	P93	0.000136022	0.05 (0.02)	-1e-05	0.02 (0.01)	7.19353e-05	0.03 (0.02)	0.000594358	0.03 (0)	6e-05	0.05 (0.02)	3.05932e-05	0.03 (0.01)	0.000166635	0.05 (0.02)	1.06667e-06	0.06 (0.05)	9.78314e-06	0.07 (0.04)	0.000223949	0.04 (0.01)	0.000110667	0.05 (0.01)	0.000213078
FLI1	E29	0.000336608	0.18 (0.06)	-2.71667e-05	0.05 (0.01)	0.000662738	0.09 (0.1)	6.38825e-05	0.1 (0.09)	-3.6e-05	0.12 (0.04)	0.000107475	0.08 (0.03)	0.000380774	0.14 (0.05)	-5.86333e-05	0.3 (0.18)	3.9736e-05	0.19 (0.05)	-0.000128213	0.25 (0.19)	7.88333e-05	0.17 (0.03)	0.000841604
FLI1	P620	0.00024491	0.12 (0.04)	2.5e-06	0.04 (0.02)	4.05947e-05	0.07 (0.05)	2.88429e-05	0.06 (0.01)	0.000154	0.06 (0.04)	1.44024e-05	0.06 (0.02)	0.000136213	0.12 (0.04)	7.45e-05	0.19 (0.16)	1.4102e-06	0.11 (0.03)	-0.000199773	0.15 (0.1)	-4.01667e-05	0.13 (0.04)	0.000999159
FLJ20712	P984	0.00189041	0.72 (0.05)	-0.000149	0.86 (0.03)	0.00109694	0.75 (0.09)	0.000580306	0.74 (0.1)	-0.000233	0.71 (0.1)	4.99528e-05	0.81 (0.03)	0.00362688	0.73 (0.04)	0.000872333	0.75 (0.09)	0.00074103	0.68 (0.13)	-0.000293995	0.76 (0.04)	0.00112617	0.59 (0.09)	0.00586125
FLT1	E444	5.55981e-05	0.04 (0.02)	-6.08333e-05	0.03 (0.01)	8.55208e-06	0.03 (0.02)	4.33111e-05	0.03 (0)	6.3e-05	0.03 (0.01)	1.24271e-06	0.04 (0.02)	3.41881e-05	0.04 (0.01)	1.56667e-06	0.04 (0.02)	-3.8148e-07	0.05 (0.02)	-6.36734e-05	0.04 (0.01)	2.15e-05	0.04 (0.01)	0.000224779
FLT1	P302	0.000409641	0.09 (0.02)	0.000393167	0.03 (0.02)	2.49977e-05	0.03 (0.01)	0.000704786	0.04 (0)	0.000204	0.04 (0.02)	1.36384e-05	0.06 (0.03)	0.0001408	0.08 (0.04)	-8.42333e-05	0.07 (0.05)	-1.26349e-06	0.08 (0.03)	-0.000333204	0.06 (0.02)	-9.78333e-05	0.09 (0.03)	0.00158767
FLT1	P615	2.07611e-05	0.07 (0.02)	-4.15e-05	0.06 (0.02)	8.69171e-07	0.11 (0.05)	4.38429e-05	0.06 (0.04)	3.4e-05	0.05 (0.02)	4.45906e-06	0.06 (0.04)	-1.16492e-05	0.08 (0.02)	2.9e-06	0.04 (0.01)	5.82195e-05	0.11 (0.07)	8.11149e-05	0.1 (0.06)	-4.16667e-06	0.08 (0.04)	2.43608e-05
FLT3	E326	6.53194e-05	0.08 (0.05)	-2.83333e-05	0.04 (0.02)	2.0778e-05	0.09 (0.13)	1.10429e-05	0.03 (0)	0.000132	0.07 (0.03)	2.93709e-06	0.18 (0.14)	7.30246e-05	0.09 (0.04)	2.03333e-06	0.07 (0.04)	-2.37787e-06	0.12 (0.08)	0.000173798	0.08 (0.06)	-8.81667e-05	0.09 (0.02)	0.000175672
FLT3	P302	0.000155033	0.08 (0.05)	-6.28333e-05	0.04 (0.02)	1.45702e-05	0.08 (0.09)	-3.85635e-06	0.04 (0)	0.000141	0.05 (0.03)	1.97834e-05	0.07 (0.02)	0.00012134	0.1 (0.06)	-3.96667e-06	0.09 (0.07)	-1.42872e-06	0.09 (0.03)	-0.00010188	0.07 (0.02)	-9.33333e-05	0.09 (0.03)	0.00062799
FLT4	E206	0.000265714	0.13 (0.02)	4.45e-05	0.06 (0.02)	0.000576295	0.07 (0.05)	0.000250462	0.04 (0.01)	0.000271	0.18 (0.04)	0.000161252	0.07 (0.02)	0.000433698	0.12 (0.03)	0.000208367	0.19 (0.06)	3.8307e-05	0.18 (0.05)	0.000257343	0.13 (0.01)	0.000242833	0.14 (0.03)	0.000264597
FLT4	P180	2.23624e-05	0.08 (0.01)	9.66667e-06	0.04 (0.01)	3.49792e-05	0.06 (0.05)	1.14563e-05	0.12 (0.09)	1.8e-05	0.06 (0.02)	9.24758e-06	0.06 (0.03)	1.01111e-05	0.07 (0.02)	-6.42667e-05	0.08 (0.03)	-4.22157e-06	0.12 (0.12)	4.0231e-05	0.1 (0.05)	2.23333e-05	0.08 (0.01)	4.74548e-05
FN1	E469	1.04343e-05	0.05 (0.03)	-1.16667e-06	0.04 (0.01)	1.57917e-05	0.04 (0.01)	5.3923e-05	0.06 (0.06)	1.6e-05	0.07 (0.03)	3.63186e-07	0.06 (0.03)	3.34762e-06	0.06 (0.02)	-8.4e-06	0.05 (0.03)	1.50483e-06	0.07 (0.05)	-5.42835e-06	0.05 (0.02)	1.41667e-05	0.06 (0.02)	1.99262e-05
FN1	P229	0.000175703	0.1 (0.02)	-3.66667e-06	0.1 (0.03)	1.35497e-05	0.17 (0.09)	2.55389e-05	0.1 (0.11)	3.6e-05	0.16 (0.06)	1.42662e-05	0.12 (0.02)	7.77524e-05	0.13 (0.05)	7.74667e-05	0.11 (0.05)	7.24019e-06	0.08 (0.03)	9.49755e-05	0.12 (0.04)	-0.000126667	0.08 (0.02)	0.00065359
FOLR1	E368	0.000563135	0.91 (0.02)	0.000132333	0.96 (0)	0.00220479	0.94 (0.01)	0.000508634	0.93 (0.02)	-9.5e-05	0.94 (0.02)	2.47507e-05	0.93 (0.02)	0.000347962	0.82 (0.06)	0.00173173	0.84 (0.05)	0.000632228	0.93 (0.02)	5.00292e-05	0.94 (0.01)	0.000236167	0.91 (0.03)	0.000405472
FOSL2	E384	0.00194181	0.94 (0.02)	0.000926167	0.93 (0.03)	0.000511985	0.88 (0.06)	0.00136531	0.93 (0.02)	0.000497	0.92 (0.03)	0.000104169	0.92 (0.02)	0.00311542	0.96 (0.01)	0.000104667	0.96 (0.01)	5.86272e-05	0.97 (0.01)	-0.000478488	0.96 (0.01)	-0.000649167	0.97 (0.01)	0.0067341
FRK	P258	0.00062802	0.75 (0.06)	0.000161167	0.91 (0.02)	0.000745411	0.84 (0.06)	0.000202244	0.46 (0.34)	0.000108	0.91 (0.03)	0.000746933	0.59 (0.15)	0.000792704	0.51 (0.15)	0.000870867	0.3 (0.15)	0.00114919	0.74 (0.07)	0.000429345	0.73 (0.16)	0.000126333	0.74 (0.07)	0.000478079
FRK	P36	0.000620847	0.66 (0.12)	0.000106167	0.91 (0.04)	0.00181554	0.77 (0.1)	0.000185685	0.35 (0.32)	0.000144	0.84 (0.05)	0.000234488	0.52 (0.16)	0.000612957	0.38 (0.18)	0.000614467	0.33 (0.12)	0.000833532	0.63 (0.1)	0.000324838	0.68 (0.18)	5.85e-05	0.65 (0.09)	0.000580712
FRZB	E186	0.000154857	0.11 (0.05)	8.66667e-06	0.13 (0.04)	3.31821e-06	0.12 (0.02)	0.000358702	0.1 (0.06)	-4.6e-05	0.09 (0.03)	0.000220411	0.19 (0.06)	0.000509705	0.13 (0.03)	-1.94333e-05	0.46 (0.2)	0.00032912	0.18 (0.06)	3.32885e-05	0.34 (0.31)	5.28333e-05	0.17 (0.07)	9.41225e-05
FRZB	P406	6.48798e-05	0.06 (0.03)	-5.75e-05	0.04 (0.01)	1.3602e-05	0.04 (0.01)	0.000463658	0.04 (0)	0.000124	0.06 (0.03)	-7.07828e-07	0.05 (0.01)	0.000333669	0.06 (0.02)	-1.57e-05	0.09 (0.08)	2.05149e-06	0.07 (0.02)	7.11058e-05	0.09 (0.07)	5.46667e-05	0.06 (0.01)	5.57857e-05
FVT1	P225	0.000169294	0.09 (0.02)	9.78333e-05	0.04 (0.01)	0.000338899	0.05 (0.01)	0.000326706	0.08 (0.04)	-7.2e-05	0.07 (0.02)	5.09826e-05	0.05 (0.01)	0.000828043	0.1 (0.05)	-7.03e-05	0.11 (0.03)	4.93283e-05	0.11 (0.03)	0.000205153	0.09 (0.02)	2.98333e-05	0.09 (0.05)	0.000115812
FYN	P352	0.000450586	0.04 (0.01)	0.000322667	0.02 (0.01)	0.000454452	0.03 (0.01)	0.000478658	0.03 (0)	0.000226	0.05 (0.02)	9.68861e-05	0.03 (0.01)	0.000580837	0.07 (0.02)	0.0001354	0.09 (0.03)	7.57584e-05	0.09 (0.02)	0.00137506	0.05 (0.02)	2.1e-05	0.07 (0.03)	0.000678076
FZD7	E296	3.98921e-05	0.05 (0.02)	-4.81667e-05	0.03 (0.01)	5.76773e-05	0.03 (0.01)	2.0796e-05	0.04 (0.01)	-1.3e-05	0.04 (0.01)	6.66694e-06	0.05 (0.04)	-1.61905e-06	0.05 (0.02)	2.33333e-06	0.04 (0.01)	8.35325e-06	0.05 (0.02)	-5.38982e-05	0.05 (0.01)	-4.75e-05	0.05 (0.01)	0.000142662
FZD9	E458	0.000496589	0.25 (0.08)	-0.000144167	0.2 (0.1)	1.24914e-05	0.19 (0.18)	0.000124387	0.25 (0.08)	-4e-06	0.13 (0.03)	0.00055357	0.29 (0.1)	-1.15984e-05	0.28 (0.09)	-4.04667e-05	0.24 (0.07)	4.54086e-05	0.44 (0.14)	0.000595114	0.39 (0.26)	8.33333e-07	0.38 (0.09)	0.00128041
FZD9	P15	8.76822e-05	0.09 (0.06)	-5.93333e-05	0.02 (0.01)	5.63535e-05	0.03 (0.02)	7.69611e-05	0.04 (0.01)	4.8e-05	0.07 (0.04)	2.90098e-06	0.03 (0.01)	0.000212507	0.09 (0.05)	-3.23333e-05	0.09 (0.05)	2.57792e-07	0.09 (0.04)	-4.61538e-05	0.07 (0.02)	-4e-06	0.08 (0.05)	0.0002791
FZD9	P175	0.000289927	0.34 (0.05)	0.0001995	0.14 (0.02)	0.000182706	0.12 (0.06)	0.000623814	0.41 (0.2)	4.6e-05	0.22 (0.04)	4.29022e-05	0.14 (0.04)	0.000811206	0.3 (0.08)	8.51e-05	0.36 (0.1)	3.46114e-05	0.38 (0.07)	0.0010463	0.34 (0.02)	0.000210833	0.31 (0.05)	0.000296276
GABRA5	E44	0.000342523	0.78 (0.03)	0.000180833	0.78 (0.04)	8.47336e-06	0.77 (0.04)	0.000152339	0.85 (0.05)	0.000214	0.73 (0.06)	3.13581e-06	0.81 (0.03)	0.000570627	0.75 (0.08)	0.0003148	0.62 (0.09)	0.000201294	0.67 (0.11)	0.00205447	0.8 (0.02)	0.000557333	0.76 (0.05)	0.000362875
GABRA5	P1016	0.000374063	0.93 (0.01)	0.0002435	0.9 (0.03)	4.08638e-05	0.91 (0.03)	1.80508e-05	0.92 (0.02)	7e-05	0.93 (0.02)	4.17591e-05	0.88 (0.02)	0.00124559	0.93 (0.02)	0.000312533	0.69 (0.13)	0.00226499	0.93 (0.05)	0.000265882	0.94 (0.01)	0.0001695	0.94 (0.02)	0.000202564
GABRA5	P862	8.8606e-05	0.89 (0.01)	0.000297167	0.91 (0.03)	6.90318e-06	0.92 (0.02)	7.44413e-05	0.84 (0.08)	1.1e-05	0.91 (0.02)	1.65601e-05	0.88 (0.03)	0.000258115	0.9 (0.02)	7.20333e-05	0.71 (0.13)	0.000415017	0.91 (0.1)	0.00025179	0.92 (0.01)	7.5e-06	0.92 (0.03)	-1.53365e-05
GABRB3	E42	9.55256e-05	0.08 (0.03)	-1.05e-05	0.05 (0.02)	3.09246e-05	0.04 (0.03)	0.000266417	0.09 (0.09)	-7e-06	0.09 (0.03)	1.09935e-05	0.07 (0.05)	3.28992e-05	0.07 (0.02)	0.000306967	0.18 (0.12)	2.55857e-05	0.16 (0.08)	0.000533336	0.21 (0.21)	1.75e-05	0.11 (0.05)	7.39255e-05
GABRB3	P92	6.98223e-05	0.22 (0.05)	2.51667e-05	0.15 (0.05)	1.73917e-05	0.13 (0.02)	0.000568375	0.22 (0.01)	8.8e-05	0.18 (0.04)	1.19928e-05	0.17 (0.06)	-5.31746e-07	0.19 (0.03)	2.87667e-05	0.29 (0.09)	0.000127777	0.21 (0.04)	5.38287e-05	0.27 (0.15)	6.55e-05	0.2 (0.05)	5.1445e-05
GABRG3	E123	0.000660768	0.93 (0.01)	4.16667e-05	0.97 (0.01)	0.0023669	0.95 (0.03)	0.000422287	0.92 (0.02)	1.3e-05	0.91 (0.02)	0.000616586	0.86 (0.08)	0.000142848	0.92 (0.03)	8.50667e-05	0.78 (0.07)	0.00104052	0.91 (0.05)	8.79602e-05	0.94 (0)	0.000173667	0.93 (0.02)	0.000153861
GABRG3	P75	0.000524741	0.84 (0.03)	8.95e-05	0.83 (0.04)	2.21692e-05	0.83 (0.03)	0.000333783	0.9 (0.06)	0.000107	0.83 (0.03)	3.75881e-05	0.82 (0.03)	0.000277114	0.83 (0.03)	0.000139833	0.54 (0.1)	0.0048278	0.8 (0.08)	-8.88937e-05	0.86 (0.02)	0.000114833	0.85 (0.03)	0.000281547
GADD45A	P737	0.00035854	0.39 (0.07)	7.76667e-05	0.11 (0.04)	0.000478146	0.21 (0.11)	0.000445862	0.29 (0.11)	-1.7e-05	0.26 (0.05)	0.00014335	0.27 (0.06)	0.0001819	0.36 (0.06)	0.000202567	0.68 (0.1)	0.00171846	0.43 (0.1)	0.000322361	0.38 (0.07)	0.0001175	0.39 (0.08)	0.000109118
GALR1	E52	0.000123792	0.13 (0.05)	4.48333e-05	0.03 (0.01)	4.60331e-05	0.03 (0.03)	0.000823271	0.07 (0.06)	-5e-06	0.09 (0.03)	3.15484e-05	0.06 (0.04)	-2.60429e-05	0.09 (0.04)	-2.23e-05	0.32 (0.16)	0.000283469	0.14 (0.04)	0.000276598	0.1 (0.04)	4.01667e-05	0.11 (0.06)	5.50151e-05
GALR1	P80	0.000588938	0.05 (0.02)	-1.51667e-05	0.02 (0.01)	0.00217711	0.03 (0.02)	0.000530712	0.05 (0.01)	-8e-06	0.07 (0.02)	0.000533997	0.04 (0.01)	0.000318308	0.07 (0.01)	0.000106367	0.11 (0.05)	5.51079e-05	0.09 (0.03)	0.000147086	0.07 (0.01)	2.68333e-05	0.08 (0.03)	0.00034333
GAS1	E22	0.000128031	0.04 (0.01)	-4.16667e-05	0.01 (0)	0.000143589	0.02 (0.01)	0.000306561	0.05 (0.04)	-1.1e-05	0.03 (0.01)	1.04924e-05	0.02 (0)	0.000458925	0.03 (0.01)	6.48e-05	0.04 (0.02)	2.31858e-05	0.05 (0.02)	0.000444874	0.03 (0.01)	-4.8e-05	0.03 (0.01)	0.000103367
GAS1	P754	0.000169737	0.03 (0.01)	1.13333e-05	0.01 (0)	0.000274307	0.02 (0.01)	0.000954719	0.03 (0)	8.7e-05	0.02 (0.01)	4.0049e-06	0.02 (0)	0.000373754	0.03 (0.01)	7.31333e-05	0.05 (0.03)	4.99279e-05	0.05 (0.01)	0.000323084	0.03 (0.01)	2.88333e-05	0.04 (0.01)	0.000109798
GAS7	E148	0.000159323	0.08 (0.03)	-4.51667e-05	0.02 (0)	0.000209415	0.04 (0.03)	8.04246e-05	0.1 (0.07)	-3.1e-05	0.05 (0.02)	1.24116e-05	0.04 (0.03)	8.94595e-05	0.07 (0.01)	7.6e-05	0.09 (0.05)	1.07256e-05	0.09 (0.03)	-0.000128225	0.19 (0.24)	3.55e-05	0.08 (0.04)	0.000523174
GAS7	P622	8.58225e-05	0.26 (0.1)	3.66667e-06	0.12 (0.04)	0.000119667	0.28 (0.08)	3.12087e-05	0.26 (0.39)	-2.7e-05	0.23 (0.08)	3.86829e-06	0.25 (0.11)	9.04127e-06	0.29 (0.13)	-3.40333e-05	0.15 (0.13)	9.33484e-06	0.28 (0.07)	-5.41078e-05	0.5 (0.28)	8.88333e-05	0.3 (0.07)	0.000290347
			Bladder (n=5)		Blood (n=30)		Brain (n=12)		Cervix (n=3)		Infant blood (n=55)		Head and neck (n=11)		Kidney (n=6)		Placenta (n=19)		Pleura (n=18)		Small intestine (n=5)		Lung (n=53)
GENE	CpG	Mean decrease in accuracy	Mean (sd)	Decrease in accuracy	Mean (sd)	Decrease in accuracy	Mean (sd)	Decrease in accuracy	Mean (sd)	Decrease in accuracy	Mean (sd)	Decrease in accuracy	Mean (sd)	Decrease in accuracy	Mean (sd)	Decrease in accuracy	Mean (sd)	Decrease in accuracy	Mean (sd)	Decrease in accuracy	Mean (sd)	Decrease in accuracy	Mean (sd)	Decrease in accuracy
GATA6	P21	0.00096957	0.09 (0.03)	0.00012	0.02 (0)	0.0033577	0.07 (0.1)	0.000255569	0.11 (0.08)	-0.000243	0.12 (0.03)	0.000760791	0.04 (0.01)	0.00216978	0.09 (0.02)	0.000490067	0.17 (0.06)	0.000113952	0.17 (0.05)	0.00134429	0.1 (0.02)	0.000186	0.12 (0.03)	0.000272714
GATA6	P726	3.41168e-05	0.08 (0.04)	8.31667e-05	0.05 (0.02)	1.85382e-06	0.05 (0.05)	1.44746e-05	0.06 (0.05)	1.8e-05	0.04 (0.01)	4.98804e-05	0.1 (0.09)	-1.25238e-06	0.05 (0.02)	1.58e-05	0.08 (0.06)	1.29846e-06	0.09 (0.04)	-2.08841e-05	0.08 (0.03)	-1.25e-05	0.08 (0.03)	7.89834e-05
GDF10	E39	0.000137842	0.29 (0.04)	0.000107833	0.2 (0.03)	5.0763e-05	0.19 (0.06)	0.000210757	0.4 (0.06)	0.000186	0.27 (0.05)	6.48177e-06	0.2 (0.03)	0.000838124	0.32 (0.05)	6.89333e-05	0.38 (0.09)	7.98348e-05	0.32 (0.07)	7.92394e-05	0.25 (0.02)	5.16667e-05	0.3 (0.05)	0.000198567
GDF10	P95	0.000131418	0.13 (0.03)	-4.53333e-05	0.1 (0.05)	1.02644e-05	0.08 (0.04)	8.88008e-05	0.13 (0.06)	-5.6e-05	0.12 (0.02)	1.85985e-05	0.1 (0.04)	7.46341e-05	0.16 (0.03)	0.000128767	0.21 (0.08)	7.32806e-05	0.17 (0.03)	0.000423552	0.14 (0.02)	-5.5e-06	0.14 (0.02)	0.000293919
GFAP	P1214	0.000676277	0.88 (0.02)	5.88333e-05	0.95 (0.01)	0.00324954	0.9 (0.04)	0.000128472	0.85 (0.04)	5e-05	0.88 (0.02)	0.00053659	0.9 (0.02)	2.25786e-05	0.88 (0.04)	0.000113033	0.89 (0.04)	0.000169703	0.89 (0.02)	0.000145181	0.9 (0.02)	2.46667e-05	0.9 (0.02)	0.00022225
GFAP	P56	0.000421279	0.78 (0.05)	-1.1e-05	0.91 (0.02)	0.00187531	0.68 (0.15)	0.000223276	0.47 (0.3)	0.000108	0.79 (0.04)	0.000187348	0.81 (0.05)	7.5419e-05	0.76 (0.05)	0.000135867	0.72 (0.08)	0.00021468	0.75 (0.04)	0.000322041	0.83 (0.03)	0.000115333	0.79 (0.05)	0.000172931
GFI1	E136	6.31218e-05	0.13 (0.04)	-2.53333e-05	0.15 (0.1)	3.72056e-06	0.23 (0.11)	5.41825e-06	0.04 (0)	0.000263	0.14 (0.06)	-3.92529e-07	0.18 (0.07)	8.34127e-07	0.13 (0.08)	-3.39333e-05	0.1 (0.05)	8.49699e-06	0.22 (0.12)	4.73758e-05	0.11 (0.04)	5.9e-05	0.19 (0.07)	0.000213453
GFI1	P208	0.000381785	0.51 (0.06)	0.0003335	0.35 (0.13)	4.02754e-05	0.84 (0.08)	0.00121092	0.48 (0.25)	-0.000189	0.33 (0.12)	6.55262e-05	0.7 (0.13)	0.000418994	0.69 (0.07)	0.000731367	0.24 (0.09)	0.000747082	0.64 (0.14)	0.000330485	0.44 (0.1)	0.000145	0.61 (0.08)	0.00059583
GFI1	P45	0.000246174	0.07 (0.01)	0.0002595	0.03 (0.01)	0.000171017	0.04 (0.04)	0.000171894	0.07 (0.04)	-0.000108	0.08 (0.03)	0.000105623	0.03 (0.01)	0.000906258	0.09 (0.02)	-0.000128867	0.14 (0.05)	5.78752e-05	0.14 (0.05)	0.00150118	0.09 (0.02)	-0.000142833	0.09 (0.03)	6.96944e-05
GJB2	E43	2.02936e-05	0.06 (0.02)	-4.5e-06	0.05 (0.04)	4.09996e-06	0.04 (0.02)	7.13627e-05	0.04 (0)	7.1e-05	0.06 (0.03)	5.91808e-07	0.07 (0.04)	1.07873e-05	0.06 (0.04)	-4.95e-05	0.15 (0.13)	1.05496e-05	0.08 (0.03)	4.19763e-05	0.05 (0.03)	-2.38333e-05	0.09 (0.04)	4.52191e-05
GJB2	P791	0.000163857	0.08 (0.02)	0.000458	0.04 (0.01)	0.000192052	0.08 (0.05)	5.78652e-05	0.17 (0.15)	-0.000161	0.11 (0.03)	4.32314e-05	0.06 (0.02)	0.000305524	0.15 (0.05)	0.000217933	0.29 (0.08)	0.000723504	0.15 (0.06)	7.66248e-05	0.11 (0.03)	-2.25e-05	0.13 (0.04)	9.1809e-05
GJB2	P931	0.00175	0.46 (0.06)	0.000415333	0.09 (0.04)	0.00259104	0.56 (0.06)	0.00174346	0.06 (0.01)	0.000873	0.15 (0.05)	0.00189137	0.4 (0.14)	0.000442658	0.56 (0.09)	0.000775367	0.78 (0.07)	0.0043583	0.44 (0.1)	0.000752043	0.4 (0.12)	0.000359667	0.38 (0.08)	0.0012845
GLI2	E90	0.00043419	0.94 (0.02)	3.31667e-05	0.97 (0)	0.000677078	0.93 (0.02)	0.000236762	0.72 (0.05)	0.000658	0.96 (0.01)	5.2786e-05	0.86 (0.1)	0.000792347	0.85 (0.05)	0.0022922	0.76 (0.12)	0.00106023	0.95 (0.01)	0.000244506	0.95 (0.01)	6.1e-05	0.95 (0.01)	0.000330835
GLI2	P295	0.000412761	0.84 (0.03)	4.78333e-05	0.94 (0.01)	0.000998498	0.91 (0.06)	0.0013645	0.54 (0.2)	0.000197	0.88 (0.02)	0.000286995	0.76 (0.14)	0.00030641	0.72 (0.11)	0.000400533	0.67 (0.11)	0.000334516	0.8 (0.03)	0.000506099	0.86 (0.02)	0.0002195	0.82 (0.05)	9.89298e-05
GLI3	E148	0.000111724	0.92 (0.03)	-3.86667e-05	0.96 (0.01)	0.000233369	0.94 (0.03)	4.13667e-05	0.88 (0.04)	5.6e-05	0.89 (0.02)	0.000232383	0.94 (0.02)	3.71667e-05	0.93 (0.02)	-1.77e-05	0.89 (0.02)	5.93334e-05	0.92 (0.02)	3.30505e-06	0.93 (0.01)	5.73333e-05	0.93 (0.02)	3.20809e-05
GLI3	P453	3.73502e-05	0.18 (0.12)	-8.13333e-05	0.1 (0.04)	2.42589e-05	0.11 (0.07)	1.67643e-05	0.11 (0.12)	2.9e-05	0.16 (0.06)	-1.51044e-06	0.1 (0.04)	0.000109463	0.18 (0.06)	-1.06333e-05	0.23 (0.08)	4.43543e-06	0.22 (0.04)	0.00010575	0.2 (0.03)	4.68333e-05	0.19 (0.04)	7.4822e-05
GML	E144	1.25433e-05	0.69 (0.28)	-4.36667e-05	0.88 (0.11)	9.03882e-06	0.77 (0.23)	7.43968e-06	0.69 (0.36)	-3e-05	0.74 (0.23)	6.62499e-06	0.87 (0.14)	3.26516e-05	0.72 (0.31)	-2.43667e-05	0.59 (0.24)	5.12488e-05	0.83 (0.17)	7.00668e-05	0.59 (0.29)	5.5e-06	0.73 (0.25)	-2.09761e-06
GML	P281	0.00223094	0.89 (0.05)	0.000346667	0.97 (0)	0.00708836	0.95 (0.02)	0.00257669	0.88 (0.06)	0.000134	0.87 (0.04)	0.000989117	0.93 (0.02)	0.00091353	0.9 (0.03)	0.0007399	0.61 (0.11)	0.00699125	0.88 (0.06)	0.000411713	0.91 (0.03)	0.000248833	0.91 (0.03)	0.000822472
GNAS	E58	1.43005e-05	0.89 (0.01)	1.85e-05	0.85 (0.08)	3.61694e-06	0.85 (0.04)	7.40794e-06	0.8 (0.15)	-3.1e-05	0.85 (0.05)	1.61746e-05	0.86 (0.02)	8.28476e-05	0.87 (0.04)	-1.44e-05	0.89 (0.04)	1.00864e-05	0.88 (0.02)	1.88734e-05	0.87 (0.07)	-4.3e-05	0.89 (0.02)	1.37706e-05
GNAS	P86	9.63888e-05	0.72 (0.02)	0.000186833	0.77 (0.03)	1.24957e-05	0.75 (0.03)	-6.2273e-05	0.7 (0.09)	3.7e-05	0.69 (0.05)	2.54749e-05	0.8 (0.02)	0.00152332	0.73 (0.05)	-5.93333e-05	0.73 (0.08)	2.55543e-06	0.75 (0.03)	5.51796e-05	0.72 (0.02)	0.000116833	0.74 (0.05)	2.54264e-05
GNG7	E310	0.000795706	0.94 (0.02)	0.000373667	0.98 (0)	0.00331926	0.96 (0.01)	5.02698e-05	0.95 (0.03)	-5.1e-05	0.95 (0.02)	0.00112088	0.97 (0)	0.000120489	0.95 (0.01)	8.38667e-05	0.94 (0.04)	4.88392e-05	0.97 (0.01)	6.66553e-05	0.96 (0)	0.000110333	0.97 (0.01)	9.90077e-05
GNG7	P903	9.5627e-05	0.83 (0.02)	0.0008995	0.93 (0.01)	0.000121361	0.9 (0.02)	2.7669e-05	0.87 (0.06)	-0.000105	0.89 (0.02)	1.41318e-05	0.88 (0.03)	1.5e-06	0.85 (0.03)	0.000231267	0.84 (0.05)	7.35368e-05	0.9 (0.02)	2.90894e-05	0.84 (0.07)	0.000127	0.91 (0.02)	0.000150958
GNMT	E126	8.83247e-05	0.07 (0.03)	-2.58333e-05	0.02 (0.01)	0.000342912	0.04 (0.02)	1.65389e-05	0.06 (0.01)	2e-06	0.05 (0.02)	2.6756e-05	0.05 (0.02)	4.1031e-05	0.06 (0.01)	4.72333e-05	0.09 (0.05)	5.30512e-05	0.08 (0.01)	0.00013544	0.07 (0.01)	-5.8e-05	0.06 (0.01)	6.15316e-05
GNMT	P197	0.000140197	0.2 (0.07)	-6.05e-05	0.16 (0.04)	0.000191375	0.2 (0.05)	2.73341e-05	0.13 (0.07)	0.000104	0.28 (0.04)	0.000325572	0.15 (0.04)	0.000162819	0.23 (0.06)	-4.85e-05	0.32 (0.08)	2.38123e-05	0.29 (0.05)	0.000131759	0.21 (0.06)	-2.13333e-05	0.23 (0.05)	3.44696e-05
GP1BB	E23	0.00229041	0.25 (0.1)	0.000127	0.03 (0.01)	0.00544921	0.64 (0.1)	0.00442216	0.08 (0.05)	0.000127	0.08 (0.02)	0.00200409	0.52 (0.18)	0.00213794	0.31 (0.09)	0.0011106	0.23 (0.07)	0.0014237	0.28 (0.11)	0.000793551	0.33 (0.14)	0.000553667	0.25 (0.07)	0.00192765
GP1BB	P278	0.00651677	0.44 (0.15)	0.000937667	0.06 (0.02)	0.00562784	0.65 (0.09)	0.00521718	0.35 (0.32)	0.000151	0.03 (0.01)	0.011923	0.71 (0.13)	0.00565623	0.37 (0.16)	0.00211313	0.24 (0.11)	0.00557151	0.54 (0.13)	0.00335347	0.41 (0.12)	0.00112417	0.42 (0.1)	0.00537972
GPATC3	P410	4.67976e-05	0.79 (0.04)	-1.58333e-05	0.62 (0.18)	8.73058e-06	0.79 (0.04)	5.61825e-05	0.82 (0.08)	-2.6e-05	0.66 (0.07)	0.000107649	0.84 (0.07)	3.3419e-05	0.83 (0.05)	0.000162	0.77 (0.09)	-2.90765e-08	0.85 (0.05)	0.000118	0.82 (0.05)	1.86667e-05	0.82 (0.06)	4.92243e-06
GPR116	E328	0.00111522	0.93 (0.02)	0.000402	0.98 (0)	0.00211938	0.95 (0.01)	0.000492239	0.94 (0.02)	4.9e-05	0.96 (0.01)	4.25523e-05	0.93 (0.03)	0.000468787	0.91 (0.04)	0.000872267	0.61 (0.15)	0.00550076	0.94 (0.02)	0.000395281	0.96 (0.01)	0.000604333	0.93 (0.02)	0.000860498
GPR116	P850	6.5246e-05	0.91 (0.05)	-5.73333e-05	0.96 (0.01)	0.000125447	0.95 (0.02)	0.00011011	0.94 (0.02)	-1.3e-05	0.94 (0.02)	3.7847e-06	0.93 (0.01)	5.06238e-05	0.92 (0.02)	-1.99e-05	0.94 (0.03)	9.24791e-06	0.92 (0.02)	3.75421e-05	0.94 (0.01)	5.03333e-05	0.91 (0.02)	0.000139205
GPX1	E46	8.85561e-05	0.04 (0.01)	-2.4e-05	0.02 (0.01)	4.87177e-05	0.02 (0.01)	7.14683e-05	0.03 (0)	6e-06	0.05 (0.02)	4.19236e-06	0.03 (0.01)	7.59524e-06	0.03 (0)	1.08667e-05	0.04 (0.02)	2.03203e-06	0.04 (0.01)	-0.0001125	0.03 (0.01)	-1.81667e-05	0.03 (0.01)	0.000352194
GPX1	P194	4.78258e-05	0.1 (0.05)	-3.2e-05	0.15 (0.05)	2.23406e-06	0.1 (0.04)	-4.88175e-06	0.06 (0.02)	7.5e-05	0.24 (0.1)	9.62665e-05	0.06 (0.03)	0.000144263	0.09 (0.02)	5.39e-05	0.18 (0.1)	7.88384e-07	0.12 (0.04)	7.15231e-06	0.13 (0.04)	-5.01667e-05	0.12 (0.03)	5.8258e-05
GPX3	E178	0.000154616	0.16 (0.02)	0.0001185	0.09 (0.02)	6.21965e-05	0.1 (0.03)	0.00023802	0.11 (0.02)	8e-06	0.13 (0.02)	2.9832e-05	0.1 (0.02)	0.000724294	0.15 (0.02)	0.000126867	0.23 (0.08)	6.29595e-05	0.2 (0.05)	0.000364356	0.18 (0.02)	0.0001955	0.17 (0.03)	0.000162613
GRB10	E85	0.000148161	0.08 (0.02)	-6.01667e-05	0.03 (0.01)	0.000142251	0.04 (0.03)	0.000115846	0.04 (0.01)	0.000159	0.08 (0.03)	1.82375e-05	0.05 (0.03)	0.000152798	0.09 (0.02)	2.97333e-05	0.1 (0.04)	5.17056e-06	0.11 (0.03)	-4.65555e-05	0.1 (0.01)	6.4e-05	0.1 (0.02)	0.000444193
GRB10	P260	7.11137e-05	0.05 (0.01)	8e-06	0.02 (0.01)	0.000105078	0.06 (0.04)	9.13651e-06	0.05 (0.01)	1.6e-05	0.06 (0.02)	1.04357e-05	0.06 (0.06)	6.59603e-06	0.06 (0.03)	2.07e-05	0.06 (0.03)	1.709e-06	0.06 (0.02)	-0.000118842	0.04 (0.01)	1.2e-05	0.05 (0.02)	0.000259835
GRB10	P496	0.000351216	0.25 (0.04)	0.000154333	0.27 (0.07)	1.05739e-05	0.77 (0.14)	0.00548529	0.27 (0.23)	-1.2e-05	0.22 (0.08)	3.26459e-05	0.39 (0.09)	0.000252713	0.34 (0.08)	0.000209	0.45 (0.1)	0.000131228	0.32 (0.12)	4.51617e-05	0.26 (0.06)	4e-05	0.27 (0.07)	8.81639e-05
GRB7	E71	0.000478605	0.17 (0.1)	-0.000109167	0.36 (0.1)	0.00113644	0.1 (0.06)	0.000185993	0.18 (0.13)	-7.5e-05	0.12 (0.04)	0.000754636	0.22 (0.13)	-1.64008e-05	0.11 (0.08)	0.000215467	0.07 (0.03)	0.000362431	0.2 (0.06)	7.29737e-05	0.21 (0.07)	-1.28333e-05	0.22 (0.08)	0.000326551
GRB7	P160	8.71237e-05	0.34 (0.08)	-9.73333e-05	0.57 (0.11)	0.000100233	0.51 (0.09)	0.000353748	0.26 (0.2)	-2.9e-05	0.3 (0.08)	6.14806e-05	0.42 (0.14)	-1.09183e-05	0.28 (0.07)	0.000199867	0.21 (0.06)	0.000242983	0.42 (0.05)	0.000129162	0.38 (0.04)	4.48333e-05	0.41 (0.08)	1.30632e-05
GSTM1	P266	0.000103791	0.37 (0.09)	5.7e-05	0.29 (0.21)	-9.33625e-08	0.24 (0.13)	8.55627e-05	0.49 (0.18)	6e-06	0.33 (0.22)	1.92607e-05	0.36 (0.17)	-4.83571e-06	0.38 (0.15)	1.16667e-05	0.8 (0.13)	0.00066283	0.48 (0.22)	-4.07519e-05	0.48 (0.27)	-8.51667e-05	0.39 (0.16)	0.00015878
GSTM1	P363	2.73495e-05	0.81 (0.07)	2.16667e-05	0.77 (0.14)	2.00712e-06	0.79 (0.11)	5.95238e-05	0.93 (0.01)	0.000123	0.78 (0.12)	7.63209e-07	0.83 (0.09)	-8.41667e-06	0.88 (0.04)	1.96667e-05	0.93 (0.05)	4.13629e-05	0.86 (0.07)	-7.84556e-05	0.86 (0.07)	-4.31667e-05	0.86 (0.06)	9.65971e-05
GSTM2	E153	0.000127433	0.07 (0.01)	0.000359667	0.07 (0.06)	2.46107e-05	0.2 (0.09)	0.000187109	0.08 (0.08)	1.9e-05	0.09 (0.03)	5.39645e-05	0.11 (0.07)	-6.73254e-06	0.12 (0.07)	-0.000144333	0.38 (0.12)	0.000544273	0.18 (0.13)	0.00032069	0.09 (0.04)	-6.6e-05	0.11 (0.04)	0.000100952
GSTM2	P109	8.736e-05	0.06 (0.03)	-3.33333e-06	0.07 (0.04)	-1.90748e-07	0.28 (0.11)	0.000981594	0.12 (0.16)	6e-06	0.08 (0.03)	2.97491e-06	0.08 (0.05)	3.37611e-05	0.09 (0.06)	-0.000105333	0.07 (0.03)	8.9702e-06	0.12 (0.06)	8.34897e-05	0.07 (0.02)	8.08333e-05	0.09 (0.02)	9.47279e-05
GSTM2	P453	0.000162535	0.45 (0.11)	0.000119833	0.69 (0.06)	4.30396e-05	0.55 (0.13)	8.53968e-06	0.66 (0.12)	-2.2e-05	0.74 (0.05)	0.000380942	0.48 (0.12)	4.75214e-05	0.47 (0.09)	4.56667e-05	0.33 (0.12)	0.000226044	0.58 (0.11)	-6.60317e-06	0.53 (0.07)	5.28333e-05	0.54 (0.11)	0.000141083
GSTP1	E322	9.0289e-05	0.09 (0.01)	0.000203667	0.06 (0.03)	1.69113e-07	0.08 (0.04)	3.80675e-05	0.11 (0.11)	-6.1e-05	0.05 (0.02)	6.74635e-06	0.09 (0.06)	-9.04857e-05	0.36 (0.13)	0.00340777	0.05 (0.02)	1.5087e-05	0.1 (0.07)	2.02037e-05	0.07 (0.05)	-4e-05	0.08 (0.03)	3.49484e-05
GSTP1	P74	0.0017471	0.1 (0.01)	0.000328833	0.04 (0.01)	0.00798774	0.07 (0.02)	0.00109474	0.08 (0.02)	0.00011	0.09 (0.02)	0.000114278	0.07 (0.02)	0.000945171	0.13 (0.03)	0.0005247	0.14 (0.04)	0.00100048	0.14 (0.03)	0.00157353	0.09 (0.01)	0.000305333	0.1 (0.02)	0.0011694
GSTP1	S153	0.00101848	0.05 (0.01)	0.000189167	0.02 (0)	0.00385264	0.02 (0.01)	0.00063082	0.04 (0)	0.000183	0.04 (0.01)	0.00077205	0.02 (0)	0.00224001	0.07 (0.02)	0.000714733	0.06 (0.02)	0.000170103	0.06 (0.01)	0.000489727	0.05 (0.01)	0.000150833	0.05 (0.01)	0.000289205
GUCY2D	E419	0.00131311	0.06 (0.03)	0.0001515	0.03 (0.01)	6.74746e-05	0.04 (0.01)	0.000943123	0.04 (0)	9.3e-05	0.04 (0.02)	4.00053e-05	0.06 (0.03)	0.000855991	0.07 (0.04)	0.0003746	0.8 (0.1)	0.0118067	0.06 (0.05)	0.000280164	0.07 (0.06)	0.000170833	0.05 (0.02)	0.000734011
GUCY2D	P48	0.000881996	0.28 (0.06)	8.21667e-05	0.08 (0.03)	0.00142458	0.17 (0.06)	0.000305031	0.13 (0.11)	5e-05	0.22 (0.05)	0.000394262	0.17 (0.08)	0.000341348	0.29 (0.03)	0.0003094	0.56 (0.11)	0.00534534	0.26 (0.06)	0.000144718	0.26 (0.06)	9.25e-05	0.25 (0.06)	0.000241752
H19	P1411	4.65798e-05	0.87 (0.03)	0.000215333	0.8 (0.04)	3.65395e-06	0.81 (0.04)	-1.6854e-05	0.78 (0.02)	3.3e-05	0.77 (0.05)	1.85439e-05	0.84 (0.03)	3.51738e-05	0.82 (0.03)	2.41e-05	0.65 (0.1)	0.000305828	0.84 (0.06)	7.77019e-05	0.84 (0.03)	-4.83333e-06	0.82 (0.04)	-6.29376e-06
H19	P541	3.1004e-05	0.23 (0.05)	-4.36667e-05	0.28 (0.25)	3.52085e-06	0.31 (0.27)	-7.75397e-07	0.14 (0.14)	-1.4e-05	0.24 (0.18)	1.73838e-06	0.35 (0.27)	-7.52143e-06	0.29 (0.22)	1.35667e-05	0.2 (0.09)	6.68001e-06	0.27 (0.11)	1.886e-05	0.25 (0.02)	0.000123833	0.33 (0.18)	0.000112549
HBEGF	P32	0.000464906	0.05 (0.03)	-0.000122833	0.02 (0)	0.000266647	0.03 (0.02)	0.000826779	0.03 (0.01)	0.000158	0.06 (0.03)	7.71722e-07	0.02 (0)	0.00150361	0.06 (0.03)	6.92333e-05	0.11 (0.07)	6.57368e-05	0.09 (0.03)	0.00270551	0.05 (0.01)	0.000258167	0.06 (0.02)	0.000346077
HBII-13	E48	0.000381555	0.88 (0.04)	0.000204333	0.92 (0.02)	4.60516e-05	0.87 (0.02)	0.000543957	0.87 (0.06)	-2.5e-05	0.92 (0.02)	1.96423e-05	0.88 (0.02)	0.000430991	0.88 (0.04)	0.0005438	0.63 (0.14)	0.00244742	0.92 (0.01)	0.000464792	0.93 (0.01)	0.000647167	0.91 (0.03)	0.000105895
HBII-13	P991	0.000251389	0.83 (0.03)	0.0001775	0.93 (0.02)	0.000302102	0.9 (0.07)	0.000143398	0.9 (0.03)	1.7e-05	0.84 (0.03)	0.00018127	0.93 (0.01)	0.00118943	0.8 (0.1)	-3.82333e-05	0.73 (0.07)	0.000197374	0.85 (0.03)	9.01989e-05	0.86 (0.01)	0.000119333	0.86 (0.03)	0.000258929
HBII-52	E142	0.000141685	0.52 (0.1)	7.66667e-06	0.66 (0.16)	2.96346e-06	0.68 (0.08)	0.000172196	0.51 (0.03)	9.8e-05	0.61 (0.13)	3.6006e-06	0.68 (0.06)	0.0003242	0.57 (0.12)	-1.85e-05	0.26 (0.11)	0.00111193	0.54 (0.08)	0.000122507	0.59 (0.09)	1.5e-05	0.55 (0.11)	1.78844e-06
HBII-52	P563	0.0002704	0.87 (0.03)	5.26667e-05	0.9 (0.02)	0.000281096	0.88 (0.03)	6.36397e-05	0.88 (0.05)	-6.5e-05	0.83 (0.03)	0.00024132	0.9 (0.01)	0.00104787	0.83 (0.07)	0.000125567	0.71 (0.09)	0.000473903	0.82 (0.08)	0.00045311	0.87 (0.02)	2.11667e-05	0.86 (0.03)	0.000116687
HBII-52	P659	6.81431e-05	0.92 (0.01)	-7.66667e-06	0.94 (0.01)	0.000149186	0.93 (0.02)	2.50389e-05	0.89 (0.06)	4e-06	0.89 (0.06)	0.000127884	0.92 (0.01)	2.29619e-05	0.91 (0.03)	-7.53333e-06	0.86 (0.04)	6.78086e-05	0.91 (0.03)	-2.23533e-05	0.93 (0.01)	9.03333e-05	0.92 (0.02)	2.35144e-05
HCK	P46	0.000289783	0.11 (0.02)	0.0002655	0.02 (0.01)	0.000402374	0.03 (0.02)	0.000350297	0.1 (0.09)	-2.6e-05	0.09 (0.03)	0.000114377	0.03 (0.01)	0.00159149	0.11 (0.05)	6.17667e-05	0.15 (0.07)	1.50906e-05	0.13 (0.06)	0.000213977	0.1 (0.03)	9.76667e-05	0.09 (0.03)	0.000296906
HCK	P858	0.00162572	0.27 (0.06)	0.00131133	0.16 (0.08)	0.000192896	0.54 (0.13)	0.00219001	0.5 (0.41)	2.3e-05	0.18 (0.07)	0.000217644	0.69 (0.18)	0.00509949	0.67 (0.08)	0.00500363	0.52 (0.14)	0.000882914	0.51 (0.16)	0.00371588	0.43 (0.21)	-4.31667e-05	0.36 (0.12)	0.00248815
HDAC1	P414	0.00112683	0.54 (0.12)	0.000209833	0.24 (0.08)	4.78426e-05	0.63 (0.15)	0.00142743	0.19 (0.28)	0.000117	0.3 (0.06)	0.000152434	0.35 (0.12)	0.000105625	0.37 (0.13)	0.000145667	0.47 (0.14)	-7.28763e-06	0.58 (0.11)	0.00482745	0.45 (0.23)	0.00064	0.44 (0.08)	0.00243672
HDAC11	P556	4.03304e-05	0.05 (0.02)	2.33333e-05	0.02 (0)	0.000132226	0.03 (0.01)	0.000111552	0.04 (0)	4.5e-05	0.03 (0.01)	5.34722e-06	0.03 (0)	3.54786e-05	0.04 (0.01)	0.000183133	0.05 (0.03)	1.35833e-05	0.04 (0.01)	2.41631e-05	0.03 (0.01)	-9.16667e-06	0.04 (0.01)	1.25782e-05
HDAC5	E298	0.000274895	0.37 (0.05)	0.000152333	0.22 (0.04)	0.000178237	0.2 (0.08)	0.00064723	0.34 (0.13)	4.1e-05	0.32 (0.05)	1.97726e-05	0.23 (0.03)	0.00151325	0.35 (0.08)	-0.0001259	0.4 (0.1)	2.3435e-05	0.41 (0.08)	0.000255299	0.37 (0.04)	0.000149167	0.38 (0.06)	0.000430621
HDAC7A	P344	0.000297507	0.91 (0.02)	2.55e-05	0.95 (0.01)	2.97456e-05	0.67 (0.2)	0.00498295	0.92 (0.03)	-1.7e-05	0.93 (0.02)	9.94059e-06	0.92 (0.02)	0.000214656	0.92 (0.03)	-0.000116733	0.93 (0.04)	-2.70491e-06	0.94 (0.01)	8.92749e-05	0.93 (0.01)	8.11667e-05	0.94 (0.01)	9.82212e-05
HDAC9	E38	0.000352629	0.09 (0.04)	5.18333e-05	0.11 (0.04)	2.10233e-05	0.13 (0.05)	0.0001304	0.11 (0.07)	-1e-05	0.08 (0.03)	7.07314e-05	0.11 (0.04)	0.000173679	0.09 (0.04)	0.000121733	0.62 (0.15)	0.00226339	0.2 (0.16)	-0.000136428	0.19 (0.11)	5.7e-05	0.17 (0.06)	0.000486463
HDAC9	P137	0.000299362	0.15 (0.07)	9.06667e-05	0.22 (0.05)	1.97763e-05	0.14 (0.06)	0.000230011	0.06 (0.03)	0.000372	0.19 (0.05)	3.09103e-05	0.19 (0.03)	0.000187512	0.1 (0.05)	0.000598633	0.67 (0.14)	0.00191617	0.27 (0.15)	-9.13037e-05	0.23 (0.13)	-5.33333e-06	0.24 (0.06)	0.000292736
HFE	E273	7.70658e-05	0.04 (0.02)	-7.65e-05	0.03 (0.01)	1.67023e-05	0.09 (0.04)	0.00110466	0.02 (0)	6.3e-05	0.03 (0.01)	4.94606e-06	0.03 (0.01)	0.000153695	0.04 (0.02)	-9.65333e-05	0.29 (0.32)	3.21791e-05	0.04 (0.02)	-3.91099e-05	0.03 (0)	5.76667e-05	0.03 (0.01)	2.43454e-05
HGF	E102	0.000266085	0.11 (0.06)	0.0007755	0.32 (0.13)	1.78391e-05	0.09 (0.05)	0.0013254	0.2 (0.18)	-0.000126	0.41 (0.11)	8.66205e-05	0.14 (0.15)	0.000876552	0.13 (0.05)	0.000681367	0.32 (0.16)	-4.59646e-06	0.29 (0.15)	6.73438e-05	0.28 (0.2)	-2.8e-05	0.3 (0.08)	0.000345042
HGF	P1293	0.00120899	0.94 (0.01)	0.0004315	0.96 (0.01)	7.8993e-05	0.96 (0.01)	0.000669392	0.96 (0.01)	3.9e-05	0.95 (0.01)	1.7588e-05	0.95 (0.01)	0.000642154	0.95 (0.01)	0.000387733	0.77 (0.11)	0.0111261	0.96 (0.01)	0.000537212	0.96 (0.01)	0.000258667	0.95 (0.01)	0.000550411
HHIP	E94	5.61388e-05	0.14 (0.05)	-7.5e-06	0.05 (0.02)	0.000104351	0.05 (0.03)	0.000158729	0.35 (0.21)	4.4e-05	0.12 (0.04)	1.24295e-05	0.09 (0.07)	4.18333e-06	0.13 (0.02)	2.44667e-05	0.14 (0.07)	5.27778e-07	0.17 (0.05)	0.000190664	0.12 (0.03)	-1.13333e-05	0.14 (0.03)	5.09919e-05
HHIP	P307	0.000265693	0.1 (0.02)	0.000153167	0.08 (0.04)	7.57218e-06	0.05 (0.03)	0.000590944	0.05 (0.01)	0.000384	0.1 (0.02)	1.89572e-05	0.06 (0.02)	0.000770739	0.1 (0.01)	0.000446633	0.13 (0.04)	1.95567e-06	0.15 (0.03)	0.000701562	0.16 (0.07)	2.5e-06	0.13 (0.03)	0.000440783
HHIP	P578	7.71533e-05	0.13 (0.04)	-8e-06	0.28 (0.1)	2.85374e-05	0.08 (0.08)	0.000281684	0.06 (0.06)	0.000136	0.18 (0.08)	3.76903e-06	0.09 (0.07)	0.000162819	0.1 (0.04)	0.000316733	0.42 (0.15)	0.000223234	0.19 (0.07)	9.38286e-05	0.18 (0.05)	-4.38333e-05	0.16 (0.06)	2.6608e-05
HIC1	E151	4.52659e-05	0.08 (0.04)	5.88333e-05	0.03 (0.01)	5.34721e-05	0.06 (0.02)	1.26643e-05	0.04 (0)	0.0001	0.04 (0.02)	8.26523e-06	0.07 (0.02)	5.22198e-05	0.06 (0.02)	-6.81667e-05	0.07 (0.03)	3.98505e-06	0.08 (0.03)	6.43196e-07	0.05 (0.02)	-7.51667e-05	0.07 (0.02)	0.00012958
HIC1	P565	0.000165053	0.05 (0)	0.000303333	0.03 (0.01)	0.000103903	0.03 (0.02)	0.000158333	0.05 (0.01)	-3.4e-05	0.05 (0.01)	8.48088e-06	0.04 (0.01)	0.000249917	0.07 (0.02)	0.0005689	0.06 (0.03)	5.29875e-06	0.08 (0.06)	5.60753e-05	0.08 (0.06)	1.56667e-05	0.07 (0.05)	0.000392017
HIC-1	S103	0.00767509	0.7 (0.06)	0.001403	0.39 (0.14)	0.00314118	0.75 (0.07)	0.00450434	0.57 (0.06)	0.000777	0.1 (0.05)	0.0165494	0.8 (0.1)	0.00442064	0.56 (0.18)	0.0020141	0.94 (0.05)	0.0092487	0.84 (0.06)	0.00332688	0.47 (0.18)	0.00125133	0.81 (0.08)	0.00587203
HIC2	P498	0.0014882	0.05 (0.02)	0.000161833	0.05 (0.01)	0.00206682	0.05 (0.01)	0.00105036	0.07 (0.06)	0.000104	0.02 (0.02)	0.00271984	0.1 (0.03)	0.0019253	0.05 (0.01)	0.000547567	0.04 (0.03)	-9.05515e-05	0.08 (0.07)	0.000835888	0.04 (0.01)	-0.000282833	0.05 (0.01)	0.00118837
HIC2	P528	2.92752e-05	0.04 (0.01)	-1.96667e-05	0.03 (0)	6.93229e-05	0.04 (0.01)	3.54683e-06	0.08 (0.04)	1.3e-05	0.03 (0.01)	1.27316e-05	0.04 (0.01)	1.78135e-05	0.05 (0.01)	0.000111167	0.05 (0.01)	5.05433e-06	0.05 (0.02)	0.00016284	0.04 (0.01)	-1.81667e-05	0.04 (0.01)	-9.4075e-06
HIF1A	P488	0.00013881	0.06 (0.02)	-1.7e-05	0.03 (0.01)	8.64162e-05	0.06 (0.04)	-4.07619e-06	0.22 (0.15)	6.4e-05	0.09 (0.04)	9.93707e-06	0.05 (0.02)	2.41254e-05	0.07 (0.03)	-3.93333e-05	0.1 (0.05)	9.4096e-06	0.08 (0.03)	-9.11898e-05	0.07 (0.02)	-5.08333e-05	0.07 (0.02)	0.000556416
HLA-DOA	P191	0.000266828	0.72 (0.08)	4.63333e-05	0.31 (0.07)	0.000439068	0.33 (0.19)	0.000508048	0.56 (0.4)	-0.000117	0.59 (0.13)	3.40625e-05	0.46 (0.13)	0.000243937	0.73 (0.08)	4.37333e-05	0.45 (0.16)	0.0004645	0.73 (0.06)	0.000213612	0.78 (0.03)	0.000460333	0.7 (0.09)	0.000339411
HLA-DOA	P594	6.0255e-06	0.74 (0.05)	-3.23333e-05	0.82 (0.04)	1.50653e-05	0.76 (0.05)	-4.56429e-06	0.7 (0.12)	2.5e-05	0.78 (0.04)	4.16026e-06	0.77 (0.04)	1.21111e-06	0.72 (0.06)	5.68333e-05	0.73 (0.11)	1.74697e-06	0.78 (0.03)	4.95e-06	0.78 (0.02)	2.46667e-05	0.77 (0.05)	3.35081e-06
HLA-DOB	E432	0.000455931	0.86 (0.04)	8.43333e-05	0.81 (0.02)	0.000392071	0.84 (0.05)	0.000122987	0.58 (0.16)	0.000562	0.87 (0.03)	0.000225121	0.58 (0.11)	0.00486127	0.88 (0.03)	0.000253633	0.74 (0.08)	0.0003705	0.89 (0.03)	0.000165934	0.89 (0.03)	0.000151667	0.88 (0.03)	0.000225629
HLA-DOB	P1114	0.000135356	0.93 (0.01)	0.000380667	0.94 (0.01)	1.02825e-05	0.94 (0.01)	0.0001031	0.95 (0)	0.000114	0.93 (0.02)	3.2616e-06	0.93 (0.01)	6.57032e-05	0.93 (0.01)	7.09e-05	0.84 (0.09)	0.000884298	0.95 (0.01)	0.000167947	0.95 (0)	0.000204333	0.95 (0.01)	4.84258e-05
HLA-DOB	P357	8.43643e-05	0.92 (0.02)	3.56667e-05	0.95 (0.01)	3.61026e-05	0.96 (0.01)	0.000585736	0.93 (0.02)	3.4e-05	0.93 (0.02)	3.94346e-06	0.91 (0.02)	0.000911144	0.93 (0.02)	7.23333e-06	0.93 (0.03)	-7.88983e-07	0.95 (0.01)	-1.26304e-05	0.95 (0.02)	-5.55e-05	0.95 (0.02)	3.31725e-05
HLA-DPA1	E35	0.00461409	0.92 (0.02)	0.00533983	0.54 (0.11)	0.00177819	0.96 (0.01)	0.0173399	0.92 (0.03)	0.002092	0.72 (0.09)	0.000559377	0.89 (0.05)	0.00381493	0.92 (0.02)	0.0091175	0.91 (0.02)	0.00808192	0.87 (0.02)	0.00451526	0.92 (0.02)	0.0058925	0.82 (0.05)	0.00604501
HLA-DPA1	P205	0.00337157	0.6 (0.08)	0.00373217	0.09 (0.04)	0.00746567	0.79 (0.08)	0.00849811	0.56 (0.18)	0.00061	0.33 (0.09)	0.000118196	0.54 (0.18)	0.00125063	0.65 (0.04)	0.00682267	0.42 (0.13)	0.000955703	0.45 (0.09)	0.0027643	0.4 (0.1)	0.0006495	0.31 (0.08)	0.00501156
			Bladder (n=5)		Blood (n=30)		Brain (n=12)		Cervix (n=3)		Infant blood (n=55)		Head and neck (n=11)		Kidney (n=6)		Placenta (n=19)		Pleura (n=18)		Small intestine (n=5)		Lung (n=53)
GENE	CpG	Mean decrease in accuracy	Mean (sd)	Decrease in accuracy	Mean (sd)	Decrease in accuracy	Mean (sd)	Decrease in accuracy	Mean (sd)	Decrease in accuracy	Mean (sd)	Decrease in accuracy	Mean (sd)	Decrease in accuracy	Mean (sd)	Decrease in accuracy	Mean (sd)	Decrease in accuracy	Mean (sd)	Decrease in accuracy	Mean (sd)	Decrease in accuracy	Mean (sd)	Decrease in accuracy
HLA-DPA1	P28	0.00387546	0.5 (0.07)	0.00562567	0.09 (0.05)	0.000609882	0.82 (0.09)	0.0156442	0.51 (0.04)	0.002213	0.2 (0.06)	0.000182573	0.49 (0.21)	0.00406275	0.52 (0.04)	0.0098569	0.46 (0.1)	0.0076974	0.31 (0.1)	0.000445686	0.39 (0.07)	0.00440617	0.21 (0.07)	0.0058651
HLA-DPB1	E2	0.000472663	0.64 (0.08)	0.00177883	0.14 (0.03)	0.000911277	0.81 (0.13)	0.00256419	0.18 (0.11)	0.000179	0.31 (0.07)	2.17605e-05	0.58 (0.19)	0.000308477	0.34 (0.06)	0.000252267	0.31 (0.09)	8.71125e-05	0.41 (0.12)	9.12406e-05	0.45 (0.1)	-8.36667e-05	0.33 (0.07)	0.000501857
HLA-DPB1	P540	0.000273552	0.95 (0.01)	4.38333e-05	0.97 (0)	9.11449e-05	0.97 (0.01)	0.00113999	0.96 (0.02)	-4.6e-05	0.95 (0.01)	6.30685e-05	0.95 (0.01)	0.000217352	0.96 (0.01)	0.0001701	0.8 (0.13)	0.00152168	0.95 (0.02)	4.03699e-05	0.94 (0.04)	-0.000103667	0.95 (0.01)	0.000117579
HLA-DQA2	E93	0.000181057	0.62 (0.06)	0.000299667	0.82 (0.04)	0.000214802	0.76 (0.07)	0.000122064	0.58 (0.1)	3.5e-05	0.68 (0.05)	6.08033e-05	0.77 (0.04)	0.000420551	0.7 (0.05)	1.06333e-05	0.47 (0.09)	0.000968769	0.68 (0.08)	6.19556e-05	0.67 (0.04)	3.43333e-05	0.7 (0.05)	4.2665e-05
HLA-DQA2	P282	8.87079e-05	0.81 (0.04)	6.48333e-05	0.85 (0.14)	0.000150539	0.83 (0.09)	7.53095e-06	0.71 (0.16)	-6.4e-05	0.63 (0.09)	0.000166863	0.85 (0.02)	0.000182562	0.75 (0.1)	2.26667e-06	0.71 (0.11)	5.05198e-06	0.75 (0.06)	1.42929e-07	0.78 (0.05)	-2.05e-05	0.77 (0.06)	5.60132e-05
HLA-DRA	P132	0.0001939	0.23 (0.11)	0.000749667	0.1 (0.05)	5.73563e-06	0.16 (0.1)	-2.22206e-05	0.09 (0.09)	3.6e-05	0.19 (0.07)	1.05734e-05	0.1 (0.06)	3.58889e-06	0.12 (0.05)	3.64333e-05	0.24 (0.13)	0.000126078	0.09 (0.03)	3.85174e-05	0.09 (0.05)	-8.33333e-07	0.07 (0.02)	0.000655639
HLA-DRA	P77	0.00057696	0.43 (0.08)	0.00240367	0.06 (0.01)	0.000315241	0.26 (0.1)	0.000249323	0.09 (0.08)	0.000164	0.07 (0.03)	0.000130149	0.22 (0.09)	8.45897e-05	0.46 (0.08)	0.00303617	0.57 (0.15)	0.00162261	0.2 (0.09)	-2.75049e-05	0.15 (0.06)	0.0004025	0.15 (0.05)	0.000819695
HLA-F	E402	0.000100089	0.02 (0.01)	-2.18333e-05	0.01 (0)	0.000231361	0.02 (0)	2.40802e-05	0.03 (0)	2.4e-05	0.02 (0.01)	1.09399e-05	0.02 (0)	5.2873e-05	0.02 (0)	4.10667e-05	0.26 (0.21)	0.00033991	0.02 (0.01)	6.27051e-05	0.02 (0)	-4.55e-05	0.02 (0.01)	8.65745e-05
HLF	E192	3.441e-05	0.04 (0.01)	-7.58333e-05	0.03 (0.01)	1.17394e-05	0.03 (0.01)	6.77198e-05	0.04 (0)	3.6e-05	0.03 (0.01)	6.28804e-07	0.04 (0.02)	5.30079e-06	0.04 (0)	5.29e-05	0.12 (0.1)	9.05298e-05	0.05 (0.02)	6.87757e-06	0.03 (0)	1.5e-05	0.05 (0.01)	7.88577e-05
HOXA11	E35	0.000275374	0.09 (0.02)	0.000492667	0.07 (0.04)	7.5269e-05	0.09 (0.06)	0.000204046	0.06 (0.03)	0.000146	0.07 (0.02)	0.000146281	0.14 (0.05)	4.09206e-06	0.13 (0.02)	0.000361733	0.25 (0.15)	4.7854e-05	0.22 (0.07)	0.0018902	0.16 (0.08)	-0.0001725	0.16 (0.06)	0.00019972
HOXA11	P698	0.000206025	0.29 (0.07)	6.35e-05	0.07 (0.03)	0.000145162	0.23 (0.19)	3.07937e-05	0.14 (0.18)	1.8e-05	0.06 (0.04)	0.000205667	0.28 (0.14)	4.62262e-05	0.63 (0.11)	0.00142727	0.69 (0.21)	0.000325219	0.32 (0.23)	4.01056e-05	0.46 (0.24)	-5.26667e-05	0.23 (0.11)	0.000252598
HOXA11	P92	0.000163223	0.08 (0.03)	-3.68333e-05	0.03 (0.01)	0.000482166	0.13 (0.04)	0.000138332	0.05 (0.03)	8.3e-05	0.1 (0.03)	3.40867e-05	0.1 (0.04)	5.66905e-05	0.07 (0.02)	6.54e-05	0.32 (0.13)	0.000435509	0.12 (0.04)	2.97773e-05	0.09 (0.02)	-6.5e-06	0.09 (0.03)	0.000114542
HOXA5	E187	0.000588106	0.9 (0.02)	0.00105333	0.92 (0.08)	6.66674e-05	0.37 (0.24)	0.0016773	0.62 (0.29)	-7.1e-05	0.93 (0.03)	0.00036119	0.59 (0.2)	0.000430763	0.56 (0.16)	0.00123483	0.32 (0.18)	0.00177365	0.76 (0.06)	0.0005615	0.78 (0.1)	0.000328333	0.8 (0.08)	0.00043929
HOXA5	P1324	0.000312475	0.43 (0.09)	0.0010005	0.49 (0.16)	0.000137505	0.07 (0.08)	0.0019678	0.32 (0.31)	-0.000148	0.15 (0.05)	9.5789e-05	0.21 (0.14)	-7.60714e-05	0.26 (0.1)	6.06333e-05	0.12 (0.07)	1.86092e-05	0.24 (0.17)	1.94914e-05	0.24 (0.09)	-3.63333e-05	0.17 (0.06)	0.000606227
HOXA5	P479	0.000299227	0.89 (0.03)	0.000220833	0.9 (0.03)	9.23095e-05	0.59 (0.12)	0.000386183	0.8 (0.11)	-2.7e-05	0.91 (0.02)	0.000427649	0.63 (0.15)	0.000278904	0.75 (0.13)	0.0001382	0.43 (0.16)	0.000485418	0.76 (0.07)	0.000171342	0.78 (0.16)	-3.96667e-05	0.77 (0.07)	0.000314343
HOXA9	E252	0.000442616	0.07 (0.04)	0.0001955	0.1 (0.01)	0.000228151	0.16 (0.15)	0.000294396	0.04 (0.01)	0.000359	0.05 (0.02)	0.000729188	0.26 (0.11)	0.000655207	0.14 (0.11)	-1.19667e-05	0.68 (0.18)	0.00096131	0.27 (0.23)	0.00034315	0.16 (0.12)	-0.000117167	0.17 (0.11)	0.000241608
HOXA9	P1141	0.000446246	0.43 (0.03)	0.00100133	0.06 (0.02)	0.000360067	0.15 (0.16)	5.79643e-05	0.24 (0.06)	0.000134	0.07 (0.02)	0.000739512	0.21 (0.1)	0.000141294	0.24 (0.09)	0.000221733	0.63 (0.19)	0.000685519	0.37 (0.24)	0.000260016	0.35 (0.21)	-0.000110167	0.21 (0.11)	0.000380449
HOXA9	P303	0.00143269	0.03 (0.01)	0.00169183	0.02 (0.01)	0.00157881	0.29 (0.2)	0.00120015	0.13 (0.02)	0.000324	0.02 (0.01)	0.00179147	0.18 (0.11)	0.00109653	0.04 (0.02)	0.000590233	0.51 (0.19)	0.00134721	0.21 (0.11)	0.000633955	0.15 (0.1)	-5.38333e-05	0.16 (0.05)	0.00171576
HOXB13	E21	0.00321531	0.29 (0.07)	0.000626	0.04 (0.03)	0.00411454	0.12 (0.15)	0.0015851	0.03 (0)	0.000593	0.62 (0.12)	0.00403901	0.12 (0.06)	0.00193708	0.29 (0.14)	0.000594733	0.32 (0.09)	0.00193089	0.46 (0.12)	0.00201426	0.25 (0.06)	0.000730167	0.3 (0.09)	0.00436385
HOXB13	P17	0.000339161	0.18 (0.1)	-0.000118167	0.03 (0.01)	0.0004368	0.05 (0.07)	0.000275913	0.17 (0.13)	-8.1e-05	0.09 (0.03)	0.000344721	0.08 (0.04)	0.00041997	0.21 (0.08)	0.000116533	0.17 (0.06)	3.71638e-05	0.23 (0.07)	0.000226803	0.22 (0.06)	-3.93333e-05	0.21 (0.05)	0.000547662
HOXB2	P488	0.000154053	0.81 (0.07)	1.3e-05	0.83 (0.04)	3.71107e-05	0.56 (0.17)	0.000338647	0.84 (0.06)	1.4e-05	0.89 (0.03)	0.000210931	0.83 (0.08)	-1.78476e-05	0.67 (0.1)	0.000517467	0.92 (0.06)	0.000217986	0.76 (0.08)	2.69785e-05	0.82 (0.07)	4.58333e-05	0.75 (0.07)	0.000156199
HOXB2	P99	0.00025459	0.61 (0.14)	5.76667e-05	0.55 (0.08)	1.8853e-05	0.53 (0.1)	0.000126479	0.53 (0.29)	-0.000139	0.65 (0.06)	9.20114e-05	0.67 (0.16)	-3.30595e-05	0.49 (0.12)	0.0001216	0.81 (0.04)	0.00159026	0.54 (0.08)	0.000141098	0.57 (0.17)	-6.78333e-05	0.52 (0.08)	0.000306239
HOXC6	P456	0.00123842	0.12 (0.04)	1.21667e-05	0.19 (0.05)	0.000943653	0.15 (0.03)	0.000610913	0.3 (0.23)	-0.000208	0.08 (0.02)	0.00136461	0.25 (0.05)	0.00252118	0.14 (0.03)	0.000387233	0.68 (0.12)	0.00533292	0.16 (0.11)	-5.72774e-05	0.11 (0.01)	0.00028	0.13 (0.03)	0.000622132
HOXC6	P585	0.000966702	0.11 (0.03)	0.000414667	0.24 (0.08)	2.30348e-05	0.18 (0.06)	0.000243864	0.07 (0.07)	0.000232	0.13 (0.03)	0.000115983	0.22 (0.02)	0.00184252	0.13 (0.03)	0.000588967	0.54 (0.11)	0.0077474	0.16 (0.05)	0.00018697	0.14 (0.05)	0.000191	0.15 (0.04)	0.000494832
HPN	P374	0.00263483	0.32 (0.07)	0.000723333	0.15 (0.07)	0.00011948	0.55 (0.14)	0.00199457	0.2 (0.13)	-0.000384	0.07 (0.03)	0.00581462	0.34 (0.13)	0.00142793	0.5 (0.08)	0.00136963	0.74 (0.12)	0.00302787	0.53 (0.09)	0.00159193	0.31 (0.1)	0.000636833	0.46 (0.1)	0.00228598
HPN	P823	0.00498957	0.73 (0.07)	0.00119683	0.59 (0.14)	0.000281411	0.88 (0.09)	0.00361808	0.6 (0.23)	-0.000716	0.3 (0.09)	0.0124091	0.81 (0.13)	0.00155126	0.85 (0.04)	0.0019777	0.81 (0.09)	0.00449571	0.88 (0.03)	0.00253582	0.81 (0.08)	0.000786167	0.84 (0.06)	0.00383839
HPSE	P29	0.000826856	0.15 (0.03)	0.000690833	0.02 (0.01)	0.00124431	0.03 (0.03)	0.00132367	0.13 (0.1)	1.2e-05	0.09 (0.03)	0.000339271	0.03 (0.01)	0.00401723	0.12 (0.03)	0.00039	0.14 (0.07)	0.000149345	0.16 (0.03)	0.00156909	0.1 (0.02)	0.000187	0.11 (0.03)	0.000525371
HPSE	P93	0.00209022	0.09 (0.01)	0.00141517	0.03 (0.01)	0.00340394	0.04 (0.03)	0.00165804	0.04 (0.03)	0.000532	0.16 (0.04)	0.00152617	0.03 (0.01)	0.00247061	0.13 (0.07)	-0.00100047	0.25 (0.08)	0.000397448	0.23 (0.05)	0.00844216	0.11 (0.02)	0.00112117	0.13 (0.05)	0.00121501
HRASLS	E72	8.49061e-05	0.05 (0.01)	5.5e-05	0.02 (0.01)	4.88803e-05	0.02 (0.01)	0.000516883	0.1 (0.12)	-6.2e-05	0.05 (0.02)	-8.89912e-07	0.03 (0.01)	0.00016756	0.07 (0.04)	6.17667e-05	0.07 (0.05)	1.00983e-05	0.07 (0.02)	0.000161799	0.05 (0.02)	-6.66667e-07	0.06 (0.02)	9.37035e-05
HRASLS	P353	2.33601e-05	0.57 (0.06)	-2.23333e-05	0.59 (0.14)	4.56767e-06	0.54 (0.08)	-9.9127e-07	0.34 (0.29)	3.7e-05	0.6 (0.08)	1.49284e-05	0.5 (0.14)	1.33413e-06	0.57 (0.13)	-2.61667e-05	0.48 (0.08)	1.40463e-05	0.52 (0.04)	0.000170221	0.58 (0.06)	6.16667e-06	0.54 (0.08)	2.27737e-05
HS3ST2	E145	0.000357207	0.08 (0.06)	-1.86667e-05	0.16 (0.07)	9.07657e-05	0.06 (0.04)	0.000483903	0.14 (0.16)	-1.4e-05	0.06 (0.02)	0.000467762	0.21 (0.11)	9.25095e-05	0.12 (0.07)	-9.05e-05	0.5 (0.24)	0.00025213	0.21 (0.17)	-0.000190996	0.33 (0.31)	2.98333e-05	0.18 (0.07)	0.000776833
HS3ST2	P171	0.000214752	0.18 (0.02)	0.0001955	0.06 (0.02)	0.000148082	0.04 (0.03)	0.00116942	0.13 (0.1)	-4e-06	0.12 (0.03)	6.83128e-05	0.08 (0.04)	0.000128537	0.14 (0.01)	0.000195533	0.3 (0.15)	6.61657e-05	0.19 (0.08)	0.000136398	0.21 (0.13)	-4.75e-05	0.16 (0.04)	0.000321
HS3ST2	P546	0.000720653	0.23 (0.05)	-3.83333e-06	0.09 (0.02)	0.000676705	0.07 (0.06)	0.0016015	0.27 (0.12)	-0.000196	0.17 (0.04)	0.000169803	0.11 (0.05)	0.000981867	0.26 (0.05)	0.000401733	0.39 (0.1)	0.000335983	0.31 (0.08)	0.000814912	0.29 (0.12)	4.53333e-05	0.29 (0.05)	0.00137111
HSD17B12	E145	0.00115317	0.05 (0.01)	0.000257833	0.02 (0)	0.00357632	0.02 (0.01)	0.000704261	0.05 (0.01)	0.000171	0.04 (0.01)	0.000977334	0.02 (0)	0.00315135	0.05 (0.01)	0.000614067	0.07 (0.01)	0.000344094	0.06 (0.05)	0.000288137	0.05 (0.01)	0.0002805	0.05 (0.01)	0.000565614
HSD17B12	P97	3.36159e-05	0.07 (0.03)	9e-05	0.04 (0.01)	0.000117764	0.05 (0.01)	5.92484e-05	0.06 (0.01)	-1.8e-05	0.05 (0.01)	8.3376e-06	0.06 (0.01)	0.00021421	0.07 (0.01)	7.21333e-05	0.06 (0.01)	1.73954e-07	0.07 (0.07)	-3.13835e-05	0.06 (0.02)	-4.83333e-05	0.05 (0.01)	8.01216e-07
HSPA2	P162	0.000379726	0.91 (0.02)	6.11667e-05	0.96 (0.01)	0.00197775	0.9 (0.03)	0.000133646	0.87 (0.06)	-1.1e-05	0.9 (0.02)	4.095e-05	0.86 (0.04)	0.000342447	0.88 (0.04)	8.27667e-05	0.87 (0.04)	0.000221115	0.89 (0.02)	0.000165533	0.9 (0.03)	2.18333e-05	0.9 (0.02)	0.000151746
HTR1B	E232	0.000251323	0.21 (0.01)	0.000219833	0.13 (0.05)	1.75688e-05	0.09 (0.08)	0.00101092	0.17 (0.12)	-6.1e-05	0.13 (0.04)	6.95933e-05	0.27 (0.12)	0.000235877	0.18 (0.06)	8.16e-05	0.71 (0.14)	0.00134502	0.26 (0.14)	3.60497e-05	0.34 (0.24)	6.53333e-05	0.21 (0.06)	0.000140937
HTR1B	P107	0.000758437	0.48 (0.02)	0.000455667	0.11 (0.08)	0.00136022	0.14 (0.14)	0.000917067	0.43 (0.05)	6.4e-05	0.39 (0.05)	0.000487708	0.16 (0.06)	0.00346173	0.43 (0.06)	0.000322967	0.6 (0.13)	0.000253507	0.44 (0.05)	0.00016885	0.46 (0.03)	0.000205333	0.45 (0.04)	0.000657916
HTR1B	P222	8.80522e-05	0.08 (0.04)	-2.33333e-06	0.06 (0.04)	2.86611e-06	0.06 (0.09)	5.03706e-05	0.05 (0.02)	2e-05	0.02 (0.01)	0.000151875	0.15 (0.15)	8.56984e-06	0.1 (0.1)	-5.23333e-06	0.52 (0.23)	0.000269838	0.09 (0.07)	-3.3343e-05	0.17 (0.2)	-2.35e-05	0.1 (0.05)	9.20084e-05
HTR2A	E10	0.000380707	0.84 (0.04)	0.00027	0.95 (0.01)	0.000940439	0.77 (0.09)	0.000678229	0.85 (0.04)	8.7e-05	0.91 (0.02)	0.000105766	0.91 (0.02)	0.000221572	0.85 (0.05)	0.000232733	0.77 (0.05)	0.000818322	0.88 (0.03)	8.67792e-05	0.88 (0.01)	0.000272333	0.9 (0.02)	0.000264806
HTR2A	P853	0.000264279	0.09 (0.05)	-0.000128667	0.08 (0.04)	-1.65389e-06	0.04 (0.02)	0.00086166	0.03 (0)	0.000284	0.1 (0.06)	-1.77939e-06	0.08 (0.05)	8.12476e-05	0.07 (0.04)	0.000334567	0.13 (0.09)	-6.43256e-06	0.12 (0.05)	4.06808e-05	0.2 (0.14)	4.7e-05	0.15 (0.05)	0.000799365
IAPP	E280	0.000745496	0.93 (0.01)	0.000148167	0.95 (0.01)	8.32128e-05	0.96 (0.01)	0.00192113	0.93 (0.02)	3.5e-05	0.93 (0.02)	5.11896e-05	0.93 (0.01)	0.000467326	0.94 (0.01)	0.000238633	0.78 (0.05)	0.00571455	0.93 (0.03)	0.000126883	0.92 (0.04)	-8.33333e-07	0.94 (0.01)	0.000317573
ICA1	P61	8.311e-05	0.07 (0.03)	8.95e-05	0.03 (0.01)	2.18082e-05	0.04 (0.01)	-2.44286e-06	0.04 (0.01)	-2.2e-05	0.03 (0.01)	7.54956e-06	0.06 (0.03)	4.19254e-05	0.05 (0.01)	1.8e-06	0.04 (0.01)	-4.29675e-06	0.06 (0.05)	-0.000152895	0.05 (0.02)	-2.5e-05	0.05 (0.01)	0.000366755
ICA1	P72	2.52369e-05	0.09 (0.05)	-3.05e-05	0.07 (0.01)	1.62845e-05	0.1 (0.03)	1.55183e-05	0.06 (0.05)	4.6e-05	0.05 (0.02)	4.68232e-05	0.11 (0.06)	3.27206e-05	0.1 (0.04)	1.46e-05	0.08 (0.04)	-3.18408e-06	0.1 (0.02)	0.000112889	0.1 (0.02)	1.33333e-06	0.08 (0.03)	-1.2622e-06
ICAM1	E242	6.67665e-05	0.1 (0.05)	-4.61667e-05	0.04 (0.01)	0.000100926	0.15 (0.07)	3.9973e-05	0.05 (0.01)	7.8e-05	0.08 (0.04)	1.97278e-06	0.09 (0.03)	2.88095e-06	0.12 (0.03)	3.62333e-05	0.15 (0.1)	4.52564e-06	0.13 (0.06)	1.78146e-05	0.11 (0.03)	-3.7e-05	0.09 (0.02)	0.000202009
ICAM1	P119	0.000241752	0.12 (0.05)	7.88333e-05	0.02 (0)	0.000921907	0.04 (0.02)	0.000113229	0.04 (0.01)	0.000114	0.1 (0.04)	3.52502e-05	0.04 (0.02)	0.000389249	0.1 (0.04)	8.34e-05	0.12 (0.07)	8.37575e-05	0.11 (0.03)	0.000148555	0.09 (0.03)	3.15e-05	0.09 (0.04)	0.000214181
ICAM1	P386	0.00285046	0.32 (0.17)	0.00262817	0.02 (0.01)	0.000342345	0.35 (0.15)	0.00891504	0.08 (0.09)	-0.000716	0.05 (0.03)	0.000133519	0.35 (0.12)	0.0114574	0.16 (0.07)	0.00282567	0.25 (0.12)	0.00432155	0.12 (0.09)	0.000309999	0.3 (0.2)	0.00435083	0.08 (0.03)	0.00433535
ID1	P659	1.76446e-05	0.06 (0.04)	-1.01667e-05	0.08 (0.02)	2.26051e-05	0.07 (0.01)	2.5827e-05	0.03 (0.01)	0.000139	0.06 (0.02)	1.9535e-06	0.08 (0.03)	2.4731e-05	0.09 (0.04)	3.71667e-05	0.12 (0.06)	1.25594e-05	0.08 (0.03)	-2.5977e-05	0.06 (0.01)	4.23333e-05	0.07 (0.02)	3.4294e-05
ID1	P880	0.000312513	0.26 (0.07)	6.15e-05	0.08 (0.02)	0.000592015	0.16 (0.04)	8.43762e-05	0.15 (0.12)	-8e-05	0.18 (0.04)	0.000135849	0.1 (0.03)	0.00100819	0.28 (0.07)	0.000261667	0.27 (0.12)	2.59264e-05	0.24 (0.07)	-0.000144098	0.27 (0.03)	0.000197167	0.26 (0.05)	0.000567419
IFNG	E293	0.000396907	0.76 (0.05)	9.26667e-05	0.8 (0.05)	5.91094e-06	0.86 (0.04)	0.000540923	0.74 (0.1)	-4.3e-05	0.86 (0.03)	0.000411183	0.82 (0.03)	0.000257774	0.76 (0.04)	9.86667e-05	0.48 (0.1)	0.000757275	0.7 (0.15)	-6.36352e-05	0.74 (0.13)	3.6e-05	0.71 (0.08)	0.000748959
IFNG	P188	0.000191566	0.9 (0.02)	-2.66667e-05	0.92 (0.01)	4.09423e-05	0.93 (0.02)	0.000380894	0.91 (0.04)	-1.8e-05	0.9 (0.02)	3.41805e-05	0.87 (0.03)	0.000243573	0.91 (0.02)	6.50333e-05	0.74 (0.06)	0.000820348	0.88 (0.05)	-1.54196e-05	0.88 (0.07)	6.03333e-05	0.88 (0.03)	0.000284099
IFNG	P459	6.91014e-05	0.89 (0.03)	-6.16667e-06	0.88 (0.03)	4.67557e-06	0.91 (0.02)	0.000154283	0.8 (0.12)	-3.7e-05	0.91 (0.02)	6.26501e-05	0.85 (0.04)	-1.05071e-05	0.88 (0.02)	4.79667e-05	0.75 (0.07)	0.000223502	0.83 (0.07)	0.000132695	0.87 (0.04)	2.75e-05	0.85 (0.04)	5.26884e-05
IFNGR1	P307	0.000287002	0.04 (0.01)	0.000161833	0.06 (0.01)	3.42867e-05	0.07 (0.01)	5.19631e-05	0.06 (0.06)	-5.5e-05	0.06 (0.04)	-1.65022e-06	0.1 (0.01)	0.00356847	0.04 (0.01)	0.000263433	0.06 (0.03)	-1.80014e-05	0.05 (0.02)	-7.43627e-05	0.05 (0)	0.000245	0.04 (0.01)	0.000445595
IFNGR2	E164	0.000266672	0.11 (0.05)	-0.000123333	0.05 (0.01)	0.000117872	0.07 (0.03)	7.10373e-05	0.12 (0.12)	9e-06	0.09 (0.03)	3.38845e-06	0.06 (0.01)	0.00106412	0.12 (0.04)	0.000151	0.16 (0.09)	3.62518e-05	0.15 (0.03)	0.00117249	0.11 (0.01)	0.000128833	0.11 (0.02)	0.000378978
IFNGR2	P377	0.000507802	0.42 (0.14)	-9.53333e-05	0.37 (0.08)	4.43805e-05	0.66 (0.1)	0.000592122	0.39 (0.11)	-3.6e-05	0.24 (0.09)	0.000159108	0.36 (0.12)	6.17008e-05	0.6 (0.1)	0.000184233	0.18 (0.1)	0.000346011	0.51 (0.12)	-0.000281299	0.57 (0.23)	0.000116167	0.56 (0.09)	0.0017248
IGF1	E394	0.0019608	0.5 (0.19)	0.000445167	0.83 (0.04)	0.00120517	0.53 (0.16)	0.0016459	0.6 (0.09)	0.000216	0.87 (0.03)	0.00386898	0.49 (0.16)	0.00151028	0.53 (0.05)	0.0011604	0.25 (0.13)	0.00249895	0.63 (0.06)	0.0010576	0.7 (0.04)	0.000464	0.65 (0.08)	0.00125336
IGF1	P933	0.00374842	0.38 (0.09)	0.000724833	0.57 (0.06)	0.00257605	0.18 (0.09)	0.00290587	0.33 (0.13)	0.00028	0.71 (0.06)	0.00856059	0.27 (0.11)	0.00261822	0.27 (0.09)	0.0014452	0.54 (0.12)	4.7279e-05	0.28 (0.06)	0.00178756	0.33 (0.12)	0.0006805	0.27 (0.08)	0.00310338
IGF1R	E186	0.000388502	0.03 (0.01)	1e-06	0.04 (0.01)	4.50196e-05	0.04 (0.01)	-7.3627e-06	0.03 (0.01)	3.6e-05	0.02 (0.01)	2.04899e-05	0.06 (0.02)	0.00130703	0.03 (0)	0.000121267	0.03 (0.01)	-1.05981e-06	0.03 (0.01)	-6.17817e-05	0.03 (0.01)	9.5e-06	0.03 (0.01)	0.00132251
IGF1R	P325	0.000150072	0.04 (0.01)	4.66667e-05	0.02 (0)	0.000319693	0.02 (0.01)	0.000468223	0.04 (0)	1.5e-05	0.04 (0.01)	5.87269e-05	0.03 (0.01)	3.3519e-05	0.05 (0.01)	0.0001016	0.04 (0.01)	3.99095e-05	0.05 (0.01)	-2.92591e-07	0.04 (0)	-2.43333e-05	0.04 (0.01)	0.000220426
IGF2	E134	2.35681e-05	0.1 (0.06)	-2.66667e-06	0.08 (0.04)	8.41857e-06	0.12 (0.22)	1.0219e-05	0.05 (0.01)	5.8e-05	0.1 (0.07)	8.9547e-07	0.08 (0.1)	5.59373e-05	0.15 (0.07)	-2.1e-05	0.2 (0.16)	8.31272e-06	0.19 (0.07)	4.08059e-05	0.15 (0.08)	-5.21667e-05	0.19 (0.07)	5.83364e-05
IGF2	P1036	0.000573719	0.08 (0.01)	4.96667e-05	0.03 (0.01)	0.000439042	0.04 (0.02)	0.000527686	0.09 (0.04)	-0.000264	0.06 (0.02)	8.85542e-05	0.03 (0.01)	0.00244278	0.08 (0.02)	0.0002979	0.14 (0.05)	0.000126034	0.11 (0.03)	0.000680727	0.1 (0.03)	0.000144667	0.09 (0.01)	0.00108769
IGF2	P36	1.51012e-05	0.16 (0.07)	-1.88333e-05	0.1 (0.07)	4.57334e-06	0.09 (0.09)	2.83048e-05	0.06 (0.01)	9.5e-05	0.11 (0.06)	2.3015e-06	0.1 (0.04)	7.15238e-06	0.12 (0.05)	-3.17333e-05	0.15 (0.09)	4.16789e-07	0.18 (0.08)	0.000136587	0.14 (0.04)	5.16667e-06	0.13 (0.04)	2.283e-06
IGF2AS	E4	0.00103318	0.36 (0.06)	0.000277	0.13 (0.02)	0.00315522	0.16 (0.08)	0.000457165	0.34 (0.14)	1.4e-05	0.29 (0.04)	0.00119593	0.15 (0.03)	0.00231452	0.33 (0.06)	0.0003896	0.23 (0.08)	9.76718e-05	0.33 (0.06)	0.000186731	0.36 (0.04)	0.000246833	0.31 (0.05)	0.00048358
IGF2AS	P203	8.62656e-05	0.29 (0.1)	-2.88333e-05	0.29 (0.11)	-5.4821e-07	0.34 (0.11)	1.28579e-05	0.05 (0)	0.000273	0.22 (0.08)	3.71897e-05	0.35 (0.11)	1.10968e-05	0.28 (0.12)	-1.71333e-05	0.41 (0.17)	2.72872e-07	0.35 (0.1)	-8.14739e-05	0.41 (0.23)	-4.98333e-05	0.35 (0.08)	0.000330699
IGF2R	P396	0.00149626	0.17 (0.05)	0.000592833	0.05 (0.01)	0.00136462	0.06 (0.05)	0.00150002	0.12 (0.03)	-8.7e-05	0.1 (0.02)	0.00029459	0.06 (0.01)	0.00366955	0.19 (0.02)	0.0016978	0.09 (0.03)	0.000555181	0.15 (0.04)	-7.43875e-05	0.14 (0.02)	1.88333e-05	0.17 (0.04)	0.00358064
IGFBP1	E48	0.000133988	0.69 (0.18)	0.000175667	0.4 (0.1)	7.25083e-06	0.37 (0.12)	0.000232247	0.53 (0.43)	-4.9e-05	0.37 (0.08)	0.000141195	0.56 (0.1)	7.05302e-05	0.47 (0.16)	3.07667e-05	0.78 (0.06)	0.000429381	0.58 (0.12)	3.27936e-05	0.59 (0.1)	6.41667e-05	0.56 (0.08)	0.000132765
IGFBP1	P12	0.000311124	0.64 (0.08)	0.000278667	0.49 (0.12)	2.25741e-05	0.27 (0.13)	0.000313794	0.24 (0.35)	1.9e-05	0.29 (0.09)	0.000298186	0.48 (0.11)	0.000120418	0.36 (0.11)	0.000209067	0.82 (0.11)	0.00186219	0.54 (0.12)	3.61682e-05	0.5 (0.14)	6.28333e-05	0.5 (0.1)	0.00012288
IGFBP2	P306	4.04809e-05	0.06 (0.04)	-2.95e-05	0.04 (0.02)	-1.22902e-06	0.03 (0.01)	0.000154807	0.07 (0.09)	1e-06	0.02 (0.01)	3.58424e-05	0.09 (0.06)	2.52873e-05	0.1 (0.05)	0.000123533	0.04 (0.02)	6.05077e-06	0.13 (0.14)	0.00013879	0.06 (0.02)	-3.03333e-05	0.08 (0.03)	3.23667e-05
IGFBP2	P353	7.57312e-05	0.14 (0.04)	0.0002845	0.12 (0.04)	2.3215e-05	0.12 (0.05)	0.000130058	0.09 (0.1)	4.8e-05	0.15 (0.05)	5.12159e-06	0.19 (0.05)	2.59706e-05	0.25 (0.06)	0.0002274	0.21 (0.09)	-1.67922e-06	0.29 (0.11)	0.00023968	0.18 (0.05)	-8.15e-05	0.23 (0.05)	0.000126508
IGFBP3	E65	0.00129737	0.06 (0.02)	0.000127833	0.13 (0.01)	0.00347501	0.12 (0.04)	-0.00028612	0.08 (0.08)	-0.00015	0.04 (0.01)	0.00164488	0.19 (0.03)	0.00705101	0.05 (0.01)	0.000287733	0.05 (0.01)	7.93601e-05	0.06 (0.01)	0.000247019	0.04 (0.01)	0.000157333	0.05 (0.01)	0.000305054
IGFBP3	P1035	4.07564e-05	0.07 (0.02)	0.000291667	0.02 (0.01)	8.66952e-06	0.02 (0.01)	0.000141263	0.06 (0.06)	-3.1e-05	0.03 (0.01)	3.52139e-05	0.08 (0.04)	0.000103674	0.05 (0.01)	5.66667e-05	0.08 (0.08)	8.78226e-06	0.05 (0.02)	7.49624e-05	0.05 (0.02)	-4.16667e-05	0.04 (0.01)	1.10034e-05
IGFBP3	P423	0.000132577	0.09 (0.05)	2.33333e-06	0.05 (0.03)	1.35551e-05	0.02 (0.01)	0.00085957	0.06 (0.06)	4e-06	0.04 (0.02)	3.18055e-05	0.12 (0.1)	-5.21683e-05	0.06 (0.03)	-1.10667e-05	0.15 (0.11)	1.78104e-05	0.19 (0.19)	0.000200282	0.15 (0.14)	-5.28333e-05	0.09 (0.03)	0.000256579
IGFBP5	E144	0.000639151	0.06 (0.02)	-0.000285333	0.05 (0.02)	2.14979e-05	0.04 (0.02)	0.000797675	0.06 (0.06)	-0.000197	0.05 (0.02)	7.27974e-05	0.03 (0.01)	0.00226493	0.06 (0.02)	0.000207733	0.16 (0.07)	0.000208867	0.11 (0.04)	0.000983162	0.1 (0.04)	0.000257667	0.1 (0.03)	0.00145919
IGFBP5	P9	2.74567e-05	0.1 (0.06)	-4.15e-05	0.19 (0.08)	8.42497e-05	0.04 (0.02)	0.000155872	0.06 (0.05)	7.1e-05	0.14 (0.06)	5.92413e-06	0.11 (0.07)	-9.4619e-06	0.08 (0.05)	2.6e-06	0.11 (0.07)	-6.73882e-07	0.13 (0.08)	-2.62604e-05	0.09 (0.06)	6.5e-06	0.13 (0.06)	3.2597e-05
IGFBP6	E47	1.33645e-05	0.36 (0.03)	-2.93333e-05	0.42 (0.04)	1.04214e-05	0.45 (0.07)	0.000150556	0.18 (0.16)	6e-05	0.35 (0.06)	-5.91224e-07	0.37 (0.03)	2.8254e-06	0.33 (0.06)	-8.96667e-06	0.35 (0.07)	4.97106e-06	0.37 (0.05)	-1.14391e-05	0.34 (0.04)	4.86667e-05	0.36 (0.04)	1.07801e-05
IGFBP6	P328	3.67984e-05	0.13 (0.08)	-7.16667e-06	0.09 (0.06)	1.58948e-06	0.04 (0.02)	0.000374375	0.23 (0.19)	-4.1e-05	0.15 (0.05)	1.59379e-05	0.06 (0.03)	4.80103e-05	0.11 (0.07)	-3.73333e-05	0.19 (0.07)	2.11743e-05	0.17 (0.07)	4.57283e-05	0.13 (0.09)	-3.88333e-05	0.14 (0.06)	2.0448e-05
IGFBP7	P297	0.00101251	0.42 (0.05)	0.000237	0.14 (0.03)	0.00167682	0.15 (0.09)	0.00185929	0.39 (0.07)	0.000122	0.39 (0.06)	0.000434939	0.18 (0.04)	0.00377641	0.4 (0.11)	-0.0002784	0.53 (0.12)	0.000171048	0.51 (0.06)	0.00158535	0.42 (0.07)	0.000109167	0.44 (0.05)	0.000969531
IGFBP7	P371	5.32398e-05	0.04 (0.01)	1.9e-05	0.02 (0)	2.95883e-05	0.03 (0.01)	0.000144066	0.03 (0.01)	-6e-06	0.03 (0.01)	5.90464e-06	0.04 (0.02)	0.00032438	0.03 (0)	6.32667e-05	0.05 (0.05)	9.87078e-06	0.07 (0.1)	0.000119317	0.03 (0.01)	-9.01667e-05	0.04 (0.01)	4.81652e-05
IGSF4	P454	5.04512e-05	0.03 (0.01)	-1.08333e-05	0.02 (0)	6.06521e-05	0.02 (0.01)	0.000179216	0.05 (0.02)	1.9e-05	0.02 (0.01)	2.1894e-05	0.03 (0.01)	-2.86286e-05	0.03 (0.01)	0.000105433	0.03 (0.01)	1.66515e-06	0.03 (0.01)	8.61539e-05	0.04 (0.01)	2.18333e-05	0.03 (0.01)	7.11782e-05
IGSF4	P86	4.90634e-05	0.11 (0.06)	-1.26667e-05	0.06 (0.05)	-4.64944e-08	0.04 (0.02)	0.000381734	0.14 (0.17)	-5e-06	0.08 (0.04)	5.14322e-06	0.14 (0.12)	-1.74206e-05	0.1 (0.02)	6.21e-05	0.1 (0.05)	4.94116e-06	0.13 (0.05)	-1.93838e-05	0.14 (0.05)	0.000202667	0.12 (0.04)	9.94801e-05
IGSF4C	E65	0.00123899	0.77 (0.02)	0.0013045	0.36 (0.07)	0.000734871	0.28 (0.14)	0.00282944	0.62 (0.12)	-0.000131	0.57 (0.07)	9.37744e-05	0.37 (0.04)	0.00515731	0.73 (0.04)	0.00108107	0.71 (0.1)	0.000239261	0.68 (0.09)	0.000104801	0.71 (0.02)	0.000537333	0.69 (0.06)	0.00252796
IGSF4C	P533	4.01243e-05	0.07 (0.02)	-3.5e-06	0.06 (0.01)	7.75469e-06	0.05 (0.01)	0.000234365	0.04 (0.01)	0.000147	0.07 (0.03)	-1.03459e-06	0.07 (0.02)	-2.06016e-05	0.07 (0.03)	-0.0001036	0.13 (0.06)	2.46263e-05	0.08 (0.04)	-2.50651e-05	0.06 (0.02)	-6.23333e-05	0.07 (0.01)	0.000117028
			Bladder (n=5)		Blood (n=30)		Brain (n=12)		Cervix (n=3)		Infant blood (n=55)		Head and neck (n=11)		Kidney (n=6)		Placenta (n=19)		Pleura (n=18)		Small intestine (n=5)		Lung (n=53)
GENE	CpG	Mean decrease in accuracy	Mean (sd)	Decrease in accuracy	Mean (sd)	Decrease in accuracy	Mean (sd)	Decrease in accuracy	Mean (sd)	Decrease in accuracy	Mean (sd)	Decrease in accuracy	Mean (sd)	Decrease in accuracy	Mean (sd)	Decrease in accuracy	Mean (sd)	Decrease in accuracy	Mean (sd)	Decrease in accuracy	Mean (sd)	Decrease in accuracy	Mean (sd)	Decrease in accuracy
IHH	E186	3.02016e-05	0.07 (0.05)	-2.51667e-05	0.06 (0.08)	4.62028e-06	0.06 (0.08)	3.98548e-05	0.09 (0.08)	-8e-06	0.09 (0.04)	6.17178e-06	0.1 (0.07)	5.3119e-06	0.1 (0.05)	-5.24e-05	0.26 (0.19)	1.32697e-05	0.15 (0.09)	0.000220785	0.08 (0.02)	5.56667e-05	0.1 (0.03)	2.73987e-05
IHH	P246	5.73904e-05	0.14 (0.07)	-6.4e-05	0.07 (0.02)	0.000111851	0.07 (0.03)	0.000163782	0.21 (0.16)	1.5e-05	0.15 (0.03)	4.64148e-05	0.11 (0.06)	7.93175e-06	0.15 (0.05)	8.76667e-06	0.19 (0.08)	9.06465e-06	0.17 (0.05)	7.27083e-05	0.13 (0.01)	7.73333e-05	0.15 (0.04)	5.26529e-05
IHH	P529	1.77384e-05	0.07 (0.02)	1e-06	0.04 (0.01)	6.1874e-05	0.05 (0.02)	1.16968e-05	0.04 (0)	9.6e-05	0.06 (0.02)	9.51949e-07	0.07 (0.03)	-3.49286e-06	0.08 (0.02)	5.08e-05	0.08 (0.03)	1.00858e-05	0.1 (0.11)	8.42725e-06	0.07 (0.01)	1.25e-05	0.07 (0.03)	1.37728e-05
IL10	P348	0.00287476	0.93 (0.02)	0.000625833	0.71 (0.09)	0.00420709	0.94 (0.02)	0.00236211	0.95 (0.01)	0.000329	0.62 (0.14)	0.00444267	0.93 (0.05)	0.000924071	0.93 (0.01)	0.00123617	0.96 (0.01)	0.00301431	0.94 (0.03)	0.000885015	0.94 (0.02)	0.000599333	0.93 (0.02)	0.00249939
IL10	P85	0.0063223	0.72 (0.04)	0.00145133	0.23 (0.08)	0.00968277	0.86 (0.07)	0.0051658	0.7 (0.13)	0.00067	0.17 (0.06)	0.0087853	0.82 (0.13)	0.0042746	0.66 (0.04)	0.00284693	0.91 (0.05)	0.00608766	0.78 (0.11)	0.00310401	0.78 (0.09)	0.00123533	0.76 (0.08)	0.00559885
IL11	P11	1.45814e-05	0.07 (0.04)	-9.5e-05	0.05 (0.01)	7.0188e-06	0.06 (0.03)	-8.38175e-06	0.05 (0.01)	7.7e-05	0.06 (0.02)	1.04716e-06	0.05 (0.02)	1.06048e-05	0.11 (0.03)	0.000341067	0.1 (0.06)	1.93247e-06	0.08 (0.03)	3.33075e-05	0.07 (0.03)	6.16667e-06	0.07 (0.02)	1.08295e-05
IL12A	E287	2.9468e-05	0.04 (0.01)	-3.65e-05	0.03 (0.01)	5.56208e-06	0.02 (0.01)	5.76643e-05	0.02 (0)	6.1e-05	0.04 (0.01)	4.7747e-07	0.02 (0.01)	0.0001316	0.03 (0.01)	-3.29667e-05	0.04 (0.01)	-7.11664e-06	0.05 (0.01)	0.00027263	0.03 (0.01)	2.15e-05	0.04 (0.01)	-1.46931e-05
IL12B	E25	0.000176589	0.91 (0.02)	-1.75e-05	0.92 (0.01)	6.10628e-05	0.93 (0.03)	0.00017547	0.91 (0.04)	-3.8e-05	0.87 (0.03)	0.000104449	0.91 (0.02)	0.000107048	0.91 (0.02)	9.82e-05	0.81 (0.08)	0.000776661	0.91 (0.04)	1.32405e-05	0.91 (0.01)	0.000132333	0.92 (0.02)	0.000202314
IL12B	P1453	0.000310183	0.82 (0.02)	5.7e-05	0.89 (0.01)	0.000755163	0.81 (0.05)	0.000252025	0.62 (0.23)	8.7e-05	0.88 (0.03)	6.85439e-05	0.78 (0.05)	0.000347413	0.76 (0.09)	0.0001838	0.65 (0.08)	0.000561553	0.82 (0.05)	0.000194003	0.78 (0.04)	0.000161333	0.83 (0.03)	0.000319239
IL12B	P392	9.03541e-05	0.7 (0.12)	9.55e-05	0.81 (0.12)	6.77866e-06	0.81 (0.06)	8.74056e-05	0.46 (0.33)	4.4e-05	0.8 (0.13)	1.09201e-05	0.73 (0.07)	0.00010116	0.66 (0.26)	1.47333e-05	0.28 (0.17)	0.000724545	0.79 (0.09)	4.49928e-05	0.82 (0.05)	7.2e-05	0.76 (0.16)	1.45265e-05
IL13	E75	2.72682e-05	0.94 (0.02)	5.41667e-05	0.94 (0.02)	1.16953e-05	0.95 (0.01)	-1.63889e-06	0.94 (0.02)	-2.9e-05	0.96 (0.02)	2.22829e-06	0.94 (0.01)	0.000153108	0.95 (0.01)	-1.25333e-05	0.96 (0.02)	1.19407e-05	0.96 (0.01)	1.98333e-05	0.96 (0)	4.7e-05	0.95 (0.01)	5.58771e-05
IL16	P93	0.00464471	0.56 (0.04)	0.001345	0.51 (0.17)	0.00595879	0.6 (0.12)	0.00260682	0.71 (0.05)	0.000356	0.86 (0.03)	0.012363	0.65 (0.14)	0.000185981	0.69 (0.08)	0.0014236	0.63 (0.17)	0.000708796	0.7 (0.12)	0.00162231	0.7 (0.07)	-6.96667e-05	0.72 (0.07)	0.00137457
IL17RB	E164	0.00017376	0.15 (0.07)	-3.16667e-05	0.13 (0.05)	2.50029e-06	0.04 (0.02)	0.000341997	0.15 (0.19)	-2e-06	0.07 (0.04)	4.34657e-05	0.13 (0.06)	5.39786e-05	0.14 (0.07)	3.53333e-05	0.05 (0.04)	0.000140534	0.18 (0.1)	-0.000196474	0.14 (0.09)	-8.61667e-05	0.19 (0.07)	0.000597937
IL17RB	P788	3.71218e-05	0.03 (0.01)	-2.25e-05	0.02 (0.01)	1.40994e-05	0.05 (0.03)	1.00968e-05	0.03 (0.01)	9e-06	0.03 (0.02)	3.30385e-06	0.03 (0.01)	1.30929e-05	0.04 (0.02)	-5.93667e-05	0.04 (0.02)	2.3663e-07	0.06 (0.05)	4.3787e-05	0.04 (0.01)	1.98333e-05	0.05 (0.01)	0.00012056
IL18BP	E285	0.00030869	0.79 (0.03)	5.33333e-06	0.86 (0.02)	0.000183158	0.86 (0.05)	0.000123967	0.68 (0.14)	0.000139	0.87 (0.03)	0.000134728	0.84 (0.06)	0.000136144	0.78 (0.08)	-6.6e-05	0.82 (0.05)	2.80626e-05	0.76 (0.05)	0.000143071	0.81 (0.03)	-0.000133167	0.71 (0.08)	0.000912394
IL18BP	P51	0.0101133	0.62 (0.13)	0.00204983	0.04 (0.01)	0.0118051	0.73 (0.05)	0.0165516	0.69 (0.32)	0.000805	0.06 (0.02)	0.00870301	0.65 (0.14)	0.00877668	0.77 (0.07)	0.0122332	0.79 (0.06)	0.0167532	0.52 (0.1)	0.00287637	0.61 (0.14)	0.002801	0.45 (0.09)	0.0114864
IL1A	E113	6.05905e-05	0.95 (0.01)	0.000369	0.97 (0.01)	2.76394e-05	0.97 (0.01)	0.000133268	0.96 (0.01)	-9e-05	0.95 (0.01)	2.56757e-05	0.95 (0.01)	0.000249695	0.95 (0.01)	0.000221367	0.96 (0.02)	4.5866e-06	0.97 (0.01)	6.38677e-05	0.97 (0)	0.000273667	0.96 (0.01)	1.79569e-05
IL1B	P582	0.000232382	0.88 (0.01)	0.000359333	0.89 (0.02)	1.81236e-05	0.9 (0.02)	5.72222e-07	0.94 (0.01)	0.000206	0.88 (0.02)	1.22526e-05	0.91 (0.02)	0.000138055	0.87 (0.05)	-3.38667e-05	0.9 (0.04)	1.5209e-05	0.88 (0.05)	4.30778e-05	0.8 (0.19)	6.81667e-05	0.91 (0.02)	0.000811897
IL1B	P829	0.00178153	0.52 (0.09)	-2e-05	0.71 (0.04)	0.00145316	0.7 (0.12)	0.000804922	0.46 (0.12)	4e-05	0.4 (0.09)	0.000362356	0.75 (0.04)	0.00447314	0.53 (0.11)	0.000458933	0.43 (0.07)	0.000178105	0.4 (0.05)	0.00464399	0.57 (0.03)	0.001072	0.51 (0.07)	0.0033164
IL1RN	E42	0.000144583	0.84 (0.06)	0.000172333	0.94 (0.01)	7.94601e-05	0.91 (0.07)	0.000321475	0.46 (0.28)	0.000283	0.92 (0.03)	2.67238e-05	0.6 (0.19)	0.000976138	0.86 (0.04)	0.000302733	0.93 (0.03)	0.000106134	0.84 (0.06)	0.000214846	0.81 (0.14)	5.66667e-06	0.86 (0.04)	5.95956e-05
IL1RN	P93	0.00226291	0.62 (0.1)	0.000522	0.93 (0.01)	0.0102568	0.8 (0.11)	0.0010577	0.23 (0.34)	0.000362	0.85 (0.03)	0.00060261	0.48 (0.2)	0.00161239	0.76 (0.07)	0.000449167	0.85 (0.02)	0.00149621	0.67 (0.06)	0.00107835	0.66 (0.13)	0.000386	0.7 (0.07)	0.00140041
IL2	P607	0.000293394	0.84 (0.05)	0.0002105	0.91 (0.05)	4.50532e-05	0.92 (0.01)	0.00223691	0.8 (0.04)	0.000252	0.91 (0.02)	5.63686e-05	0.76 (0.11)	0.00179721	0.88 (0.02)	0.0001726	0.79 (0.08)	0.000300161	0.87 (0.03)	0.000147629	0.85 (0.05)	0.0001475	0.86 (0.03)	6.0149e-05
IL3	P556	2.9842e-05	0.95 (0.01)	-3.26667e-05	0.96 (0)	8.06123e-05	0.96 (0.01)	9.2373e-06	0.94 (0.03)	-3.2e-05	0.94 (0.02)	1.58276e-05	0.95 (0.01)	3.0004e-05	0.95 (0.01)	3.95667e-05	0.96 (0.02)	2.64055e-06	0.96 (0.01)	3.93184e-05	0.96 (0)	3.83333e-05	0.95 (0.01)	3.49519e-05
IL4	P262	7.09908e-05	0.87 (0.02)	9.1e-05	0.79 (0.12)	7.56284e-05	0.85 (0.03)	-7.17723e-05	0.89 (0.04)	7.7e-05	0.87 (0.03)	1.37432e-05	0.8 (0.03)	0.000767956	0.87 (0.04)	3.74667e-05	0.88 (0.04)	7.78506e-06	0.87 (0.02)	5.43756e-05	0.83 (0.06)	2.7e-05	0.87 (0.03)	5.15148e-05
IL6	E168	0.000230281	0.21 (0.1)	-4.15e-05	0.12 (0.04)	0.000180195	0.16 (0.08)	2.30873e-06	0.18 (0.08)	-2.3e-05	0.26 (0.06)	0.00011923	0.19 (0.07)	2.15556e-05	0.17 (0.05)	0.0001866	0.31 (0.13)	8.09533e-06	0.29 (0.07)	0.000664554	0.38 (0.23)	0.000445	0.22 (0.05)	0.000426799
IL6	P213	0.000188939	0.11 (0.03)	4.96667e-05	0.08 (0.04)	1.46137e-05	0.38 (0.17)	0.00198381	0.11 (0.09)	-2.6e-05	0.05 (0.02)	0.000145652	0.09 (0.06)	2.92476e-05	0.14 (0.04)	8.32333e-05	0.17 (0.08)	1.91917e-05	0.14 (0.06)	-5.63914e-05	0.14 (0.04)	3.11667e-05	0.14 (0.04)	0.000162664
IL6	P611	0.000200434	0.13 (0.04)	2.65e-05	0.02 (0.01)	0.000960755	0.22 (0.14)	0.000306472	0.19 (0.15)	-5e-05	0.07 (0.03)	1.36842e-05	0.12 (0.05)	0.000122489	0.1 (0.04)	-6.66667e-07	0.07 (0.04)	-2.89394e-07	0.14 (0.08)	5.69365e-05	0.1 (0.03)	2.6e-05	0.12 (0.05)	0.000128702
IL8	E118	0.00174337	0.25 (0.13)	9.43333e-05	0.1 (0.05)	0.000446884	0.76 (0.11)	0.00715436	0.16 (0.11)	-6e-06	0.41 (0.11)	0.000279658	0.19 (0.07)	0.00104785	0.57 (0.1)	0.0042992	0.48 (0.12)	0.00171411	0.25 (0.08)	-8.78721e-05	0.32 (0.13)	0.000493167	0.19 (0.06)	0.0037764
IL8	P83	0.000962121	0.7 (0.13)	0.000133667	0.15 (0.07)	0.000456401	0.91 (0.06)	0.00438293	0.38 (0.31)	-5.3e-05	0.55 (0.14)	8.74641e-05	0.49 (0.19)	0.000142054	0.88 (0.04)	0.00332693	0.34 (0.2)	7.92207e-05	0.56 (0.21)	0.00140271	0.63 (0.25)	0.000482	0.45 (0.14)	0.00174089
IMPACT	P186	0.000115237	0.05 (0.01)	-3.33333e-05	0.02 (0.01)	0.000301213	0.05 (0.02)	7.10389e-05	0.07 (0.05)	-1.2e-05	0.03 (0.02)	-6.72787e-07	0.04 (0.01)	-2.01905e-05	0.07 (0.02)	0.000555867	0.04 (0.04)	5.68235e-05	0.05 (0.03)	7.48681e-05	0.05 (0.03)	-5.35e-05	0.04 (0.01)	0.000191315
IMPACT	P234	7.19182e-05	0.05 (0.02)	-1.2e-05	0.07 (0.02)	6.18188e-07	0.05 (0.02)	0.000118829	0.04 (0)	8.6e-05	0.05 (0.03)	3.51661e-06	0.13 (0.06)	0.00120184	0.05 (0.01)	0.0001209	0.05 (0.04)	3.84182e-06	0.08 (0.05)	-3.66818e-06	0.06 (0.03)	-3.03333e-05	0.07 (0.03)	1.68975e-05
INHA	P1144	0.000351095	0.11 (0.02)	2.6e-05	0.03 (0.01)	0.00102548	0.04 (0.03)	0.000290333	0.09 (0.08)	-5.2e-05	0.08 (0.02)	0.000298749	0.04 (0.02)	0.00052655	0.1 (0.03)	-6.92667e-05	0.23 (0.17)	7.48763e-05	0.13 (0.02)	0.000336844	0.1 (0.01)	7.11667e-05	0.12 (0.03)	0.000215379
INHA	P1189	0.000802437	0.11 (0.03)	-3.56667e-05	0.04 (0.01)	0.00333805	0.04 (0.03)	0.000505893	0.12 (0.07)	-1.4e-05	0.11 (0.03)	0.000942087	0.05 (0.02)	0.000503557	0.12 (0.02)	0.000144033	0.17 (0.09)	3.47789e-05	0.14 (0.04)	0.000185683	0.1 (0.01)	1.01667e-05	0.11 (0.03)	0.000133084
INS	P248	0.000489177	0.82 (0.05)	0.0001195	0.86 (0.05)	5.54368e-06	0.85 (0.05)	0.0002575	0.85 (0.07)	-2e-06	0.84 (0.05)	2.20553e-05	0.84 (0.02)	0.000285726	0.84 (0.05)	0.000167467	0.51 (0.15)	0.00419148	0.89 (0.02)	0.000294349	0.88 (0.02)	0.000176333	0.87 (0.04)	0.000212238
INS	P804	0.000733925	0.93 (0.02)	0.0001375	0.95 (0.01)	5.09448e-05	0.92 (0.02)	0.000377715	0.93 (0.03)	1.9e-05	0.94 (0.02)	1.47292e-05	0.93 (0.02)	0.000466613	0.94 (0.02)	0.0002752	0.77 (0.05)	0.00675648	0.95 (0.02)	0.000435898	0.95 (0.01)	0.0001565	0.93 (0.1)	0.000228247
INSR	E97	3.42451e-05	0.22 (0.02)	0.000612333	0.12 (0.03)	1.43287e-05	0.12 (0.04)	4.66341e-05	0.14 (0.1)	1.5e-05	0.16 (0.05)	-4.45706e-07	0.13 (0.05)	3.38714e-05	0.17 (0.03)	-9.88e-05	0.19 (0.07)	8.33983e-07	0.2 (0.04)	8.13835e-05	0.16 (0.02)	7.38333e-05	0.17 (0.07)	4.20944e-05
INSR	P1063	7.65071e-05	0.22 (0.07)	2.76667e-05	0.12 (0.07)	4.02858e-06	0.1 (0.05)	2.89e-05	0.04 (0.01)	0.000212	0.11 (0.06)	4.07297e-06	0.12 (0.06)	2.24524e-06	0.16 (0.07)	-2.97333e-05	0.15 (0.13)	-2.51249e-07	0.27 (0.16)	1.2193e-05	0.2 (0.1)	-8.33333e-07	0.18 (0.05)	0.000294728
IPF1	P234	0.000457258	0.31 (0.11)	-3.33333e-07	0.33 (0.06)	1.70612e-05	0.28 (0.18)	0.00015294	0.45 (0.36)	-6.3e-05	0.21 (0.07)	0.000213489	0.47 (0.15)	2.84119e-05	0.36 (0.09)	-1.22667e-05	0.58 (0.21)	3.81237e-05	0.45 (0.14)	-0.000242905	0.32 (0.09)	-6.76667e-05	0.45 (0.06)	0.00170933
IPF1	P750	0.000790552	0.35 (0.13)	0.000138667	0.37 (0.11)	3.35495e-05	0.38 (0.17)	0.000420498	0.32 (0.33)	1.69737e-22	0.28 (0.1)	8.91914e-05	0.55 (0.13)	0.000480837	0.42 (0.13)	0.000302667	0.91 (0.03)	0.00668795	0.55 (0.1)	0.000794956	0.5 (0.24)	-0.000131333	0.46 (0.11)	0.000329363
IRAK3	E130	5.85716e-05	0.04 (0.01)	-2.9e-05	0.02 (0)	0.000234443	0.07 (0.15)	8.83603e-05	0.04 (0)	3.3e-05	0.04 (0.01)	3.65973e-05	0.04 (0.02)	-2.95635e-05	0.06 (0.02)	1.86e-05	0.07 (0.03)	1.39905e-05	0.07 (0.04)	9.53592e-05	0.07 (0.06)	4.66667e-06	0.05 (0.01)	1.43995e-05
IRAK3	P13	8.29472e-05	0.05 (0.01)	4.5e-05	0.02 (0)	0.000182919	0.06 (0.13)	6.9427e-05	0.04 (0)	6.8e-05	0.03 (0.01)	4.80552e-06	0.04 (0.03)	0.000289606	0.05 (0.02)	0.0001263	0.04 (0.01)	8.39978e-06	0.07 (0.07)	0.000130402	0.06 (0.04)	-7.61667e-05	0.04 (0.01)	8.34016e-05
IRAK3	P185	0.0004708	0.44 (0.04)	0.0003215	0.08 (0.03)	0.00137761	0.35 (0.19)	8.63167e-05	0.32 (0.05)	0.000172	0.25 (0.07)	9.26203e-05	0.15 (0.05)	0.00187606	0.4 (0.11)	0.000164867	0.5 (0.14)	0.000264908	0.4 (0.11)	8.6494e-05	0.49 (0.11)	0.000383333	0.36 (0.07)	0.000467898
IRF5	E101	0.00058789	0.14 (0.07)	4e-05	0.12 (0.05)	3.27463e-05	0.1 (0.05)	-2.13127e-05	0.12 (0.1)	-0.000125	0.04 (0.02)	0.00125571	0.12 (0.05)	0.000105647	0.28 (0.09)	0.0007051	0.28 (0.12)	0.000696776	0.18 (0.1)	0.00014367	0.18 (0.07)	0.000108667	0.14 (0.05)	0.00074171
IRF5	P123	2.26936e-05	0.09 (0.03)	6.03333e-05	0.09 (0.01)	2.6429e-05	0.08 (0.02)	1.60881e-05	0.05 (0.03)	4.3e-05	0.09 (0.01)	8.52947e-06	0.08 (0.02)	1.82802e-05	0.09 (0.02)	-2.4e-05	0.12 (0.05)	8.84892e-06	0.12 (0.03)	5.63145e-05	0.1 (0.01)	-3.15e-05	0.11 (0.02)	3.62979e-05
IRF7	E236	0.00011483	0.22 (0.08)	0.000137	0.17 (0.05)	3.53236e-05	0.22 (0.12)	-7.05627e-05	0.1 (0.09)	0.000125	0.29 (0.06)	1.19958e-05	0.1 (0.03)	0.00149563	0.22 (0.09)	-4.19e-05	0.35 (0.13)	1.89301e-05	0.28 (0.05)	7.45282e-05	0.24 (0.05)	-7.83333e-06	0.25 (0.05)	0.000120117
IRF7	P277	0.000233917	0.05 (0.01)	0.000163833	0.02 (0.01)	6.6291e-05	0.14 (0.09)	0.000705718	0.04 (0.01)	-2.6e-05	0.03 (0.01)	4.46667e-05	0.03 (0.01)	0.000427193	0.06 (0.03)	5.29e-05	0.36 (0.16)	0.00117516	0.05 (0.02)	0.000146493	0.04 (0.01)	0.000108	0.04 (0.02)	9.1544e-05
ISL1	E87	0.000929951	0.3 (0.06)	0.000247167	0.06 (0.03)	0.00215384	0.13 (0.16)	0.000166398	0.18 (0.22)	-0.000176	0.27 (0.06)	0.000738924	0.11 (0.09)	0.000689111	0.31 (0.11)	-0.000520533	0.37 (0.1)	2.02576e-05	0.49 (0.09)	0.00501017	0.22 (0.04)	0.000523333	0.33 (0.08)	5.53435e-05
ISL1	P379	0.000175337	0.09 (0.03)	-5.75e-05	0.06 (0.03)	1.44504e-05	0.04 (0.06)	0.000171451	0.06 (0.06)	-9e-06	0.04 (0.01)	5.87253e-05	0.07 (0.06)	4.87357e-05	0.09 (0.03)	2.9e-06	0.12 (0.11)	-7.37815e-06	0.14 (0.1)	-3.32445e-05	0.09 (0.04)	2.33333e-05	0.12 (0.04)	0.00061507
ISL1	P554	0.000415937	0.13 (0.04)	-0.0001315	0.07 (0.04)	6.57466e-05	0.09 (0.05)	0.000169712	0.16 (0.21)	-1.1e-05	0.09 (0.05)	2.99234e-05	0.1 (0.07)	0.000143852	0.12 (0.06)	-5.38e-05	0.37 (0.25)	2.28709e-05	0.2 (0.15)	-7.37273e-05	0.11 (0.04)	9.9e-05	0.19 (0.05)	0.00159486
ITGA2	E120	0.000739205	0.06 (0.03)	-5.03333e-05	0.02 (0)	0.00319069	0.03 (0.02)	0.000125169	0.06 (0.05)	-2.9e-05	0.04 (0.01)	0.000829377	0.02 (0.01)	0.000624951	0.05 (0.01)	0.000146867	0.07 (0.03)	1.55097e-05	0.08 (0.02)	0.000326747	0.06 (0.01)	5.95e-05	0.06 (0.01)	9.17427e-05
ITGA2	P26	0.000103885	0.07 (0.04)	-0.000118833	0.05 (0.05)	1.48243e-05	0.04 (0.02)	9.31778e-05	0.03 (0)	0.000171	0.08 (0.04)	-1.10138e-06	0.05 (0.02)	0.000171186	0.08 (0.03)	-5.48667e-05	0.08 (0.06)	2.28026e-06	0.11 (0.03)	0.000510139	0.07 (0.03)	1.8e-05	0.09 (0.03)	0.000192361
ITGA6	P298	0.000370744	0.35 (0.05)	9.5e-05	0.05 (0.06)	0.000636967	0.16 (0.23)	9.48072e-05	0.3 (0.24)	-0.00016	0.32 (0.07)	0.000246098	0.05 (0.02)	0.00208178	0.28 (0.08)	0.000187867	0.47 (0.15)	5.36393e-05	0.43 (0.08)	0.000633773	0.32 (0.04)	0.000122333	0.33 (0.07)	0.000190023
ITGA6	P718	0.000518083	0.93 (0.02)	5.3e-05	0.97 (0)	0.00164143	0.97 (0.01)	0.00109958	0.96 (0.01)	3.4e-05	0.93 (0.02)	0.000788651	0.96 (0.01)	0.000124454	0.93 (0.03)	0.000125133	0.92 (0.03)	6.03698e-05	0.94 (0.01)	7.61899e-06	0.92 (0.04)	1.9e-05	0.95 (0.01)	5.5371e-05
ITGB1	P451	0.000803977	0.19 (0.03)	0.000116167	0.06 (0.02)	0.00156128	0.07 (0.06)	0.0010079	0.15 (0.1)	-0.000284	0.25 (0.06)	0.000437261	0.06 (0.03)	0.00272737	0.2 (0.07)	-7.02667e-05	0.25 (0.06)	6.06428e-05	0.25 (0.05)	0.000772167	0.21 (0.02)	0.000246667	0.2 (0.03)	0.000915558
ITGB4	E144	0.000378425	0.07 (0.02)	-6.65e-05	0.03 (0.01)	0.000376801	0.03 (0.01)	0.000562336	0.06 (0.04)	-6.78371e-22	0.06 (0.02)	2.91537e-05	0.03 (0.01)	0.00148363	0.06 (0.02)	-1.30667e-05	0.09 (0.04)	6.38442e-05	0.08 (0.02)	0.00103514	0.06 (0.01)	8.28333e-05	0.06 (0.02)	0.000503626
ITGB4	P517	0.000175832	0.21 (0.04)	0.000179333	0.16 (0.05)	7.05974e-05	0.2 (0.07)	-5.08563e-05	0.18 (0.14)	-0.000122	0.26 (0.06)	0.000134076	0.11 (0.02)	0.000981419	0.17 (0.06)	0.000268467	0.31 (0.1)	1.81027e-05	0.28 (0.05)	0.000516095	0.21 (0.06)	-5.65e-05	0.24 (0.05)	0.000151429
ITK	E166	4.20068e-05	0.93 (0.02)	-1.83333e-06	0.91 (0.03)	1.53926e-05	0.96 (0.01)	0.000605711	0.91 (0.05)	4.3e-05	0.92 (0.02)	2.11563e-05	0.94 (0.02)	8.85437e-05	0.95 (0.01)	-3.66333e-05	0.92 (0.05)	5.89848e-06	0.94 (0.02)	-1.52001e-05	0.95 (0.02)	3.96667e-05	0.94 (0.02)	-8.68039e-06
ITK	P114	0.000328393	0.88 (0.03)	0.000119167	0.89 (0.03)	2.36683e-05	0.94 (0.03)	0.0008823	0.87 (0.04)	1.4e-05	0.87 (0.04)	1.98733e-05	0.92 (0.02)	0.000194474	0.93 (0.02)	0.0001743	0.7 (0.09)	0.00239831	0.9 (0.05)	1.26123e-05	0.92 (0.03)	0.000167167	0.91 (0.03)	0.000148221
ITPR2	P804	9.91069e-05	0.07 (0.02)	5.3e-05	0.06 (0.01)	2.31851e-05	0.17 (0.1)	0.0011876	0.06 (0.01)	5.7e-05	0.05 (0.02)	1.73755e-05	0.08 (0.02)	0.000160314	0.08 (0.01)	0.000154767	0.09 (0.03)	3.54721e-05	0.11 (0.04)	9.88317e-05	0.08 (0.02)	-1.63333e-05	0.09 (0.03)	7.29096e-06
ITPR3	E86	2.57809e-05	0.04 (0.02)	1.21667e-05	0.03 (0)	3.65477e-05	0.05 (0.03)	2.23357e-05	0.03 (0.01)	-1.8e-05	0.03 (0.02)	2.89878e-06	0.04 (0.01)	7.92095e-05	0.04 (0.01)	-1.04e-05	0.04 (0.04)	-5.057e-07	0.04 (0.04)	-6.39056e-05	0.03 (0.01)	-4.9e-05	0.03 (0.01)	9.4314e-05
ITPR3	P1112	0.000130534	0.03 (0.01)	-6.21667e-05	0.03 (0)	7.59638e-05	0.04 (0.01)	0.00053056	0.03 (0)	-2.1e-05	0.02 (0.01)	5.73735e-06	0.04 (0.01)	0.00108433	0.03 (0)	0.000289233	0.03 (0.02)	1.64747e-06	0.03 (0.01)	-8.17288e-05	0.03 (0.01)	-5.18333e-05	0.02 (0.01)	0.000160587
JAG1	P66	0.00150033	0.1 (0.03)	5.11667e-05	0.04 (0.01)	0.00383811	0.06 (0.04)	0.00141925	0.07 (0.07)	5.4e-05	0.18 (0.05)	0.00138723	0.05 (0.01)	0.00299514	0.13 (0.05)	-0.000326467	0.12 (0.05)	2.61063e-06	0.18 (0.05)	0.000837354	0.12 (0.03)	7.15e-05	0.15 (0.04)	0.00132713
JAG2	E54	0.000147123	0.04 (0.01)	-0.000102667	0.02 (0)	0.000152232	0.02 (0.01)	5.74048e-06	0.12 (0.08)	0.000144	0.02 (0.01)	1.60821e-05	0.02 (0.01)	0.000113567	0.04 (0.01)	8.37333e-05	0.04 (0.02)	5.83795e-06	0.04 (0.01)	-6.70892e-06	0.04 (0.01)	-7.5e-06	0.04 (0.01)	0.000471723
JAG2	P264	5.56669e-05	0.04 (0.01)	-5.83333e-05	0.03 (0)	7.73163e-05	0.03 (0.01)	9.22341e-05	0.04 (0.01)	-1.8e-05	0.04 (0.02)	-1.95385e-06	0.03 (0)	0.000150279	0.05 (0.01)	2.24333e-05	0.05 (0.02)	2.63988e-06	0.06 (0.02)	0.000238547	0.04 (0.01)	8.56667e-05	0.06 (0.06)	4.27459e-05
JAK2	P772	0.000558376	0.08 (0.03)	7.23333e-05	0.02 (0.01)	0.000886493	0.03 (0.02)	0.000296284	0.04 (0)	0.000157	0.12 (0.06)	0.000332365	0.03 (0.01)	0.00294428	0.06 (0.01)	0.0005434	0.14 (0.06)	0.000102079	0.11 (0.03)	0.000553781	0.08 (0.02)	4.5e-05	0.08 (0.02)	0.000452775
JAK3	E64	0.00134621	0.12 (0.06)	0.0001655	0.03 (0.01)	0.000728678	0.12 (0.04)	0.000710275	0.09 (0.08)	0.000149	0.08 (0.02)	5.86994e-05	0.1 (0.08)	0.000617161	0.11 (0.05)	0.000314767	0.75 (0.09)	0.0116323	0.14 (0.08)	0.000280807	0.09 (0.03)	0.000158333	0.1 (0.03)	0.000646722
JAK3	P1075	0.00156509	0.78 (0.06)	0.000134167	0.71 (0.1)	0.00157048	0.82 (0.07)	-7.59643e-05	0.53 (0.33)	9.2e-05	0.9 (0.02)	0.00316416	0.5 (0.18)	0.00140238	0.81 (0.04)	0.000136233	0.88 (0.08)	0.00132833	0.8 (0.05)	-5.21156e-05	0.73 (0.12)	8.35e-05	0.76 (0.05)	0.00151429
JAK3	P156	0.00442593	0.34 (0.09)	0.000800333	0.02 (0)	0.0113342	0.51 (0.14)	0.00311926	0.42 (0.3)	0.000341	0.07 (0.03)	0.00382174	0.41 (0.24)	0.00168578	0.48 (0.16)	0.00170813	0.88 (0.05)	0.00777614	0.38 (0.15)	0.00181748	0.38 (0.23)	-0.000120833	0.31 (0.12)	0.00325115
JUNB	P1149	1.35851e-05	0.13 (0.02)	0.000205833	0.09 (0.01)	2.50624e-06	0.1 (0.01)	-4.88016e-06	0.09 (0.01)	6e-06	0.12 (0.02)	1.0438e-05	0.1 (0.02)	1.85794e-06	0.11 (0.01)	-2.33e-05	0.13 (0.03)	1.01626e-05	0.1 (0.02)	-1.04027e-05	0.09 (0.02)	7.08333e-05	0.1 (0.02)	1.94547e-05
KCNK4	E3	0.00115981	0.26 (0.08)	-0.000212333	0.34 (0.07)	0.00112075	0.09 (0.03)	0.00383123	0.26 (0.2)	-9.8e-05	0.15 (0.03)	0.00123511	0.24 (0.11)	0.000302421	0.21 (0.1)	-0.0002455	0.1 (0.03)	0.00198122	0.3 (0.11)	0.000536652	0.28 (0.04)	0.000342167	0.3 (0.07)	0.00112351
KCNK4	P171	4.05716e-05	0.5 (0.11)	-4.73333e-05	0.6 (0.09)	2.67506e-05	0.34 (0.16)	4.24302e-05	0.14 (0.04)	0.000247	0.46 (0.12)	1.10526e-06	0.44 (0.1)	-1.61905e-06	0.48 (0.1)	-1.26667e-05	0.46 (0.14)	-3.40152e-06	0.47 (0.07)	-5.90765e-07	0.5 (0.09)	1.83333e-06	0.48 (0.06)	0.000133704
KCNQ1	E349	0.000284286	0.12 (0.01)	0.000306667	0.04 (0.01)	9.00564e-05	0.05 (0.03)	0.000400437	0.05 (0.01)	0.000337	0.1 (0.03)	1.48266e-05	0.05 (0.01)	0.00152464	0.1 (0.03)	0.000191033	0.17 (0.09)	2.52368e-05	0.14 (0.03)	0.000700101	0.1 (0.03)	9.98333e-05	0.1 (0.03)	0.000365367
KCNQ1	P546	3.81045e-05	0.17 (0.04)	9e-06	0.24 (0.04)	4.18682e-05	0.25 (0.1)	7.70238e-06	0.14 (0.02)	9e-05	0.14 (0.06)	1.539e-05	0.29 (0.08)	0.000234229	0.22 (0.07)	-3.8e-05	0.33 (0.16)	1.14222e-05	0.21 (0.05)	8.46799e-06	0.19 (0.05)	1.58333e-05	0.19 (0.04)	5.3595e-05
KDR	E79	2.88099e-05	0.05 (0.02)	1.66667e-07	0.06 (0.01)	7.97324e-06	0.05 (0.01)	1.81508e-05	0.07 (0.05)	1.4e-05	0.05 (0.03)	3.4949e-06	0.08 (0.04)	-5.64524e-06	0.06 (0.03)	-2.76333e-05	0.09 (0.05)	-4.40034e-06	0.08 (0.04)	-2.38997e-05	0.19 (0.24)	-1.06667e-05	0.07 (0.02)	0.000122173
KDR	P445	0.000134009	0.04 (0.01)	0.0001475	0.03 (0.01)	3.70867e-06	0.02 (0.01)	0.000772261	0.05 (0.04)	4e-06	0.02 (0.01)	3.84633e-05	0.05 (0.03)	-1.97611e-05	0.03 (0.01)	0.0001718	0.23 (0.16)	0.000406436	0.05 (0.08)	8.82799e-06	0.19 (0.25)	0.000137167	0.04 (0.02)	0.000126792
KIAA0125	E29	0.00112035	0.9 (0.02)	0.000336333	0.95 (0.01)	0.00274299	0.87 (0.02)	0.0010377	0.84 (0.05)	8.6e-05	0.93 (0.02)	6.55517e-05	0.89 (0.02)	0.00103215	0.87 (0.06)	0.000602133	0.63 (0.12)	0.00394335	0.9 (0.02)	0.000534108	0.93 (0.01)	0.0007565	0.9 (0.02)	0.000759854
KIAA1804	P689	0.000555751	0.17 (0.04)	0.0005855	0.04 (0.01)	0.000426063	0.14 (0.06)	0.000228265	0.08 (0.08)	-4.2e-05	0.05 (0.02)	9.70967e-05	0.08 (0.02)	0.000229148	0.14 (0.04)	-9.93333e-06	0.16 (0.08)	4.36561e-05	0.2 (0.12)	0.00246493	0.14 (0.03)	-0.000179167	0.11 (0.03)	0.00100483
KIT	P367	0.000194439	0.08 (0.03)	-5.06667e-05	0.03 (0.01)	0.000467487	0.17 (0.05)	0.000819921	0.12 (0.14)	-1e-05	0.05 (0.02)	3.13974e-05	0.06 (0.03)	0.000279444	0.11 (0.02)	0.000261133	0.11 (0.04)	5.20032e-05	0.13 (0.09)	9.92954e-05	0.09 (0.02)	6.61667e-05	0.09 (0.03)	0.000150204
KIT	P405	0.000178811	0.1 (0.03)	-3.11667e-05	0.04 (0.02)	0.000106748	0.06 (0.06)	5.23302e-05	0.1 (0.06)	-2.6e-05	0.06 (0.02)	5.87263e-05	0.04 (0.02)	0.000711375	0.1 (0.03)	5.17e-05	0.11 (0.03)	4.14585e-05	0.14 (0.08)	0.000427201	0.09 (0.01)	9.35e-05	0.09 (0.02)	0.000275777
KLF5	E190	0.000657163	0.1 (0.03)	7.38333e-05	0.02 (0.01)	0.0013717	0.03 (0.02)	0.000486967	0.04 (0.02)	5.3e-05	0.07 (0.02)	0.000507209	0.03 (0.01)	0.00137003	0.07 (0.02)	-0.000142967	0.11 (0.05)	2.93318e-05	0.11 (0.04)	0.000395147	0.08 (0.01)	0.000184167	0.09 (0.02)	0.000821031
KLF5	P13	7.39719e-05	0.09 (0.05)	-2.1e-05	0.04 (0.01)	5.34538e-05	0.04 (0.02)	0.000121115	0.04 (0.04)	5e-06	0.07 (0.05)	-8.37224e-07	0.04 (0.01)	0.000365257	0.07 (0.03)	-3.35333e-05	0.12 (0.05)	3.42341e-05	0.1 (0.02)	0.000222002	0.08 (0.02)	2.96667e-05	0.08 (0.02)	8.79636e-05
KLK10	P268	0.000226116	0.19 (0.09)	1.88333e-05	0.09 (0.02)	4.07799e-05	0.35 (0.09)	0.000747599	0.07 (0.01)	0.00014	0.1 (0.03)	1.24489e-05	0.17 (0.05)	6.39746e-05	0.58 (0.11)	0.00620467	0.23 (0.11)	2.518e-05	0.15 (0.05)	0.000128825	0.11 (0.03)	7.96667e-05	0.13 (0.05)	7.19385e-05
			Bladder (n=5)		Blood (n=30)		Brain (n=12)		Cervix (n=3)		Infant blood (n=55)		Head and neck (n=11)		Kidney (n=6)		Placenta (n=19)		Pleura (n=18)		Small intestine (n=5)		Lung (n=53)
GENE	CpG	Mean decrease in accuracy	Mean (sd)	Decrease in accuracy	Mean (sd)	Decrease in accuracy	Mean (sd)	Decrease in accuracy	Mean (sd)	Decrease in accuracy	Mean (sd)	Decrease in accuracy	Mean (sd)	Decrease in accuracy	Mean (sd)	Decrease in accuracy	Mean (sd)	Decrease in accuracy	Mean (sd)	Decrease in accuracy	Mean (sd)	Decrease in accuracy	Mean (sd)	Decrease in accuracy
KLK11	P103	0.00059533	0.69 (0.1)	0.000419167	0.87 (0.03)	5.34872e-05	0.87 (0.03)	0.00115144	0.38 (0.31)	0.000379	0.89 (0.02)	0.000398796	0.67 (0.1)	0.00137029	0.78 (0.06)	0.0003332	0.38 (0.09)	0.00273201	0.8 (0.04)	0.000228019	0.72 (0.15)	3.88333e-05	0.8 (0.04)	0.000329904
KLK11	P1290	0.000600024	0.9 (0.02)	0.0001325	0.93 (0.01)	3.3515e-05	0.93 (0.01)	0.000386311	0.95 (0.01)	0.000227	0.92 (0.02)	1.89497e-05	0.91 (0.01)	0.000455071	0.91 (0.02)	0.000209567	0.77 (0.08)	0.00535933	0.92 (0.02)	0.000171954	0.93 (0.01)	0.000183833	0.92 (0.02)	0.00019541
KRAS	E82	1.37888e-05	0.64 (0.07)	-3.73333e-05	0.62 (0.1)	3.58172e-06	0.52 (0.15)	1.32992e-05	0.67 (0.05)	1.2e-05	0.51 (0.09)	3.25191e-05	0.6 (0.1)	-3.29762e-06	0.62 (0.1)	-5.32333e-05	0.66 (0.09)	2.84798e-06	0.68 (0.05)	1.6542e-05	0.64 (0.04)	1.61667e-05	0.66 (0.06)	1.99076e-05
KRAS	P651	0.000161762	0.08 (0.01)	0.000336667	0.05 (0.02)	4.88952e-05	0.05 (0.03)	5.68643e-05	0.11 (0.03)	0.000135	0.05 (0.01)	7.78188e-05	0.04 (0.01)	0.000682375	0.09 (0.02)	0.0003376	0.08 (0.02)	6.60695e-05	0.09 (0.02)	0.000175804	0.07 (0.01)	0.000143167	0.08 (0.02)	0.000208553
KRT1	P798	0.00313472	0.84 (0.03)	-0.000275333	0.89 (0.01)	0.00103027	0.92 (0.03)	0.00526379	0.88 (0.03)	0.000724	0.85 (0.03)	8.19929e-05	0.89 (0.03)	0.0055564	0.83 (0.02)	-0.000363833	0.52 (0.08)	0.00767574	0.78 (0.04)	0.00236825	0.85 (0.03)	0.000347	0.78 (0.04)	0.00626303
KRT13	P341	0.000279473	0.91 (0.03)	-4.2e-05	0.94 (0.01)	0.000282208	0.92 (0.01)	0.000258652	0.47 (0.35)	0.000182	0.92 (0.02)	1.2029e-05	0.71 (0.19)	0.000388493	0.93 (0.02)	0.0004274	0.91 (0.02)	5.15204e-05	0.88 (0.04)	-2.4498e-05	0.89 (0.06)	9.96667e-05	0.86 (0.05)	0.000748224
KRT13	P676	0.00171602	0.85 (0.03)	0.000711	0.78 (0.07)	9.32978e-05	0.93 (0.02)	0.00716637	0.83 (0)	0.000532	0.68 (0.06)	0.00125083	0.89 (0.04)	0.00510693	0.88 (0.02)	0.00396813	0.75 (0.05)	0.000538258	0.82 (0.03)	3.74126e-05	0.86 (0.04)	0.00175667	0.78 (0.11)	0.0021644
KRT5	E196	0.00123843	0.93 (0.02)	0.000404167	0.97 (0)	0.0058176	0.96 (0.02)	0.000669502	0.56 (0.28)	0.000326	0.94 (0.02)	0.000728909	0.79 (0.14)	0.000999529	0.91 (0.04)	0.000584633	0.87 (0.07)	0.00042764	0.92 (0.04)	0.000250491	0.95 (0.01)	0.000397833	0.94 (0.02)	0.000418651
KRT5	P308	0.000131131	0.85 (0.03)	-6.5e-06	0.9 (0.04)	0.00016258	0.87 (0.05)	0.000214371	0.49 (0.35)	0.000114	0.84 (0.03)	6.28246e-05	0.73 (0.1)	0.000211348	0.82 (0.05)	0.000187667	0.74 (0.06)	8.15405e-05	0.8 (0.04)	0.000362438	0.87 (0.01)	0.000467167	0.81 (0.05)	5.86126e-05
LAMB1	E144	0.00094995	0.2 (0.03)	0.000139833	0.05 (0.01)	0.00158971	0.06 (0.06)	0.00116738	0.16 (0.03)	0.000102	0.2 (0.04)	0.00046307	0.08 (0.03)	0.00118436	0.18 (0.05)	0.000303633	0.29 (0.07)	0.000324282	0.25 (0.06)	0.00273858	0.2 (0.03)	0.0003	0.19 (0.04)	0.00085216
LAMC1	E466	0.000112142	0.03 (0.01)	7.16667e-05	0.01 (0)	0.000158275	0.02 (0.01)	0.000259974	0.04 (0.03)	-1.2e-05	0.03 (0.01)	1.33398e-05	0.02 (0.01)	8.00619e-05	0.03 (0.01)	-6.63333e-06	0.04 (0.02)	1.18639e-05	0.04 (0.02)	-6.391e-05	0.03 (0.01)	5.56667e-05	0.03 (0.01)	0.000279102
LAMC1	P808	5.46811e-05	0.1 (0.02)	-1.5e-05	0.06 (0.05)	1.8645e-05	0.06 (0.03)	3.7181e-05	0.08 (0.01)	6.1e-05	0.06 (0.02)	2.31862e-05	0.06 (0.01)	0.000349781	0.1 (0.01)	0.000136367	0.11 (0.02)	5.20079e-05	0.1 (0.02)	7.1549e-05	0.09 (0.01)	4.7e-05	0.09 (0.02)	3.8502e-05
LAT	E46	0.00666207	0.66 (0.09)	0.00130167	0.04 (0.01)	0.0118583	0.84 (0.05)	0.00515954	0.66 (0.29)	0.000588	0.08 (0.03)	0.0086715	0.78 (0.1)	0.00495248	0.79 (0.05)	0.00287087	0.83 (0.08)	0.00624177	0.7 (0.07)	0.00327617	0.74 (0.09)	0.001243	0.7 (0.08)	0.005616
LCK	E28	0.00171925	0.9 (0.02)	0.000481833	0.88 (0.03)	0.000227603	0.96 (0.01)	0.00313458	0.9 (0.07)	-0.000138	0.82 (0.03)	0.00443121	0.92 (0.03)	0.000582703	0.91 (0.02)	0.000750067	0.91 (0.04)	0.00131594	0.92 (0.02)	0.000946551	0.92 (0.01)	0.0003505	0.91 (0.03)	0.000729277
LCN2	P141	0.000146388	0.91 (0.02)	9.26667e-05	0.82 (0.06)	2.64443e-05	0.95 (0.02)	0.00196823	0.68 (0.13)	0.000142	0.85 (0.05)	7.97227e-06	0.8 (0.09)	0.000316436	0.87 (0.04)	9.84e-05	0.9 (0.04)	3.1158e-06	0.9 (0.07)	1.09778e-05	0.86 (0.04)	3.65e-05	0.9 (0.03)	3.72652e-05
LCN2	P86	7.09444e-05	0.8 (0.09)	0.0002705	0.72 (0.09)	5.06614e-06	0.86 (0.09)	0.000616113	0.37 (0.43)	8.3e-05	0.72 (0.08)	1.13426e-05	0.61 (0.16)	0.000125893	0.68 (0.14)	0.0001262	0.85 (0.07)	4.50761e-05	0.79 (0.1)	-5.0634e-06	0.69 (0.1)	6.63333e-05	0.79 (0.07)	3.31886e-05
LEFTY2	P561	2.25624e-05	0.38 (0.14)	8.85e-05	0.64 (0.07)	3.11125e-05	0.53 (0.13)	-1.19841e-06	0.42 (0.25)	-5.4e-05	0.66 (0.08)	2.20979e-05	0.45 (0.08)	2.61802e-05	0.36 (0.06)	0.0002199	0.65 (0.11)	1.30805e-05	0.49 (0.11)	1.1759e-06	0.52 (0.13)	-1.98333e-05	0.48 (0.1)	1.40518e-05
LEFTY2	P719	0.000388402	0.77 (0.11)	0.0003415	0.93 (0.02)	4.80713e-05	0.86 (0.05)	0.000608137	0.91 (0.05)	5.8e-05	0.93 (0.02)	8.67409e-05	0.86 (0.04)	0.000593025	0.83 (0.03)	0.000470367	0.94 (0.01)	0.00181501	0.84 (0.05)	0.000417152	0.87 (0.03)	0.000170333	0.84 (0.06)	0.000330372
LIF	E208	8.82172e-05	0.04 (0.01)	7.68333e-05	0.02 (0)	0.000242826	0.03 (0.01)	-3.05476e-06	0.04 (0.01)	1.3e-05	0.03 (0.01)	1.02224e-05	0.03 (0)	0.000557692	0.04 (0.01)	9.85667e-05	0.04 (0.01)	1.95939e-05	0.04 (0.01)	5.11755e-05	0.04 (0.01)	3.5e-05	0.04 (0.01)	5.52965e-05
LIF	P383	0.000223293	0.49 (0.08)	0.000206667	0.37 (0.09)	1.29584e-05	0.57 (0.08)	0.000485893	0.22 (0.29)	-3.7e-05	0.37 (0.1)	1.21998e-05	0.41 (0.08)	0.000138878	0.33 (0.11)	0.000267467	0.71 (0.09)	0.00147082	0.43 (0.08)	6.17864e-05	0.45 (0.17)	-1.6e-05	0.4 (0.08)	0.000147166
LIG3	P622	0.00119786	0.68 (0.05)	0.000353	0.84 (0.05)	0.000498613	0.4 (0.1)	0.00225418	0.61 (0.1)	7.2e-05	0.86 (0.02)	0.00197218	0.45 (0.16)	0.00139551	0.59 (0.09)	0.000621633	0.31 (0.12)	0.00181276	0.71 (0.08)	0.000308884	0.69 (0.06)	0.0002865	0.66 (0.08)	0.000892463
LIG4	P194	0.00121204	0.04 (0.01)	-3.3e-05	0.02 (0)	0.00412364	0.02 (0.01)	0.000954463	0.04 (0)	0.000138	0.04 (0.03)	0.000795002	0.03 (0)	0.00174285	0.05 (0.01)	0.0004437	0.06 (0.03)	0.000245209	0.05 (0.01)	0.000662558	0.04 (0.01)	-2.71667e-05	0.05 (0.01)	0.000916769
LIMK1	P709	0.000374853	0.83 (0.06)	0.000344667	0.95 (0.01)	0.000244728	0.65 (0.08)	0.0035468	0.87 (0)	0.000204	0.94 (0.02)	5.43043e-05	0.81 (0.06)	0.000649701	0.81 (0.06)	0.00102347	0.93 (0.03)	0.000248643	0.9 (0.03)	7.72156e-05	0.91 (0.02)	0.000132667	0.89 (0.03)	0.000132651
LMO1	E265	2.72604e-05	0.14 (0.02)	-7.5e-06	0.08 (0.05)	1.45288e-06	0.06 (0.03)	0.000248505	0.1 (0.08)	-1.4e-05	0.12 (0.06)	2.35848e-07	0.09 (0.05)	1.50492e-05	0.12 (0.05)	-2.38333e-05	0.23 (0.12)	1.29804e-05	0.16 (0.05)	6.90357e-05	0.13 (0.04)	-2.98333e-05	0.15 (0.04)	2.54486e-05
LMO1	P169	9.31145e-05	0.03 (0.01)	-2.3e-05	0.02 (0)	0.000135094	0.03 (0)	0.000499154	0.03 (0)	1.4e-05	0.04 (0.03)	-7.08844e-07	0.03 (0)	0.000472407	0.03 (0.01)	3.56e-05	0.03 (0.01)	-1.34574e-06	0.04 (0.01)	3.52246e-05	0.03 (0.01)	-8.96667e-05	0.04 (0.01)	0.000103332
LMO2	E148	0.00470743	0.9 (0.04)	0.00108683	0.45 (0.12)	0.00543362	0.92 (0.05)	0.00374817	0.93 (0.04)	0.00047	0.29 (0.08)	0.00782706	0.91 (0.1)	0.00208187	0.94 (0.01)	0.00237837	0.93 (0.06)	0.0045893	0.91 (0.05)	0.00235159	0.89 (0.05)	0.00106517	0.9 (0.05)	0.00415073
LMO2	P794	0.00309253	0.86 (0.05)	0.000729667	0.44 (0.13)	0.00350243	0.93 (0.03)	0.00252901	0.85 (0.03)	0.000399	0.27 (0.11)	0.00505018	0.91 (0.09)	0.0018672	0.91 (0.02)	0.00151393	0.96 (0.02)	0.00322586	0.85 (0.14)	0.000464756	0.87 (0.04)	0.000608667	0.9 (0.04)	0.00298677
LMTK2	P1034	5.93795e-05	0.66 (0.05)	4.35e-05	0.65 (0.04)	5.69792e-05	0.68 (0.09)	3.56881e-05	0.7 (0.16)	-3e-06	0.52 (0.08)	0.000104477	0.68 (0.03)	0.000107035	0.57 (0.07)	-2.33333e-06	0.56 (0.1)	1.60289e-06	0.59 (0.05)	-7.70206e-06	0.55 (0.12)	3.2e-05	0.61 (0.07)	6.17955e-05
LOX	P313	2.34224e-05	0.15 (0.06)	-8.33333e-07	0.1 (0.04)	5.3688e-06	0.13 (0.07)	5.33413e-06	0.1 (0.09)	1e-05	0.1 (0.04)	5.88791e-06	0.15 (0.09)	-6.9373e-06	0.16 (0.03)	2.88333e-05	0.16 (0.1)	1.55411e-06	0.18 (0.06)	-2.97058e-05	0.15 (0.07)	1e-06	0.18 (0.06)	9.16931e-05
LOX	P71	3.56905e-05	0.06 (0.03)	-7.31667e-05	0.04 (0.01)	2.89078e-05	0.04 (0.01)	7.45e-05	0.03 (0)	0.000103	0.07 (0.03)	-1.15618e-06	0.06 (0.04)	-3.00238e-06	0.06 (0.01)	3.03e-05	0.07 (0.06)	6.55267e-07	0.07 (0.02)	8.66816e-05	0.07 (0.02)	1e-06	0.06 (0.02)	7.90552e-05
LRP2	E20	0.000116349	0.06 (0.01)	0.000124	0.03 (0)	0.000105902	0.03 (0.01)	3.56389e-05	0.06 (0.01)	0.00011	0.03 (0.01)	9.61906e-05	0.04 (0)	0.000125548	0.05 (0.01)	5.58333e-05	0.06 (0.02)	1.76088e-05	0.05 (0.01)	-7.82089e-05	0.05 (0.01)	-4.35e-05	0.05 (0.01)	0.000281595
LRRC32	E157	4.32529e-05	0.94 (0.01)	0.000123	0.95 (0.01)	1.64888e-05	0.93 (0.02)	2.36587e-06	0.95 (0.01)	1.5e-05	0.95 (0.02)	1.61996e-06	0.91 (0.03)	0.000575241	0.94 (0.01)	8.50333e-05	0.96 (0.02)	1.24709e-05	0.95 (0.01)	-1.3328e-05	0.95 (0.01)	4.3e-05	0.95 (0.01)	9.51723e-06
LRRC32	P865	0.000208427	0.04 (0.01)	-3.55e-05	0.02 (0)	9.4713e-05	0.02 (0.01)	0.000260205	0.04 (0.01)	-2.9e-05	0.03 (0.01)	1.18312e-05	0.02 (0)	0.000715188	0.05 (0.01)	0.000110267	0.06 (0.03)	2.47024e-05	0.05 (0.01)	0.000738856	0.04 (0.01)	3.33333e-07	0.04 (0.01)	0.000304644
LRRK1	P39	0.000147084	0.94 (0.01)	8.5e-05	0.91 (0.01)	7.4009e-05	0.92 (0.02)	-0.000148075	0.95 (0)	0.000185	0.92 (0.02)	1.28155e-06	0.9 (0.01)	0.00226137	0.94 (0.01)	0.000148933	0.94 (0.03)	2.07919e-05	0.94 (0.02)	-1.87733e-05	0.95 (0.01)	0.0001015	0.94 (0.01)	0.000101681
LRRK1	P834	0.000142958	0.63 (0.06)	2.26667e-05	0.64 (0.05)	6.77531e-06	0.65 (0.05)	-4.83667e-05	0.43 (0.43)	-3.5e-05	0.69 (0.06)	2.70808e-06	0.54 (0.06)	0.00236468	0.68 (0.03)	0.000147533	0.69 (0.1)	-6.87734e-07	0.72 (0.03)	0.000213001	0.71 (0.02)	8.16667e-05	0.71 (0.05)	6.32285e-05
LTA	E28	0.000209118	0.85 (0.1)	-4.73333e-05	0.73 (0.14)	1.74297e-05	0.91 (0.04)	0.000915698	0.58 (0.15)	0.000175	0.68 (0.12)	0.000185183	0.62 (0.19)	0.00127571	0.89 (0.04)	0.000167233	0.91 (0.03)	0.000108361	0.9 (0.04)	0.000383573	0.84 (0.09)	-0.000105333	0.86 (0.09)	4.54846e-05
LTA	P214	0.00596284	0.88 (0.04)	0.0010335	0.81 (0.06)	0.000845237	0.93 (0.02)	0.00438495	0.83 (0.05)	0.000484	0.62 (0.08)	0.0156038	0.88 (0.06)	0.0010903	0.89 (0.03)	0.00204773	0.9 (0.06)	0.00354112	0.91 (0.03)	0.00258022	0.91 (0.01)	0.00109683	0.9 (0.03)	0.00432051
LTB4R	E64	0.00686205	0.82 (0.06)	0.0012545	0.19 (0.03)	0.0104161	0.91 (0.05)	0.00723774	0.86 (0.1)	0.00072	0.18 (0.04)	0.00866872	0.86 (0.1)	0.00570987	0.85 (0.05)	0.00252857	0.9 (0.05)	0.00745163	0.81 (0.05)	0.00322606	0.79 (0.09)	0.00114333	0.75 (0.06)	0.00621928
LTB4R	P163	0.00661734	0.89 (0.04)	0.00134683	0.3 (0.08)	0.0103075	0.93 (0.02)	0.00599678	0.91 (0.08)	0.000727	0.33 (0.1)	0.00869299	0.87 (0.06)	0.0048143	0.91 (0.02)	0.00302323	0.94 (0.02)	0.00707781	0.86 (0.05)	0.00314895	0.88 (0.06)	0.0011815	0.84 (0.04)	0.00583137
LY6G6E	P45	0.00261678	0.69 (0.11)	0.000833333	0.96 (0.01)	0.0062854	0.57 (0.12)	0.00373429	0.39 (0.32)	0.000469	0.92 (0.02)	0.00115167	0.52 (0.2)	0.00316639	0.62 (0.13)	0.0023857	0.6 (0.11)	0.00380258	0.8 (0.06)	0.000859802	0.63 (0.2)	0.000800833	0.8 (0.07)	0.00233635
LYN	E353	4.1312e-05	0.13 (0.09)	-4.83333e-05	0.13 (0.07)	9.40334e-06	0.14 (0.06)	-1.91825e-06	0.05 (0.01)	0.000233	0.15 (0.07)	1.32183e-06	0.13 (0.04)	3.06706e-05	0.12 (0.04)	3.12667e-05	0.17 (0.11)	-2.86779e-06	0.21 (0.07)	0.000344629	0.17 (0.07)	2.16667e-05	0.15 (0.04)	3.69357e-05
LYN	P241	6.71663e-05	0.08 (0.01)	6.03333e-05	0.04 (0.01)	0.000268841	0.08 (0.03)	1.83516e-05	0.08 (0.06)	-4.6e-05	0.06 (0.02)	7.95083e-06	0.06 (0.02)	3.96603e-05	0.1 (0.03)	0.0001493	0.09 (0.03)	1.43235e-05	0.1 (0.04)	7.41707e-05	0.07 (0.01)	-2.63333e-05	0.07 (0.02)	5.60818e-05
MAD2L1	E93	0.000128752	0.76 (0.03)	-7.93333e-05	0.81 (0.02)	0.000133991	0.69 (0.03)	0.00147362	0.75 (0.09)	-8.9e-05	0.76 (0.03)	8.86836e-06	0.79 (0.02)	0.00057977	0.69 (0.08)	0.000210833	0.73 (0.08)	6.28872e-06	0.75 (0.02)	2.19563e-05	0.76 (0.03)	-6.13333e-05	0.76 (0.04)	4.82976e-06
MAF	E77	6.71405e-05	0.1 (0.03)	1.2e-05	0.05 (0.03)	3.81948e-05	0.05 (0.04)	0.000139385	0.04 (0)	0.000178	0.12 (0.05)	9.26655e-06	0.05 (0.02)	0.000161114	0.14 (0.05)	1.33667e-05	0.15 (0.07)	7.04321e-06	0.15 (0.05)	6.98582e-05	0.11 (0.04)	-3.21667e-05	0.14 (0.04)	0.000131066
MAF	P826	9.96434e-05	0.07 (0.05)	2.31667e-05	0.02 (0.01)	2.51321e-05	0.02 (0.01)	0.00129399	0.03 (0.01)	3.2e-05	0.06 (0.07)	3.27192e-06	0.06 (0.06)	0.000196279	0.06 (0.04)	8.72667e-05	0.23 (0.27)	2.95867e-05	0.06 (0.03)	5.12854e-05	0.05 (0.03)	2.6e-05	0.05 (0.02)	2.00429e-05
MAGEL2	E166	0.000109538	0.9 (0.03)	-8.23333e-05	0.88 (0.01)	3.5629e-05	0.88 (0.03)	3.13262e-05	0.9 (0.05)	-8e-05	0.89 (0.04)	3.12437e-06	0.87 (0.01)	0.000480138	0.91 (0.01)	8.33e-05	0.87 (0.07)	2.32386e-06	0.91 (0.03)	4.26059e-05	0.91 (0.01)	4.63333e-05	0.92 (0.02)	0.000306669
MAGEL2	P170	3.18933e-05	0.9 (0.01)	1.13333e-05	0.93 (0.01)	6.95634e-05	0.92 (0.01)	1.32262e-05	0.91 (0.03)	-3e-05	0.89 (0.03)	2.92796e-05	0.9 (0.02)	1.86944e-05	0.91 (0.02)	-2.14333e-05	0.86 (0.05)	7.61152e-05	0.91 (0.03)	-1.1813e-05	0.92 (0.01)	0.000124	0.92 (0.02)	1.86437e-05
MALT1	P406	0.000183043	0.08 (0.03)	-3e-05	0.03 (0.01)	6.85524e-05	0.04 (0.04)	9.13881e-05	0.03 (0)	0.00016	0.11 (0.05)	1.51602e-05	0.04 (0.02)	0.000176915	0.1 (0.03)	5.04333e-05	0.08 (0.07)	5.48287e-06	0.1 (0.04)	-0.000139034	0.1 (0.04)	-8.48333e-05	0.1 (0.02)	0.000679778
MAP2K6	E297	1.31203e-05	0.1 (0.06)	-4.31667e-05	0.04 (0.01)	3.97562e-05	0.05 (0.04)	2.01639e-05	0.16 (0.23)	5e-06	0.11 (0.06)	1.63244e-06	0.04 (0.01)	7.50762e-05	0.19 (0.16)	-7.76667e-06	0.14 (0.11)	6.32612e-07	0.1 (0.08)	-3.15459e-05	0.15 (0.03)	7.61667e-05	0.13 (0.08)	1.43398e-05
MAP2K6	P297	9.68043e-05	0.13 (0.03)	2.53333e-05	0.15 (0.04)	7.64664e-06	0.11 (0.03)	7.09643e-05	0.13 (0.08)	-3e-05	0.22 (0.04)	0.000257827	0.12 (0.03)	4.58079e-05	0.12 (0.03)	6.36e-05	0.1 (0.03)	0.000126866	0.17 (0.03)	6.9683e-05	0.14 (0.03)	1.73333e-05	0.16 (0.04)	1.96551e-05
MAP3K1	E81	9.78389e-05	0.21 (0.07)	7.4e-05	0.04 (0.02)	0.000139501	0.2 (0.23)	-4.21929e-05	0.1 (0.07)	-3.5e-05	0.12 (0.05)	3.47956e-05	0.06 (0.03)	0.000732501	0.17 (0.09)	-6.84e-05	0.17 (0.09)	-1.87383e-06	0.33 (0.17)	0.000359902	0.25 (0.1)	0.000131667	0.22 (0.09)	2.38002e-05
MAP3K1	P7	0.000273884	0.23 (0.06)	-0.000124667	0.06 (0.01)	0.000277048	0.15 (0.05)	0.000105288	0.14 (0.06)	3.3e-05	0.07 (0.02)	0.000178525	0.17 (0.07)	-8.90952e-06	0.16 (0.05)	-4.53333e-05	0.1 (0.03)	4.56726e-05	0.33 (0.17)	0.00177147	0.26 (0.14)	0.000471833	0.18 (0.04)	0.000149646
MAP3K8	P1036	0.000155648	0.7 (0.06)	-7.5e-06	0.76 (0.07)	4.42029e-05	0.78 (0.08)	4.53405e-05	0.57 (0.14)	1.1e-05	0.84 (0.06)	0.000112523	0.56 (0.15)	8.99095e-05	0.71 (0.08)	-3.71333e-05	0.74 (0.14)	8.0239e-06	0.69 (0.15)	-5.75146e-05	0.65 (0.16)	-1.81667e-05	0.59 (0.12)	0.000502526
MAP3K9	E17	4.74837e-05	0.08 (0.01)	6.98333e-05	0.04 (0.02)	2.73062e-05	0.06 (0.07)	1.60778e-05	0.12 (0.12)	-3e-05	0.08 (0.04)	2.03562e-06	0.04 (0.01)	0.000423372	0.12 (0.08)	1.99333e-05	0.08 (0.03)	7.06994e-06	0.1 (0.04)	1.98519e-05	0.08 (0.02)	-4.83333e-06	0.1 (0.07)	5.6421e-05
MAPK10	E26	0.000382033	0.56 (0.15)	0.00137967	0.92 (0.01)	0.000167878	0.7 (0.11)	0.000518911	0.28 (0.27)	0.000675	0.89 (0.02)	0.000123336	0.73 (0.2)	-3.93794e-05	0.37 (0.05)	0.00354347	0.8 (0.1)	3.07653e-05	0.84 (0.05)	-1.5682e-05	0.76 (0.07)	0.000370667	0.86 (0.04)	0.000641318
MAPK12	E165	0.000198452	0.04 (0)	0.000269167	0.03 (0.01)	3.26014e-05	0.03 (0.01)	0.000269608	0.05 (0.03)	-8.3e-05	0.03 (0.01)	4.35545e-05	0.04 (0.01)	2.1604e-05	0.04 (0.01)	-3.83e-05	0.08 (0.04)	2.98551e-05	0.07 (0.02)	0.000833649	0.05 (0.02)	2.76667e-05	0.05 (0.01)	0.000379378
MAPK12	P416	0.000132509	0.09 (0.05)	-0.000116833	0.04 (0.01)	5.61285e-05	0.17 (0.09)	9.70778e-05	0.1 (0.12)	-9e-05	0.06 (0.03)	7.28325e-06	0.11 (0.05)	3.37619e-05	0.25 (0.09)	0.0013556	0.12 (0.08)	-7.56718e-06	0.1 (0.04)	0.00010673	0.06 (0.02)	2.01667e-05	0.08 (0.02)	0.000308007
MAPK14	P327	7.91677e-05	0.21 (0.07)	2.91667e-05	0.07 (0.02)	0.000240505	0.2 (0.07)	4.89151e-05	0.16 (0.21)	-3.9e-05	0.11 (0.05)	3.94931e-06	0.22 (0.07)	0.000111237	0.14 (0.06)	-7.46e-05	0.1 (0.07)	1.5378e-05	0.23 (0.08)	0.000177017	0.13 (0.03)	6.66667e-06	0.18 (0.05)	8.80082e-05
MAPK4	E273	0.000115016	0.85 (0.02)	-7.25e-05	0.86 (0.03)	6.87049e-06	0.79 (0.1)	0.00015563	0.67 (0.1)	0.00025	0.87 (0.02)	2.49517e-05	0.8 (0.04)	0.000158314	0.82 (0.04)	8.39333e-05	0.9 (0.04)	0.000522038	0.82 (0.04)	0.000209876	0.89 (0.02)	0.000135333	0.83 (0.03)	6.26219e-05
MAPK9	P1175	7.98337e-05	0.92 (0.01)	0.000539	0.95 (0)	0.00026661	0.93 (0.01)	2.67302e-05	0.94 (0.01)	-2e-05	0.93 (0.02)	3.07994e-05	0.92 (0.01)	4.67405e-05	0.91 (0.01)	0.0003022	0.93 (0.03)	-2.15505e-06	0.94 (0.01)	8.3302e-05	0.93 (0)	0.000169833	0.93 (0.01)	9.25272e-06
MAS1	P469	0.000427356	0.89 (0.02)	0.000264167	0.96 (0.01)	0.00190169	0.95 (0.02)	0.000168708	0.87 (0.05)	3.2e-05	0.92 (0.02)	0.000398732	0.92 (0.02)	3.70595e-05	0.91 (0.02)	-2e-06	0.89 (0.03)	5.36812e-05	0.93 (0.02)	2.00165e-05	0.85 (0.11)	0.0001425	0.92 (0.02)	0.000140561
MAS1	P657	0.000410815	0.93 (0.02)	5.86667e-05	0.97 (0)	0.00190616	0.95 (0.02)	4.24929e-05	0.94 (0.02)	1.9e-05	0.92 (0.02)	0.000358738	0.96 (0.01)	0.000231595	0.93 (0.02)	0.0001404	0.94 (0.02)	6.00245e-05	0.93 (0.02)	9.02778e-06	0.88 (0.11)	0.0001105	0.94 (0.01)	0.000136969
MATK	P190	0.000593517	0.47 (0.11)	-6.88333e-05	0.13 (0.05)	0.00168609	0.36 (0.18)	2.43611e-05	0.26 (0.26)	2.6e-05	0.42 (0.07)	0.00052407	0.19 (0.07)	0.000814175	0.37 (0.15)	-0.000148333	0.6 (0.12)	0.000119694	0.58 (0.09)	0.00159057	0.48 (0.08)	5.5e-06	0.44 (0.08)	0.000225628
MATK	P64	0.000153704	0.06 (0.03)	-3.1e-05	0.04 (0.02)	9.2197e-07	0.02 (0.01)	0.00109134	0.07 (0.07)	-4.5e-05	0.03 (0.01)	0.000104173	0.05 (0.03)	-2.48135e-05	0.05 (0.02)	7.95333e-05	0.17 (0.11)	0.000176183	0.07 (0.04)	0.000162258	0.06 (0.04)	-6.03333e-05	0.06 (0.02)	0.000167473
MBD2	P233	3.89575e-05	0.65 (0.08)	-5.56667e-05	0.65 (0.09)	-2.78328e-06	0.6 (0.05)	0.000117637	0.58 (0.07)	3.6e-05	0.68 (0.05)	6.03571e-06	0.63 (0.05)	5.89524e-06	0.65 (0.07)	-1.79667e-05	0.79 (0.07)	0.000243004	0.69 (0.05)	2.0789e-05	0.65 (0.07)	-7e-06	0.65 (0.1)	2.39709e-05
MC2R	E455	4.93946e-05	0.94 (0.01)	-4.98333e-05	0.93 (0.01)	2.85355e-05	0.92 (0.03)	-1.67778e-06	0.95 (0)	0.00013	0.93 (0.02)	2.80827e-06	0.92 (0.01)	0.000433499	0.94 (0.01)	-2.62333e-05	0.9 (0.07)	1.95268e-05	0.94 (0.04)	1.36353e-05	0.95 (0)	0.0002505	0.95 (0.01)	5.61113e-05
MC2R	P1025	0.000695535	0.38 (0.09)	0.000212667	0.71 (0.11)	0.000486531	0.45 (0.08)	0.000551074	0.28 (0.29)	-3.7e-05	0.75 (0.09)	0.00112207	0.28 (0.1)	0.00079657	0.47 (0.12)	0.000245867	0.24 (0.09)	0.000813149	0.39 (0.12)	0.000210298	0.55 (0.04)	0.0003345	0.38 (0.09)	0.000683641
MCAM	P169	0.000111154	0.06 (0.03)	-7.75e-05	0.05 (0.02)	1.10476e-06	0.03 (0.01)	0.000181308	0.04 (0.01)	4.7e-05	0.05 (0.02)	3.63399e-06	0.04 (0.02)	0.000118667	0.07 (0.03)	-3.99333e-05	0.08 (0.03)	2.38056e-06	0.08 (0.02)	0.000176891	0.06 (0.02)	-5.56667e-05	0.08 (0.05)	0.000337107
MCAM	P265	3.13791e-05	0.19 (0.04)	1e-06	0.12 (0.06)	1.55376e-05	0.13 (0.05)	2.8096e-05	0.16 (0.19)	3.8e-05	0.16 (0.04)	1.12894e-05	0.1 (0.03)	0.00017479	0.22 (0.1)	-5.89333e-05	0.27 (0.09)	2.41256e-05	0.25 (0.06)	0.00011117	0.26 (0.07)	-7e-06	0.21 (0.05)	1.957e-05
MCC	E23	0.000102326	0.07 (0.03)	-7.96667e-05	0.05 (0.01)	2.16277e-05	0.04 (0.02)	0.000224563	0.1 (0.06)	-5.4e-05	0.07 (0.03)	1.47757e-06	0.05 (0.01)	0.00044389	0.07 (0.02)	-0.000167133	0.1 (0.05)	5.84131e-06	0.1 (0.02)	0.000635827	0.08 (0.02)	-6.4e-05	0.08 (0.02)	8.4796e-05
MCC	P196	0.00122401	0.02 (0.01)	0.000244833	0.05 (0.01)	0.00328478	0.04 (0.01)	0.000101847	0.03 (0.01)	0.000159	0.02 (0.01)	0.000953075	0.06 (0.01)	0.00719355	0.03 (0.01)	0.0004864	0.03 (0.04)	2.14207e-05	0.02 (0.01)	0.000145256	0.02 (0.01)	0.0001765	0.02 (0.01)	0.000671894
MCM2	P241	0.000130859	0.08 (0.03)	7.43333e-05	0.03 (0)	0.000230084	0.03 (0.01)	9.81579e-05	0.08 (0.09)	-7.3e-05	0.05 (0.02)	2.2328e-06	0.03 (0.01)	0.000428332	0.06 (0.02)	-4.65e-05	0.08 (0.03)	8.41409e-06	0.08 (0.03)	0.000494154	0.06 (0.01)	6.18333e-05	0.06 (0.01)	0.000117077
MCM2	P260	0.000311664	0.32 (0.05)	0.000141833	0.12 (0.05)	0.000241775	0.13 (0.08)	0.000483489	0.38 (0.18)	-8.1e-05	0.27 (0.06)	0.000150809	0.12 (0.02)	0.00208934	0.27 (0.09)	-0.0001734	0.41 (0.12)	6.38199e-05	0.34 (0.06)	0.000175254	0.35 (0.05)	0.0001185	0.33 (0.05)	0.000363317
MCM6	E136	9.16877e-05	0.1 (0.03)	3.85e-05	0.03 (0.01)	6.56746e-05	0.04 (0.02)	0.000147706	0.12 (0.14)	6e-06	0.08 (0.03)	1.0829e-05	0.04 (0.01)	0.000523926	0.08 (0.03)	6.45667e-05	0.12 (0.07)	9.00447e-06	0.09 (0.03)	6.53778e-06	0.1 (0.02)	5.18333e-05	0.09 (0.03)	0.00015733
MDR1	S300	0.000139106	0.05 (0.02)	2e-06	0.02 (0.01)	0.000205861	0.05 (0.06)	5.54127e-06	0.03 (0)	4.9e-05	0.03 (0.01)	4.54258e-05	0.09 (0.1)	-2.33794e-05	0.06 (0.03)	7.13333e-06	0.08 (0.08)	4.65723e-05	0.08 (0.1)	8.75515e-05	0.04 (0.01)	-5.23333e-05	0.05 (0.01)	0.000359309
MDS1	E45	0.000179741	0.08 (0.02)	5e-07	0.09 (0.01)	0.000164132	0.12 (0.03)	0.000905194	0.04 (0.01)	0.00012	0.05 (0.03)	1.25646e-05	0.09 (0.04)	0.000114305	0.06 (0.02)	-5.03e-05	0.07 (0.05)	4.9385e-06	0.05 (0.01)	-7.02318e-05	0.06 (0.02)	-7.26667e-05	0.05 (0.01)	0.000430638
MEG3	E91	3.09869e-05	0.5 (0.04)	-1.33333e-05	0.42 (0.1)	9.78247e-06	0.47 (0.07)	3.85476e-06	0.49 (0.08)	-4.7e-05	0.47 (0.07)	4.91018e-06	0.51 (0.04)	2.85738e-05	0.53 (0.07)	6.66667e-08	0.54 (0.14)	5.85269e-06	0.45 (0.08)	4.94113e-05	0.57 (0.06)	0.000136	0.47 (0.08)	8.415e-05
MEG3	P235	3.48173e-05	0.86 (0.02)	-7.33333e-06	0.84 (0.02)	1.5831e-05	0.81 (0.06)	8.4654e-05	0.86 (0.07)	-5e-05	0.85 (0.04)	6.49483e-06	0.84 (0.01)	9.60571e-05	0.85 (0.04)	-5.62667e-05	0.77 (0.1)	1.50548e-05	0.89 (0.04)	0.000139713	0.89 (0.02)	8.4e-05	0.88 (0.03)	3.45017e-05
MEST	E150	0.00157175	0.39 (0.04)	0.000832667	0.05 (0.02)	0.00247958	0.31 (0.12)	0.00130949	0.17 (0.18)	-0.000134	0.06 (0.02)	0.00198363	0.21 (0.09)	0.000612348	0.55 (0.06)	0.0041048	0.5 (0.16)	0.00173253	0.36 (0.16)	0.000731671	0.25 (0.11)	0.0001895	0.24 (0.07)	0.00123317
MEST	P4	0.00281473	0.64 (0.1)	0.0009765	0.05 (0.03)	0.00407752	0.52 (0.16)	0.00219151	0.16 (0.14)	0.000218	0.06 (0.04)	0.00351976	0.3 (0.14)	0.000847739	0.86 (0.03)	0.00529127	0.79 (0.11)	0.00299084	0.57 (0.17)	0.00144278	0.52 (0.23)	0.000722	0.43 (0.1)	0.0027322
MEST	P62	0.00302191	0.52 (0.04)	0.002462	0.07 (0.03)	0.00369268	0.44 (0.13)	0.0021576	0.24 (0.19)	-0.000457	0.07 (0.04)	0.00323902	0.32 (0.12)	0.00190191	0.75 (0.04)	0.00650137	0.65 (0.11)	0.00369078	0.46 (0.16)	0.00156736	0.36 (0.18)	0.000257333	0.29 (0.08)	0.00337517
MET	E333	0.000120403	0.29 (0.17)	-0.0001015	0.51 (0.17)	0.000120028	0.1 (0.03)	0.00051693	0.09 (0.09)	1.5e-05	0.23 (0.08)	2.2177e-05	0.17 (0.09)	0.0001162	0.16 (0.06)	4.91667e-05	0.09 (0.05)	0.000206907	0.28 (0.06)	0.000473212	0.34 (0.16)	0.000103333	0.26 (0.1)	2.01001e-05
			Bladder (n=5)		Blood (n=30)		Brain (n=12)		Cervix (n=3)		Infant blood (n=55)		Head and neck (n=11)		Kidney (n=6)		Placenta (n=19)		Pleura (n=18)		Small intestine (n=5)		Lung (n=53)
GENE	CpG	Mean decrease in accuracy	Mean (sd)	Decrease in accuracy	Mean (sd)	Decrease in accuracy	Mean (sd)	Decrease in accuracy	Mean (sd)	Decrease in accuracy	Mean (sd)	Decrease in accuracy	Mean (sd)	Decrease in accuracy	Mean (sd)	Decrease in accuracy	Mean (sd)	Decrease in accuracy	Mean (sd)	Decrease in accuracy	Mean (sd)	Decrease in accuracy	Mean (sd)	Decrease in accuracy
MFAP4	P10	0.000605638	0.32 (0.07)	-1.33333e-06	0.18 (0.03)	9.7359e-05	0.24 (0.08)	0.000325599	0.25 (0.07)	3.8e-05	0.24 (0.04)	8.75697e-05	0.33 (0.12)	-0.000126933	0.34 (0.05)	0.000212667	0.69 (0.08)	0.00529408	0.35 (0.06)	0.000243559	0.41 (0.14)	-0.000143667	0.31 (0.05)	0.000370778
MFAP4	P197	0.000859299	0.4 (0.05)	0.000595	0.26 (0.06)	7.98172e-05	0.2 (0.08)	0.00346887	0.48 (0.12)	0.000186	0.18 (0.07)	0.000449923	0.57 (0.22)	0.0014834	0.4 (0.09)	0.0010768	0.88 (0.04)	0.00327695	0.43 (0.07)	0.000509872	0.49 (0.19)	0.000124167	0.46 (0.08)	0.000417434
MGMT	P272	0.00163413	0.11 (0.04)	0.000350833	0.02 (0)	0.00425344	0.03 (0.01)	0.00512679	0.16 (0.12)	-0.000211	0.12 (0.04)	0.00107492	0.04 (0.01)	0.00231408	0.1 (0.05)	-5.14e-05	0.18 (0.07)	0.000283187	0.14 (0.04)	0.00144665	0.11 (0.02)	0.000395	0.1 (0.03)	0.00100229
MGMT	P281	5.70597e-05	0.05 (0.01)	-2e-05	0.03 (0)	0.000147317	0.03 (0.01)	9.06159e-05	0.04 (0)	1.8e-05	0.04 (0.01)	5.74088e-06	0.04 (0.01)	1.25524e-05	0.05 (0.02)	-6.93333e-06	0.06 (0.03)	3.40968e-06	0.06 (0.02)	6.43399e-05	0.05 (0.01)	-1.31667e-05	0.05 (0.01)	9.88396e-05
MKRN3	E144	0.000302712	0.94 (0.01)	0.000455667	0.96 (0.01)	6.46719e-05	0.86 (0.05)	0.000732813	0.87 (0.14)	-0.000129	0.94 (0.02)	7.10464e-05	0.91 (0.03)	0.000488847	0.95 (0.01)	0.000126733	0.45 (0.25)	0.00137311	0.94 (0.07)	0.000109309	0.95 (0)	0.0001075	0.96 (0.02)	0.000231931
MKRN3	P108	0.000630304	0.9 (0.01)	0.000524333	0.95 (0.01)	0.000982724	0.82 (0.05)	0.00146441	0.81 (0.06)	0.000294	0.91 (0.03)	0.000350649	0.89 (0.02)	0.000597563	0.91 (0.02)	-9.03333e-05	0.49 (0.25)	0.00163134	0.94 (0.03)	0.00065011	0.92 (0.01)	9.93333e-05	0.93 (0.02)	0.00026559
MLF1	E243	0.000277533	0.3 (0.07)	7.08333e-05	0.16 (0.04)	0.00015002	0.25 (0.35)	7.72825e-05	0.3 (0.1)	-9e-06	0.29 (0.05)	4.51017e-05	0.2 (0.07)	0.000305639	0.27 (0.11)	-0.000269667	0.42 (0.11)	2.48743e-05	0.44 (0.06)	0.00224293	0.39 (0.13)	-6.63333e-05	0.35 (0.06)	0.00020739
MLF1	P97	0.00118956	0.3 (0.05)	0.000435167	0.03 (0.01)	0.00170975	0.05 (0.06)	0.00283531	0.34 (0.13)	0.000103	0.29 (0.08)	0.000374855	0.03 (0.01)	0.00499464	0.28 (0.09)	0.000558167	0.42 (0.15)	0.000213271	0.37 (0.09)	0.00148383	0.24 (0.01)	0.0006585	0.28 (0.06)	0.00115619
MLH1	P381	0.000402555	0.04 (0.01)	0.000208333	0.02 (0.05)	0.000222327	0.02 (0.01)	0.000553736	0.03 (0)	0.000173	0.03 (0.01)	0.000114281	0.02 (0)	0.00300955	0.04 (0.01)	0.0005313	0.05 (0.02)	0.000107409	0.04 (0.01)	0.000251394	0.05 (0.01)	0.000315333	0.04 (0.01)	0.000427167
MLH3	E72	0.000235885	0.05 (0.01)	6.5e-05	0.03 (0)	5.6802e-05	0.09 (0.03)	0.000555015	0.03 (0.01)	3.5e-05	0.03 (0.01)	1.29779e-05	0.11 (0.02)	0.00307998	0.05 (0.02)	-2.69333e-05	0.04 (0.03)	1.57915e-06	0.04 (0.01)	1.81408e-05	0.03 (0)	0.000199667	0.04 (0.01)	0.000145598
MLH3	P25	0.00130639	0.16 (0.02)	0.0002565	0.03 (0.01)	0.00369515	0.04 (0.05)	0.00123284	0.06 (0.02)	0.000209	0.12 (0.03)	0.0010898	0.03 (0.01)	0.00249118	0.15 (0.06)	-0.000241733	0.15 (0.04)	0.000115499	0.2 (0.04)	0.00129492	0.2 (0.03)	0.000249167	0.16 (0.03)	0.00087027
MLLT3	E93	0.000132651	0.03 (0.01)	0.0001525	0.01 (0)	0.000399664	0.02 (0)	2.94079e-05	0.03 (0)	8e-05	0.02 (0)	2.06277e-05	0.02 (0)	0.000305119	0.03 (0.01)	0.000118567	0.03 (0.01)	9.55936e-05	0.03 (0.01)	4.2526e-05	0.03 (0.01)	-9.05e-05	0.03 (0)	0.000159297
MLLT4	P1400	0.00190155	0.07 (0.02)	0.000153167	0.04 (0.01)	0.00113541	0.05 (0.06)	0.00181013	0.08 (0.09)	-0.000185	0.03 (0.01)	0.000684346	0.07 (0.04)	0.000430903	0.06 (0.02)	0.0002917	0.05 (0.01)	0.00166669	0.15 (0.06)	0.00296902	0.07 (0.03)	-0.0008055	0.15 (0.05)	0.00434236
MLLT6	P957	0.000807565	0.1 (0.03)	-1.41667e-05	0.03 (0.01)	0.00157596	0.05 (0.03)	0.000409507	0.03 (0)	0.000331	0.19 (0.06)	0.000974869	0.04 (0.02)	0.000573927	0.06 (0.03)	0.000477033	0.15 (0.06)	4.41862e-05	0.14 (0.05)	0.000617627	0.08 (0.01)	0.000300667	0.09 (0.03)	0.000876515
MME	E29	7.2736e-05	0.11 (0.03)	3.21667e-05	0.16 (0.04)	4.20872e-05	0.13 (0.05)	5.80127e-05	0.1 (0.07)	-3.6e-05	0.07 (0.04)	2.10315e-05	0.25 (0.09)	0.000866944	0.12 (0.03)	4.93333e-05	0.1 (0.07)	5.84074e-06	0.16 (0.07)	1.60988e-05	0.1 (0.02)	4.88333e-05	0.16 (0.06)	4.32327e-05
MME	P388	7.02667e-05	0.07 (0.03)	-4.75e-05	0.06 (0.03)	6.52051e-06	0.17 (0.25)	-4.80952e-07	0.06 (0.01)	4.6e-05	0.05 (0.03)	1.17507e-05	0.13 (0.07)	1.99802e-05	0.11 (0.03)	3.23333e-05	0.07 (0.05)	1.00115e-05	0.13 (0.05)	0.000131244	0.08 (0.04)	-5.15e-05	0.11 (0.03)	0.000219213
MMP1	P397	5.99781e-05	0.96 (0.01)	1.01667e-05	0.98 (0)	0.00015321	0.98 (0.01)	3.91143e-05	0.97 (0)	-5e-06	0.96 (0.01)	6.4153e-05	0.97 (0)	2.58333e-05	0.97 (0.01)	4.34333e-05	0.98 (0.01)	1.34815e-05	0.98 (0)	8.40584e-05	0.92 (0.07)	0.000206167	0.97 (0.01)	1.70289e-05
MMP1	P460	5.21207e-05	0.96 (0.01)	5.23333e-05	0.97 (0)	8.138e-06	0.97 (0.01)	-3.15556e-06	0.97 (0.01)	7e-06	0.96 (0.01)	9.48969e-06	0.97 (0.01)	7.05786e-05	0.97 (0)	0.000195533	0.97 (0.01)	1.1176e-06	0.98 (0.01)	0.000329791	0.93 (0.05)	0.0002185	0.97 (0.01)	2.43598e-05
MMP10	E136	2.94582e-05	0.62 (0.04)	7.18333e-05	0.65 (0.13)	9.83009e-06	0.54 (0.04)	5.24e-05	0.64 (0.23)	-5.2e-05	0.62 (0.07)	7.15807e-06	0.42 (0.12)	0.000142902	0.53 (0.07)	6.24333e-05	0.44 (0.17)	7.37078e-06	0.57 (0.12)	-1.41067e-05	0.61 (0.08)	-7.86667e-05	0.55 (0.07)	5.99632e-05
MMP14	P13	7.85783e-05	0.47 (0.21)	-2.48333e-05	0.56 (0.1)	4.88355e-05	0.57 (0.18)	5.13619e-05	0.41 (0.21)	-7e-06	0.51 (0.08)	0.000122597	0.37 (0.18)	-6.22222e-07	0.34 (0.21)	-8.93333e-06	0.21 (0.07)	0.000338459	0.45 (0.14)	-2.03944e-05	0.43 (0.17)	-1.06667e-05	0.47 (0.14)	4.71308e-05
MMP14	P208	7.15479e-05	0.34 (0.1)	-2.23333e-05	0.25 (0.08)	2.291e-05	0.22 (0.12)	6.8746e-06	0.3 (0.35)	1.9e-05	0.39 (0.09)	7.08655e-05	0.17 (0.08)	0.000135329	0.23 (0.07)	9.81e-05	0.23 (0.1)	2.95524e-05	0.37 (0.08)	-2.84904e-05	0.35 (0.09)	3.66667e-06	0.36 (0.09)	0.000161354
MMP19	E274	0.000151672	0.86 (0.03)	0.000127333	0.95 (0.01)	0.000172521	0.93 (0.05)	0.000643644	0.84 (0.14)	-9.3e-05	0.91 (0.02)	9.44424e-05	0.89 (0.04)	7.71214e-05	0.87 (0.06)	0.0001006	0.77 (0.12)	0.000317758	0.87 (0.03)	9.2458e-05	0.9 (0.01)	6.63333e-05	0.89 (0.03)	8.56648e-05
MMP19	P306	0.00123787	0.82 (0.04)	0.000158	0.88 (0.03)	8.08438e-05	0.85 (0.05)	0.000653605	0.87 (0.03)	7.8e-05	0.9 (0.03)	6.855e-05	0.78 (0.04)	0.000477122	0.86 (0.02)	0.000557867	0.52 (0.11)	0.0113163	0.85 (0.03)	0.00036517	0.85 (0.04)	0.000120833	0.84 (0.03)	0.000628348
MMP2	E21	6.43032e-05	0.11 (0.06)	-3.91667e-05	0.04 (0.01)	3.96334e-05	0.06 (0.02)	7.57381e-06	0.1 (0.12)	4e-06	0.05 (0.02)	5.41994e-05	0.07 (0.03)	8.99603e-06	0.12 (0.08)	-5.76667e-06	0.09 (0.05)	-1.5316e-06	0.1 (0.03)	-3.95573e-05	0.11 (0.05)	-2.01667e-05	0.11 (0.03)	0.000198249
MMP2	P197	0.000954199	0.12 (0.07)	-9.75e-05	0.03 (0.01)	0.0011279	0.1 (0.05)	0.00039889	0.12 (0.08)	-0.000145	0.03 (0.01)	0.00146306	0.15 (0.1)	0.00040486	0.21 (0.1)	0.0005646	0.16 (0.09)	0.000523783	0.13 (0.09)	0.00032876	0.14 (0.12)	2.98333e-05	0.11 (0.04)	0.00126635
MMP2	P303	0.000574911	0.36 (0.23)	0.0002345	0.02 (0.01)	0.00099853	0.37 (0.2)	0.000497328	0.45 (0.29)	0.000151	0.03 (0.01)	0.000676622	0.35 (0.19)	0.000579548	0.24 (0.1)	0.000388633	0.07 (0.04)	0.000134237	0.18 (0.13)	0.000277678	0.18 (0.16)	-9.38333e-05	0.13 (0.07)	0.000646725
MMP3	P16	0.000156199	0.79 (0.11)	0.000810167	0.94 (0.01)	0.000350725	0.85 (0.04)	0.000171379	0.91 (0.02)	8e-06	0.91 (0.02)	5.90862e-06	0.81 (0.19)	0.000119403	0.92 (0.02)	4.99333e-05	0.89 (0.02)	4.49132e-05	0.88 (0.08)	8.96364e-05	0.89 (0.04)	-4.86667e-05	0.91 (0.02)	0.000237218
MMP3	P55	0.00131679	0.81 (0.05)	0.000439667	0.94 (0.01)	0.00696791	0.9 (0.03)	-0.000284089	0.87 (0.05)	-2.8e-05	0.88 (0.02)	0.000773348	0.87 (0.07)	0.000422068	0.87 (0.04)	0.000174967	0.83 (0.05)	0.000466387	0.83 (0.04)	0.00055731	0.87 (0.02)	0.0001465	0.86 (0.03)	0.000415908
MMP7	E59	7.62164e-05	0.45 (0.12)	0.00032	0.15 (0.06)	3.76751e-05	0.27 (0.08)	4.16135e-05	0.17 (0.15)	3.9e-05	0.2 (0.06)	6.07665e-05	0.19 (0.08)	0.000118579	0.31 (0.07)	1.70667e-05	0.52 (0.12)	0.000224917	0.37 (0.07)	9.37539e-05	0.35 (0.07)	-3.16667e-05	0.34 (0.08)	4.01645e-05
MMP7	P613	1.05029e-05	0.86 (0.02)	-6.98333e-05	0.82 (0.02)	4.12745e-05	0.85 (0.02)	-2.30397e-06	0.9 (0.01)	0.000172	0.85 (0.02)	1.46417e-06	0.84 (0.02)	-3.03968e-07	0.84 (0.05)	3.16667e-06	0.84 (0.05)	-1.24053e-06	0.85 (0.02)	-2.40822e-05	0.87 (0.02)	5.48333e-05	0.85 (0.03)	1.37957e-05
MMP8	E89	0.000222396	0.88 (0.09)	-1.66667e-07	0.76 (0.06)	0.000554806	0.93 (0.01)	0.000237218	0.9 (0.03)	4e-06	0.79 (0.06)	0.000178052	0.91 (0.02)	0.000183847	0.91 (0.01)	3.35667e-05	0.94 (0.04)	0.000180498	0.93 (0.03)	0.000380506	0.86 (0.08)	4.46667e-05	0.91 (0.03)	0.000100973
MMP9	E88	7.96541e-05	0.87 (0.03)	9.81667e-05	0.88 (0.04)	2.49935e-06	0.92 (0.02)	0.000154833	0.91 (0.03)	-1.4e-05	0.86 (0.03)	5.45719e-05	0.89 (0.03)	-3.61429e-06	0.89 (0.02)	0.000168833	0.85 (0.07)	1.34663e-05	0.92 (0.02)	0.000472645	0.89 (0.02)	7.78333e-05	0.9 (0.02)	3.27756e-05
MMP9	P189	0.00444864	0.62 (0.11)	0.000837667	0.36 (0.1)	0.000137663	0.77 (0.17)	0.00325733	0.64 (0.04)	0.000438	0.18 (0.05)	0.0106905	0.63 (0.16)	0.00296423	0.58 (0.08)	0.0017725	0.77 (0.09)	0.00424312	0.61 (0.14)	0.00128089	0.63 (0.09)	0.000822833	0.67 (0.08)	0.00369234
MMP9	P237	6.87629e-05	0.1 (0.02)	4.71667e-05	0.07 (0.01)	2.43902e-05	0.12 (0.04)	3.13111e-05	0.04 (0.01)	0.000172	0.06 (0.02)	5.53511e-05	0.1 (0.04)	4.8454e-05	0.08 (0.01)	0.000140533	0.17 (0.11)	6.3816e-06	0.12 (0.04)	1.32088e-05	0.13 (0.08)	6.45e-05	0.13 (0.05)	0.000150081
MOS	E60	0.000115455	0.17 (0.03)	6.5e-06	0.16 (0.11)	1.18762e-06	0.12 (0.12)	0.000106138	0.38 (0.3)	-5e-06	0.12 (0.05)	2.91666e-05	0.25 (0.14)	7.16746e-06	0.16 (0.05)	-3.50667e-05	0.28 (0.12)	1.15283e-05	0.26 (0.13)	-0.000139215	0.38 (0.27)	1.48333e-05	0.25 (0.13)	0.000468302
MOS	P27	2.55022e-05	0.07 (0.02)	4.96667e-05	0.07 (0.04)	3.95339e-06	0.15 (0.08)	0.000102795	0.13 (0.13)	-2.3e-05	0.07 (0.05)	9.6651e-07	0.09 (0.04)	-1.97056e-05	0.07 (0.02)	1.27e-05	0.21 (0.11)	4.3277e-05	0.08 (0.03)	-1.40462e-05	0.11 (0.07)	-3.6e-05	0.1 (0.05)	6.03214e-05
MOS	P746	0.00036217	0.7 (0.12)	2.16667e-05	0.86 (0.06)	4.97513e-05	0.83 (0.08)	0.000463633	0.73 (0.16)	-5.5e-05	0.78 (0.06)	2.43673e-05	0.75 (0.05)	0.000191344	0.7 (0.06)	0.000290933	0.33 (0.14)	0.00297735	0.76 (0.06)	9.91106e-05	0.8 (0.02)	0.000117333	0.76 (0.07)	0.000108166
MPL	P62	0.00391898	0.87 (0.02)	0.000816833	0.46 (0.1)	0.00547429	0.93 (0.02)	0.00375222	0.86 (0.06)	0.000365	0.42 (0.11)	0.00590429	0.87 (0.07)	0.00182279	0.9 (0.02)	0.001773	0.92 (0.04)	0.00396379	0.85 (0.06)	0.00116087	0.87 (0.04)	0.0008215	0.85 (0.04)	0.00349072
MPL	P657	6.29467e-05	0.59 (0.06)	9.11667e-05	0.66 (0.06)	5.8979e-06	0.61 (0.1)	-4.37e-05	0.4 (0.33)	-6.5e-05	0.69 (0.08)	3.55854e-06	0.6 (0.08)	-2.86738e-05	0.41 (0.09)	0.0024278	0.76 (0.08)	4.74648e-05	0.66 (0.07)	2.78512e-05	0.66 (0.07)	-6.11667e-05	0.68 (0.07)	1.03326e-05
MPO	E302	0.00135431	0.88 (0.01)	-0.000164	0.76 (0.06)	9.44405e-05	0.94 (0.04)	0.00374074	0.85 (0.07)	-0.000123	0.74 (0.05)	0.000313562	0.9 (0.04)	0.000614111	0.91 (0.02)	0.00211707	0.89 (0.05)	0.00157171	0.87 (0.08)	0.00262456	0.89 (0.02)	0.000659333	0.85 (0.04)	0.00238786
MPO	P883	0.000903849	0.24 (0.04)	0.000297	0.06 (0.02)	0.00341508	0.63 (0.23)	0.00152126	0.38 (0.3)	-0.000276	0.2 (0.05)	0.000139034	0.31 (0.13)	0.000342495	0.56 (0.1)	0.00156123	0.3 (0.09)	0.000329462	0.38 (0.11)	0.000251783	0.27 (0.13)	0.000223833	0.35 (0.07)	0.000886241
MSH2	P1008	7.87714e-05	0.59 (0.1)	0.000141333	0.83 (0.04)	9.19034e-05	0.72 (0.07)	-2.7804e-05	0.52 (0.19)	-3.1e-05	0.73 (0.06)	2.75811e-05	0.62 (0.13)	1.61889e-05	0.33 (0.15)	0.00163177	0.72 (0.06)	1.98514e-06	0.73 (0.06)	2.42855e-05	0.7 (0.05)	-2.83333e-05	0.73 (0.06)	5.26135e-05
MSH3	E3	6.03473e-05	0.86 (0.04)	8.26667e-05	0.85 (0.16)	-1.13037e-07	0.85 (0.06)	0.00010891	0.84 (0.08)	2.4e-05	0.85 (0.12)	2.01003e-05	0.87 (0.05)	5.2927e-05	0.88 (0.04)	5.31e-05	0.84 (0.17)	-6.32482e-06	0.91 (0.04)	0.000166556	0.73 (0.38)	-2.23333e-05	0.91 (0.06)	0.00010843
MSH3	P13	4.46438e-05	0.68 (0.09)	0.0001825	0.73 (0.15)	1.54725e-06	0.67 (0.09)	4.86992e-05	0.67 (0.06)	2.4e-05	0.73 (0.12)	2.056e-06	0.75 (0.06)	-6.89524e-06	0.7 (0.07)	9.79667e-05	0.67 (0.19)	3.43247e-06	0.76 (0.08)	5.72283e-05	0.6 (0.31)	6.3e-05	0.74 (0.09)	0.000115336
MST1R	E42	0.00034072	0.69 (0.08)	0.000237833	0.75 (0.07)	3.92815e-05	0.85 (0.06)	0.00111367	0.31 (0.29)	0.000209	0.82 (0.04)	0.000248275	0.5 (0.21)	0.000529844	0.82 (0.06)	0.000862233	0.76 (0.06)	0.000120883	0.56 (0.1)	0.000421447	0.5 (0.13)	0.000576667	0.55 (0.1)	0.000374495
MST1R	P392	0.00098076	0.2 (0.03)	0.00277083	0.04 (0.03)	0.000143807	0.67 (0.19)	0.00684969	0.08 (0.09)	-0.000159	0.08 (0.03)	2.01199e-05	0.12 (0.04)	5.51389e-05	0.27 (0.15)	0.000834133	0.13 (0.07)	0.000177205	0.1 (0.04)	0.00037157	0.08 (0.03)	-7.3e-05	0.08 (0.03)	0.00195713
MST1R	P87	0.000947853	0.57 (0.08)	0.000496667	0.82 (0.07)	0.000339742	0.79 (0.1)	0.00147397	0.27 (0.22)	0.000318	0.84 (0.04)	0.00130375	0.52 (0.18)	0.00118392	0.7 (0.13)	0.000134367	0.44 (0.08)	0.000932472	0.53 (0.08)	0.000901066	0.48 (0.1)	0.000482333	0.55 (0.09)	0.00102261
MT1A	E13	0.000106893	0.1 (0.02)	7.1e-05	0.07 (0.04)	3.95108e-05	0.22 (0.07)	0.000213496	0.1 (0.12)	2.9e-05	0.1 (0.04)	1.85068e-06	0.13 (0.06)	5.71905e-06	0.09 (0.03)	4.49667e-05	0.13 (0.07)	-4.92201e-06	0.2 (0.14)	4.68628e-05	0.15 (0.04)	5.13333e-05	0.14 (0.07)	0.000332303
MT1A	P49	5.14292e-05	0.04 (0.01)	2.16667e-05	0.02 (0.01)	1.00118e-05	0.03 (0.03)	2.43913e-05	0.03 (0)	2.2e-05	0.02 (0.01)	2.90115e-05	0.07 (0.04)	0.000147129	0.03 (0.01)	1.34333e-05	0.03 (0.01)	2.74269e-05	0.08 (0.11)	0.000108147	0.04 (0.01)	-3.46667e-05	0.05 (0.06)	8.10969e-05
MT1A	P600	0.00630312	0.55 (0.15)	0.001429	0.09 (0.04)	0.00984383	0.68 (0.08)	0.00502474	0.64 (0.19)	0.000641	0.1 (0.03)	0.00878349	0.71 (0.18)	0.00484855	0.65 (0.06)	0.00279157	0.42 (0.09)	0.0056914	0.6 (0.12)	0.00318497	0.49 (0.12)	0.00118133	0.53 (0.1)	0.00544075
MTA1	P478	5.23967e-05	0.12 (0.05)	-4.55e-05	0.05 (0.02)	8.46664e-05	0.06 (0.04)	6.87135e-05	0.25 (0.21)	-2.4e-05	0.13 (0.05)	1.46499e-05	0.06 (0.03)	0.000137625	0.12 (0.06)	-2.14667e-05	0.15 (0.07)	1.30825e-06	0.15 (0.04)	1.18828e-05	0.13 (0.04)	-2.48333e-05	0.14 (0.05)	0.000108131
MUC1	E18	0.000174474	0.73 (0.07)	0.000333167	0.45 (0.1)	6.85231e-05	0.74 (0.05)	0.00135284	0.49 (0.17)	3.5e-05	0.48 (0.08)	6.19965e-05	0.43 (0.14)	0.000808579	0.68 (0.06)	0.000161933	0.62 (0.12)	8.07359e-08	0.68 (0.06)	0.000159299	0.62 (0.15)	-1.98333e-05	0.62 (0.08)	5.60369e-05
MUC1	P191	0.000395504	0.21 (0.02)	0.0002475	0.05 (0.02)	0.000476257	0.47 (0.11)	0.00239895	0.1 (0.1)	-4e-06	0.14 (0.05)	5.54808e-05	0.1 (0.04)	0.00192896	0.34 (0.14)	0.000117833	0.24 (0.12)	8.40017e-06	0.33 (0.1)	0.000206051	0.24 (0.06)	0.000163333	0.29 (0.08)	0.000267248
MUSK	P308	0.000423899	0.86 (0.03)	2.65e-05	0.93 (0.01)	0.00159882	0.93 (0.04)	0.00081751	0.9 (0.02)	6.2e-05	0.84 (0.03)	0.000418523	0.91 (0.02)	0.000260793	0.85 (0.06)	3.45667e-05	0.82 (0.09)	4.07925e-05	0.83 (0.02)	0.000226844	0.85 (0.02)	5.76667e-05	0.85 (0.04)	5.36578e-05
MXI1	P1269	2.51243e-05	0.71 (0.12)	-3.61667e-05	0.67 (0.14)	-8.00585e-07	0.74 (0.08)	3.42929e-05	0.76 (0.02)	4.4e-05	0.62 (0.07)	2.56355e-05	0.73 (0.07)	3.08849e-05	0.69 (0.09)	-2.08667e-05	0.49 (0.12)	0.000154814	0.72 (0.09)	-1.73584e-05	0.74 (0.09)	1.21667e-05	0.7 (0.07)	1.07574e-05
MXI1	P75	6.42345e-05	0.1 (0.06)	6.51667e-05	0.04 (0.02)	4.84751e-05	0.04 (0.03)	7.21071e-05	0.03 (0.01)	0.00015	0.08 (0.04)	-3.43867e-07	0.04 (0.01)	0.00028824	0.08 (0.03)	-3.76667e-06	0.15 (0.1)	3.13012e-06	0.12 (0.05)	2.31717e-05	0.13 (0.02)	8.78333e-05	0.12 (0.03)	0.000120477
MYB	P673	0.000470771	0.1 (0.04)	-0.000100333	0.05 (0.01)	0.00165338	0.06 (0.02)	0.000125808	0.06 (0.01)	0.00019	0.1 (0.02)	0.000513993	0.06 (0.02)	0.000306078	0.12 (0.02)	0.000174	0.12 (0.03)	4.32611e-05	0.13 (0.03)	0.000323499	0.09 (0.02)	2e-05	0.11 (0.02)	0.000221383
MYBL2	P211	0.000797504	0.05 (0.02)	6.83333e-06	0.01 (0)	0.00362332	0.02 (0.01)	0.000476794	0.04 (0.01)	3.4e-05	0.04 (0.02)	0.000827307	0.03 (0.01)	1.10294e-05	0.07 (0.01)	0.0004234	0.06 (0.04)	5.42727e-05	0.07 (0.06)	3.98459e-05	0.04 (0.02)	-1.16667e-06	0.05 (0.01)	0.000195401
MYBL2	P354	0.000181323	0.22 (0.05)	0.000148833	0.04 (0.02)	0.000139461	0.1 (0.05)	1.69349e-05	0.1 (0.07)	-8.6e-05	0.1 (0.04)	4.66418e-05	0.07 (0.02)	0.00113072	0.2 (0.05)	0.000308267	0.24 (0.1)	3.54305e-05	0.22 (0.06)	0.000252266	0.21 (0.04)	0.000212833	0.18 (0.04)	0.000225164
MYCL1	P502	1.78149e-05	0.07 (0.03)	4e-06	0.09 (0.07)	-2.83217e-06	0.08 (0.03)	-1.83175e-06	0.03 (0)	0.000137	0.08 (0.03)	-1.24339e-06	0.05 (0.02)	4.03349e-05	0.07 (0.03)	-4.47e-05	0.08 (0.04)	-1.0367e-06	0.11 (0.06)	6.22623e-05	0.07 (0.01)	2.85e-05	0.09 (0.02)	3.86444e-05
MYCN	E77	0.000131486	0.07 (0.01)	7.51667e-05	0.03 (0.01)	0.000149456	0.04 (0.02)	0.000121321	0.08 (0.03)	-2.6e-05	0.05 (0.01)	2.34484e-05	0.04 (0.01)	0.000281067	0.06 (0.02)	-6.56e-05	0.08 (0.03)	6.24006e-05	0.09 (0.02)	0.000319924	0.07 (0.01)	1.2e-05	0.07 (0.01)	0.000201547
MYCN	P464	0.000164639	0.03 (0.01)	7.76667e-05	0.03 (0)	2.06716e-05	0.03 (0)	1.00873e-06	0.05 (0.03)	5.9e-05	0.02 (0.01)	1.44837e-05	0.03 (0.01)	2.20952e-06	0.03 (0.01)	-1.15e-05	0.03 (0.01)	3.00729e-06	0.04 (0.06)	-0.000128822	0.03 (0)	-7.05e-05	0.03 (0)	0.000698934
MYH11	P22	2.97872e-05	0.1 (0.02)	3.76667e-05	0.05 (0.04)	1.04915e-05	0.04 (0.02)	0.000142098	0.24 (0.37)	-3.9e-05	0.09 (0.04)	5.59643e-06	0.07 (0.04)	-1.70714e-05	0.12 (0.1)	-2.12667e-05	0.17 (0.09)	1.62076e-05	0.14 (0.1)	7.75315e-05	0.15 (0.14)	2.26667e-05	0.09 (0.06)	4.77015e-05
MYH11	P236	6.14987e-05	0.05 (0.02)	-6.7e-05	0.02 (0)	0.000186958	0.04 (0.04)	1.32397e-05	0.04 (0)	1.3e-05	0.04 (0.02)	5.23432e-07	0.07 (0.04)	4.2023e-05	0.06 (0.02)	0.0001412	0.06 (0.04)	6.62463e-06	0.08 (0.04)	0.000107941	0.04 (0.01)	6.51667e-05	0.06 (0.02)	7.24319e-05
MYLK	E132	0.000356189	0.36 (0.04)	0.000103	0.12 (0.04)	0.000783686	0.11 (0.1)	0.000309819	0.2 (0.09)	-4.4e-05	0.26 (0.04)	0.000456158	0.11 (0.03)	0.000922044	0.29 (0.09)	-1.94333e-05	0.32 (0.08)	2.61904e-05	0.39 (0.07)	0.000342398	0.31 (0.07)	3.93333e-05	0.34 (0.07)	0.000119273
MYLK	P469	0.00155676	0.22 (0.05)	0.000284333	0.16 (0.04)	0.000368731	0.14 (0.05)	0.000773975	0.28 (0.02)	0.000284	0.08 (0.02)	0.00284313	0.33 (0.12)	0.00190961	0.22 (0.04)	0.000930167	0.09 (0.04)	0.00170009	0.28 (0.08)	0.000948685	0.26 (0.06)	0.000452167	0.26 (0.05)	0.00164474
MYOD1	E156	0.000286055	0.08 (0.03)	-3.83333e-06	0.14 (0.04)	0.000661828	0.05 (0.02)	9.36706e-05	0.17 (0.12)	1.5e-05	0.04 (0.02)	0.00059667	0.13 (0.05)	0.000257641	0.08 (0.04)	5.23333e-06	0.07 (0.05)	-1.17727e-07	0.14 (0.13)	4.21676e-05	0.21 (0.23)	7.43333e-05	0.08 (0.03)	7.63088e-05
MYOD1	P50	2.30757e-05	0.13 (0.04)	-4.78333e-05	0.13 (0.05)	4.72573e-06	0.09 (0.05)	2.9923e-05	0.18 (0.19)	-5.4e-05	0.11 (0.04)	9.47307e-06	0.13 (0.07)	1.62302e-06	0.18 (0.09)	2.17333e-05	0.1 (0.07)	4.16267e-06	0.17 (0.05)	3.16283e-05	0.28 (0.18)	0.0002575	0.15 (0.04)	4.51429e-05
NAT2	P11	0.00269902	0.67 (0.12)	0.000496	0.93 (0.01)	0.00514615	0.81 (0.09)	0.00137534	0.79 (0.02)	0.000412	0.91 (0.02)	0.00305969	0.78 (0.09)	0.000622923	0.55 (0.07)	0.00312353	0.66 (0.09)	0.00289698	0.74 (0.05)	0.00153496	0.63 (0.2)	0.000672	0.77 (0.06)	0.00259804
NBL1	E205	0.000106453	0.83 (0.04)	-1.66667e-05	0.91 (0.05)	0.000123497	0.83 (0.05)	6.8604e-05	0.46 (0.36)	0.000132	0.88 (0.04)	6.34562e-05	0.6 (0.19)	0.000220844	0.77 (0.09)	3.83333e-05	0.49 (0.17)	0.000301477	0.8 (0.05)	0.000114673	0.78 (0.13)	-2.06667e-05	0.81 (0.05)	7.13593e-05
NBL1	P24	0.000893779	0.67 (0.11)	8.23333e-05	0.93 (0.03)	0.00331523	0.74 (0.09)	0.000519312	0.34 (0.22)	0.000175	0.78 (0.07)	0.000135244	0.48 (0.23)	0.000610414	0.75 (0.08)	0.000313367	0.23 (0.1)	0.00142812	0.65 (0.07)	0.000499902	0.59 (0.23)	0.000116667	0.66 (0.08)	0.000641126
NCL	P1102	0.00154377	0.9 (0.02)	0.000374667	0.97 (0)	0.00769167	0.95 (0.02)	0.00062083	0.83 (0.09)	0.00018	0.92 (0.02)	0.000789697	0.94 (0.01)	0.000528585	0.86 (0.06)	0.0007254	0.9 (0.03)	0.000608752	0.93 (0.02)	0.000354605	0.93 (0.01)	0.000127667	0.93 (0.02)	0.000530529
NCL	P840	0.000254238	0.09 (0.05)	-5.58333e-05	0.03 (0.01)	0.00012616	0.04 (0.02)	0.000208083	0.04 (0)	0.000256	0.08 (0.03)	2.63474e-05	0.04 (0.01)	0.000663587	0.09 (0.03)	5.08333e-05	0.12 (0.06)	1.91919e-06	0.1 (0.03)	0.00042294	0.06 (0.01)	0.000147833	0.08 (0.03)	0.000563385
NDN	E131	0.00092451	0.76 (0.02)	0.000229667	0.83 (0.03)	0.0011143	0.78 (0.05)	0.000189815	0.84 (0.04)	0.000191	0.63 (0.05)	0.00177733	0.85 (0.04)	0.000783772	0.77 (0.05)	0.000143867	0.64 (0.1)	0.000425006	0.75 (0.03)	0.000227788	0.81 (0.03)	0.0004825	0.78 (0.04)	0.000818946
NDN	P1110	0.000195501	0.93 (0.02)	-4.03333e-05	0.94 (0.02)	3.19982e-05	0.92 (0.02)	0.000131382	0.95 (0.01)	0.00026	0.93 (0.02)	1.54657e-05	0.89 (0.03)	0.000402013	0.93 (0.01)	0.0001373	0.74 (0.12)	0.000756519	0.91 (0.02)	4.3108e-05	0.94 (0.01)	0.000355667	0.91 (0.03)	0.000261113
NEFL	E23	9.77816e-05	0.38 (0.18)	3.16667e-05	0.13 (0.13)	2.31081e-05	0.2 (0.13)	1.35127e-05	0.52 (0.28)	2e-05	0.19 (0.16)	5.23326e-06	0.23 (0.12)	1.1404e-05	0.36 (0.27)	-5.53333e-06	0.7 (0.16)	0.000125462	0.32 (0.17)	-0.000149022	0.39 (0.24)	-1.2e-05	0.3 (0.19)	0.000398499
NEFL	P209	7.51023e-05	0.15 (0.04)	1.93333e-05	0.13 (0.04)	1.40199e-05	0.16 (0.18)	3.61921e-05	0.34 (0.3)	-3e-06	0.09 (0.04)	9.43041e-05	0.21 (0.09)	7.40516e-05	0.19 (0.08)	-1.26667e-06	0.6 (0.17)	0.000360878	0.23 (0.15)	2.93151e-05	0.32 (0.3)	3.51667e-05	0.19 (0.08)	3.21865e-05
NEO1	P1067	0.00230219	0.09 (0.04)	0.000117333	0.11 (0.07)	2.48273e-05	0.05 (0.04)	0.00252372	0.13 (0.14)	-0.000143	0.08 (0.05)	6.30079e-05	0.11 (0.05)	0.000378274	0.07 (0.01)	0.0033759	0.06 (0.06)	0.00147762	0.16 (0.07)	-0.000614508	0.09 (0.02)	0.001473	0.22 (0.08)	0.0078407
NES	P239	0.00040833	0.15 (0.1)	-1e-06	0.19 (0.11)	7.26304e-06	0.16 (0.06)	0.000342888	0.15 (0.19)	3e-05	0.25 (0.09)	1.4341e-05	0.2 (0.05)	0.000299239	0.1 (0.04)	0.000557	0.59 (0.12)	0.00352792	0.18 (0.05)	0.000163284	0.24 (0.04)	0.000240333	0.2 (0.08)	8.36102e-05
NEU1	P745	0.000252999	0.09 (0.08)	-5.96667e-05	0.05 (0.04)	2.34686e-05	0.06 (0.07)	4.09683e-05	0.18 (0.27)	-7.4e-05	0.12 (0.05)	1.5577e-05	0.11 (0.07)	2.04222e-05	0.66 (0.14)	0.00311777	0.2 (0.09)	5.22389e-05	0.08 (0.03)	7.23559e-05	0.41 (0.34)	0.000507	0.08 (0.03)	0.00061423
NFKB1	P336	3.20095e-05	0.08 (0.03)	1.8e-05	0.06 (0.08)	7.8742e-06	0.03 (0.02)	0.00017609	0.18 (0.17)	-1.7e-05	0.1 (0.13)	7.9654e-06	0.08 (0.07)	4.94206e-06	0.09 (0.02)	1.61e-05	0.15 (0.17)	-1.9697e-07	0.14 (0.13)	0.00016761	0.07 (0.03)	-3e-05	0.11 (0.08)	1.49745e-05
NFKB1	P496	0.00702692	0.17 (0.05)	0.0009655	0.26 (0.06)	0.00698233	0.13 (0.08)	0.00366471	0.35 (0.15)	7.2e-05	0.68 (0.07)	0.0171282	0.14 (0.04)	0.00353944	0.2 (0.09)	0.001887	0.51 (0.17)	0.00182264	0.21 (0.05)	0.00221971	0.2 (0.04)	0.000869167	0.17 (0.04)	0.00407342
			Bladder (n=5)		Blood (n=30)		Brain (n=12)		Cervix (n=3)		Infant blood (n=55)		Head and neck (n=11)		Kidney (n=6)		Placenta (n=19)		Pleura (n=18)		Small intestine (n=5)		Lung (n=53)
GENE	CpG	Mean decrease in accuracy	Mean (sd)	Decrease in accuracy	Mean (sd)	Decrease in accuracy	Mean (sd)	Decrease in accuracy	Mean (sd)	Decrease in accuracy	Mean (sd)	Decrease in accuracy	Mean (sd)	Decrease in accuracy	Mean (sd)	Decrease in accuracy	Mean (sd)	Decrease in accuracy	Mean (sd)	Decrease in accuracy	Mean (sd)	Decrease in accuracy	Mean (sd)	Decrease in accuracy
NFKB2	P709	8.32586e-05	0.08 (0.04)	-8.18333e-05	0.03 (0.01)	9.73481e-05	0.05 (0.02)	-2.08968e-06	0.04 (0)	0.000119	0.1 (0.05)	1.235e-05	0.04 (0.01)	0.000367545	0.07 (0.02)	-1.10667e-05	0.11 (0.04)	1.76914e-05	0.08 (0.02)	8.99235e-05	0.06 (0.02)	4.16667e-05	0.07 (0.04)	0.000150632
NGFB	E353	0.000834617	0.22 (0.06)	-3.95e-05	0.03 (0.01)	0.00343022	0.06 (0.08)	0.000208816	0.07 (0.07)	0.00011	0.17 (0.05)	0.00125528	0.07 (0.06)	0.000105555	0.14 (0.06)	4.76667e-06	0.3 (0.13)	1.81191e-05	0.26 (0.07)	0.000277186	0.19 (0.06)	4.66667e-05	0.19 (0.06)	1.73203e-05
NGFB	P13	2.94046e-05	0.27 (0.07)	6.33333e-06	0.15 (0.02)	3.56937e-05	0.15 (0.08)	1.1504e-05	0.23 (0.02)	3.8e-05	0.18 (0.03)	3.05394e-05	0.18 (0.06)	2.53825e-05	0.27 (0.06)	2.97e-05	0.24 (0.08)	6.37771e-06	0.26 (0.07)	-2.03501e-05	0.3 (0.08)	4.86667e-05	0.25 (0.05)	5.13137e-05
NGFR	E328	5.6378e-05	0.12 (0.03)	-1.78333e-05	0.06 (0.04)	3.13358e-05	0.09 (0.04)	3.33865e-05	0.13 (0.15)	-4.8e-05	0.13 (0.04)	1.03606e-05	0.07 (0.02)	0.000196685	0.11 (0.03)	6.82333e-05	0.19 (0.09)	1.00631e-05	0.17 (0.06)	0.000250335	0.16 (0.08)	-1.16667e-06	0.12 (0.03)	5.69792e-05
NGFR	P355	0.00132309	0.33 (0.04)	0.000376167	0.07 (0.02)	0.00238425	0.54 (0.12)	0.00171629	0.16 (0.18)	0.000161	0.12 (0.03)	0.00154845	0.26 (0.08)	0.000483148	0.6 (0.07)	0.0035324	0.42 (0.1)	0.00135711	0.36 (0.11)	0.000615766	0.32 (0.05)	0.000284333	0.28 (0.06)	0.000907412
NID1	P677	0.0021292	0.92 (0.02)	0.000416167	0.97 (0)	0.00945919	0.94 (0.01)	0.00133932	0.65 (0.07)	0.000647	0.93 (0.02)	0.000330871	0.8 (0.1)	0.00158692	0.88 (0.05)	0.0010784	0.57 (0.16)	0.00249667	0.92 (0.02)	0.000646328	0.94 (0.01)	0.000506167	0.91 (0.03)	0.0012083
NID1	P714	0.000233088	0.93 (0.02)	-2.08333e-05	0.96 (0.01)	0.00110295	0.94 (0.01)	0.000133937	0.82 (0.09)	0.000143	0.93 (0.02)	0.000118136	0.89 (0.04)	0.00019522	0.91 (0.02)	0.000461133	0.91 (0.03)	4.2888e-05	0.94 (0.01)	-2.7632e-06	0.94 (0.01)	7.83333e-05	0.93 (0.02)	4.08692e-05
NKX3-1	P146	1.34508e-05	0.05 (0.01)	1.95e-05	0.04 (0.01)	2.15903e-05	0.04 (0.01)	5.97619e-06	0.04 (0)	8e-05	0.05 (0.02)	-3.29973e-07	0.05 (0.01)	1.08524e-05	0.06 (0.01)	-4.67667e-05	0.09 (0.05)	7.87758e-06	0.07 (0.02)	4.98454e-05	0.06 (0.01)	-1.25e-05	0.06 (0.02)	1.59113e-05
NKX3-1	P871	0.000352819	0.95 (0.01)	0.000402167	0.96 (0.01)	4.50524e-05	0.93 (0.01)	0.000875959	0.96 (0.01)	7.6e-05	0.94 (0.02)	4.55266e-05	0.94 (0.01)	0.000541081	0.95 (0.01)	0.000760067	0.93 (0.03)	0.000149428	0.97 (0.01)	0.00248989	0.96 (0)	0.000222333	0.96 (0.01)	4.54225e-05
NNAT	P544	0.000363722	0.86 (0.04)	-5.33333e-06	0.88 (0.04)	1.3988e-05	0.85 (0.04)	0.000203298	0.85 (0.08)	-5.1e-05	0.82 (0.05)	0.00105202	0.92 (0.02)	0.000400801	0.89 (0.04)	-0.000109533	0.91 (0.04)	0.000113849	0.91 (0.01)	0.000245557	0.91 (0.02)	4.06667e-05	0.91 (0.02)	0.000188143
NOS2A	E117	0.000232405	0.9 (0.02)	0.000242	0.94 (0.02)	3.37325e-05	0.95 (0.01)	0.00251496	0.79 (0.07)	0.000292	0.91 (0.02)	2.91503e-05	0.9 (0.03)	0.000244782	0.9 (0.02)	0.000473033	0.84 (0.04)	0.000235007	0.91 (0.04)	-2.68529e-05	0.83 (0.12)	0.000138	0.91 (0.02)	0.000133866
NOS2A	P288	7.5163e-05	0.63 (0.12)	0.000297333	0.89 (0.02)	0.000144359	0.83 (0.09)	0.000139558	0.48 (0.26)	0.000115	0.84 (0.05)	1.86567e-05	0.72 (0.1)	0.00010571	0.73 (0.05)	0.0002131	0.82 (0.08)	7.28778e-06	0.78 (0.05)	3.38449e-05	0.64 (0.2)	5.88333e-05	0.75 (0.07)	7.43184e-05
NOS3	P38	0.000218364	0.88 (0.03)	-6.33333e-06	0.86 (0.08)	1.00709e-05	0.91 (0.02)	0.00144909	0.59 (0.16)	0.000219	0.89 (0.03)	9.36649e-05	0.72 (0.1)	0.00124152	0.86 (0.04)	0.000178533	0.6 (0.07)	0.000401635	0.84 (0.07)	-1.88083e-06	0.82 (0.11)	-6.7e-05	0.83 (0.07)	7.69493e-05
NOTCH1	E452	4.50676e-05	0.05 (0.02)	-6.43333e-05	0.04 (0.01)	9.57632e-06	0.05 (0.01)	7.61111e-07	0.04 (0)	4.1e-05	0.05 (0.03)	1.28413e-06	0.06 (0.01)	0.0001267	0.05 (0.01)	1.31333e-05	0.05 (0.03)	-2.06025e-06	0.04 (0.02)	-1.04574e-05	0.06 (0.02)	2.26667e-05	0.04 (0.01)	0.000160155
NOTCH1	P1198	0.000401412	0.08 (0.03)	5.2e-05	0.07 (0.03)	4.68199e-05	0.12 (0.06)	0.000136429	0.04 (0)	0.000211	0.19 (0.09)	7.99306e-05	0.05 (0.02)	0.000581918	0.1 (0.01)	0.000305533	0.38 (0.14)	0.00255101	0.09 (0.03)	0.0002207	0.09 (0.02)	0.000120333	0.08 (0.02)	0.00032586
NOTCH2	P312	0.000355364	0.03 (0)	0.0001865	0.01 (0)	0.000445139	0.02 (0)	0.000220684	0.04 (0.01)	0.000103	0.01 (0)	0.000156031	0.02 (0)	0.00018284	0.03 (0.01)	6.84e-05	0.03 (0.01)	0.00012536	0.03 (0)	-0.00017923	0.03 (0.01)	9.9e-05	0.03 (0.01)	0.000957705
NOTCH3	E403	3.14347e-05	0.08 (0.06)	-8.1e-05	0.07 (0.03)	3.24558e-06	0.06 (0.02)	5.17714e-05	0.02 (0.01)	0.000186	0.08 (0.05)	-8.61957e-07	0.11 (0.07)	2.83643e-05	0.08 (0.03)	-2.20333e-05	0.04 (0.03)	2.24989e-05	0.1 (0.03)	3.58231e-05	0.1 (0.04)	-4.31667e-05	0.1 (0.03)	9.51769e-05
NOTCH3	P198	0.000102946	0.5 (0.02)	0.000186	0.24 (0.09)	1.74324e-05	0.23 (0.15)	0.000113337	0.6 (0.11)	8.7e-05	0.34 (0.1)	8.01326e-06	0.16 (0.11)	0.000963345	0.44 (0.09)	-1.84333e-05	0.56 (0.11)	3.45223e-05	0.53 (0.06)	0.000222589	0.5 (0.06)	0.000108333	0.47 (0.09)	4.45394e-05
NOTCH4	E4	0.000175612	0.42 (0.16)	-8.66667e-05	0.18 (0.06)	6.43519e-05	0.7 (0.16)	0.000419751	0.31 (0.17)	-8e-06	0.17 (0.08)	0.000104803	0.3 (0.14)	9.43556e-05	0.75 (0.09)	0.00159047	0.7 (0.21)	0.000149423	0.44 (0.17)	1.95873e-05	0.54 (0.17)	2.05e-05	0.37 (0.11)	0.000223823
NOTCH4	P938	3.30793e-05	0.82 (0.05)	-1.91667e-05	0.84 (0.03)	7.07054e-06	0.83 (0.05)	1.77651e-05	0.88 (0.06)	3.4e-05	0.84 (0.04)	1.26481e-05	0.83 (0.07)	-3.74603e-07	0.83 (0.05)	-4e-07	0.62 (0.14)	0.000244017	0.82 (0.07)	1.37869e-06	0.82 (0.05)	-1.76667e-05	0.84 (0.04)	1.8853e-05
NPR2	P1093	0.000191129	0.82 (0.04)	3.96667e-05	0.9 (0.03)	4.34752e-05	0.63 (0.11)	0.0010866	0.63 (0.21)	0.000121	0.9 (0.02)	3.82098e-05	0.73 (0.09)	0.000466617	0.72 (0.09)	0.0010537	0.9 (0.09)	0.00027249	0.86 (0.02)	0.000218941	0.88 (0.05)	-2.78333e-05	0.87 (0.03)	7.68081e-05
NPR2	P618	9.23101e-05	0.13 (0.04)	-3.35e-05	0.19 (0.1)	4.54616e-05	0.05 (0.02)	0.000374106	0.08 (0.07)	5.5e-05	0.17 (0.06)	1.72742e-05	0.08 (0.05)	0.000100055	0.09 (0.03)	1.73667e-05	0.06 (0.02)	0.00030202	0.13 (0.04)	4.21438e-05	0.21 (0.16)	-1.26667e-05	0.14 (0.05)	9.03371e-05
NPY	E31	0.000422824	0.43 (0.05)	0.0001525	0.17 (0.05)	0.000384194	0.21 (0.14)	0.000407208	0.42 (0.06)	9e-06	0.37 (0.07)	0.000102521	0.2 (0.08)	0.000940421	0.63 (0.11)	0.000941867	0.78 (0.06)	0.00149802	0.45 (0.11)	-9.83687e-05	0.42 (0.04)	0.000173667	0.43 (0.09)	0.000475241
NPY	P295	0.000668357	0.13 (0.06)	0.000230667	0.08 (0.05)	3.14262e-05	0.15 (0.17)	0.000324083	0.07 (0.01)	0.000149	0.08 (0.04)	6.88677e-05	0.16 (0.06)	0.000442439	0.79 (0.1)	0.00379013	0.93 (0.03)	0.00465045	0.21 (0.19)	0.000177505	0.19 (0.14)	0.000112	0.14 (0.06)	0.000420522
NPY	P91	0.000561044	0.06 (0.03)	0.000158333	0.03 (0.01)	0.000103061	0.06 (0.1)	0.000143529	0.04 (0)	0.000137	0.05 (0.02)	3.89002e-05	0.04 (0.01)	0.00040673	0.2 (0.08)	0.00514483	0.43 (0.1)	0.00296773	0.07 (0.01)	0.000356168	0.05 (0.01)	0.000188167	0.06 (0.01)	0.000377028
NQO1	E74	0.000316091	0.04 (0.01)	2.08333e-05	0.03 (0)	0.0011926	0.04 (0.01)	0.000274979	0.04 (0.01)	4.4e-05	0.04 (0.01)	2.56343e-06	0.04 (0.01)	0.000264421	0.06 (0.02)	0.000346467	0.05 (0.01)	0.000291557	0.05 (0.01)	0.000168392	0.04 (0.01)	1.6e-05	0.05 (0.01)	0.000268593
NQO1	P345	0.0012537	0.06 (0.03)	0.000203	0.03 (0.01)	6.73841e-05	0.03 (0.01)	0.00059789	0.05 (0.05)	4.6e-05	0.05 (0.02)	3.02681e-05	0.03 (0.01)	0.000615006	0.04 (0.01)	0.000388833	0.7 (0.12)	0.0116731	0.06 (0.03)	0.000411184	0.07 (0.07)	0.000162667	0.05 (0.02)	0.000627688
NR2F6	E375	2.3797e-05	0.08 (0.02)	-5.5e-05	0.09 (0.02)	7.32877e-06	0.1 (0.02)	1.86635e-05	0.05 (0.01)	0.000106	0.06 (0.01)	3.36204e-05	0.09 (0.02)	5.98571e-06	0.07 (0.03)	1.29e-05	0.09 (0.04)	1.93849e-06	0.09 (0.02)	3.9824e-05	0.09 (0.01)	3.4e-05	0.08 (0.01)	2.97151e-05
NRAS	P103	7.23502e-05	0.05 (0.02)	-2.61667e-05	0.02 (0.02)	0.000134132	0.03 (0.02)	3.36325e-05	0.03 (0)	4.8e-05	0.05 (0.03)	2.66326e-05	0.04 (0.01)	1.44635e-05	0.06 (0.02)	2.91333e-05	0.07 (0.03)	2.44677e-05	0.05 (0.01)	-4.60734e-05	0.05 (0.01)	1.1e-05	0.04 (0.01)	0.000180265
NRAS	P12	4.53875e-05	0.04 (0.01)	1.61667e-05	0.04 (0.02)	8.60598e-06	0.04 (0.01)	5.89183e-05	0.03 (0.01)	1.6e-05	0.08 (0.06)	7.76977e-06	0.07 (0.02)	0.000281305	0.05 (0.02)	0.0001317	0.04 (0.02)	-8.98196e-07	0.04 (0.01)	3.15517e-05	0.04 (0.01)	6.51667e-05	0.04 (0.01)	5.83489e-05
NRG1	E74	8.30213e-05	0.07 (0.04)	-8.98333e-05	0.06 (0.02)	1.74943e-06	0.05 (0.02)	2.68198e-05	0.03 (0.01)	0.000132	0.05 (0.02)	3.15356e-07	0.06 (0.03)	-1.37429e-05	0.06 (0.02)	-4.20333e-05	0.13 (0.09)	7.82194e-06	0.09 (0.03)	7.30915e-05	0.06 (0.03)	7.88333e-05	0.07 (0.02)	0.000305549
NRG1	P558	0.000245223	0.07 (0.03)	1.76667e-05	0.08 (0.04)	8.20289e-06	0.03 (0.02)	0.000246695	0.03 (0.01)	0.000108	0.06 (0.02)	3.32211e-05	0.07 (0.06)	9.96508e-05	0.05 (0.02)	0.0001073	0.46 (0.19)	0.00202255	0.08 (0.03)	5.23907e-05	0.08 (0.03)	7.16667e-06	0.08 (0.03)	9.07889e-05
NTRK1	E74	0.000203532	0.75 (0.34)	-0.000111833	0.79 (0.24)	5.04222e-05	0.73 (0.28)	3.33143e-05	0.4 (0.48)	-3.8e-05	0.49 (0.39)	2.16546e-05	0.65 (0.24)	7.57373e-05	0.62 (0.4)	-6.96e-05	0.66 (0.36)	1.31587e-06	0.4 (0.37)	0.000266916	0.46 (0.43)	-9.73333e-05	0.59 (0.35)	0.000718715
NTRK2	P10	0.000244143	0.05 (0.01)	-4.55e-05	0.03 (0.01)	2.67059e-05	0.03 (0.01)	0.00049526	0.04 (0)	1.3e-05	0.04 (0.02)	1.03438e-05	0.07 (0.06)	-8.67595e-05	0.05 (0.01)	5.06e-05	0.04 (0.01)	1.42062e-05	0.06 (0.03)	-0.000294997	0.09 (0.06)	0.000107667	0.06 (0.02)	0.000973891
NTRK2	P395	3.99357e-05	0.05 (0.01)	-1.16667e-05	0.03 (0.01)	1.84123e-06	0.13 (0.23)	-1.44048e-06	0.04 (0.02)	3e-06	0.02 (0.01)	2.94165e-05	0.05 (0.03)	9.85556e-06	0.03 (0.01)	1.15333e-05	0.05 (0.05)	-2.07626e-06	0.09 (0.06)	0.000328591	0.05 (0.02)	-4.1e-05	0.05 (0.02)	2.45389e-05
NTRK3	E131	7.5354e-05	0.03 (0.01)	8e-06	0.02 (0)	0.00017627	0.02 (0.01)	0.000335701	0.07 (0.06)	3.9e-05	0.02 (0.01)	1.24975e-05	0.03 (0.01)	0.000179331	0.04 (0.02)	8.62e-05	0.05 (0.03)	3.25164e-05	0.04 (0.01)	6.93716e-05	0.05 (0.04)	1.16667e-06	0.03 (0.02)	3.01969e-05
NTRK3	P636	2.22515e-05	0.08 (0.06)	-6.23333e-05	0.03 (0.02)	1.23776e-05	0.03 (0.02)	0.000107777	0.03 (0.01)	7e-05	0.05 (0.04)	-8.23212e-07	0.05 (0.02)	1.37063e-06	0.08 (0.04)	-1.52667e-05	0.08 (0.05)	3.0303e-07	0.1 (0.03)	0.00019199	0.13 (0.13)	2.83333e-05	0.08 (0.04)	-6.47475e-06
NTRK3	P752	2.98679e-05	0.05 (0.02)	4.35e-05	0.03 (0.01)	1.33267e-05	0.03 (0.02)	1.87484e-05	0.08 (0.09)	2e-06	0.04 (0.02)	5.49108e-07	0.05 (0.03)	4.91508e-06	0.07 (0.02)	8.63667e-05	0.11 (0.08)	9.14013e-06	0.05 (0.02)	-3.60394e-05	0.09 (0.09)	-3.2e-05	0.05 (0.02)	0.000100883
NTSR1	E109	6.61159e-05	0.09 (0.03)	-2.55e-05	0.04 (0.01)	6.56212e-05	0.05 (0.02)	4.69238e-05	0.04 (0)	0.000126	0.07 (0.03)	4.96249e-07	0.04 (0.02)	0.000142504	0.07 (0.02)	3.57333e-05	0.13 (0.09)	-3.75541e-07	0.11 (0.03)	0.000392914	0.09 (0.03)	-8.68333e-05	0.08 (0.02)	5.99344e-05
NTSR1	P318	0.00023273	0.09 (0.02)	0.000323167	0.04 (0.02)	3.11407e-05	0.04 (0.01)	0.00141037	0.05 (0.01)	5.7e-05	0.05 (0.02)	5.2446e-05	0.12 (0.06)	0.000671784	0.09 (0.06)	3.83667e-05	0.35 (0.14)	0.000708869	0.08 (0.02)	6.38771e-05	0.12 (0.1)	2.45e-05	0.09 (0.08)	0.000110484
OAT	P465	0.000725001	0.33 (0.05)	0.000228167	0.1 (0.03)	0.00176551	0.12 (0.12)	0.000286055	0.19 (0.04)	0.000145	0.22 (0.06)	0.000509164	0.06 (0.02)	0.0039165	0.26 (0.04)	0.0003462	0.4 (0.12)	0.000114883	0.35 (0.08)	0.000206832	0.32 (0.03)	0.000219333	0.32 (0.06)	0.000413815
ODC1	P424	4.6148e-05	0.03 (0.01)	4.16667e-06	0.02 (0.01)	9.01001e-05	0.02 (0.01)	2.6446e-05	0.06 (0.07)	-3.5e-05	0.05 (0.03)	6.01772e-05	0.02 (0.01)	3.31881e-05	0.04 (0.01)	-2.69667e-05	0.04 (0.03)	-8.88167e-08	0.03 (0.01)	-2.43825e-05	0.03 (0.01)	-5.66667e-06	0.03 (0.01)	7.44312e-05
OGG1	E400	0.00069813	0.33 (0.15)	-0.000316167	0.57 (0.1)	0.000128812	0.09 (0.05)	0.00332216	0.25 (0.27)	7.9e-05	0.53 (0.08)	0.000227682	0.2 (0.12)	0.000210617	0.19 (0.1)	0.000397833	0.07 (0.05)	0.0026261	0.38 (0.11)	0.000330732	0.35 (0.05)	0.000196333	0.39 (0.11)	0.000700262
ONECUT2	E96	0.000133072	0.13 (0.03)	2.46667e-05	0.08 (0.05)	8.42838e-06	0.11 (0.17)	5.14429e-05	0.08 (0.02)	-3.4e-05	0.08 (0.03)	2.3609e-05	0.15 (0.08)	1.2319e-05	0.13 (0.04)	5.59e-05	0.45 (0.33)	2.6547e-05	0.14 (0.03)	0.000180963	0.09 (0.03)	2.8e-05	0.14 (0.05)	0.000421714
ONECUT2	P315	7.59991e-05	0.04 (0.01)	4.11667e-05	0.03 (0.02)	1.79717e-05	0.04 (0.03)	7.48968e-05	0.04 (0)	8.7e-05	0.04 (0.02)	3.75692e-06	0.06 (0.05)	-5.43651e-07	0.06 (0.02)	-6.56e-05	0.21 (0.19)	1.60273e-05	0.07 (0.03)	0.000301018	0.05 (0.01)	-5.61667e-05	0.06 (0.01)	0.000179476
OPCML	E219	0.000839906	0.09 (0.05)	8.55e-05	0.03 (0.01)	0.000157977	0.05 (0.01)	0.000720668	0.04 (0.01)	0.000122	0.07 (0.02)	5.41047e-05	0.11 (0.08)	0.000149033	0.09 (0.04)	0.000165367	0.56 (0.14)	0.00717062	0.16 (0.1)	0.000504215	0.12 (0.05)	0.000152333	0.09 (0.03)	0.000415121
OPCML	P71	6.8777e-05	0.2 (0.03)	7.66667e-06	0.12 (0.07)	3.46007e-05	0.1 (0.04)	0.000277702	0.04 (0.01)	0.000243	0.21 (0.05)	4.78208e-05	0.17 (0.06)	1.65921e-05	0.23 (0.07)	-1.19667e-05	0.38 (0.13)	5.68489e-05	0.29 (0.09)	9.81645e-05	0.27 (0.05)	0.000113833	0.23 (0.06)	5.25385e-05
OSM	P188	0.00648301	0.88 (0.04)	0.001302	0.03 (0.01)	0.0103361	0.93 (0.04)	0.00502772	0.81 (0.16)	0.000552	0.03 (0.01)	0.00854349	0.86 (0.11)	0.00468234	0.94 (0.02)	0.0030216	0.95 (0.02)	0.00616807	0.88 (0.07)	0.00316295	0.86 (0.06)	0.00123917	0.86 (0.06)	0.00601238
OSM	P34	0.00745268	0.77 (0.06)	0.00132	0.02 (0)	0.0177446	0.82 (0.07)	0.00502237	0.65 (0.08)	0.00068	0.1 (0.03)	0.0091076	0.71 (0.13)	0.00457225	0.85 (0.06)	0.00278807	0.87 (0.07)	0.00605611	0.74 (0.14)	0.00308065	0.73 (0.03)	0.001337	0.71 (0.1)	0.00546577
p16	S188	4.73093e-05	0.06 (0.02)	9.73333e-05	0.02 (0.01)	3.49704e-05	0.03 (0.02)	3.76024e-05	0.03 (0)	6.8e-05	0.03 (0.01)	1.66361e-05	0.04 (0.02)	-1.04206e-05	0.04 (0.01)	-5.54e-05	0.04 (0.02)	2.04523e-07	0.05 (0.02)	3.19893e-05	0.03 (0.01)	7.35e-05	0.05 (0.01)	0.000119606
p16	S85	0.000502731	0.73 (0.09)	8.23333e-05	0.38 (0.07)	0.000914157	0.51 (0.11)	4.22492e-05	0.76 (0.13)	5e-05	0.65 (0.07)	0.000341541	0.4 (0.07)	0.00181067	0.69 (0.13)	-0.0001091	0.72 (0.12)	1.03379e-05	0.7 (0.1)	-0.000237041	0.75 (0.03)	0.000221667	0.7 (0.07)	0.000877534
P2RX7	E323	0.000877836	0.16 (0.03)	9.11667e-05	0.05 (0.02)	0.000295087	0.07 (0.03)	0.000701078	0.16 (0.04)	5e-06	0.16 (0.05)	7.32401e-05	0.07 (0.02)	0.00164313	0.13 (0.05)	0.000228933	0.57 (0.16)	0.00414391	0.22 (0.06)	0.00102397	0.17 (0.04)	8.18333e-05	0.15 (0.04)	0.000934478
P2RX7	P119	1.90649e-05	0.14 (0.1)	-1.36667e-05	0.19 (0.08)	6.39018e-05	0.09 (0.03)	0.000124652	0.12 (0.14)	6.3e-05	0.17 (0.05)	3.30595e-06	0.18 (0.06)	3.81405e-05	0.12 (0.06)	1.08333e-05	0.16 (0.07)	-3.40014e-06	0.16 (0.05)	-1.95382e-06	0.17 (0.08)	-5.55e-05	0.15 (0.06)	8.23193e-06
P2RX7	P597	0.000738234	0.92 (0.03)	6.98333e-05	0.97 (0)	0.000878445	0.81 (0.12)	9.4881e-06	0.94 (0.01)	6.5e-05	0.95 (0.01)	6.56154e-05	0.93 (0.02)	0.000547816	0.86 (0.05)	0.000566767	0.49 (0.12)	0.00519686	0.92 (0.03)	0.000172556	0.91 (0.05)	0.000102167	0.91 (0.03)	0.000389664
PADI4	E24	0.00465943	0.87 (0.04)	0.0009295	0.33 (0.12)	0.00687314	0.92 (0.03)	0.00371285	0.91 (0.06)	0.000568	0.36 (0.12)	0.00669241	0.89 (0.08)	0.00306417	0.92 (0.02)	0.00245593	0.94 (0.02)	0.00460081	0.85 (0.13)	0.000942579	0.87 (0.05)	0.000816	0.86 (0.05)	0.00444004
PADI4	P1011	0.000132978	0.72 (0.06)	4.08333e-05	0.79 (0.03)	4.94358e-05	0.8 (0.06)	0.000345429	0.62 (0.16)	-4.6e-05	0.78 (0.03)	6.63804e-05	0.57 (0.11)	0.000523456	0.78 (0.05)	0.00011	0.8 (0.05)	5.32585e-05	0.65 (0.07)	0.000371591	0.63 (0.17)	0.00011	0.67 (0.07)	8.79257e-05
PADI4	P1158	0.000244983	0.56 (0.12)	3.95e-05	0.76 (0.04)	0.000219052	0.46 (0.1)	0.000280141	0.54 (0.08)	1.3e-05	0.79 (0.04)	0.000227594	0.27 (0.16)	0.00139803	0.6 (0.13)	-1.58333e-05	0.82 (0.09)	0.000283464	0.57 (0.09)	0.000155603	0.6 (0.2)	-2.01667e-05	0.59 (0.1)	0.00013019
PALM2-AKAP2	P183	3.46301e-05	0.1 (0.02)	5.66667e-06	0.07 (0.03)	1.53144e-06	0.07 (0.06)	3.74224e-05	0.05 (0)	0.000138	0.07 (0.02)	5.17374e-06	0.08 (0.04)	3.02063e-06	0.08 (0.02)	3.94333e-05	0.1 (0.03)	6.89942e-06	0.11 (0.03)	0.00014275	0.08 (0.01)	4.36667e-05	0.09 (0.02)	5.58862e-05
PALM2-AKAP2	P420	4.42968e-05	0.14 (0.02)	0.000300167	0.06 (0.02)	5.30762e-06	0.07 (0.14)	0.000271263	0.05 (0)	0.000112	0.09 (0.03)	2.84232e-06	0.11 (0.09)	-7.0381e-06	0.1 (0.03)	1.75333e-05	0.1 (0.05)	-7.68831e-07	0.12 (0.03)	-1.2248e-05	0.11 (0.03)	-2.36667e-05	0.12 (0.04)	7.74304e-05
PARP1	P610	0.000269636	0.75 (0.09)	-6.1e-05	0.89 (0.06)	5.61102e-05	0.82 (0.05)	0.00019416	0.85 (0.11)	3.8e-05	0.79 (0.07)	3.03611e-05	0.78 (0.11)	-0.000134961	0.75 (0.07)	3.75333e-05	0.52 (0.1)	0.00216178	0.81 (0.04)	0.000131126	0.77 (0.08)	-2.16667e-06	0.82 (0.05)	0.000205924
PAX6	E129	0.00074132	0.1 (0.01)	0.000441167	0.02 (0.01)	0.000795781	0.04 (0.03)	0.00137877	0.13 (0.08)	-0.000271	0.09 (0.03)	0.000170463	0.05 (0.02)	0.00164834	0.11 (0.04)	-0.000337533	0.2 (0.1)	9.2399e-05	0.22 (0.12)	0.00381635	0.1 (0.01)	0.000392833	0.14 (0.03)	0.000477565
PAX6	P1121	0.000812862	0.07 (0.02)	5.33333e-05	0.03 (0.01)	0.000133049	0.04 (0.01)	0.000449933	0.1 (0.06)	4.3e-05	0.04 (0.01)	5.79995e-05	0.06 (0.03)	0.000371017	0.08 (0.04)	0.0002082	0.54 (0.12)	0.00712097	0.09 (0.07)	1.27124e-05	0.06 (0.01)	0.000128167	0.05 (0.01)	0.000506176
PAX6	P50	0.00011426	0.07 (0.04)	-3.63333e-05	0.03 (0.02)	3.83233e-05	0.03 (0.01)	0.000935345	0.06 (0.03)	-6.2e-05	0.05 (0.02)	2.79174e-05	0.08 (0.04)	0.000120379	0.08 (0.04)	7.73333e-06	0.23 (0.21)	5.75507e-06	0.15 (0.16)	0.000344655	0.06 (0.02)	3.33333e-06	0.08 (0.03)	8.41168e-05
PCDH1	E22	0.000575647	0.05 (0.01)	0.000287833	0.02 (0)	0.00032076	0.03 (0.01)	0.000709806	0.07 (0.05)	0.000102	0.03 (0.01)	2.62588e-05	0.03 (0)	0.00267241	0.05 (0.01)	0.000547567	0.08 (0.04)	0.000285515	0.07 (0.02)	0.000919259	0.05 (0.01)	0.000312833	0.05 (0.01)	0.00091446
PCDH1	P264	6.49338e-06	0.13 (0.11)	-2.66667e-05	0.12 (0.09)	4.60419e-06	0.14 (0.08)	5.39683e-06	0.11 (0.06)	-1.70068e-22	0.14 (0.08)	3.36525e-06	0.16 (0.06)	2.17778e-05	0.11 (0.06)	-2.21667e-05	0.23 (0.14)	1.08038e-06	0.21 (0.14)	-3.20901e-07	0.13 (0.1)	-2.71667e-05	0.19 (0.13)	2.05734e-05
PCGF4	P760	0.000396113	0.2 (0.04)	6.18333e-05	0.05 (0.04)	0.000340459	0.06 (0.06)	0.000531392	0.12 (0.1)	-0.000172	0.21 (0.05)	0.000101023	0.05 (0.02)	0.00167575	0.17 (0.05)	-1.86333e-05	0.28 (0.08)	0.000168656	0.25 (0.06)	0.000963149	0.16 (0.01)	0.000323833	0.18 (0.04)	0.000447312
PCGF4	P92	0.000240775	0.09 (0.05)	-0.000141667	0.04 (0.01)	0.000106021	0.06 (0.05)	8.59516e-05	0.04 (0.01)	0.00022	0.16 (0.09)	2.43e-05	0.05 (0.01)	0.000442243	0.1 (0.04)	-1.40333e-05	0.11 (0.08)	9.41489e-06	0.11 (0.04)	3.70392e-05	0.1 (0.03)	-3.35e-05	0.11 (0.02)	0.00079119
PDE1B	E141	0.000255787	0.11 (0.02)	0.0001445	0.12 (0.04)	6.56111e-06	0.06 (0.03)	0.000362283	0.05 (0.01)	0.0003	0.12 (0.02)	3.26666e-05	0.1 (0.03)	-1.50722e-05	0.11 (0.03)	3.64333e-05	0.14 (0.05)	-9.96486e-06	0.16 (0.04)	0.00135096	0.15 (0.03)	4.53333e-05	0.13 (0.02)	0.000434255
PDE1B	P263	0.000125883	0.05 (0.01)	-8.01667e-05	0.02 (0)	0.000337016	0.06 (0.09)	-1.60548e-05	0.06 (0.04)	-3.6e-05	0.04 (0.02)	1.04628e-05	0.03 (0.01)	4.28794e-05	0.06 (0.02)	6.9e-06	0.05 (0.02)	1.32243e-05	0.07 (0.02)	0.000560828	0.06 (0.02)	1.58392e-20	0.05 (0.01)	0.000157549
PDGFA	P78	2.90384e-05	0.2 (0.07)	-5.11667e-05	0.23 (0.04)	1.31222e-05	0.18 (0.04)	1.49579e-05	0.21 (0.08)	9e-06	0.16 (0.03)	5.57032e-05	0.21 (0.03)	1.51913e-05	0.21 (0.07)	-7.36667e-06	0.27 (0.07)	9.68968e-06	0.26 (0.06)	1.77979e-05	0.19 (0.02)	3.28333e-05	0.23 (0.04)	4.17521e-05
PDGFA	P841	0.000213155	0.04 (0.02)	-6.7e-05	0.01 (0)	0.000314323	0.02 (0.01)	0.000231454	0.03 (0.01)	-3.3e-05	0.03 (0.01)	1.50432e-06	0.02 (0)	0.000814926	0.04 (0.01)	0.000254767	0.04 (0.02)	3.8521e-05	0.04 (0.01)	0.000323066	0.03 (0.01)	6.56667e-05	0.03 (0.01)	0.000320279
PDGFB	E25	7.05418e-05	0.35 (0.04)	6.05e-05	0.19 (0.06)	2.53275e-05	0.17 (0.09)	0.000166827	0.06 (0.01)	0.000325	0.31 (0.09)	3.10179e-06	0.19 (0.06)	0.00032437	0.39 (0.07)	0.000158133	0.34 (0.12)	3.04663e-06	0.36 (0.07)	3.85422e-05	0.33 (0.04)	6.33333e-06	0.34 (0.06)	0.000106755
PDGFB	P719	0.000103935	0.75 (0.05)	0.0001145	0.72 (0.09)	7.98552e-06	0.74 (0.07)	5.01413e-05	0.88 (0.06)	0.00014	0.75 (0.06)	4.31726e-05	0.82 (0.06)	2.30595e-05	0.85 (0.03)	0.000557	0.88 (0.05)	0.00034811	0.8 (0.05)	1.98214e-05	0.7 (0.1)	3.63333e-05	0.77 (0.05)	0.000130377
PDGFRA	E125	8.76985e-05	0.56 (0.21)	5.71667e-05	0.39 (0.08)	1.09024e-05	0.41 (0.14)	5.22778e-06	0.42 (0.31)	-3.4e-05	0.27 (0.09)	0.000127863	0.62 (0.18)	0.000101352	0.46 (0.11)	-4.30333e-05	0.68 (0.2)	9.73947e-05	0.5 (0.15)	-2.26446e-05	0.46 (0.13)	-1.3e-05	0.45 (0.08)	0.000169485
PDGFRA	P1429	3.39974e-05	0.06 (0.01)	3.18333e-05	0.05 (0.01)	2.4124e-05	0.05 (0.01)	3.76611e-05	0.03 (0.01)	0.000128	0.03 (0.02)	2.47165e-05	0.08 (0.02)	5.47857e-05	0.08 (0.05)	-2.78667e-05	0.28 (0.19)	0.000101926	0.11 (0.16)	6.44495e-06	0.07 (0.04)	-7.76667e-05	0.08 (0.05)	2.77509e-05
PDGFRB	E195	0.00131656	0.13 (0.05)	0.0001955	0.07 (0.02)	0.00202456	0.15 (0.06)	0.000454659	0.18 (0.13)	2e-06	0.22 (0.05)	0.00085678	0.09 (0.04)	0.000586328	0.31 (0.12)	0.000656167	0.82 (0.07)	0.00689715	0.15 (0.03)	0.000370685	0.43 (0.31)	1.23333e-05	0.14 (0.05)	0.000573585
PDGFRB	P273	0.00109212	0.48 (0.1)	2.03333e-05	0.17 (0.03)	0.00149673	0.32 (0.12)	0.000510053	0.26 (0.09)	0.000146	0.46 (0.09)	0.000315215	0.27 (0.07)	0.000800183	0.67 (0.07)	0.00100213	0.85 (0.04)	0.00675229	0.53 (0.05)	0.000336004	0.67 (0.15)	4.95e-05	0.5 (0.09)	0.000516741
PDGFRB	P343	0.000843445	0.04 (0.03)	3.81667e-05	0.02 (0.01)	5.18325e-05	0.04 (0.01)	0.000520305	0.02 (0)	0.000132	0.02 (0.01)	4.76236e-05	0.03 (0.01)	0.000444186	0.08 (0.04)	0.000579767	0.7 (0.12)	0.00702643	0.02 (0)	0.000424953	0.23 (0.24)	3.5e-05	0.03 (0.03)	0.000556336
PECAM1	E32	0.006241	0.76 (0.09)	0.00116167	0.28 (0.08)	0.00453088	0.83 (0.05)	0.0112703	0.85 (0.06)	0.002808	0.3 (0.09)	0.00280915	0.8 (0.13)	0.0113622	0.86 (0.02)	0.0114969	0.83 (0.07)	0.00991669	0.73 (0.07)	0.000869383	0.74 (0.14)	0.00228483	0.67 (0.07)	0.00953891
PECAM1	P135	0.00540677	0.78 (0.04)	0.00112783	0.33 (0.09)	0.00726499	0.86 (0.04)	0.00482839	0.81 (0.15)	0.00048	0.3 (0.09)	0.00764689	0.8 (0.1)	0.00313048	0.86 (0.02)	0.0042427	0.86 (0.05)	0.00545349	0.77 (0.06)	0.00246643	0.72 (0.07)	0.000926167	0.74 (0.06)	0.00500744
PEG10	P978	0.000352048	0.16 (0.06)	-5.81667e-05	0.15 (0.05)	1.46917e-05	0.07 (0.04)	0.000548921	0.07 (0.03)	0.000128	0.13 (0.04)	9.32711e-05	0.17 (0.08)	2.00833e-05	0.15 (0.05)	0.0001292	0.54 (0.1)	0.00234862	0.24 (0.06)	0.000430917	0.23 (0.15)	-4.6e-05	0.21 (0.05)	0.000217204
PEG3	E496	0.000310293	0.52 (0.07)	-6.01667e-05	0.52 (0.06)	1.39233e-05	0.59 (0.13)	0.00016231	0.27 (0.1)	0.000277	0.5 (0.05)	4.32172e-05	0.5 (0.08)	-2.0654e-05	0.54 (0.09)	0.000358533	0.53 (0.08)	5.97517e-05	0.37 (0.05)	0.00120724	0.58 (0.07)	0.0006755	0.39 (0.08)	0.000655525
			Bladder (n=5)		Blood (n=30)		Brain (n=12)		Cervix (n=3)		Infant blood (n=55)		Head and neck (n=11)		Kidney (n=6)		Placenta (n=19)		Pleura (n=18)		Small intestine (n=5)		Lung (n=53)
GENE	CpG	Mean decrease in accuracy	Mean (sd)	Decrease in accuracy	Mean (sd)	Decrease in accuracy	Mean (sd)	Decrease in accuracy	Mean (sd)	Decrease in accuracy	Mean (sd)	Decrease in accuracy	Mean (sd)	Decrease in accuracy	Mean (sd)	Decrease in accuracy	Mean (sd)	Decrease in accuracy	Mean (sd)	Decrease in accuracy	Mean (sd)	Decrease in accuracy	Mean (sd)	Decrease in accuracy
PENK	E26	0.000253952	0.24 (0.04)	0.0002115	0.15 (0.05)	8.73546e-05	0.16 (0.18)	0.000268898	0.22 (0.09)	3.1e-05	0.28 (0.04)	3.56336e-05	0.22 (0.14)	6.51706e-05	0.25 (0.04)	0.000472233	0.32 (0.08)	3.2671e-05	0.34 (0.06)	0.00178672	0.35 (0.19)	2.45e-05	0.26 (0.04)	0.000213614
PENK	P447	9.46512e-05	0.1 (0.04)	-1.03333e-05	0.12 (0.05)	9.65806e-06	0.09 (0.19)	0.000686195	0.03 (0)	0.000249	0.08 (0.04)	2.73162e-05	0.14 (0.12)	-4.06675e-05	0.12 (0.05)	4.02333e-05	0.34 (0.19)	3.02478e-05	0.18 (0.09)	6.38437e-05	0.29 (0.28)	9.66667e-06	0.14 (0.05)	0.000158112
PGF	E33	6.51648e-05	0.06 (0.02)	-5.9e-05	0.04 (0)	9.26891e-05	0.06 (0.01)	3.18738e-05	0.06 (0.01)	-6e-06	0.04 (0.01)	8.99562e-06	0.06 (0.01)	0.000248892	0.07 (0.01)	0.0002974	0.06 (0.01)	2.25985e-05	0.06 (0.01)	5.09117e-05	0.05 (0.01)	6.33333e-05	0.05 (0.01)	7.99529e-05
PGF	P320	9.3656e-05	0.17 (0.05)	0.000180333	0.34 (0.12)	5.43975e-06	0.14 (0.04)	0.00021441	0.34 (0.29)	-5.7e-05	0.37 (0.08)	0.000156164	0.2 (0.11)	5.44405e-05	0.17 (0.07)	0.000152167	0.11 (0.05)	0.000229695	0.27 (0.08)	-9.38654e-06	0.22 (0.04)	-3.16667e-05	0.27 (0.08)	4.63853e-05
PGR	E183	0.00126916	0.9 (0.01)	0.000225167	0.89 (0.03)	4.64809e-05	0.92 (0.02)	0.000703535	0.91 (0.04)	6.9e-05	0.88 (0.03)	3.77595e-05	0.89 (0.03)	0.000537137	0.9 (0.02)	0.000415867	0.45 (0.14)	0.0116355	0.89 (0.04)	0.000370781	0.91 (0.01)	0.000287667	0.87 (0.03)	0.000693779
PGR	P456	2.1915e-05	0.93 (0.01)	-1.66667e-06	0.92 (0.04)	-9.01076e-07	0.94 (0.01)	4.93143e-05	0.92 (0.04)	-3.5e-05	0.91 (0.02)	1.25474e-05	0.92 (0.01)	5.39286e-06	0.92 (0.02)	9.7e-06	0.83 (0.09)	0.000112703	0.93 (0.01)	6.9562e-05	0.93 (0.01)	1.22812e-21	0.92 (0.02)	-4.86267e-06
PGR	P790	0.000753735	0.75 (0.04)	0.000105	0.79 (0.08)	4.03478e-05	0.85 (0.06)	0.000931433	0.83 (0.07)	0.000113	0.68 (0.06)	3.8916e-05	0.8 (0.03)	0.000760848	0.73 (0.05)	0.000240833	0.39 (0.08)	0.00581946	0.66 (0.07)	0.00033346	0.73 (0.06)	0.000109833	0.7 (0.05)	0.000423856
PHLDA2	E159	0.000226316	0.1 (0.03)	5.16667e-05	0.05 (0.01)	0.000144521	0.06 (0.04)	0.00012093	0.06 (0.04)	-5.6e-05	0.08 (0.02)	2.11428e-05	0.05 (0.02)	0.000884341	0.1 (0.03)	-4.49e-05	0.16 (0.05)	9.3545e-05	0.12 (0.03)	0.000182691	0.11 (0.02)	0.000125	0.11 (0.02)	0.000506209
PHLDA2	P622	9.35463e-06	0.31 (0.04)	-2.33333e-06	0.41 (0.18)	-6.56923e-07	0.4 (0.13)	5.86905e-06	0.14 (0.08)	0.000156	0.34 (0.08)	2.39977e-08	0.28 (0.09)	1.28175e-06	0.3 (0.09)	-4.37667e-05	0.4 (0.16)	1.32078e-06	0.33 (0.04)	3.88021e-05	0.28 (0.04)	3.9e-05	0.3 (0.06)	1.74381e-05
PI3	E107	0.000303509	0.88 (0.03)	6.95e-05	0.73 (0.16)	3.36324e-05	0.94 (0.02)	0.000793044	0.66 (0.06)	0.000152	0.83 (0.11)	1.6087e-05	0.83 (0.09)	8.335e-05	0.91 (0.04)	0.000297167	0.27 (0.09)	0.00239693	0.78 (0.25)	-1.14979e-06	0.85 (0.05)	0.000108833	0.79 (0.17)	5.83529e-05
PI3	P1394	0.000431153	0.73 (0.08)	0.000127167	0.81 (0.13)	8.36622e-06	0.8 (0.05)	0.000252458	0.63 (0.22)	-0.000188	0.85 (0.03)	9.87173e-05	0.73 (0.08)	0.000192433	0.72 (0.06)	0.000244067	0.29 (0.13)	0.0035702	0.81 (0.05)	0.000145319	0.78 (0.05)	6.08333e-05	0.8 (0.05)	0.000204485
PI3	P274	0.000383007	0.94 (0.01)	0.000151833	0.84 (0.05)	5.14572e-05	0.97 (0.01)	0.00460178	0.83 (0.11)	8e-05	0.86 (0.04)	3.11422e-05	0.88 (0.05)	0.000269688	0.96 (0)	0.00179097	0.81 (0.06)	0.000248766	0.93 (0.03)	4.62424e-05	0.94 (0.01)	0.000154167	0.92 (0.02)	0.000150379
PIK3R1	P307	8.19818e-05	0.92 (0.02)	0.000109667	0.89 (0.02)	1.28742e-05	0.75 (0.12)	0.000361007	0.89 (0.08)	-7.9e-05	0.87 (0.03)	3.30957e-05	0.92 (0.03)	6.69127e-05	0.87 (0.03)	3.97e-05	0.91 (0.07)	2.45458e-05	0.92 (0.03)	0.000276304	0.82 (0.14)	-4.16667e-05	0.89 (0.03)	7.27567e-05
PITX2	E24	6.04432e-05	0.21 (0.07)	-2.36667e-05	0.23 (0.1)	3.48965e-06	0.13 (0.12)	0.000165669	0.36 (0.27)	-2.6e-05	0.16 (0.07)	4.38782e-05	0.31 (0.16)	-1.10135e-05	0.25 (0.11)	1e-06	0.27 (0.21)	-9.557e-07	0.32 (0.16)	3.73095e-05	0.27 (0.09)	-4.73333e-05	0.3 (0.08)	0.000162196
PITX2	P183	0.000212786	0.15 (0.04)	0.000225667	0.22 (0.08)	5.84047e-06	0.15 (0.04)	9.02516e-05	0.12 (0.12)	-1e-05	0.12 (0.04)	9.66023e-05	0.22 (0.1)	8.49524e-06	0.28 (0.05)	0.0006418	0.27 (0.09)	2.59818e-05	0.24 (0.06)	-0.000114119	0.14 (0.05)	8.7e-05	0.22 (0.05)	0.000676005
PKD2	P287	5.95168e-05	0.06 (0.03)	-2.85e-05	0.04 (0.01)	7.62764e-05	0.03 (0.01)	0.00018006	0.07 (0.05)	-1.2e-05	0.12 (0.05)	4.32506e-05	0.04 (0.01)	0.000139031	0.07 (0.02)	-2.17e-05	0.08 (0.04)	-1.84134e-06	0.09 (0.02)	0.000129889	0.07 (0.02)	2.86667e-05	0.07 (0.02)	4.75786e-05
PKD2	P336	0.000134655	0.07 (0.02)	-9.88333e-05	0.07 (0.02)	-3.32323e-07	0.04 (0.02)	0.000701606	0.06 (0.03)	2.7e-05	0.08 (0.01)	7.21353e-06	0.06 (0.02)	4.17746e-05	0.07 (0.03)	-7.98667e-05	0.08 (0.02)	3.80296e-06	0.12 (0.03)	0.000874183	0.09 (0.02)	-2.48333e-05	0.1 (0.02)	0.000114031
PLA2G2A	E268	5.29188e-05	0.72 (0.13)	0.0001845	0.76 (0.04)	9.44616e-06	0.83 (0.06)	0.000182455	0.91 (0.03)	0.000164	0.79 (0.06)	1.028e-06	0.69 (0.08)	0.000452788	0.82 (0.03)	0.000129267	0.81 (0.06)	3.41106e-06	0.8 (0.07)	-1.72e-05	0.8 (0.07)	-8e-05	0.81 (0.05)	4.42015e-05
PLA2G2A	P528	0.000333636	0.79 (0.04)	9.6e-05	0.77 (0.08)	1.5414e-05	0.88 (0.04)	0.00196228	0.82 (0.08)	-0.000144	0.82 (0.05)	2.6276e-05	0.74 (0.06)	0.000350255	0.79 (0.03)	0.0002591	0.62 (0.13)	0.000184318	0.85 (0.05)	0.00102044	0.71 (0.18)	0.000113833	0.81 (0.04)	0.000366645
PLAGL1	E68	9.80945e-05	0.8 (0.04)	-0.000106833	0.74 (0.04)	5.33029e-05	0.75 (0.05)	4.83071e-05	0.84 (0.02)	7.6e-05	0.73 (0.07)	3.62644e-05	0.75 (0.03)	0.000445049	0.81 (0.05)	-6.36667e-06	0.85 (0.05)	2.98956e-05	0.84 (0.04)	0.000109668	0.81 (0.01)	0.000110833	0.84 (0.03)	0.000172458
PLAGL1	P236	4.72915e-05	0.72 (0.02)	8.5e-06	0.75 (0.02)	2.55507e-05	0.76 (0.04)	-1.46508e-06	0.64 (0.14)	2.3e-05	0.67 (0.06)	7.88192e-05	0.76 (0.03)	2.75238e-05	0.73 (0.06)	1.7e-06	0.79 (0.05)	3.83727e-05	0.74 (0.05)	-1.41853e-05	0.76 (0.02)	3.4e-05	0.75 (0.04)	7.33024e-05
PLAGL1	P334	0.00103298	0.79 (0.02)	0.000110833	0.88 (0.03)	0.00267426	0.85 (0.06)	0.000341425	0.73 (0.11)	-1e-05	0.67 (0.06)	0.00193238	0.86 (0.02)	0.00177983	0.73 (0.08)	0.0002075	0.77 (0.04)	4.73955e-05	0.74 (0.05)	0.000321233	0.79 (0.04)	1.7e-05	0.77 (0.06)	0.000130174
PLAT	E158	0.000415661	0.33 (0.12)	7.55e-05	0.79 (0.13)	0.000193846	0.22 (0.09)	0.000857539	0.22 (0.24)	9.3e-05	0.81 (0.08)	0.000586942	0.3 (0.14)	0.000587179	0.2 (0.04)	0.0017244	0.27 (0.11)	0.000394132	0.47 (0.05)	0.000583976	0.4 (0.12)	-4.9e-05	0.5 (0.13)	0.000129588
PLAT	P80	0.00032486	0.1 (0.05)	0.0008585	0.25 (0.09)	2.04314e-05	0.05 (0.02)	0.00189103	0.13 (0.11)	-0.000205	0.39 (0.1)	0.00011721	0.08 (0.05)	0.000935269	0.09 (0.03)	0.00165533	0.26 (0.11)	9.72482e-06	0.19 (0.05)	0.0001657	0.12 (0.03)	0.0002405	0.21 (0.07)	0.000225535
PLAU	P11	0.000540579	0.15 (0.04)	0.000121833	0.04 (0.01)	0.000566073	0.06 (0.03)	0.00120511	0.05 (0.01)	0.000504	0.13 (0.04)	6.37907e-05	0.06 (0.01)	0.00180802	0.12 (0.04)	-7.94e-05	0.24 (0.07)	0.000399076	0.18 (0.04)	0.00118584	0.12 (0.02)	0.0002795	0.13 (0.03)	0.000567128
PLAU	P176	3.58679e-05	0.11 (0.04)	-1.38333e-05	0.07 (0.07)	6.9468e-06	0.06 (0.05)	6.97619e-06	0.03 (0)	0.000128	0.09 (0.06)	2.05421e-06	0.07 (0.04)	3.6177e-05	0.11 (0.05)	-2.69333e-05	0.15 (0.1)	2.3175e-06	0.13 (0.05)	-2.65341e-05	0.13 (0.04)	-1.38333e-05	0.12 (0.04)	0.00013528
PLAUR	E123	0.000137275	0.08 (0.04)	-0.000147167	0.06 (0.01)	2.46504e-05	0.07 (0.02)	-1.93349e-05	0.04 (0.02)	0.000184	0.07 (0.02)	5.64855e-06	0.1 (0.02)	0.000331606	0.06 (0.03)	-2.46333e-05	0.09 (0.03)	8.12798e-06	0.1 (0.03)	0.00103829	0.09 (0.01)	0.000220667	0.07 (0.03)	0.000130988
PLAUR	P82	3.63169e-05	0.04 (0.02)	-0.0001315	0.03 (0.01)	6.5722e-06	0.04 (0.02)	1.0173e-05	0.03 (0.01)	-1.3e-05	0.03 (0.02)	2.25478e-06	0.04 (0.02)	-1.11857e-05	0.08 (0.03)	0.0007212	0.03 (0.01)	2.47063e-06	0.04 (0.01)	1.14177e-05	0.03 (0.02)	-9.33333e-06	0.03 (0.01)	7.04589e-05
PLG	E406	0.000132901	0.94 (0.01)	8.15e-05	0.96 (0.01)	0.000110736	0.88 (0.06)	0.000190538	0.86 (0.1)	-1.6e-05	0.95 (0.01)	1.17945e-05	0.95 (0.02)	7.80143e-05	0.85 (0.04)	0.00295527	0.92 (0.03)	3.25331e-05	0.94 (0.02)	6.70408e-05	0.94 (0.01)	0.0001015	0.94 (0.01)	6.35655e-05
PLG	P370	2.85597e-05	0.89 (0.01)	0.000119333	0.92 (0.01)	7.8552e-06	0.92 (0.02)	1.99476e-05	0.94 (0.01)	0.000123	0.92 (0.01)	6.5827e-06	0.91 (0.02)	-2.40397e-06	0.87 (0.03)	0.000191467	0.89 (0.03)	5.27965e-06	0.9 (0.02)	-1.05094e-05	0.91 (0.01)	7.5e-06	0.9 (0.02)	5.99172e-05
PLSCR3	P751	0.000145068	0.35 (0.05)	7.15e-05	0.37 (0.08)	1.1902e-05	0.19 (0.07)	0.00152011	0.36 (0.13)	-6.4e-05	0.26 (0.05)	0.000114667	0.43 (0.12)	0.00024805	0.36 (0.09)	3.78e-05	0.33 (0.1)	4.51341e-06	0.37 (0.06)	7.08609e-05	0.38 (0.08)	-1e-06	0.39 (0.07)	5.38668e-05
PLXDC1	E71	0.000517883	0.16 (0.04)	7.91667e-05	0.06 (0.01)	0.000106023	0.06 (0.02)	0.000445471	0.1 (0.05)	-3.9e-05	0.11 (0.03)	5.56117e-05	0.07 (0.02)	0.000443563	0.11 (0.05)	0.000104133	0.49 (0.14)	0.00403707	0.14 (0.04)	0.00013209	0.13 (0.02)	0.000103667	0.12 (0.03)	0.000260594
PLXDC1	P236	0.00133182	0.05 (0.01)	0.000199167	0.02 (0.01)	0.000151934	0.03 (0.01)	0.000729756	0.04 (0.01)	9e-05	0.04 (0.01)	5.28281e-05	0.03 (0.01)	0.000760664	0.06 (0.02)	0.000400933	0.72 (0.14)	0.0116702	0.06 (0.01)	0.000582455	0.05 (0.02)	0.000200333	0.05 (0.01)	0.000744747
PLXDC2	E337	7.24139e-05	0.05 (0.02)	-5.35e-05	0.03 (0.02)	2.86233e-07	0.03 (0.01)	2.03167e-05	0.11 (0.14)	3e-06	0.03 (0.01)	1.3606e-05	0.06 (0.08)	-1.12429e-05	0.04 (0.01)	2.42333e-05	0.03 (0.01)	6.44124e-06	0.05 (0.02)	-0.00013999	0.05 (0.02)	1.1e-05	0.06 (0.02)	0.000318495
PLXDC2	P914	0.000151454	0.11 (0.03)	-1.78333e-05	0.05 (0.02)	5.02574e-05	0.05 (0.02)	0.000193007	0.18 (0.12)	2.7e-05	0.09 (0.03)	1.1932e-05	0.08 (0.05)	0.000139753	0.14 (0.08)	3.08333e-05	0.11 (0.04)	3.26289e-06	0.13 (0.03)	-0.000110745	0.12 (0.04)	9.01667e-05	0.13 (0.07)	0.000521586
PMP22	P1254	0.000153825	0.92 (0.01)	-1.83333e-06	0.92 (0.01)	2.858e-05	0.9 (0.02)	0.000107532	0.92 (0.03)	-0.000105	0.92 (0.02)	2.06342e-06	0.9 (0.02)	0.000135813	0.92 (0.02)	-0.000101433	0.91 (0.02)	8.61015e-06	0.91 (0.01)	-2.45396e-05	0.94 (0)	0.000485833	0.93 (0.01)	0.000542433
PMP22	P975	0.00139462	0.91 (0.03)	0.0003435	0.88 (0.02)	4.71265e-05	0.87 (0.03)	0.000544874	0.92 (0.02)	6e-05	0.9 (0.02)	4.89961e-05	0.86 (0.05)	0.000232225	0.92 (0.01)	0.00146267	0.95 (0.01)	0.00488086	0.87 (0.04)	-0.000250008	0.91 (0.03)	0.0001705	0.83 (0.05)	0.00357664
PODXL	P1341	0.000198454	0.09 (0.04)	-0.000107167	0.03 (0.02)	5.81357e-05	0.05 (0.03)	9.10135e-05	0.12 (0.1)	-6.2e-05	0.05 (0.02)	0.000100834	0.05 (0.02)	0.000317323	0.11 (0.04)	-3.55667e-05	0.15 (0.07)	6.855e-05	0.17 (0.13)	0.000197536	0.1 (0.02)	-5.16667e-06	0.11 (0.03)	0.000512357
POMC	E254	0.000313621	0.07 (0.04)	-0.000167833	0.03 (0.01)	0.00026322	0.04 (0.03)	0.000161025	0.03 (0)	0.000243	0.09 (0.03)	7.4744e-05	0.04 (0.01)	0.000455833	0.07 (0.02)	-0.000108533	0.1 (0.04)	1.4886e-05	0.11 (0.03)	0.0011883	0.06 (0.01)	0.000384	0.07 (0.01)	0.000513074
POMC	P400	0.000291348	0.33 (0.09)	-6.45e-05	0.16 (0.08)	2.20508e-05	0.53 (0.17)	0.000299867	0.24 (0.36)	1e-05	0.09 (0.06)	0.000276838	0.19 (0.08)	0.000309871	0.56 (0.12)	0.000700133	0.28 (0.17)	-7.42258e-07	0.45 (0.15)	0.000274625	0.21 (0.08)	4.53333e-05	0.37 (0.09)	0.000604197
POMC	P53	0.000177834	0.04 (0.01)	-5.45e-05	0.03 (0)	0.000421033	0.03 (0.01)	9.99683e-05	0.05 (0.01)	-5e-06	0.03 (0.01)	2.54662e-05	0.04 (0.01)	0.000141999	0.05 (0.01)	0.000418867	0.06 (0.03)	0.000156281	0.05 (0.02)	0.000113475	0.04 (0)	5.33333e-05	0.04 (0.01)	0.000267593
PPARD	P846	0.000295711	0.17 (0.08)	-8.8e-05	0.13 (0.06)	6.52509e-06	0.14 (0.09)	0.000140105	0.11 (0.09)	-8.4e-05	0.27 (0.1)	1.64388e-05	0.05 (0.03)	0.00100609	0.1 (0.05)	5.36e-05	0.12 (0.07)	5.79444e-06	0.21 (0.08)	0.001121	0.24 (0.1)	-3.55e-05	0.13 (0.05)	0.000611081
PPARG	E178	6.80852e-05	0.04 (0.02)	-7.31667e-05	0.03 (0)	4.91611e-05	0.03 (0.01)	4.41242e-05	0.03 (0.01)	-6e-06	0.04 (0.01)	3.30875e-06	0.04 (0.01)	5.19825e-05	0.04 (0.01)	5.3e-06	0.07 (0.07)	-5.36275e-07	0.06 (0.02)	0.000384218	0.04 (0.01)	-6.61667e-05	0.04 (0.01)	0.000103263
PPARG	P693	0.00047191	0.68 (0.04)	0.000549333	0.7 (0.11)	3.91701e-06	0.78 (0.05)	0.000323361	0.87 (0.07)	0.000217	0.63 (0.12)	6.04694e-05	0.8 (0.07)	0.000351646	0.39 (0.06)	0.00569697	0.46 (0.1)	0.000829846	0.78 (0.07)	0.000264613	0.74 (0.07)	8.8e-05	0.78 (0.05)	0.000707162
PPAT	E170	3.19738e-05	0.5 (0.06)	-5.35e-05	0.47 (0.11)	2.88256e-06	0.56 (0.05)	4.42349e-05	0.63 (0.25)	1.6e-05	0.39 (0.09)	7.77426e-05	0.55 (0.06)	1.45619e-05	0.46 (0.16)	-1.59333e-05	0.62 (0.08)	4.20499e-05	0.53 (0.07)	-8.55051e-07	0.51 (0.06)	1.71667e-05	0.5 (0.07)	2.60204e-05
PPP2R1B	P268	5.9735e-05	0.04 (0.01)	-6.66667e-07	0.02 (0.01)	6.51092e-05	0.05 (0.03)	2.15873e-07	0.03 (0)	3.7e-05	0.07 (0.03)	5.37619e-06	0.04 (0.02)	1.37476e-05	0.04 (0.01)	1.9e-06	0.06 (0.04)	2.68379e-06	0.05 (0.02)	-7.06958e-05	0.05 (0.02)	-4.43333e-05	0.04 (0.01)	0.000229317
PRDM2	P1340	0.000143724	0.9 (0.02)	0.000139667	0.94 (0.01)	0.000110655	0.93 (0.02)	0.000100647	0.93 (0.03)	-9e-06	0.91 (0.02)	4.14054e-05	0.92 (0.02)	-1.15206e-05	0.91 (0.01)	0.000277367	0.83 (0.06)	0.000729301	0.94 (0.01)	0.000337285	0.92 (0.01)	0.0001055	0.92 (0.02)	1.75954e-05
PRKAR1A	P337	0.000127648	0.06 (0.02)	-3.06667e-05	0.03 (0.01)	2.4577e-05	0.03 (0.01)	0.000290908	0.03 (0.01)	0.000179	0.06 (0.04)	6.28603e-07	0.04 (0.01)	6.12516e-05	0.05 (0.02)	-4.20667e-05	0.05 (0.02)	5.91427e-06	0.07 (0.01)	0.000212629	0.05 (0.01)	-6.38333e-05	0.06 (0.02)	0.000353617
PRKCDBP	E206	0.00028757	0.06 (0.03)	-1.83333e-06	0.03 (0.01)	3.76296e-05	0.22 (0.12)	0.00313509	0.11 (0.13)	-3.7e-05	0.05 (0.02)	2.40241e-05	0.04 (0.02)	0.000404979	0.07 (0.03)	0.000125033	0.31 (0.23)	0.000438649	0.06 (0.02)	0.000126908	0.05 (0.01)	9.33333e-05	0.06 (0.02)	0.000147456
PRKCDBP	P352	0.000592659	0.16 (0.04)	0.000355333	0.13 (0.08)	1.95492e-05	0.61 (0.21)	0.00163583	0.1 (0.11)	0.000203	0.17 (0.05)	2.93523e-05	0.07 (0.03)	0.00255867	0.51 (0.11)	0.0034393	0.51 (0.18)	0.000187829	0.21 (0.08)	9.07518e-05	0.21 (0.08)	0.000142167	0.25 (0.06)	0.00100539
PROK2	E0	7.32149e-05	0.03 (0.01)	-3.15e-05	0.02 (0)	0.000209334	0.03 (0.01)	6.21056e-05	0.07 (0.07)	-1.7e-05	0.03 (0.01)	3.13444e-06	0.03 (0.01)	2.16746e-06	0.04 (0.01)	0.0001517	0.06 (0.04)	1.75745e-05	0.05 (0.04)	-7.43293e-05	0.04 (0.01)	-5.81667e-05	0.04 (0.01)	0.000178392
PROK2	P390	0.000402609	0.03 (0.01)	-9e-05	0.01 (0)	0.000376938	0.04 (0.06)	0.000218369	0.03 (0)	0.000117	0.01 (0)	0.000507278	0.03 (0.01)	0.000113231	0.06 (0.03)	0.000639667	0.05 (0.03)	0.000271419	0.06 (0.07)	9.61748e-05	0.04 (0.03)	8.86667e-05	0.03 (0.01)	0.000635049
PROM1	P44	8.68203e-06	0.92 (0.02)	-1.75e-05	0.91 (0.02)	1.88083e-05	0.93 (0.01)	1.12675e-05	0.93 (0.03)	-1.9e-05	0.93 (0.03)	6.09469e-07	0.91 (0.03)	7.36905e-06	0.91 (0.02)	-5.46667e-06	0.94 (0.01)	6.78144e-05	0.91 (0.03)	-1.11948e-06	0.91 (0.02)	-1.36667e-05	0.92 (0.02)	6.88609e-07
PRSS1	E45	0.00047575	0.85 (0.03)	2.96667e-05	0.91 (0.01)	0.00212569	0.89 (0.03)	0.000307037	0.49 (0.38)	0.000134	0.86 (0.03)	0.000266775	0.77 (0.07)	0.000206903	0.85 (0.04)	0.0001555	0.69 (0.07)	0.000324004	0.79 (0.04)	0.000314851	0.81 (0.1)	8.55e-05	0.8 (0.04)	0.000154296
PRSS1	P1249	0.000377909	0.74 (0.03)	5.08333e-05	0.82 (0.03)	0.000421466	0.82 (0.05)	0.00032871	0.77 (0.01)	3.4e-05	0.72 (0.06)	0.000162471	0.78 (0.03)	0.000251142	0.75 (0.06)	0.0001166	0.54 (0.09)	0.00244299	0.75 (0.05)	5.21584e-05	0.76 (0.04)	2.85e-05	0.74 (0.05)	6.51436e-05
PRSS8	E134	0.000982072	0.87 (0.05)	0.000121333	0.97 (0.01)	0.00270934	0.92 (0.06)	0.00052584	0.58 (0.26)	0.000233	0.95 (0.01)	0.000480866	0.7 (0.15)	0.00105184	0.63 (0.16)	0.00135763	0.62 (0.14)	0.00118433	0.86 (0.05)	0.000410352	0.85 (0.09)	0.000138833	0.87 (0.04)	0.000889432
PSCA	E359	0.00247382	0.54 (0.05)	0.000810667	0.11 (0.04)	0.00650624	0.78 (0.09)	0.00364884	0.65 (0.14)	0.000132	0.24 (0.08)	0.00155894	0.64 (0.08)	0.00224185	0.67 (0.07)	0.00120477	0.68 (0.11)	0.00238923	0.69 (0.06)	0.00198227	0.6 (0.07)	0.0005105	0.58 (0.1)	0.00181327
PSCA	P135	0.000259796	0.71 (0.06)	0.000116333	0.87 (0.01)	0.000645161	0.86 (0.06)	0.000634564	0.6 (0.17)	4.5e-05	0.8 (0.05)	0.000198615	0.7 (0.11)	0.000189259	0.65 (0.14)	0.000227167	0.5 (0.09)	0.000444625	0.75 (0.05)	3.7869e-05	0.78 (0.03)	1.86667e-05	0.72 (0.06)	7.13048e-05
PSIP1	P163	0.00034282	0.14 (0.08)	0.000190833	0.02 (0.01)	0.000246071	0.03 (0.01)	0.000860887	0.08 (0.08)	-1e-05	0.08 (0.03)	7.20888e-06	0.02 (0)	0.00151019	0.11 (0.09)	0.000119167	0.15 (0.08)	5.93944e-05	0.11 (0.04)	0.000170466	0.12 (0.08)	9.31667e-05	0.09 (0.02)	0.000626726
PTCH	E42	0.000672129	0.04 (0.02)	0.0002425	0.02 (0)	0.000786384	0.02 (0.01)	0.000205946	0.04 (0.01)	0.000149	0.02 (0)	0.000260401	0.02 (0)	0.00239818	0.05 (0.01)	0.0008068	0.05 (0.01)	0.000315351	0.05 (0.01)	0.000923805	0.04 (0.01)	0.000217667	0.04 (0.01)	0.0009399
PTCH2	E173	0.000757653	0.64 (0.07)	0.000127167	0.39 (0.05)	0.000845769	0.31 (0.14)	0.00111711	0.6 (0.17)	6.3e-05	0.55 (0.05)	0.000461727	0.31 (0.05)	0.00392502	0.6 (0.07)	0.000286767	0.74 (0.13)	0.000229692	0.72 (0.06)	0.000736722	0.68 (0.03)	0.0003555	0.68 (0.06)	0.000676691
PTCH2	P37	7.64223e-05	0.08 (0.05)	-1.66667e-05	0.06 (0.01)	1.49352e-05	0.06 (0.01)	3.31452e-05	0.14 (0.17)	-5.1e-05	0.04 (0.01)	0.00019057	0.09 (0.02)	0.000189312	0.07 (0.02)	1.32e-05	0.07 (0.02)	7.81219e-06	0.08 (0.02)	0.000140992	0.06 (0.01)	-1.91667e-05	0.07 (0.02)	1.48971e-05
PTCH2	P568	0.000354979	0.36 (0.08)	-4.46667e-05	0.17 (0.05)	0.000185744	0.14 (0.09)	0.000896703	0.36 (0.14)	-0.000106	0.19 (0.05)	0.000213233	0.19 (0.06)	0.000369907	0.31 (0.08)	-1.74e-05	0.39 (0.12)	6.25482e-05	0.41 (0.08)	0.000273331	0.39 (0.03)	0.000214667	0.38 (0.05)	0.000721367
PTEN	P438	0.000194332	0.03 (0.01)	8.16667e-05	0.01 (0)	0.000261221	0.02 (0.01)	3.59e-05	0.09 (0.09)	0.000107	0.03 (0.01)	3.01156e-05	0.02 (0)	0.000770607	0.03 (0.01)	0.000157667	0.04 (0.01)	3.78108e-05	0.04 (0.01)	0.000124662	0.03 (0.01)	-0.000129167	0.03 (0)	0.00037102
PTGS1	E80	0.000483027	0.15 (0.03)	3.56667e-05	0.05 (0.01)	0.00147516	0.09 (0.04)	4.76349e-06	0.07 (0.05)	-2.1e-05	0.19 (0.04)	0.000627234	0.05 (0.01)	0.00105465	0.15 (0.05)	4.34667e-05	0.25 (0.09)	4.25706e-05	0.18 (0.04)	0.000123813	0.17 (0.05)	-3.81667e-05	0.14 (0.03)	0.000228229
PTGS1	P2	0.000117625	0.06 (0.02)	-8.25e-05	0.02 (0.01)	0.000183415	0.04 (0.02)	1.65429e-05	0.04 (0)	0.000113	0.06 (0.02)	2.75487e-05	0.03 (0.01)	0.000641642	0.07 (0.04)	4.86667e-06	0.12 (0.08)	1.41552e-05	0.09 (0.03)	8.5503e-05	0.06 (0.01)	8.35e-05	0.08 (0.05)	0.000160638
PTGS2	P308	4.43513e-05	0.08 (0.02)	3.55e-05	0.07 (0.02)	1.37032e-05	0.06 (0.02)	4.1073e-05	0.07 (0.07)	1.3e-05	0.04 (0.03)	1.15501e-05	0.12 (0.05)	9.57627e-05	0.09 (0.02)	-2.51e-05	0.07 (0.06)	2.1374e-06	0.11 (0.04)	-2.60787e-05	0.08 (0.03)	-1.9e-05	0.1 (0.04)	0.000136906
PTGS2	P524	2.0222e-05	0.07 (0.02)	-3.5e-06	0.07 (0.02)	8.31905e-06	0.1 (0.04)	-3.09589e-06	0.06 (0.02)	3.4e-05	0.1 (0.04)	2.86913e-06	0.11 (0.05)	1.03143e-05	0.11 (0.04)	2.29333e-05	0.29 (0.15)	0.000147528	0.09 (0.04)	-3.35636e-05	0.08 (0.01)	1.76667e-05	0.1 (0.06)	1.36243e-05
PTHLH	E251	0.00250984	0.69 (0.06)	0.000981167	0.24 (0.07)	0.00161463	0.74 (0.11)	0.00453116	0.57 (0.18)	0.000131	0.2 (0.04)	0.00470742	0.58 (0.11)	0.00163468	0.52 (0.09)	0.0010966	0.5 (0.11)	0.000954824	0.61 (0.08)	0.00117482	0.5 (0.13)	0.000387333	0.55 (0.07)	0.00223887
PTHLH	P15	0.00414259	0.87 (0.04)	0.000690833	0.54 (0.15)	0.000409429	0.92 (0.02)	0.00542896	0.83 (0.08)	0.000316	0.33 (0.11)	0.00877662	0.79 (0.05)	0.00322943	0.84 (0.04)	0.00159323	0.87 (0.04)	0.00381145	0.87 (0.04)	0.00225899	0.76 (0.12)	0.000583833	0.83 (0.04)	0.00359859
PTHLH	P757	0.00835207	0.84 (0.02)	0.0011845	0.8 (0.06)	0.00653798	0.88 (0.03)	0.00440643	0.89 (0.03)	0.000675	0.51 (0.08)	0.0205241	0.85 (0.05)	0.00413241	0.86 (0.02)	0.0024836	0.83 (0.12)	0.00330633	0.84 (0.04)	0.0027552	0.8 (0.07)	0.000986167	0.83 (0.04)	0.00497625
PTHR1	E36	0.000156689	0.93 (0.02)	-9.16667e-06	0.94 (0.01)	1.02125e-05	0.94 (0.01)	2.54183e-05	0.93 (0.03)	-3.4e-05	0.93 (0.02)	2.20362e-06	0.92 (0.02)	9.58714e-05	0.82 (0.04)	0.0058661	0.95 (0.01)	2.78002e-05	0.95 (0.01)	0.000133608	0.94 (0.01)	3.13333e-05	0.94 (0.01)	1.83426e-05
PTHR1	P170	0.000168822	0.92 (0.02)	7.81667e-05	0.95 (0.01)	3.5916e-05	0.93 (0.02)	2.5223e-05	0.93 (0.02)	-4e-06	0.94 (0.02)	4.02404e-08	0.93 (0.02)	1.82698e-06	0.69 (0.1)	0.00606687	0.94 (0.03)	2.97308e-07	0.94 (0.01)	7.05051e-05	0.93 (0.02)	3.46667e-05	0.93 (0.01)	7.29696e-05
PTHR1	P258	0.000793757	0.73 (0.04)	0.000146833	0.68 (0.06)	0.000870919	0.77 (0.1)	0.000259835	0.69 (0.14)	-0.000178	0.82 (0.03)	0.00153016	0.45 (0.15)	0.000828348	0.47 (0.09)	0.00126813	0.86 (0.05)	0.000690284	0.69 (0.05)	0.000310384	0.66 (0.19)	-7.13333e-05	0.65 (0.07)	0.000461952
PTK2	P735	3.31583e-05	0.05 (0.01)	-3.98333e-05	0.04 (0.01)	3.18989e-05	0.09 (0.03)	0.000137162	0.04 (0.01)	3.3e-05	0.04 (0.02)	6.16483e-06	0.07 (0.01)	0.000284751	0.05 (0.01)	-1.50333e-05	0.07 (0.02)	2.52913e-05	0.05 (0.02)	-3.30678e-05	0.06 (0.03)	1.35e-05	0.05 (0.01)	2.5625e-05
PTK2B	P673	2.59935e-05	0.04 (0.02)	-8.16667e-06	0.03 (0)	7.23693e-05	0.03 (0)	2.92048e-05	0.04 (0)	-1.3e-05	0.04 (0.02)	-9.05834e-07	0.03 (0.01)	1.02246e-05	0.04 (0.01)	-4.51333e-05	0.04 (0.02)	-1.58405e-06	0.05 (0.02)	0.000258899	0.04 (0.01)	-1.25e-05	0.04 (0.01)	-1.59402e-05
PTK6	E50	0.000974259	0.48 (0.1)	0.000249667	0.53 (0.08)	1.54971e-05	0.74 (0.07)	0.00338423	0.14 (0.1)	0.000567	0.59 (0.08)	4.54974e-05	0.26 (0.12)	0.0022493	0.65 (0.07)	0.0020693	0.65 (0.11)	0.000339828	0.49 (0.09)	-0.000200128	0.46 (0.18)	2.48333e-05	0.39 (0.09)	0.00246813
PTK7	E317	0.000148531	0.7 (0.06)	4.55e-05	0.48 (0.14)	0.000123031	0.42 (0.19)	0.000301694	0.79 (0.03)	0.000146	0.72 (0.04)	0.000106037	0.42 (0.16)	0.00101485	0.66 (0.09)	-9.80667e-05	0.65 (0.07)	4.01231e-06	0.72 (0.04)	0.000139129	0.72 (0.06)	5.16667e-05	0.7 (0.05)	9.95891e-05
PTPN6	E171	0.00367765	0.29 (0.07)	0.000837833	0.02 (0)	0.00807512	0.61 (0.16)	0.00358021	0.13 (0.18)	-0.000249	0.06 (0.03)	0.00235929	0.17 (0.04)	0.00259982	0.18 (0.05)	0.00167087	0.54 (0.08)	0.00277859	0.54 (0.18)	0.00188176	0.22 (0.11)	0.000545167	0.51 (0.13)	0.00488336
PTPN6	P282	0.00140057	0.86 (0.04)	0.000204167	0.31 (0.12)	0.00101158	0.92 (0.01)	0.00606844	0.53 (0.43)	-9.6e-05	0.21 (0.12)	0.00209777	0.63 (0.11)	0.00107407	0.71 (0.1)	0.000744167	0.74 (0.12)	0.00093877	0.86 (0.07)	0.000852306	0.77 (0.12)	0.000242	0.8 (0.13)	0.000782891
PTPNS1	E433	5.66419e-05	0.03 (0.01)	0.000114333	0.01 (0)	8.41723e-05	0.01 (0.01)	0.000104123	0.02 (0)	7e-05	0.01 (0.01)	1.96754e-06	0.01 (0)	0.000180998	0.02 (0)	8.40667e-05	0.02 (0.01)	9.43725e-06	0.03 (0.01)	0.000163395	0.02 (0.01)	-9.58333e-05	0.02 (0.01)	3.79444e-05
PTPNS1	P301	0.000201888	0.03 (0.01)	0.000142333	0.02 (0)	0.000157387	0.02 (0.01)	0.000185458	0.04 (0.01)	7.1e-05	0.02 (0.01)	4.78648e-05	0.02 (0)	0.00119122	0.04 (0)	0.0003926	0.05 (0.02)	7.95274e-05	0.04 (0.01)	0.000219659	0.03 (0.01)	-6.66667e-06	0.04 (0.01)	0.000239638
			Bladder (n=5)		Blood (n=30)		Brain (n=12)		Cervix (n=3)		Infant blood (n=55)		Head and neck (n=11)		Kidney (n=6)		Placenta (n=19)		Pleura (n=18)		Small intestine (n=5)		Lung (n=53)
GENE	CpG	Mean decrease in accuracy	Mean (sd)	Decrease in accuracy	Mean (sd)	Decrease in accuracy	Mean (sd)	Decrease in accuracy	Mean (sd)	Decrease in accuracy	Mean (sd)	Decrease in accuracy	Mean (sd)	Decrease in accuracy	Mean (sd)	Decrease in accuracy	Mean (sd)	Decrease in accuracy	Mean (sd)	Decrease in accuracy	Mean (sd)	Decrease in accuracy	Mean (sd)	Decrease in accuracy
PTPRF	E178	2.2384e-05	0.13 (0.08)	-5.43333e-05	0.12 (0.06)	2.8353e-06	0.07 (0.02)	0.000213086	0.07 (0.07)	-8e-06	0.11 (0.05)	1.50037e-06	0.14 (0.05)	-2.41119e-05	0.13 (0.06)	-4.18e-05	0.16 (0.09)	3.08586e-07	0.17 (0.05)	0.000140039	0.13 (0.04)	-6.06667e-05	0.15 (0.05)	1.79083e-05
PTPRG	E40	2.5281e-05	0.05 (0.02)	-7.33333e-06	0.06 (0.02)	-1.50221e-06	0.05 (0.02)	4.05571e-05	0.04 (0.01)	9.9e-05	0.07 (0.03)	1.5874e-07	0.08 (0.02)	0.000233363	0.06 (0.02)	-2.83333e-05	0.06 (0.03)	2.39752e-06	0.07 (0.02)	-1.02375e-05	0.06 (0.02)	-5.15e-05	0.07 (0.02)	5.50352e-05
PTPRG	P476	1.56664e-05	0.03 (0.01)	-1.98333e-05	0.02 (0.01)	9.5697e-06	0.02 (0.01)	3.67762e-05	0.03 (0)	-1.4e-05	0.04 (0.01)	5.07702e-06	0.03 (0.01)	-8.33968e-06	0.03 (0)	4.96667e-06	0.03 (0.01)	2.90404e-06	0.03 (0.01)	-3.45153e-05	0.03 (0.01)	-3.66667e-05	0.03 (0.01)	6.11118e-05
PTPRH	E173	0.00285844	0.7 (0.07)	0.000596	0.19 (0.05)	0.00395221	0.87 (0.03)	0.00753622	0.29 (0.22)	0.000348	0.29 (0.05)	0.0038212	0.66 (0.15)	0.000965868	0.78 (0.07)	0.00168183	0.6 (0.15)	0.00191467	0.71 (0.1)	0.0013177	0.62 (0.11)	0.000622	0.68 (0.09)	0.0023428
PTPRH	P255	0.00106845	0.88 (0.04)	7.61667e-05	0.97 (0.01)	0.00332628	0.95 (0.03)	0.000422749	0.86 (0.04)	6.6e-05	0.92 (0.02)	0.00083506	0.92 (0.06)	5.85238e-05	0.89 (0.03)	0.000125733	0.64 (0.09)	0.00333443	0.91 (0.03)	0.000128074	0.81 (0.15)	1.15e-05	0.91 (0.02)	0.000292693
PTPRO	E56	0.00124967	0.03 (0.01)	0.000233	0.01 (0)	0.000115865	0.01 (0)	0.000824325	0.02 (0)	0.000116	0.02 (0)	4.6142e-05	0.02 (0.01)	0.000628725	0.02 (0)	0.000380767	0.75 (0.19)	0.0114834	0.03 (0.01)	0.000394279	0.04 (0.03)	0.0001645	0.02 (0)	0.000585007
PTPRO	P371	0.00075686	0.2 (0.08)	7.03333e-05	0.13 (0.07)	3.8946e-05	0.12 (0.08)	0.00044374	0.16 (0.2)	2.1e-05	0.17 (0.06)	3.67526e-05	0.16 (0.06)	0.000356335	0.25 (0.12)	4.57e-05	0.78 (0.1)	0.00655559	0.23 (0.11)	4.58989e-05	0.26 (0.04)	0.000665667	0.16 (0.04)	0.000488415
PURA	P928	0.000625345	0.04 (0.01)	7.88333e-05	0.02 (0.01)	6.56738e-05	0.03 (0.02)	0.000347605	0.04 (0.01)	3.6e-05	0.04 (0.03)	2.0404e-05	0.03 (0.01)	0.000301206	0.05 (0.02)	0.000172867	0.7 (0.2)	0.0042111	0.06 (0.04)	-9.88916e-06	0.05 (0.02)	-9.83333e-06	0.06 (0.02)	0.00083326
PWCR1	E81	0.00016021	0.97 (0.01)	5.8e-05	0.98 (0)	4.77041e-05	0.97 (0.01)	0.000135925	0.96 (0.01)	5.1e-05	0.97 (0.01)	1.55476e-05	0.97 (0)	0.000125991	0.97 (0.01)	8.53333e-06	0.93 (0.03)	0.000822596	0.98 (0.02)	0.000413861	0.98 (0)	6.51667e-05	0.98 (0.01)	9.71306e-05
PWCR1	P357	9.32588e-06	0.89 (0.02)	-1.66667e-05	0.87 (0.03)	-9.92902e-07	0.88 (0.03)	1.6873e-05	0.9 (0.03)	-2.4e-05	0.85 (0.02)	8.73326e-06	0.89 (0.02)	1.35071e-05	0.88 (0.02)	-1.93333e-05	0.78 (0.12)	3.25318e-05	0.87 (0.04)	-2.67349e-05	0.9 (0.01)	3.3e-05	0.88 (0.03)	2.28372e-05
PWCR1	P811	6.86512e-05	0.91 (0.02)	-8.83333e-06	0.94 (0.02)	1.1126e-05	0.91 (0.04)	1.89802e-05	0.88 (0.07)	-4.5e-05	0.91 (0.03)	5.08982e-06	0.93 (0.01)	3.49262e-05	0.91 (0.04)	-1.27667e-05	0.81 (0.05)	0.000549935	0.92 (0.03)	7.38439e-06	0.92 (0.01)	-1.46667e-05	0.93 (0.02)	6.85356e-05
PXN	P308	0.00387814	0.17 (0.05)	0.000727667	0.21 (0.04)	0.00144172	0.22 (0.1)	-0.000908994	0.08 (0.08)	0.00037	0.4 (0.08)	0.00914198	0.13 (0.07)	0.00274424	0.09 (0.04)	0.00174207	0.16 (0.06)	0.00338288	0.16 (0.04)	0.0018783	0.14 (0.05)	0.000696667	0.15 (0.04)	0.00330405
PYCARD	E87	0.00285315	0.04 (0.01)	7.85e-05	0.04 (0)	0.000146201	0.26 (0.11)	0.016045	0.04 (0)	0.000528	0.04 (0.01)	2.9346e-05	0.06 (0.01)	0.00451806	0.06 (0.01)	0.0022597	0.41 (0.26)	0.00556364	0.05 (0.01)	-0.000152276	0.04 (0.01)	0.000152833	0.04 (0.01)	0.00500028
PYCARD	P150	0.00437046	0.39 (0.11)	-0.000524667	0.59 (0.04)	0.0061751	0.78 (0.1)	0.00492276	0.37 (0.16)	-0.00069	0.23 (0.06)	0.00919376	0.66 (0.07)	0.00434814	0.44 (0.11)	9.03333e-06	0.52 (0.09)	0.00318771	0.4 (0.07)	0.00121466	0.44 (0.1)	0.0006455	0.4 (0.08)	0.00152005
PYCARD	P393	0.000672687	0.21 (0.04)	0.000177833	0.14 (0.03)	0.00155725	0.41 (0.12)	0.000566505	0.21 (0.13)	-0.000132	0.34 (0.06)	0.000766597	0.13 (0.05)	0.001022	0.36 (0.1)	5.75667e-05	0.61 (0.1)	0.00118992	0.28 (0.07)	7.8172e-05	0.2 (0.04)	0.000226333	0.25 (0.05)	0.000224652
RAB32	E314	0.000116159	0.06 (0.03)	-5.05e-05	0.04 (0.03)	2.46516e-06	0.03 (0.01)	0.000602412	0.06 (0.05)	-6e-06	0.04 (0.01)	2.31025e-05	0.1 (0.05)	0.000354033	0.05 (0.02)	-4.03667e-05	0.07 (0.08)	-1.07564e-06	0.08 (0.03)	-1.19521e-05	0.13 (0.13)	0.000154167	0.08 (0.04)	0.000242235
RAB32	P493	0.00361578	0.14 (0.05)	0.000646	0.05 (0.02)	0.00104459	0.36 (0.13)	0.00289274	0.19 (0.15)	-0.000105	0.02 (0.01)	0.00741501	0.47 (0.17)	0.00329136	0.27 (0.11)	0.00145707	0.34 (0.12)	0.00358156	0.29 (0.1)	0.00188714	0.27 (0.21)	0.000540333	0.22 (0.06)	0.00322345
RAD50	P191	0.00325307	0.6 (0.1)	0.0027535	0.87 (0.05)	0.00162804	0.37 (0.14)	0.00854522	0.26 (0.19)	0.002043	0.8 (0.06)	0.000143159	0.57 (0.1)	0.00392898	0.49 (0.08)	0.00858367	0.24 (0.09)	0.00980291	0.72 (0.06)	0.00281948	0.58 (0.13)	0.001386	0.72 (0.06)	0.00344605
RAD54B	P227	0.00039636	0.14 (0.04)	0.000107333	0.09 (0.07)	0.000200802	0.08 (0.04)	0.000566881	0.09 (0.06)	6.2e-05	0.25 (0.05)	0.000563986	0.07 (0.03)	0.00149298	0.14 (0.03)	0.000224267	0.26 (0.08)	7.60964e-05	0.23 (0.05)	0.000699163	0.13 (0.06)	0.000190333	0.17 (0.06)	0.000154022
RAF1	P330	0.000101089	0.14 (0.07)	1.8e-05	0.04 (0.02)	9.38113e-05	0.04 (0.02)	0.000454606	0.07 (0.04)	-3.5e-05	0.16 (0.06)	1.21639e-05	0.05 (0.02)	0.000613272	0.12 (0.03)	-1.00667e-05	0.17 (0.06)	3.24391e-05	0.14 (0.03)	0.000157086	0.12 (0.01)	0.000125333	0.11 (0.03)	4.42733e-05
RAN	P581	9.04592e-05	0.71 (0.06)	-6.5e-06	0.75 (0.1)	8.5456e-06	0.59 (0.12)	4.65325e-05	0.4 (0.18)	0.000225	0.75 (0.07)	2.40742e-05	0.62 (0.08)	8.59262e-05	0.72 (0.07)	5.73667e-05	0.35 (0.11)	0.000546677	0.7 (0.07)	5.81797e-06	0.72 (0.1)	-1.4e-05	0.72 (0.06)	8.24579e-05
RAP1A	P285	0.00100077	0.28 (0.08)	0.0002075	0.3 (0.1)	1.52286e-05	0.18 (0.07)	0.00330337	0.25 (0.18)	-0.000329	0.43 (0.06)	8.64902e-05	0.26 (0.04)	0.00205901	0.22 (0.02)	0.0038102	0.3 (0.08)	5.51053e-05	0.35 (0.06)	-0.000105	0.31 (0.05)	-1.51667e-05	0.38 (0.04)	0.00245839
RARA	E128	3.54516e-05	0.12 (0.05)	-2.18333e-05	0.1 (0.03)	1.17008e-06	0.11 (0.06)	-1.28095e-06	0.18 (0.22)	-1.8e-05	0.07 (0.02)	2.92217e-05	0.11 (0.03)	-1.24e-05	0.13 (0.06)	-2.71e-05	0.13 (0.06)	1.52527e-06	0.15 (0.05)	3.46279e-06	0.11 (0.05)	-6.05e-05	0.14 (0.05)	0.000134107
RARA	P1076	0.00853901	0.51 (0.07)	0.00158633	0.27 (0.1)	0.00253669	0.78 (0.13)	0.00678154	0.81 (0.14)	0.001133	0.08 (0.03)	0.0195334	0.73 (0.18)	0.0064306	0.65 (0.11)	0.00380557	0.78 (0.08)	0.00860689	0.49 (0.16)	0.00291098	0.47 (0.17)	0.00109917	0.4 (0.11)	0.00584849
RARA	P176	0.000460854	0.33 (0.13)	-8.25e-05	0.51 (0.08)	0.00131653	0.26 (0.1)	3.94635e-05	0.14 (0.21)	8.1e-05	0.22 (0.07)	0.001023	0.38 (0.14)	-1.36587e-05	0.39 (0.13)	4.48333e-05	0.29 (0.14)	5.38961e-08	0.41 (0.1)	6.31445e-05	0.29 (0.05)	0.0001575	0.4 (0.12)	4.06749e-05
RARB	E114	0.00178935	0.03 (0.01)	0.000806333	0.04 (0.01)	9.08114e-05	0.02 (0.01)	0.00271391	0.04 (0.02)	0.000206	0.04 (0.01)	7.40595e-05	0.11 (0.06)	0.00438387	0.04 (0.01)	0.00112997	0.62 (0.08)	0.0116668	0.08 (0.02)	0.00245594	0.04 (0.01)	0.000283667	0.05 (0.02)	0.00074849
RARB	P60	0.000340307	0.28 (0.07)	0.00011	0.05 (0.02)	0.000648752	0.08 (0.08)	0.000411398	0.03 (0.01)	0.000406	0.22 (0.06)	0.000117791	0.07 (0.03)	0.00100625	0.22 (0.07)	-1.48e-05	0.37 (0.13)	7.87864e-05	0.34 (0.09)	0.000377768	0.23 (0.04)	0.0001095	0.26 (0.06)	0.000386625
RARRES1	E235	0.000754306	0.05 (0.01)	9.76667e-05	0.02 (0)	0.00196539	0.02 (0.02)	0.00107854	0.04 (0.01)	0.000135	0.06 (0.01)	0.000591474	0.03 (0.01)	0.00148148	0.06 (0.01)	0.0001652	0.27 (0.25)	0.000128445	0.09 (0.02)	0.00117974	0.07 (0.01)	9.83333e-05	0.06 (0.02)	0.000311154
RARRES1	P426	0.000157826	0.43 (0.13)	8.83333e-05	0.84 (0.07)	0.000406961	0.34 (0.12)	0.000273126	0.18 (0.22)	0.000162	0.72 (0.08)	0.00012307	0.34 (0.18)	0.000246262	0.4 (0.13)	0.000101467	0.52 (0.21)	-5.8153e-06	0.52 (0.09)	0.000108237	0.47 (0.16)	3.3e-05	0.55 (0.1)	9.27212e-05
RARRES1	P57	0.00251645	0.82 (0.03)	0.000759	0.42 (0.06)	0.0045839	0.37 (0.15)	0.00678117	0.84 (0.05)	0.000374	0.82 (0.02)	0.00184438	0.38 (0.04)	0.00809233	0.78 (0.04)	0.00120607	0.75 (0.08)	0.000353617	0.77 (0.03)	0.00131339	0.83 (0.02)	0.0008525	0.81 (0.04)	0.00189306
RASA1	E107	0.000371858	0.04 (0.01)	8.15e-05	0.01 (0)	0.00091354	0.02 (0.01)	0.000517223	0.04 (0.02)	-1.9e-05	0.03 (0.01)	0.000115168	0.02 (0)	0.00112405	0.03 (0.01)	8.37e-05	0.04 (0.02)	5.18933e-05	0.05 (0.01)	0.000895548	0.03 (0.01)	4.16667e-06	0.04 (0.01)	0.000217987
RASGRF1	E16	0.000315524	0.04 (0.01)	3.63333e-05	0.02 (0.02)	1.24001e-05	0.02 (0.01)	0.000428684	0.03 (0)	6.1e-05	0.02 (0.01)	8.91099e-05	0.03 (0.01)	0.000206178	0.03 (0.01)	0.000179833	0.24 (0.11)	0.00235711	0.07 (0.11)	5.5399e-05	0.12 (0.18)	-3.28333e-05	0.04 (0.01)	0.000171277
RASGRF1	P768	2.4069e-05	0.06 (0.01)	1.93333e-05	0.05 (0.03)	1.71793e-05	0.05 (0.01)	1.0023e-05	0.03 (0.01)	0.000113	0.05 (0.03)	3.39039e-06	0.07 (0.01)	0.000304653	0.06 (0.04)	-2.35e-05	0.13 (0.08)	1.2479e-05	0.06 (0.02)	1.41265e-05	0.08 (0.07)	-8.33333e-06	0.05 (0.01)	9.38861e-06
RASSF1	E116	0.00184826	0.06 (0.03)	0.000309833	0.01 (0)	0.00276899	0.05 (0.03)	0.000237367	0.03 (0)	0.000465	0.04 (0.01)	0.000391557	0.02 (0)	0.00430012	0.18 (0.08)	0.0031472	0.75 (0.15)	0.00776246	0.08 (0.04)	0.00103309	0.05 (0.01)	0.000482167	0.06 (0.06)	0.00124743
RASSF1	P244	0.00213747	0.03 (0.01)	0.000367333	0.01 (0)	0.00452147	0.38 (0.18)	0.00296754	0.07 (0.07)	0.000213	0.03 (0.01)	0.000471951	0.02 (0)	0.00315663	0.42 (0.11)	0.00557623	0.78 (0.13)	0.00432513	0.04 (0.04)	0.000428026	0.04 (0.01)	0.000655167	0.04 (0.04)	0.00209649
RBL2	P250	0.000254509	0.08 (0.02)	6.1e-05	0.09 (0.05)	1.02667e-05	0.08 (0.04)	2.88889e-06	0.13 (0.03)	1.9e-05	0.18 (0.06)	0.000294902	0.09 (0.03)	0.000155868	0.07 (0.03)	7.91333e-05	0.04 (0.02)	0.00028525	0.09 (0.05)	-5.83822e-05	0.07 (0.02)	8e-06	0.07 (0.02)	0.000605278
RBP1	E158	0.000123526	0.03 (0.01)	-4.83333e-05	0.02 (0)	1.19843e-05	0.01 (0)	0.00027209	0.02 (0)	2e-06	0.01 (0)	8.05971e-05	0.03 (0.02)	-1.15802e-05	0.03 (0.01)	3.77e-05	0.03 (0.01)	-1.0118e-06	0.04 (0.01)	0.000157781	0.03 (0.02)	-3.21667e-05	0.03 (0.01)	0.000307618
RBP1	P150	4.1801e-06	0.05 (0.03)	-1.65e-05	0.02 (0.01)	3.92241e-06	0.03 (0.01)	9.08413e-06	0.03 (0.01)	3e-06	0.02 (0.01)	2.28055e-06	0.05 (0.03)	5.92167e-05	0.03 (0.01)	-5.25667e-05	0.03 (0.02)	-1.59437e-06	0.03 (0.01)	-2.23046e-05	0.03 (0.01)	-3.31667e-05	0.04 (0.01)	1.51241e-05
RBP1	P426	0.000572191	0.31 (0.11)	-8.16667e-05	0.15 (0.04)	5.28982e-05	0.42 (0.11)	0.00197906	0.37 (0.14)	0.000161	0.22 (0.06)	6.40922e-06	0.34 (0.15)	0.000764409	0.45 (0.06)	0.0033237	0.16 (0.07)	9.31979e-05	0.33 (0.19)	0.00012654	0.22 (0.11)	-0.000246167	0.21 (0.05)	0.00127438
RET	P717	4.03181e-05	0.07 (0.01)	1.41667e-05	0.04 (0.03)	7.26939e-06	0.07 (0.03)	-2.76032e-06	0.14 (0.09)	5e-05	0.06 (0.02)	-3.15616e-07	0.07 (0.02)	-4.9119e-06	0.07 (0.02)	-3.07e-05	0.06 (0.02)	5.08375e-07	0.09 (0.03)	3.53908e-05	0.07 (0.03)	-4.95e-05	0.07 (0.01)	0.000154669
RET	S374	5.83035e-05	0.06 (0.04)	-8.73333e-05	0.02 (0.01)	6.89522e-05	0.03 (0.02)	0.00011993	0.05 (0.02)	-3.1e-05	0.07 (0.03)	4.28035e-06	0.04 (0.04)	8.40325e-05	0.08 (0.05)	-5.67e-05	0.13 (0.1)	8.82133e-06	0.1 (0.03)	0.000175746	0.08 (0.03)	-4.33333e-05	0.08 (0.02)	0.000103472
RET	S260	0.000188077	0.06 (0.01)	1.18333e-05	0.02 (0.01)	0.000111613	0.05 (0.1)	0.000159362	0.06 (0.04)	-2.7e-05	0.04 (0.01)	1.91613e-05	0.04 (0.02)	0.000161568	0.07 (0.03)	2.39333e-05	0.08 (0.03)	7.53319e-06	0.1 (0.1)	-8.52901e-05	0.06 (0.01)	-2.05e-05	0.07 (0.04)	0.000630948
RHOC	P536	8.90833e-05	0.06 (0.03)	-4.78333e-05	0.04 (0.05)	4.75879e-06	0.16 (0.09)	0.000516269	0.03 (0.01)	5.8e-05	0.06 (0.03)	1.99231e-06	0.04 (0.02)	8.25619e-05	0.04 (0.02)	1.69e-05	0.06 (0.04)	-6.71768e-06	0.05 (0.03)	-9.77479e-05	0.07 (0.04)	-6.5e-06	0.06 (0.02)	0.000253957
RHOH	P121	0.006418	0.79 (0.05)	0.00134967	0.03 (0.01)	0.0101185	0.81 (0.12)	0.00489825	0.67 (0.24)	0.000568	0.04 (0.02)	0.00862471	0.79 (0.15)	0.00462208	0.73 (0.06)	0.0025932	0.94 (0.02)	0.00706509	0.82 (0.07)	0.00308606	0.8 (0.11)	0.00121083	0.81 (0.07)	0.00555388
RHOH	P953	3.09277e-05	0.92 (0.02)	-2.31667e-05	0.93 (0.01)	1.69748e-05	0.94 (0.01)	5.96556e-05	0.9 (0.08)	3.9e-05	0.9 (0.04)	1.21992e-05	0.91 (0.03)	4.72619e-06	0.92 (0.02)	-2.25e-05	0.86 (0.04)	0.000215002	0.93 (0.03)	4.77847e-05	0.94 (0.01)	2.66667e-06	0.93 (0.02)	-2.86232e-06
RIPK1	P744	0.000385892	0.81 (0.08)	8.6e-05	0.95 (0.01)	0.000796044	0.8 (0.05)	0.000424474	0.9 (0.05)	-8.4e-05	0.94 (0.02)	0.000170724	0.77 (0.14)	0.000259678	0.77 (0.12)	0.000402767	0.84 (0.05)	0.000269103	0.83 (0.08)	4.29739e-05	0.9 (0.03)	0.000104833	0.82 (0.06)	0.000634109
RIPK1	P868	0.000145908	0.88 (0.05)	-9.11667e-05	0.93 (0.01)	8.63634e-05	0.89 (0.04)	-1.19452e-05	0.92 (0.01)	6.6e-05	0.92 (0.02)	8.14967e-06	0.7 (0.15)	0.00211176	0.85 (0.06)	3.85e-05	0.94 (0.02)	0.000144424	0.89 (0.03)	-1.17068e-06	0.9 (0.05)	-2.86667e-05	0.88 (0.03)	7.15989e-05
RIPK2	E123	0.000198592	0.06 (0.01)	0.0002255	0.05 (0.01)	2.61796e-05	0.05 (0.02)	0.000117341	0.13 (0.13)	-8.7e-05	0.07 (0.02)	1.17314e-06	0.07 (0.01)	4.84032e-05	0.06 (0.01)	0.0003852	0.08 (0.04)	1.20239e-06	0.09 (0.03)	0.000815262	0.06 (0.01)	9.68333e-05	0.07 (0.01)	0.000420647
RIPK3	P124	0.00250522	0.6 (0.09)	0.00183083	0.04 (0.02)	0.00357194	0.83 (0.1)	0.00668524	0.36 (0.21)	-4.2e-05	0.13 (0.05)	0.000643703	0.38 (0.16)	0.000790783	0.79 (0.05)	0.0081571	0.63 (0.13)	0.00313033	0.48 (0.14)	0.00191514	0.42 (0.15)	0.000101333	0.35 (0.1)	0.00312762
RIPK3	P24	0.0047061	0.37 (0.11)	0.00111933	0.02 (0.01)	0.00754966	0.72 (0.15)	0.00731444	0.29 (0.04)	0.000431	0.04 (0.02)	0.00406934	0.25 (0.11)	0.00329858	0.76 (0.05)	0.00766753	0.57 (0.16)	0.00614202	0.34 (0.14)	0.00230261	0.27 (0.14)	0.00125133	0.22 (0.07)	0.00444017
RIPK4	E166	4.15592e-05	0.09 (0.03)	-3.53333e-05	0.07 (0.03)	3.46368e-06	0.05 (0.02)	2.96175e-05	0.04 (0.02)	4.1e-05	0.06 (0.02)	6.56016e-06	0.06 (0.02)	7.89286e-06	0.05 (0.01)	5.52333e-05	0.07 (0.03)	-6.8968e-06	0.08 (0.02)	2.47785e-05	0.08 (0.02)	-5.05e-05	0.09 (0.03)	0.000144122
RIPK4	P172	0.00011237	0.13 (0.07)	-0.000127667	0.06 (0.01)	2.81225e-05	0.09 (0.06)	1.15905e-05	0.06 (0.03)	4.2e-05	0.09 (0.02)	1.10629e-05	0.06 (0.03)	0.00010224	0.1 (0.04)	-8.46667e-05	0.11 (0.05)	-6.98383e-06	0.14 (0.04)	0.000658478	0.1 (0.03)	-0.0001055	0.1 (0.02)	0.000221105
ROR1	P6	1.26666e-05	0.06 (0.03)	-5.33333e-06	0.05 (0.01)	9.18328e-06	0.05 (0.01)	-9.48095e-06	0.15 (0.19)	-2.2e-05	0.04 (0.01)	4.47553e-06	0.07 (0.03)	9.13524e-05	0.05 (0.01)	-3.58e-05	0.05 (0.01)	-6.78283e-07	0.06 (0.02)	5.04579e-05	0.05 (0.01)	-1.1e-05	0.05 (0.02)	1.39201e-05
ROR2	E112	0.000125735	0.09 (0.04)	-5.9e-05	0.05 (0.01)	7.4845e-05	0.04 (0.02)	0.000230143	0.07 (0.04)	-7e-05	0.05 (0.02)	4.2389e-05	0.05 (0.02)	0.000126572	0.07 (0.03)	-2.39e-05	0.1 (0.06)	1.38095e-07	0.11 (0.04)	5.7353e-05	0.09 (0.02)	6.93333e-05	0.1 (0.02)	0.000331647
ROR2	P317	0.000128489	0.07 (0.04)	-6.36667e-05	0.02 (0.01)	0.000242747	0.05 (0.02)	1.16079e-05	0.03 (0)	0.000166	0.1 (0.04)	4.82243e-05	0.04 (0.02)	0.000128617	0.07 (0.03)	-3.56333e-05	0.1 (0.05)	5.04531e-06	0.1 (0.03)	0.000248517	0.06 (0.01)	0.0001295	0.07 (0.02)	0.00020664
RRAS	P100	1.62384e-05	0.06 (0.04)	-2.31667e-05	0.02 (0.01)	4.64248e-05	0.04 (0.04)	2.05571e-05	0.03 (0.01)	1e-05	0.07 (0.04)	4.1528e-06	0.03 (0.01)	-8.83333e-07	0.03 (0.01)	1.4e-06	0.06 (0.06)	8.49473e-07	0.05 (0.03)	1.01317e-05	0.03 (0.01)	-5e-06	0.04 (0.02)	2.79587e-05
RUNX1T1	E145	0.00124834	0.41 (0.14)	0.000189833	0.3 (0.1)	5.57305e-05	0.38 (0.09)	0.000700336	0.26 (0.21)	6.4e-05	0.31 (0.07)	4.84679e-05	0.48 (0.12)	0.000480358	0.43 (0.1)	0.000404433	0.86 (0.04)	0.0118575	0.4 (0.11)	0.000365711	0.4 (0.14)	0.000155667	0.36 (0.09)	0.00055802
RUNX1T1	P103	0.000378673	0.22 (0.06)	0.000263833	0.09 (0.04)	0.000197625	0.13 (0.12)	0.000253771	0.1 (0.1)	0.000164	0.19 (0.06)	0.000176493	0.15 (0.07)	0.00047446	0.39 (0.18)	0.0001183	0.53 (0.16)	0.000147804	0.4 (0.09)	0.000200199	0.34 (0.05)	8.1e-05	0.4 (0.11)	0.000884876
RUNX3	E27	7.82014e-05	0.91 (0.02)	-9.83333e-06	0.86 (0.05)	3.09286e-05	0.92 (0.05)	5.04333e-05	0.87 (0.12)	2e-05	0.83 (0.04)	0.000258522	0.89 (0.05)	1.16429e-06	0.92 (0.01)	6.71667e-05	0.92 (0.03)	1.7011e-05	0.88 (0.06)	-4.85079e-06	0.92 (0.03)	4.83333e-06	0.9 (0.04)	1.24159e-05
RUNX3	P247	0.000179369	0.89 (0.03)	-4.61667e-05	0.78 (0.06)	4.84234e-05	0.92 (0.04)	9.61786e-05	0.83 (0.1)	-1.70399e-22	0.7 (0.08)	0.000383687	0.87 (0.07)	3.6077e-05	0.93 (0.02)	0.000223633	0.94 (0.03)	0.000266732	0.85 (0.11)	3.31147e-05	0.89 (0.04)	6.61667e-05	0.87 (0.06)	0.00014847
RUNX3	P393	0.0012218	0.89 (0.02)	0.0002575	0.86 (0.03)	0.00110897	0.94 (0.02)	0.0010836	0.85 (0.07)	-0.000159	0.72 (0.07)	0.00280474	0.92 (0.04)	0.00103917	0.92 (0.02)	0.000548967	0.91 (0.04)	0.000868736	0.86 (0.07)	-3.70586e-05	0.91 (0.02)	0.000255667	0.88 (0.04)	0.000678907
RYK	P493	0.000319833	0.07 (0.03)	1.78333e-05	0.06 (0.05)	0.000101224	0.2 (0.27)	-5.62937e-06	0.06 (0.05)	-7.2e-05	0.18 (0.08)	0.000150521	0.08 (0.03)	-8.63889e-06	0.15 (0.07)	0.000156433	0.12 (0.08)	1.55945e-05	0.08 (0.02)	-0.000189474	0.06 (0.04)	-5.01667e-05	0.06 (0.02)	0.00116126
S100A12	P1221	0.000126205	0.82 (0.03)	-1.08333e-05	0.89 (0.01)	0.000228672	0.88 (0.04)	9.0104e-05	0.86 (0.05)	1.3e-05	0.86 (0.04)	2.77107e-05	0.87 (0.01)	0.000192235	0.81 (0.04)	0.000125833	0.82 (0.04)	2.94002e-05	0.82 (0.03)	-2.06407e-06	0.83 (0.02)	2.58333e-05	0.82 (0.03)	0.000269278
S100A2	E36	0.0012235	0.44 (0.05)	0.000872833	0.49 (0.08)	3.20471e-05	0.83 (0.07)	0.0101941	0.27 (0.1)	0.000353	0.52 (0.1)	3.81858e-05	0.34 (0.2)	0.000978876	0.55 (0.1)	-0.000222767	0.72 (0.1)	0.00148243	0.43 (0.1)	0.000388444	0.56 (0.03)	0.0017235	0.4 (0.1)	0.00178963
S100A2	P1186	0.0003437	0.83 (0.04)	0.000194833	0.92 (0.01)	0.000317086	0.91 (0.05)	0.000634029	0.55 (0.24)	0.000182	0.91 (0.02)	0.000340082	0.54 (0.22)	0.00133905	0.88 (0.05)	2.00667e-05	0.86 (0.05)	8.8629e-05	0.81 (0.07)	0.000100446	0.81 (0.1)	0.000139167	0.8 (0.05)	0.00034368
S100A4	E315	0.000960172	0.34 (0.1)	0.000172833	0.06 (0.01)	0.00125899	0.83 (0.21)	0.00366004	0.16 (0.13)	-3.8e-05	0.08 (0.03)	0.000939172	0.23 (0.11)	0.000416461	0.8 (0.07)	0.0049623	0.17 (0.06)	0.000130609	0.35 (0.11)	0.000659018	0.37 (0.03)	0.000898833	0.27 (0.08)	0.000533179
S100A4	P194	0.00281415	0.81 (0.05)	0.000767	0.46 (0.07)	0.00470264	0.9 (0.11)	0.00200871	0.82 (0.1)	0.000168	0.52 (0.07)	0.00340111	0.76 (0.1)	0.000957193	0.92 (0.01)	0.0028797	0.92 (0.03)	0.00305338	0.82 (0.07)	0.00135398	0.81 (0.1)	0.00038	0.82 (0.05)	0.00275526
S100A4	P887	0.000237695	0.87 (0.02)	4.86667e-05	0.94 (0.01)	0.000698052	0.91 (0.05)	0.000116061	0.91 (0.06)	1.8e-05	0.87 (0.03)	0.000246596	0.88 (0.04)	3.63571e-05	0.86 (0.09)	7.38e-05	0.85 (0.06)	3.077e-05	0.87 (0.02)	0.000493618	0.9 (0.01)	8.75e-05	0.89 (0.03)	8.53749e-05
SCGB3A1	E55	0.00437606	0.12 (0.03)	0.000797833	0.11 (0.02)	0.00435943	0.13 (0.05)	0.0027373	0.19 (0.16)	-0.000767	0.03 (0.01)	0.0105206	0.18 (0.05)	0.0026594	0.12 (0.04)	0.000850133	0.17 (0.1)	0.00214187	0.21 (0.21)	0.000802434	0.14 (0.12)	-0.000181667	0.12 (0.04)	0.00245374
SEMA3A	P343	1.47122e-05	0.19 (0.11)	9.16667e-06	0.11 (0.08)	4.32641e-06	0.08 (0.07)	1.32746e-05	0.04 (0)	0.000218	0.17 (0.06)	3.40452e-06	0.13 (0.07)	-9.73492e-06	0.13 (0.06)	-2.56333e-05	0.29 (0.28)	2.74916e-06	0.14 (0.05)	-1.30945e-05	0.15 (0.05)	2.5e-05	0.14 (0.05)	4.2095e-05
SEMA3A	P658	3.70296e-05	0.41 (0.06)	3.73333e-05	0.29 (0.07)	3.33985e-06	0.35 (0.08)	-7.88889e-07	0.31 (0.22)	-4.9e-05	0.34 (0.09)	8.3425e-07	0.3 (0.13)	1.34833e-05	0.37 (0.08)	-1.53333e-06	0.29 (0.12)	-3.36061e-06	0.33 (0.06)	-1.45455e-05	0.4 (0.03)	3.46667e-05	0.36 (0.07)	0.000151703
SEMA3B	E96	0.00126015	0.13 (0.05)	0.000135167	0.13 (0.04)	4.77689e-05	0.15 (0.05)	0.000633183	0.15 (0.07)	1.7e-05	0.15 (0.03)	5.06564e-05	0.1 (0.03)	0.000706895	0.1 (0.02)	0.000772767	0.62 (0.1)	0.0117835	0.18 (0.04)	0.000493586	0.15 (0.02)	0.000162667	0.15 (0.04)	0.00054349
SEMA3B	P110	0.000361243	0.1 (0.01)	0.000764	0.13 (0.04)	3.11168e-05	0.15 (0.06)	7.07056e-05	0.04 (0.01)	0.000402	0.22 (0.05)	3.8422e-05	0.07 (0.03)	0.0012292	0.11 (0.02)	0.0005747	0.58 (0.16)	0.00200389	0.18 (0.04)	0.000300927	0.17 (0.07)	3.68333e-05	0.15 (0.04)	0.000132401
SEMA3C	E49	0.000168481	0.09 (0.03)	-5.26667e-05	0.07 (0.04)	8.22304e-07	0.04 (0.01)	0.00120205	0.09 (0.05)	-9.1e-05	0.07 (0.03)	5.25348e-06	0.12 (0.08)	7.70778e-05	0.09 (0.01)	0.0003156	0.08 (0.04)	8.64791e-07	0.09 (0.03)	-0.000175791	0.08 (0.03)	-2.9e-05	0.1 (0.03)	0.000453127
SEMA3C	P642	0.000660725	0.54 (0.05)	0.00205583	0.13 (0.07)	0.000170219	0.61 (0.08)	0.00312782	0.16 (0.16)	0.000184	0.21 (0.09)	2.27499e-05	0.62 (0.12)	0.00349299	0.44 (0.08)	0.0002601	0.24 (0.08)	0.000135167	0.44 (0.12)	3.625e-05	0.39 (0.07)	0.000270833	0.34 (0.08)	0.000838931
SEMA3F	E333	2.14908e-05	0.24 (0.11)	3.36667e-05	0.13 (0.06)	1.15468e-05	0.21 (0.09)	3.94341e-05	0.1 (0.1)	-1.7e-05	0.19 (0.05)	1.04408e-05	0.11 (0.04)	4.65738e-05	0.2 (0.05)	0.000105067	0.12 (0.06)	6.15379e-06	0.17 (0.03)	1.1531e-06	0.14 (0.04)	1.33333e-06	0.14 (0.04)	2.92871e-05
SEMA3F	P692	0.000220092	0.05 (0.01)	-4.75e-05	0.02 (0.01)	0.000114808	0.04 (0.03)	6.98492e-06	0.03 (0.01)	0.000101	0.03 (0.02)	8.13204e-06	0.03 (0.01)	0.000118288	0.05 (0.02)	-1.95333e-05	0.07 (0.05)	7.98868e-07	0.06 (0.02)	2.90998e-05	0.06 (0.03)	-6.03333e-05	0.06 (0.01)	0.000805868
SEPT5	P441	0.000655406	0.27 (0.07)	0.000126333	0.52 (0.11)	6.0444e-05	0.22 (0.09)	0.000510963	0.22 (0.13)	7.1e-05	0.59 (0.06)	0.00163679	0.36 (0.11)	9.70976e-05	0.17 (0.08)	0.000393033	0.08 (0.05)	0.00101776	0.3 (0.1)	0.000283702	0.28 (0.06)	0.000117667	0.3 (0.1)	0.000329927
SEPT5	P464	0.000416897	0.45 (0.11)	2.03333e-05	0.73 (0.09)	0.000188253	0.38 (0.11)	0.000346619	0.38 (0.22)	8.7e-05	0.73 (0.05)	0.00096675	0.5 (0.12)	1.32071e-05	0.3 (0.12)	0.000211033	0.21 (0.07)	0.000736401	0.45 (0.1)	8.73219e-05	0.46 (0.06)	0.0001365	0.45 (0.11)	0.000199272
SEPT9	P374	0.000264233	0.25 (0.18)	-9.5e-06	0.32 (0.1)	1.1249e-05	0.69 (0.17)	0.00134496	0.13 (0.13)	0.000105	0.41 (0.11)	1.92737e-05	0.17 (0.07)	0.000676184	0.66 (0.12)	0.00175443	0.62 (0.13)	0.000342989	0.34 (0.1)	5.08859e-05	0.24 (0.1)	0.000231667	0.28 (0.09)	0.000258542
SEPT9	P58	0.000117943	0.66 (0.15)	6.48333e-05	0.84 (0.17)	3.00652e-05	0.77 (0.15)	2.09993e-05	0.6 (0.23)	1.9e-05	0.83 (0.04)	0.000108375	0.53 (0.16)	0.000194012	0.8 (0.08)	0.000142833	0.74 (0.15)	-9.65152e-07	0.7 (0.11)	-3.41948e-05	0.64 (0.08)	0.000271333	0.67 (0.08)	0.00027522
SERPINA5	E69	3.52239e-05	0.79 (0.03)	-4.45e-05	0.81 (0.03)	1.48764e-05	0.83 (0.02)	0.00023524	0.82 (0.03)	3e-05	0.76 (0.05)	1.2334e-06	0.81 (0.02)	7.62357e-05	0.7 (0.1)	0.000428767	0.74 (0.06)	3.0842e-06	0.77 (0.05)	3.83586e-05	0.81 (0.04)	-5.5e-05	0.79 (0.04)	7.20092e-06
			Bladder (n=5)		Blood (n=30)		Brain (n=12)		Cervix (n=3)		Infant blood (n=55)		Head and neck (n=11)		Kidney (n=6)		Placenta (n=19)		Pleura (n=18)		Small intestine (n=5)		Lung (n=53)
GENE	CpG	Mean decrease in accuracy	Mean (sd)	Decrease in accuracy	Mean (sd)	Decrease in accuracy	Mean (sd)	Decrease in accuracy	Mean (sd)	Decrease in accuracy	Mean (sd)	Decrease in accuracy	Mean (sd)	Decrease in accuracy	Mean (sd)	Decrease in accuracy	Mean (sd)	Decrease in accuracy	Mean (sd)	Decrease in accuracy	Mean (sd)	Decrease in accuracy	Mean (sd)	Decrease in accuracy
SERPINA5	P156	0.00010515	0.43 (0.03)	0.000131833	0.33 (0.08)	8.69928e-06	0.64 (0.09)	0.000677233	0.25 (0.35)	-5.5e-05	0.24 (0.07)	7.55892e-05	0.53 (0.15)	6.7819e-05	0.32 (0.12)	-1.4e-05	0.34 (0.12)	1.64778e-05	0.39 (0.07)	-6.12238e-05	0.57 (0.13)	0.0004815	0.39 (0.06)	0.000148748
SERPINB2	P939	4.53792e-05	0.94 (0.02)	2.51667e-05	0.97 (0)	0.000259112	0.95 (0.01)	-1.10222e-05	0.96 (0.01)	1.1e-05	0.95 (0.02)	1.4392e-05	0.95 (0.01)	2.02198e-05	0.94 (0.01)	7.34333e-05	0.95 (0.01)	1.58896e-06	0.95 (0.01)	-4.73365e-06	0.95 (0.01)	2.55e-05	0.95 (0.01)	1.10592e-05
SERPINB5	P19	0.000705411	0.94 (0.02)	0.0002065	0.98 (0)	0.00133217	0.97 (0.01)	0.00098819	0.47 (0.33)	0.000622	0.96 (0.01)	0.000159883	0.72 (0.16)	0.0019139	0.95 (0.02)	0.000320733	0.61 (0.13)	0.00194987	0.94 (0.03)	0.000203772	0.88 (0.12)	9.35e-05	0.95 (0.02)	0.000442647
SERPINE1	E189	3.00281e-05	0.22 (0.05)	-6.18333e-05	0.31 (0.07)	1.22763e-05	0.35 (0.12)	0.000118122	0.12 (0.04)	0.00017	0.24 (0.05)	8.96234e-06	0.16 (0.08)	9.1219e-05	0.18 (0.04)	0.000134333	0.23 (0.08)	4.85859e-07	0.25 (0.05)	2.71827e-05	0.26 (0.04)	3.7e-05	0.23 (0.04)	1.57894e-05
SERPINE1	P519	5.09228e-05	0.35 (0.21)	-5.81667e-05	0.39 (0.11)	1.73898e-05	0.6 (0.22)	0.000509767	0.23 (0.32)	4.7e-05	0.36 (0.1)	7.62559e-06	0.28 (0.1)	4.33754e-05	0.22 (0.08)	0.0001072	0.18 (0.1)	4.86186e-05	0.33 (0.08)	2.74538e-05	0.31 (0.11)	1.15e-05	0.32 (0.1)	2.12993e-05
SEZ6L	P249	3.45624e-05	0.04 (0.01)	-2.31667e-05	0.03 (0.01)	7.85091e-06	0.02 (0.01)	0.0001259	0.03 (0)	3.3e-05	0.02 (0.01)	3.92793e-05	0.03 (0.01)	-1.35317e-05	0.04 (0.01)	-1.82e-05	0.15 (0.13)	3.67026e-05	0.05 (0.02)	4.67185e-05	0.06 (0.05)	1.53333e-05	0.05 (0.03)	4.15048e-05
SEZ6L	P299	7.87488e-05	0.06 (0.03)	-5.25e-05	0.05 (0.02)	5.98134e-06	0.05 (0.03)	6.94444e-06	0.05 (0.01)	3.4e-05	0.06 (0.03)	4.18799e-07	0.05 (0.03)	-1.1146e-05	0.07 (0.04)	-3.59e-05	0.07 (0.04)	-2.3396e-07	0.07 (0.02)	-6.38126e-05	0.09 (0.05)	-5.81667e-05	0.08 (0.05)	0.00035214
SFN	E118	4.14841e-05	0.89 (0.03)	-1.75e-05	0.94 (0.01)	5.33013e-05	0.92 (0.02)	1.66222e-05	0.66 (0.23)	0.000129	0.94 (0.01)	4.31556e-05	0.78 (0.11)	0.000388149	0.89 (0.05)	-2.62e-05	0.93 (0.02)	1.0731e-05	0.91 (0.02)	-1.60611e-05	0.86 (0.1)	8.16667e-06	0.9 (0.04)	1.43551e-05
SFN	P248	0.000564261	0.2 (0.01)	0.000249167	0.05 (0.02)	0.000607695	0.31 (0.04)	0.00257983	0.1 (0.11)	0.000108	0.09 (0.04)	0.000261473	0.11 (0.04)	0.00115928	0.22 (0.06)	8.14667e-05	0.47 (0.09)	0.00145871	0.23 (0.08)	0.000134329	0.17 (0.04)	0.0001685	0.23 (0.06)	0.000290872
SFRP1	E398	4.27999e-05	0.08 (0.04)	-2.08333e-05	0.06 (0.01)	7.00165e-05	0.08 (0.07)	-3.68269e-05	0.05 (0.05)	-1.9e-05	0.03 (0.02)	3.13813e-05	0.11 (0.05)	0.000418126	0.05 (0.03)	-5.5e-05	0.05 (0.02)	6.55615e-06	0.06 (0.02)	1.58247e-06	0.12 (0.16)	3e-05	0.06 (0.03)	3.25883e-05
SFRP1	P157	6.65338e-05	0.07 (0.02)	8.56667e-05	0.03 (0.01)	3.222e-05	0.09 (0.22)	0.000332748	0.23 (0.25)	-4e-05	0.06 (0.02)	2.75573e-05	0.06 (0.05)	1.52159e-05	0.07 (0.02)	1.68333e-05	0.12 (0.06)	1.54033e-05	0.12 (0.03)	0.000261994	0.21 (0.2)	0.000162667	0.1 (0.05)	3.14671e-05
SFTPA1	E340	0.000838829	0.97 (0.01)	0.00084	0.97 (0.01)	0.0002046	0.96 (0.01)	0.00113229	0.93 (0.01)	0.000527	0.96 (0.01)	5.18121e-05	0.96 (0.01)	0.000311231	0.95 (0.01)	-3.89333e-05	0.88 (0.05)	0.000273285	0.94 (0.03)	-0.000355659	0.97 (0.01)	0.00116533	0.92 (0.03)	0.00269218
SFTPA1	P421	9.32842e-05	0.87 (0.02)	2.91667e-05	0.8 (0.04)	2.14868e-05	0.88 (0.04)	0.000226906	0.82 (0.1)	-6.1e-05	0.76 (0.07)	8.33538e-06	0.83 (0.03)	-2.275e-05	0.9 (0.02)	0.00101863	0.86 (0.04)	8.34056e-06	0.82 (0.05)	1.7227e-06	0.88 (0.03)	0.000204333	0.81 (0.05)	0.000169459
SFTPB	P689	0.00105548	0.78 (0.03)	3.91667e-05	0.87 (0.02)	0.00310606	0.86 (0.07)	0.000157523	0.74 (0.07)	-1.4e-05	0.69 (0.07)	0.00211182	0.84 (0.04)	0.000174448	0.81 (0.03)	1.26333e-05	0.83 (0.04)	6.58029e-05	0.79 (0.05)	-5.56645e-05	0.83 (0.01)	0.000192	0.77 (0.05)	0.000279599
SFTPC	E13	0.000502952	0.78 (0.03)	2.25e-05	0.91 (0.02)	0.00204769	0.87 (0.05)	0.000614132	0.78 (0.08)	-2e-05	0.75 (0.05)	0.000324277	0.75 (0.08)	0.000142755	0.8 (0.06)	5.78e-05	0.59 (0.12)	0.00026496	0.72 (0.06)	0.000332023	0.8 (0.06)	8.08333e-05	0.75 (0.06)	0.000186506
SFTPD	E169	0.00414844	0.9 (0.02)	0.000157	0.92 (0.01)	0.0017995	0.92 (0.01)	0.00607688	0.91 (0.03)	-0.000388	0.9 (0.02)	4.86703e-05	0.91 (0.01)	0.00676181	0.89 (0.03)	0.0015956	0.91 (0.02)	0.00335461	0.85 (0.04)	0.00118309	0.92 (0.01)	0.00296033	0.84 (0.04)	0.011082
SGCE	E149	8.11635e-05	0.1 (0.05)	-2.76667e-05	0.08 (0.05)	6.25769e-06	0.1 (0.08)	7.68651e-06	0.13 (0.17)	-4.6e-05	0.13 (0.05)	4.70495e-06	0.12 (0.07)	1.74135e-05	0.1 (0.05)	-2.30333e-05	0.35 (0.11)	0.000312286	0.16 (0.04)	0.000211712	0.11 (0.03)	-3.25e-05	0.12 (0.03)	0.000136859
SGCE	P250	3.60274e-05	0.89 (0.01)	1.93333e-05	0.87 (0.02)	8.78755e-06	0.86 (0.04)	1.26706e-05	0.87 (0.03)	-3.5e-05	0.86 (0.02)	2.57926e-05	0.88 (0.02)	1.35937e-05	0.87 (0.02)	1.44333e-05	0.92 (0.05)	0.000172428	0.89 (0.02)	-2.33032e-05	0.89 (0.01)	4.35e-05	0.88 (0.03)	3.6973e-05
SH3BP2	E18	0.000157985	0.28 (0.06)	3.13333e-05	0.14 (0.08)	3.41364e-05	0.4 (0.14)	0.000125134	0.18 (0.07)	6.4e-05	0.25 (0.09)	6.35226e-06	0.19 (0.11)	0.000169886	0.5 (0.12)	0.00102683	0.5 (0.12)	0.000178009	0.28 (0.08)	-8.48341e-05	0.28 (0.05)	6.78333e-05	0.24 (0.06)	0.000396871
SH3BP2	P771	8.43971e-05	0.25 (0.06)	5.73333e-05	0.14 (0.12)	5.24817e-06	0.2 (0.07)	1.20937e-05	0.15 (0.2)	3.9e-05	0.22 (0.07)	6.86363e-06	0.18 (0.12)	2.22317e-05	0.42 (0.11)	0.00108767	0.36 (0.12)	3.20427e-05	0.24 (0.07)	1.838e-05	0.23 (0.03)	0.000103667	0.19 (0.04)	0.000171862
SHB	P473	0.00205463	0.02 (0.01)	0.000258833	0.01 (0)	0.00438685	0.05 (0.03)	0.000281655	0.04 (0.04)	-1e-05	0.03 (0.01)	0.000847161	0.01 (0)	0.00369471	0.03 (0.01)	0.0001354	0.05 (0.02)	0.000276717	0.05 (0.03)	0.00465178	0.02 (0)	0.000679833	0.03 (0.01)	0.00265451
SHB	P691	0.000556039	0.21 (0.06)	0.000882833	0.02 (0.01)	0.00131722	0.31 (0.12)	0.00111182	0.1 (0.07)	-5.9e-05	0.03 (0.01)	0.000256998	0.11 (0.08)	0.000327641	0.05 (0.01)	0.000514867	0.07 (0.04)	0.000317107	0.12 (0.06)	0.000225554	0.15 (0.1)	0.000290833	0.09 (0.03)	0.000582089
SHH	E328	0.000885063	0.27 (0.06)	9.91667e-05	0.3 (0.11)	2.55114e-05	0.15 (0.05)	0.000877834	0.14 (0.13)	0.000135	0.28 (0.07)	5.18966e-05	0.22 (0.1)	0.000517153	0.28 (0.09)	0.000333767	0.81 (0.08)	0.00812668	0.33 (0.08)	0.000199895	0.35 (0.11)	0.000113333	0.3 (0.08)	0.000283279
SHH	P104	0.000117901	0.07 (0.03)	-8.75e-05	0.03 (0.01)	9.1803e-05	0.04 (0.02)	0.000151213	0.12 (0.06)	2.9e-05	0.07 (0.02)	1.31353e-05	0.05 (0.02)	0.000195845	0.12 (0.05)	0.000107867	0.15 (0.11)	1.41422e-05	0.1 (0.03)	-8.00054e-05	0.08 (0.01)	6.86667e-05	0.09 (0.02)	0.000346627
SIN3B	P514	0.000148839	0.85 (0.07)	0.000383167	0.94 (0.01)	2.87862e-05	0.89 (0.03)	0.000267568	0.75 (0.29)	-5.6e-05	0.91 (0.03)	1.12472e-05	0.92 (0.01)	0.000196261	0.88 (0.05)	9.29e-05	0.83 (0.08)	0.000262559	0.92 (0.06)	0.000250927	0.91 (0)	0.000357	0.93 (0.02)	0.000204187
SIN3B	P607	5.78744e-05	0.87 (0.01)	0.000649833	0.92 (0.02)	1.93532e-05	0.91 (0.03)	2.93262e-05	0.91 (0.04)	-9.2e-05	0.89 (0.03)	1.10283e-05	0.92 (0.04)	0.000116633	0.92 (0.02)	2.11e-05	0.94 (0.02)	1.97483e-05	0.91 (0.03)	6.48074e-05	0.92 (0.01)	0.000176667	0.9 (0.03)	8.68761e-05
SKI	E465	0.00025326	0.04 (0.01)	9.58333e-05	0.02 (0)	0.000510022	0.03 (0.01)	0.000308321	0.09 (0.1)	-8.4e-05	0.04 (0.01)	5.84773e-05	0.03 (0.01)	0.000392062	0.04 (0)	0.0003839	0.07 (0.03)	4.58876e-05	0.06 (0.02)	0.000659415	0.05 (0.01)	-0.0001465	0.05 (0.02)	0.000248494
SLC14A1	E295	7.58691e-05	0.82 (0.06)	-2.08333e-05	0.77 (0.04)	0.000171618	0.86 (0.05)	2.79087e-05	0.8 (0.12)	-4.3e-05	0.86 (0.02)	0.000123404	0.81 (0.03)	0.000104921	0.85 (0.03)	-9.46667e-06	0.74 (0.07)	9.77924e-05	0.87 (0.03)	7.26428e-05	0.87 (0.03)	-3.2e-05	0.85 (0.04)	3.42716e-06
SLC14A1	P369	0.000542002	0.62 (0.09)	0.000927167	0.9 (0.02)	0.00240317	0.67 (0.1)	0.000458255	0.81 (0.08)	-0.000211	0.82 (0.03)	4.42643e-05	0.78 (0.08)	0.00028668	0.72 (0.11)	0.000162667	0.7 (0.1)	0.000380172	0.78 (0.05)	0.000159352	0.79 (0.03)	0.0001585	0.78 (0.04)	0.000384525
SLC22A18	P216	0.00040864	0.75 (0.11)	0.0003465	0.49 (0.11)	8.94622e-05	0.85 (0.03)	0.00290813	0.44 (0.15)	0.00026	0.65 (0.09)	1.7133e-05	0.51 (0.14)	0.000753822	0.81 (0.06)	0.00105293	0.59 (0.15)	7.43607e-05	0.78 (0.06)	0.000445552	0.74 (0.12)	0.000240667	0.69 (0.08)	0.000427707
SLC22A18	P472	0.000541794	0.87 (0.02)	-0.000125	0.86 (0.03)	1.33036e-05	0.94 (0.03)	0.00190677	0.88 (0.06)	-0.000135	0.86 (0.03)	1.75554e-05	0.9 (0.02)	0.000729856	0.88 (0.04)	0.000132233	0.9 (0.04)	0.000898772	0.87 (0.03)	-0.000270427	0.88 (0.03)	-0.00021	0.85 (0.03)	0.00135748
SLC22A2	E271	0.0001416	0.96 (0.01)	5.26667e-05	0.97 (0)	8.39747e-05	0.96 (0.01)	6.01723e-05	0.96 (0.01)	9e-06	0.96 (0.01)	1.81677e-05	0.96 (0.01)	7.27548e-05	0.88 (0.03)	0.00435543	0.91 (0.06)	2.56534e-05	0.96 (0.02)	-5.55322e-06	0.96 (0)	0.000114167	0.96 (0.01)	5.77354e-05
SLC22A2	P109	0.000291343	0.81 (0.06)	-2.55e-05	0.9 (0.03)	0.000267464	0.83 (0.09)	3.59921e-05	0.84 (0.09)	-4e-06	0.82 (0.03)	0.000119454	0.88 (0.04)	0.00016374	0.72 (0.1)	5.34667e-05	0.52 (0.08)	0.00169964	0.79 (0.05)	0.000179573	0.84 (0.02)	0.000107833	0.82 (0.04)	0.000202417
SLC22A3	E122	0.000256477	0.08 (0.03)	2.45e-05	0.04 (0.04)	1.47306e-05	0.03 (0.01)	0.00293572	0.13 (0.14)	3.2e-05	0.09 (0.05)	2.6406e-06	0.13 (0.11)	0.000719692	0.08 (0.02)	0.000324367	0.21 (0.21)	2.12027e-05	0.11 (0.06)	0.000143352	0.13 (0.03)	0.000282167	0.11 (0.06)	0.000156913
SLC22A3	P528	0.000324895	0.41 (0.04)	0.000380667	0.12 (0.05)	0.000301368	0.45 (0.11)	0.00040648	0.15 (0.15)	0.000106	0.13 (0.04)	0.000472374	0.32 (0.07)	0.000287033	0.45 (0.08)	0.000712533	0.36 (0.11)	0.000225551	0.31 (0.07)	0.000199215	0.29 (0.06)	4.51667e-05	0.27 (0.07)	0.000244487
SLC22A3	P634	0.000114119	0.73 (0.05)	8.1e-05	0.56 (0.12)	5.28e-06	0.83 (0.06)	0.000745119	0.69 (0.07)	-2.7e-05	0.54 (0.09)	7.06143e-05	0.74 (0.07)	0.000154184	0.78 (0.07)	0.000782867	0.68 (0.08)	9.93218e-06	0.65 (0.08)	2.03909e-06	0.65 (0.14)	3.21667e-05	0.6 (0.09)	8.40943e-05
SLC5A5	E60	0.00357252	0.59 (0.08)	0.0006555	0.46 (0.11)	0.00139768	0.66 (0.14)	0.00141252	0.76 (0.09)	0.000375	0.26 (0.06)	0.00781914	0.71 (0.14)	0.00251327	0.62 (0.13)	0.00110853	0.63 (0.12)	0.00229084	0.72 (0.1)	0.0019462	0.65 (0.13)	0.000712167	0.68 (0.07)	0.00331518
SLC5A8	E60	0.000375508	0.36 (0.09)	-8.5e-05	0.17 (0.05)	4.51353e-05	0.16 (0.04)	0.00133366	0.19 (0.13)	3.5e-05	0.3 (0.07)	1.10429e-05	0.26 (0.09)	0.000115113	0.28 (0.07)	-6.87333e-05	0.35 (0.1)	3.22173e-06	0.46 (0.09)	0.0033915	0.36 (0.1)	-7.86667e-05	0.31 (0.07)	0.00012826
SLC5A8	P38	1.47685e-05	0.14 (0.04)	-1.15e-05	0.12 (0.05)	-3.74851e-06	0.07 (0.02)	7.11587e-05	0.09 (0.08)	1.7e-05	0.1 (0.03)	1.32546e-05	0.13 (0.12)	-8.99206e-07	0.09 (0.03)	-3.58e-05	0.09 (0.05)	3.35399e-06	0.16 (0.1)	1.25816e-05	0.15 (0.01)	0.000160333	0.12 (0.04)	1.67899e-05
SLIT2	E111	0.000395363	0.27 (0.05)	0.000284333	0.13 (0.03)	0.000505467	0.13 (0.16)	0.000597822	0.53 (0.17)	0.000145	0.29 (0.07)	0.000119077	0.17 (0.08)	0.000519687	0.32 (0.1)	2.5e-05	0.68 (0.13)	0.000486597	0.45 (0.08)	0.000388693	0.35 (0.09)	2.7e-05	0.42 (0.07)	0.000581347
SLIT2	P208	0.000397926	0.1 (0.06)	2.86667e-05	0.09 (0.04)	3.03424e-05	0.04 (0.04)	0.000604693	0.06 (0.05)	3e-05	0.06 (0.02)	9.7087e-05	0.11 (0.08)	-5.09508e-05	0.08 (0.03)	0.000107633	0.69 (0.19)	0.00335819	0.12 (0.06)	7.19462e-05	0.16 (0.13)	-0.000138833	0.12 (0.05)	0.000138719
SMAD2	P708	5.99488e-05	0.04 (0.01)	8.2e-05	0.02 (0)	2.6779e-05	0.02 (0.01)	0.000651913	0.03 (0.01)	-1.3e-05	0.03 (0.01)	2.9338e-06	0.03 (0)	-0.000103282	0.04 (0.01)	5.96667e-05	0.05 (0.02)	2.90963e-05	0.04 (0.01)	3.35535e-05	0.03 (0.01)	-2.35e-05	0.04 (0.01)	5.85021e-05
SMAD2	P848	4.52191e-05	0.23 (0.12)	-0.000104667	0.12 (0.05)	3.92353e-05	0.13 (0.05)	0.000203277	0.28 (0.04)	5e-05	0.2 (0.06)	3.56768e-06	0.19 (0.07)	-1.97754e-05	0.22 (0.06)	-4.43333e-06	0.26 (0.08)	1.99686e-06	0.26 (0.07)	7.54463e-05	0.3 (0.08)	0.000243167	0.24 (0.06)	7.89581e-05
SMAD4	P474	4.43707e-05	0.02 (0)	-4.63333e-05	0.01 (0.01)	6.98379e-05	0.01 (0)	0.000151063	0.02 (0)	4e-05	0.02 (0.01)	7.23202e-08	0.02 (0.01)	2.99349e-05	0.03 (0.01)	-1.09333e-05	0.04 (0.03)	6.29444e-06	0.03 (0.01)	3.08897e-05	0.03 (0)	0.000130833	0.03 (0.01)	7.7202e-05
SMARCA3	E20	1.06644e-05	0.07 (0.04)	9.33333e-06	0.04 (0)	6.81803e-05	0.05 (0.02)	-9.16746e-06	0.08 (0.08)	-1.2e-05	0.03 (0.02)	2.12859e-06	0.05 (0.01)	2.26587e-05	0.05 (0.02)	-1.59e-05	0.07 (0.04)	3.41587e-06	0.05 (0.01)	-1.39156e-05	0.05 (0.01)	-8.33333e-06	0.05 (0.01)	6.4818e-06
SMARCA3	P109	0.000359574	0.07 (0.02)	0.000109167	0.02 (0.01)	0.000162341	0.03 (0.02)	0.000139115	0.04 (0)	0.000195	0.06 (0.02)	2.90756e-05	0.02 (0.01)	0.00322571	0.07 (0.02)	0.0003548	0.11 (0.08)	5.83202e-05	0.08 (0.02)	0.000336617	0.06 (0.01)	0.000224333	0.07 (0.02)	0.000460593
SMARCA3	P17	9.19342e-05	0.1 (0.02)	2.26667e-05	0.03 (0.01)	0.0001301	0.05 (0.03)	8.58754e-05	0.11 (0.06)	-7e-06	0.11 (0.05)	2.69594e-05	0.05 (0.01)	0.000729668	0.14 (0.05)	0.000140733	0.19 (0.13)	1.06226e-05	0.13 (0.05)	1.47504e-05	0.14 (0.07)	-6.66667e-06	0.12 (0.04)	7.57953e-05
SMARCA4	P362	0.0014907	0.04 (0.02)	0.000288167	0.02 (0)	0.00623412	0.03 (0.01)	0.00120021	0.03 (0)	0.000191	0.03 (0.02)	-6.1305e-06	0.04 (0.01)	0.00121543	0.04 (0.01)	0.000730433	0.05 (0.03)	0.00122172	0.04 (0.01)	0.000791851	0.03 (0)	0.000424	0.04 (0.01)	0.00125602
SMARCB1	P220	0.000916596	0.33 (0.16)	1.01667e-05	0.6 (0.08)	9.81059e-05	0.1 (0.04)	0.00190256	0.17 (0.24)	0.000191	0.71 (0.06)	0.00186815	0.18 (0.14)	0.000921469	0.17 (0.09)	0.000626867	0.26 (0.12)	0.000851961	0.37 (0.12)	0.000263676	0.39 (0.15)	0.0001795	0.35 (0.11)	0.000714683
SMO	E57	0.000155118	0.06 (0.02)	1.21667e-05	0.02 (0)	0.000277347	0.03 (0.02)	0.000113372	0.04 (0)	6.6e-05	0.05 (0.02)	4.505e-05	0.03 (0.01)	0.000267981	0.08 (0.03)	6.51e-05	0.07 (0.03)	1.27267e-05	0.08 (0.02)	0.000471708	0.06 (0.03)	-8.5e-06	0.06 (0.01)	0.000163529
SMO	P455	8.36086e-05	0.07 (0.02)	-1.71667e-05	0.04 (0.02)	1.11109e-05	0.08 (0.04)	1.25516e-05	0.13 (0.16)	2e-05	0.04 (0.02)	2.54325e-05	0.06 (0.02)	4.8381e-06	0.09 (0.08)	-2.44333e-05	0.06 (0.03)	2.37081e-06	0.09 (0.02)	2.14547e-07	0.07 (0.04)	4.66667e-06	0.09 (0.04)	0.000301686
SNCG	E119	0.00134854	0.48 (0.1)	0.000328167	0.8 (0.06)	0.000638142	0.39 (0.16)	0.00111341	0.32 (0.32)	0.000157	0.86 (0.06)	0.00257798	0.32 (0.17)	0.00124267	0.57 (0.1)	0.000524433	0.28 (0.12)	0.00158052	0.5 (0.11)	0.00064866	0.51 (0.08)	0.000301667	0.54 (0.12)	0.00113301
SNCG	P53	0.000201034	0.56 (0.17)	-4.88333e-05	0.74 (0.12)	5.19897e-05	0.29 (0.14)	0.000244875	0.49 (0.4)	-2.7e-05	0.8 (0.07)	0.000455698	0.34 (0.17)	0.000168906	0.55 (0.15)	-1.58667e-05	0.35 (0.13)	0.000252411	0.52 (0.11)	3.91908e-05	0.62 (0.08)	3.5e-06	0.51 (0.13)	0.000135043
SNCG	P98	0.00201579	0.61 (0.06)	0.000337	0.65 (0.07)	0.000542323	0.32 (0.08)	0.00354516	0.48 (0.17)	9.9e-05	0.79 (0.03)	0.00536395	0.36 (0.15)	0.00181349	0.59 (0.09)	0.000726733	0.49 (0.14)	0.00174839	0.65 (0.06)	0.000283245	0.65 (0.05)	0.000385833	0.62 (0.08)	0.000622037
SNRPN	E14	9.21134e-05	0.86 (0.02)	-1.38333e-05	0.88 (0.01)	0.000180323	0.86 (0.03)	7.29683e-06	0.87 (0.01)	1.3e-05	0.82 (0.03)	0.00015755	0.87 (0.02)	3.42032e-05	0.83 (0.04)	6.38333e-05	0.78 (0.13)	6.78954e-06	0.84 (0.03)	-7.9804e-06	0.87 (0.04)	0.000143	0.84 (0.08)	8.16171e-05
SNRPN	P230	7.02431e-05	0.92 (0.02)	7.75e-05	0.96 (0.01)	0.000124606	0.95 (0.01)	0.000132938	0.93 (0.03)	-4.7e-05	0.92 (0.02)	8.73342e-05	0.93 (0.01)	1.40278e-05	0.92 (0.02)	0.000195733	0.93 (0.02)	-3.16421e-06	0.93 (0.03)	-7.80688e-06	0.94 (0)	0.000368667	0.93 (0.01)	3.29723e-05
SNRPN	S127	0.000157214	0.69 (0.06)	-9.05e-05	0.64 (0.05)	1.31619e-05	0.71 (0.05)	0.000208694	0.65 (0.04)	-1.1e-05	0.61 (0.06)	6.90306e-05	0.61 (0.02)	0.00109694	0.73 (0.05)	0.000175833	0.75 (0.09)	4.38807e-05	0.73 (0.05)	7.8631e-05	0.75 (0.02)	0.0002095	0.73 (0.06)	0.000226911
SNRPN	S99	0.000274077	0.75 (0.03)	0.000147667	0.84 (0.02)	0.000209582	0.81 (0.04)	0.000178734	0.7 (0.08)	0.000145	0.76 (0.04)	6.01449e-05	0.83 (0.02)	0.0025975	0.75 (0.07)	0.000300333	0.73 (0.08)	1.23697e-05	0.73 (0.05)	0.000240613	0.73 (0.04)	0.000142833	0.75 (0.04)	0.000218219
SNURF	E256	5.05329e-05	0.84 (0.02)	-4.66667e-06	0.85 (0.02)	-1.36496e-06	0.84 (0.01)	2.26532e-05	0.86 (0.04)	-1.1e-05	0.83 (0.03)	5.30916e-06	0.82 (0.02)	9.96508e-05	0.84 (0.03)	6e-07	0.88 (0.07)	4.93981e-05	0.84 (0.07)	-1.63877e-05	0.86 (0.01)	1.3e-05	0.85 (0.04)	0.000159331
SNURF	P2	8.58619e-05	0.54 (0.02)	7.96667e-05	0.59 (0.04)	1.40579e-05	0.52 (0.07)	4.3127e-06	0.6 (0.08)	1.2e-05	0.51 (0.06)	1.14993e-05	0.59 (0.04)	1.24103e-05	0.55 (0.11)	-1.60333e-05	0.53 (0.13)	6.52973e-06	0.52 (0.05)	0.000329687	0.56 (0.04)	-9.16667e-06	0.56 (0.06)	0.000219593
SNURF	P78	0.000189386	0.8 (0.02)	0.000130333	0.76 (0.03)	4.6417e-05	0.76 (0.05)	0.000121786	0.62 (0.06)	0.00035	0.79 (0.04)	3.82319e-05	0.75 (0.03)	0.000560659	0.79 (0.15)	-7.51667e-05	0.85 (0.08)	1.79208e-05	0.86 (0.05)	0.000494357	0.83 (0.02)	0.000147667	0.85 (0.03)	0.000348416
SOD3	P225	0.000715114	0.94 (0.01)	0.000101667	0.84 (0.04)	0.000695221	0.95 (0.01)	0.000674541	0.96 (0.01)	0.00021	0.85 (0.04)	0.00135193	0.94 (0.03)	0.000247428	0.95 (0.01)	0.0003468	0.94 (0.03)	0.000312943	0.95 (0.01)	0.000495699	0.94 (0.02)	0.00014	0.94 (0.01)	0.000587696
SOD3	P460	6.5822e-05	0.87 (0.02)	-1.01667e-05	0.82 (0.05)	3.12617e-06	0.79 (0.05)	0.000379289	0.91 (0.02)	9.5e-05	0.83 (0.04)	3.33954e-05	0.89 (0.05)	0.000181712	0.9 (0.02)	0.0002654	0.87 (0.02)	2.32791e-05	0.87 (0.04)	3.71302e-05	0.88 (0.04)	1.6e-05	0.88 (0.03)	4.21006e-05
SOX1	P1018	0.000177761	0.04 (0.01)	-3.5e-05	0.02 (0.01)	8.21787e-05	0.11 (0.22)	2.19849e-05	0.04 (0.01)	2e-06	0.02 (0.01)	0.000130098	0.07 (0.06)	7.04754e-05	0.04 (0.01)	8.86667e-06	0.23 (0.15)	0.000241942	0.09 (0.08)	-5.17618e-05	0.06 (0.04)	-4.85e-05	0.06 (0.03)	0.000457161
SOX1	P294	3.98382e-05	0.1 (0.01)	0.000176	0.08 (0.04)	-1.54352e-06	0.05 (0.03)	7.86778e-05	0.04 (0.01)	0.000123	0.06 (0.03)	2.28031e-05	0.18 (0.16)	2.39048e-06	0.12 (0.06)	6.07667e-05	0.26 (0.14)	9.59091e-05	0.1 (0.03)	8.9016e-05	0.12 (0.06)	-2e-06	0.1 (0.03)	3.0282e-05
SOX17	P287	0.000114298	0.34 (0.1)	-9.73333e-05	0.29 (0.15)	-9.38609e-07	0.15 (0.18)	0.000381729	0.22 (0.17)	2.5e-05	0.26 (0.07)	7.85185e-05	0.43 (0.17)	-3.2446e-05	0.28 (0.08)	0.000210333	0.39 (0.16)	-1.37984e-05	0.54 (0.15)	0.000924317	0.42 (0.19)	4.4e-05	0.42 (0.12)	-6.25529e-06
SOX17	P303	7.98082e-05	0.17 (0.05)	-7.78333e-05	0.15 (0.08)	3.06374e-06	0.12 (0.16)	0.000376183	0.14 (0.01)	7.5e-05	0.13 (0.03)	3.16224e-05	0.23 (0.12)	-2.04175e-05	0.19 (0.01)	0.000185767	0.2 (0.08)	1.32223e-05	0.3 (0.17)	0.000122305	0.26 (0.16)	-1.16667e-05	0.23 (0.09)	0.000142856
SOX2	P546	0.000236069	0.06 (0.02)	-4.11667e-05	0.05 (0.02)	7.44883e-06	0.03 (0.03)	0.000343241	0.11 (0.14)	-8e-06	0.04 (0.01)	0.000125975	0.07 (0.05)	-2.8373e-05	0.07 (0.02)	5.39333e-05	0.32 (0.15)	0.000667826	0.1 (0.05)	0.000280195	0.13 (0.12)	-7.33333e-06	0.09 (0.03)	0.000421854
SPARC	E50	0.000202083	0.16 (0.03)	-5.23333e-05	0.09 (0.02)	0.000154105	0.12 (0.06)	7.39841e-05	0.16 (0.09)	-3.9e-05	0.12 (0.02)	0.000165216	0.11 (0.03)	0.000160583	0.2 (0.07)	2.84333e-05	0.21 (0.06)	7.75478e-05	0.2 (0.04)	-6.16838e-06	0.25 (0.12)	4.43333e-05	0.19 (0.04)	0.000491543
SPARC	P195	2.13962e-05	0.23 (0.06)	-4.25e-05	0.16 (0.05)	1.68103e-05	0.26 (0.1)	2.12484e-05	0.29 (0.07)	-1.4e-05	0.25 (0.08)	9.15636e-06	0.17 (0.11)	3.62024e-05	0.35 (0.05)	0.000235433	0.17 (0.09)	1.01565e-05	0.26 (0.07)	-2.90591e-05	0.46 (0.22)	0.0001845	0.27 (0.09)	1.98749e-05
SPDEF	E116	9.62413e-05	0.46 (0.12)	-7.81667e-05	0.58 (0.09)	1.76353e-05	0.5 (0.11)	1.59365e-06	0.17 (0.19)	9.5e-05	0.57 (0.08)	3.31549e-05	0.29 (0.12)	0.000250025	0.57 (0.06)	0.000333367	0.64 (0.14)	0.000102447	0.42 (0.09)	6.94803e-05	0.43 (0.16)	-1.2e-05	0.39 (0.09)	0.000194297
SPDEF	P6	0.000289815	0.55 (0.05)	0.0001995	0.56 (0.14)	2.47176e-05	0.75 (0.15)	0.000693688	0.42 (0.33)	-3.5e-05	0.74 (0.09)	7.17593e-05	0.34 (0.13)	0.00107327	0.64 (0.13)	1.30667e-05	0.82 (0.11)	0.000561482	0.58 (0.08)	0.000119294	0.56 (0.11)	7.4e-05	0.53 (0.08)	0.000440667
SPI1	E205	0.000261214	0.57 (0.06)	6.23333e-05	0.33 (0.09)	0.000167613	0.71 (0.08)	0.000405365	0.56 (0.3)	-0.000117	0.27 (0.09)	0.000464995	0.67 (0.1)	0.000372012	0.62 (0.09)	0.0001166	0.65 (0.08)	0.000303572	0.55 (0.07)	0.000104344	0.54 (0.1)	-1.16667e-06	0.55 (0.07)	0.000167815
SPI1	P48	0.00243385	0.85 (0.04)	0.000587833	0.54 (0.11)	0.000743053	0.93 (0.02)	0.00235992	0.79 (0.09)	0.000159	0.31 (0.09)	0.00538099	0.9 (0.06)	0.00186714	0.85 (0.14)	0.000905533	0.88 (0.15)	0.00183536	0.9 (0.05)	0.0013584	0.88 (0.04)	0.000556333	0.88 (0.08)	0.00187299
SPI1	P929	0.000184066	0.85 (0.03)	9.83333e-06	0.89 (0.01)	8.05707e-05	0.91 (0.03)	0.000281638	0.92 (0.02)	0.000225	0.85 (0.03)	2.487e-05	0.87 (0.04)	-5.73016e-07	0.84 (0.06)	9.25e-05	0.76 (0.03)	0.000340397	0.79 (0.05)	0.000717657	0.86 (0.02)	0.000131	0.82 (0.09)	0.000202293
SPP1	E140	0.00258115	0.51 (0.06)	0.000511	0.05 (0.01)	0.00972011	0.53 (0.12)	0.00152826	0.3 (0.01)	0.000335	0.19 (0.05)	0.00152884	0.37 (0.12)	0.000924499	0.44 (0.05)	0.000920967	0.68 (0.09)	0.00239712	0.49 (0.08)	0.000955567	0.48 (0.07)	0.000402333	0.49 (0.08)	0.00171248
SPP1	P647	0.000766302	0.85 (0.03)	0.000604167	0.39 (0.11)	0.00172474	0.92 (0.02)	0.00549141	0.65 (0.16)	-1.9e-05	0.65 (0.08)	0.000116435	0.75 (0.07)	0.000490002	0.68 (0.09)	0.000691233	0.87 (0.05)	0.000452909	0.8 (0.12)	0.000187664	0.78 (0.07)	-7.16667e-06	0.77 (0.06)	0.000411034
SRC	E100	0.00102847	0.77 (0.08)	-2.73333e-05	0.91 (0.01)	0.00360249	0.88 (0.06)	0.000603879	0.74 (0.12)	-0.000155	0.75 (0.04)	0.00105894	0.86 (0.04)	0.000785039	0.52 (0.15)	0.000950667	0.73 (0.05)	5.71292e-05	0.7 (0.06)	7.81136e-05	0.69 (0.18)	-0.000122	0.67 (0.08)	0.00066428
SRC	P164	0.000262294	0.91 (0.02)	-6.28333e-05	0.94 (0.01)	0.000378998	0.94 (0.01)	0.00089412	0.79 (0.03)	0.000323	0.91 (0.02)	0.000112767	0.86 (0.06)	0.000432258	0.82 (0.06)	0.00108747	0.81 (0.06)	0.000511587	0.91 (0.02)	5.18487e-05	0.88 (0.07)	3.28333e-05	0.9 (0.02)	0.0001176
SRC	P297	7.26257e-05	0.95 (0.02)	-0.000100333	0.97 (0)	0.000193269	0.96 (0.01)	1.155e-05	0.96 (0.01)	1.6e-05	0.96 (0.02)	2.2689e-05	0.95 (0.01)	3.85857e-05	0.92 (0.03)	0.000974933	0.96 (0.02)	2.59921e-06	0.96 (0.01)	9.35939e-05	0.96 (0.01)	-8.5e-06	0.95 (0.01)	3.58625e-05
ST6GAL1	P164	0.000195374	0.1 (0.07)	-1.93333e-05	0.04 (0.01)	0.000303598	0.11 (0.12)	8.29722e-05	0.31 (0.43)	-5.8e-05	0.19 (0.09)	7.21713e-06	0.07 (0.02)	0.000460765	0.13 (0.1)	-4.54667e-05	0.19 (0.12)	1.56418e-05	0.26 (0.08)	0.00058283	0.12 (0.03)	0.000262333	0.19 (0.07)	0.000279621
ST6GAL1	P528	7.69504e-05	0.11 (0.08)	-8.73333e-05	0.03 (0.02)	5.48282e-05	0.17 (0.08)	7.24556e-05	0.06 (0.04)	-4e-06	0.1 (0.06)	2.34755e-06	0.13 (0.17)	1.77437e-05	0.17 (0.12)	6.34e-05	0.12 (0.06)	-2.56658e-06	0.13 (0.05)	6.69066e-05	0.09 (0.06)	2.16667e-06	0.09 (0.03)	0.000247401
			Bladder (n=5)		Blood (n=30)		Brain (n=12)		Cervix (n=3)		Infant blood (n=55)		Head and neck (n=11)		Kidney (n=6)		Placenta (n=19)		Pleura (n=18)		Small intestine (n=5)		Lung (n=53)
GENE	CpG	Mean decrease in accuracy	Mean (sd)	Decrease in accuracy	Mean (sd)	Decrease in accuracy	Mean (sd)	Decrease in accuracy	Mean (sd)	Decrease in accuracy	Mean (sd)	Decrease in accuracy	Mean (sd)	Decrease in accuracy	Mean (sd)	Decrease in accuracy	Mean (sd)	Decrease in accuracy	Mean (sd)	Decrease in accuracy	Mean (sd)	Decrease in accuracy	Mean (sd)	Decrease in accuracy
STAT5A	E42	0.00318525	0.16 (0.07)	0.000353667	0.2 (0.02)	0.00245229	0.52 (0.19)	0.00163847	0.27 (0.21)	-0.000232	0.11 (0.03)	0.00693772	0.3 (0.09)	0.00185509	0.28 (0.14)	0.000113	0.78 (0.07)	0.00526957	0.26 (0.12)	0.000138247	0.41 (0.23)	0.000716833	0.25 (0.07)	0.00185404
STAT5A	P704	0.00100462	0.56 (0.13)	-2.13333e-05	0.3 (0.11)	0.000546043	0.76 (0.17)	0.00086673	0.28 (0.26)	0.000131	0.19 (0.07)	0.000917171	0.36 (0.22)	0.000425268	0.82 (0.05)	0.00132223	0.44 (0.1)	0.000716657	0.76 (0.1)	0.000667431	0.68 (0.18)	3.76667e-05	0.75 (0.08)	0.0019772
STK11	P295	6.5035e-05	0.46 (0.13)	3.61667e-05	0.19 (0.07)	3.82614e-05	0.14 (0.09)	0.000299997	0.31 (0.2)	-5.2e-05	0.23 (0.09)	3.03485e-05	0.21 (0.07)	0.000161705	0.38 (0.13)	-2.23e-05	0.43 (0.16)	2.06528e-05	0.41 (0.06)	0.000137409	0.36 (0.01)	0.000132833	0.39 (0.08)	4.53155e-05
SYK	E372	0.000568633	0.05 (0.01)	-6.66667e-06	0.02 (0)	0.00133651	0.02 (0.01)	0.000206428	0.05 (0.03)	-0.000113	0.03 (0.01)	0.000383113	0.02 (0.01)	0.000440541	0.04 (0.01)	0.000145333	0.05 (0.03)	2.55931e-05	0.06 (0.02)	0.00179127	0.04 (0)	8.2e-05	0.04 (0.01)	0.00039556
SYK	P584	0.000742441	0.71 (0.1)	-0.000264	0.49 (0.11)	6.18696e-05	0.83 (0.04)	0.00318768	0.63 (0.15)	-0.000251	0.49 (0.1)	8.71324e-05	0.75 (0.1)	0.000949652	0.73 (0.07)	0.000329767	0.78 (0.11)	0.00162087	0.71 (0.08)	0.000139227	0.66 (0.06)	0.000164833	0.67 (0.08)	0.00131526
TAL1	E122	0.000298009	0.06 (0.03)	-3.68333e-05	0.03 (0.01)	4.36827e-05	0.05 (0.01)	0.000224179	0.03 (0.01)	9.8e-05	0.04 (0.02)	2.6263e-05	0.08 (0.02)	0.000324675	0.06 (0.02)	2.13e-05	0.4 (0.14)	0.00237048	0.1 (0.07)	0.00028734	0.04 (0.01)	0.000146333	0.06 (0.07)	5.6398e-05
TAL1	P594	0.000301835	0.12 (0.05)	6.33333e-05	0.1 (0.07)	1.56937e-05	0.1 (0.03)	0.000362679	0.14 (0.2)	4e-05	0.13 (0.05)	5.30433e-05	0.34 (0.17)	9.71905e-05	0.18 (0.09)	6.49333e-05	0.8 (0.1)	0.00235001	0.27 (0.16)	8.39919e-05	0.27 (0.2)	-1.16667e-05	0.21 (0.12)	0.000143362
TAL1	P817	0.000345602	0.55 (0.06)	-3.26667e-05	0.36 (0.1)	0.000136308	0.48 (0.08)	0.000189094	0.62 (0.15)	-7e-05	0.36 (0.1)	0.000338338	0.62 (0.12)	9.01016e-05	0.59 (0.03)	0.000263733	0.74 (0.18)	0.000263264	0.65 (0.09)	2.07637e-05	0.55 (0.09)	2e-05	0.65 (0.08)	0.000807101
TBX1	P520	0.000118226	0.75 (0.1)	7e-06	0.67 (0.11)	5.57244e-05	0.67 (0.15)	0.000127179	0.67 (0.08)	0.000122	0.71 (0.12)	7.34506e-05	0.85 (0.06)	0.00018779	0.71 (0.07)	0.0002484	0.89 (0.04)	0.00014837	0.84 (0.04)	0.000132146	0.81 (0.03)	6.36667e-05	0.84 (0.06)	0.000154191
TBX1	P885	0.000851361	0.1 (0.04)	0.000115167	0.05 (0.01)	0.000500492	0.13 (0.13)	0.000145051	0.14 (0.14)	3e-06	0.05 (0.01)	0.000780883	0.72 (0.21)	0.0047375	0.1 (0.03)	0.0003123	0.17 (0.07)	0.000157416	0.27 (0.16)	0.000362189	0.14 (0.08)	3.5e-05	0.23 (0.1)	0.00120346
TCF4	P175	0.000176927	0.06 (0.02)	3.23333e-05	0.02 (0.01)	0.000187931	0.03 (0.03)	0.00121637	0.04 (0.01)	8.5e-05	0.11 (0.07)	3.67066e-05	0.05 (0.03)	9.81587e-05	0.11 (0.06)	0.000130033	0.14 (0.1)	2.5102e-05	0.1 (0.04)	-1.17826e-05	0.12 (0.07)	-3.51667e-05	0.09 (0.04)	0.00026369
TCF4	P317	2.69448e-05	0.16 (0.04)	0.00043	0.11 (0.04)	1.24065e-06	0.12 (0.06)	-1.72222e-07	0.05 (0.01)	0.000167	0.14 (0.07)	-4.76892e-07	0.13 (0.04)	7.9119e-06	0.12 (0.03)	1.79667e-05	0.16 (0.13)	-1.68903e-07	0.11 (0.04)	-9.34158e-06	0.18 (0.14)	2.63333e-05	0.12 (0.03)	6.48904e-05
TCF7L2	E411	7.43458e-06	0.03 (0.01)	-1.31667e-05	0.03 (0)	4.17534e-06	0.03 (0.01)	1.19762e-05	0.05 (0.04)	-1.3e-05	0.04 (0.02)	7.83541e-07	0.04 (0.01)	7.76484e-05	0.03 (0.01)	-2.49e-05	0.04 (0.02)	-1.34271e-07	0.03 (0.01)	-8.15729e-07	0.03 (0.01)	-2.26667e-05	0.03 (0.01)	1.68153e-05
TCF7L2	P193	0.000144433	0.06 (0.02)	0.000742333	0.01 (0)	0.000372982	0.03 (0.02)	3.34755e-06	0.03 (0)	2.1e-05	0.04 (0.02)	6.89441e-06	0.02 (0)	0.000634879	0.04 (0.02)	7.19667e-05	0.07 (0.05)	1.60409e-05	0.05 (0.02)	0.000294812	0.04 (0.01)	9.81667e-05	0.04 (0.01)	7.0064e-05
TDG	E129	1.74538e-05	0.85 (0.02)	5.51667e-05	0.83 (0.05)	2.24428e-06	0.84 (0.03)	1.07667e-05	0.8 (0.04)	3.9e-05	0.84 (0.06)	-1.98416e-06	0.78 (0.03)	0.000107422	0.84 (0.03)	7.3e-06	0.75 (0.07)	4.02069e-05	0.83 (0.05)	-1.11791e-05	0.84 (0.03)	-4.66667e-06	0.83 (0.04)	2.89347e-05
TDGF1	E53	0.000176353	0.7 (0.11)	0.000196	0.86 (0.02)	0.000335079	0.81 (0.06)	5.79444e-06	0.64 (0.16)	6.6e-05	0.71 (0.05)	0.000327951	0.81 (0.03)	0.00012239	0.73 (0.06)	0.000233567	0.75 (0.1)	8.57535e-06	0.84 (0.05)	0.000104326	0.82 (0.01)	0.000216667	0.83 (0.05)	4.918e-05
TDGF1	P428	0.00020314	0.57 (0.1)	8.01667e-05	0.41 (0.08)	-4.64612e-06	0.36 (0.13)	4.95675e-05	0.28 (0.03)	0.000198	0.26 (0.07)	0.000536572	0.49 (0.14)	4.57881e-05	0.56 (0.08)	9.34333e-05	0.6 (0.12)	0.000140101	0.53 (0.08)	6.22481e-05	0.61 (0.1)	0.000102167	0.54 (0.08)	0.000164564
TEK	E75	0.000267545	0.63 (0.1)	-5.28333e-05	0.42 (0.07)	5.68817e-05	0.64 (0.11)	-2.78317e-05	0.55 (0.18)	-1.6e-05	0.41 (0.09)	0.000177898	0.59 (0.1)	8.84365e-05	0.75 (0.06)	0.000177767	0.83 (0.07)	0.00135577	0.58 (0.13)	-0.000102069	0.7 (0.12)	-4.08333e-05	0.6 (0.06)	0.000407238
TEK	P479	0.000249099	0.85 (0.03)	-0.000110833	0.88 (0.03)	9.41215e-06	0.67 (0.13)	0.00036606	0.82 (0.07)	-4.2e-05	0.88 (0.02)	1.82084e-05	0.8 (0.05)	0.000351313	0.81 (0.03)	0.0005107	0.87 (0.02)	1.62377e-05	0.84 (0.03)	-1.13251e-06	0.85 (0.03)	-7.2e-05	0.86 (0.02)	0.000799857
TEK	P526	0.000126595	0.77 (0.03)	4.5e-05	0.79 (0.03)	6.7648e-06	0.7 (0.07)	0.000496669	0.8 (0.01)	0.000106	0.79 (0.03)	1.73077e-05	0.82 (0.04)	0.000523204	0.64 (0.08)	0.0006849	0.76 (0.05)	2.25887e-06	0.71 (0.04)	0.000554002	0.71 (0.04)	0.000225333	0.76 (0.04)	-1.66909e-05
TERT	E20	0.000197181	0.04 (0.01)	8.3e-05	0.03 (0.01)	4.13339e-05	0.04 (0.02)	4.48334e-05	0.04 (0)	5.9e-05	0.04 (0.01)	5.38385e-06	0.05 (0.02)	-2.76103e-05	0.06 (0.02)	9.38e-05	0.08 (0.03)	3.4574e-05	0.07 (0.03)	0.00110632	0.04 (0.01)	-1.78333e-05	0.05 (0.01)	0.000376553
TERT	P360	0.000181991	0.1 (0.04)	9.83333e-06	0.06 (0.01)	0.000134883	0.1 (0.09)	5.5877e-05	0.08 (0.07)	2.3e-05	0.09 (0.02)	0.000111606	0.1 (0.02)	0.000105256	0.17 (0.05)	-6.29667e-05	0.15 (0.06)	2.83456e-05	0.22 (0.12)	0.000815322	0.3 (0.15)	0.000337833	0.16 (0.08)	0.000226892
TES	E172	0.00037469	0.24 (0.06)	2.28333e-05	0.06 (0.03)	0.00019085	0.1 (0.1)	0.00042042	0.16 (0.21)	-0.000166	0.23 (0.08)	1.07302e-05	0.06 (0.04)	0.00120852	0.11 (0.06)	0.00125903	0.34 (0.18)	2.00821e-05	0.38 (0.16)	0.00161123	0.21 (0.04)	0.000213333	0.26 (0.06)	0.00036204
TES	P182	2.07918e-05	0.21 (0.07)	-3.38333e-05	0.13 (0.03)	1.33329e-05	0.27 (0.17)	5.91841e-05	0.13 (0.06)	-1.5e-05	0.13 (0.04)	1.31713e-05	0.14 (0.05)	5.13381e-05	0.2 (0.06)	-1.9e-05	0.17 (0.06)	3.92287e-06	0.27 (0.12)	6.41633e-05	0.19 (0.03)	7.16667e-06	0.21 (0.05)	2.32721e-05
TESK2	P252	7.7734e-05	0.03 (0)	-2.73333e-05	0.02 (0)	0.000103131	0.03 (0.02)	-1.28452e-05	0.02 (0)	1.9e-05	0.02 (0.01)	2.28513e-05	0.03 (0.01)	-3.35714e-07	0.04 (0.01)	0.0003119	0.03 (0.01)	6.62677e-06	0.04 (0.02)	0.000286645	0.03 (0)	-1.58333e-05	0.03 (0)	0.000114142
TFAP2C	E260	0.000229742	0.04 (0.02)	-1.33333e-06	0.07 (0.03)	0.000200304	0.13 (0.19)	-6.25857e-05	0.08 (0.04)	-1.5e-05	0.02 (0.01)	0.000577997	0.11 (0.05)	0.000565514	0.04 (0.02)	4.7e-06	0.03 (0.01)	3.18213e-05	0.05 (0.03)	-3.04521e-05	0.12 (0.17)	-4.5e-06	0.05 (0.02)	0.000124659
TFAP2C	P765	0.000115681	0.11 (0.04)	-0.0001065	0.03 (0.01)	0.000102704	0.08 (0.04)	1.85325e-05	0.04 (0)	0.000153	0.06 (0.03)	2.05842e-05	0.24 (0.16)	0.000206656	0.16 (0.04)	0.000328233	0.2 (0.1)	3.43988e-05	0.15 (0.05)	0.000585078	0.11 (0.04)	6.38333e-05	0.09 (0.03)	0.000100647
TFDP1	P543	5.63495e-05	0.81 (0.04)	-4.01667e-05	0.85 (0.04)	1.57902e-05	0.89 (0.05)	0.000407047	0.8 (0.04)	4e-06	0.8 (0.04)	8.36277e-06	0.85 (0.03)	-2.01786e-05	0.8 (0.05)	8.85e-05	0.81 (0.04)	-7.38672e-07	0.81 (0.02)	0.000235121	0.84 (0.02)	-1.26667e-05	0.82 (0.04)	4.17459e-05
TFF1	P180	0.00114852	0.73 (0.1)	0.001624	0.93 (0.01)	0.000868018	0.92 (0.02)	0.00600507	0.82 (0.08)	-0.000148	0.92 (0.02)	0.000554784	0.76 (0.09)	0.00339935	0.85 (0.04)	0.00183777	0.83 (0.05)	0.000977064	0.84 (0.04)	0.000897028	0.78 (0.15)	0.000621	0.84 (0.03)	0.000656796
TFF2	P178	0.000309505	0.82 (0.06)	0.0001495	0.9 (0.01)	0.000160531	0.89 (0.07)	0.000596192	0.75 (0.1)	7.9e-05	0.91 (0.02)	0.000102692	0.8 (0.04)	0.000591284	0.45 (0.1)	0.0062525	0.81 (0.07)	6.4799e-05	0.83 (0.05)	0.000421848	0.85 (0.04)	8.4e-05	0.85 (0.03)	4.86499e-05
TFF2	P557	0.00037738	0.94 (0.02)	0.000238333	0.97 (0)	0.000146088	0.95 (0.02)	7.10754e-05	0.95 (0.02)	-3.3e-05	0.96 (0.01)	1.03324e-05	0.95 (0.01)	0.000224727	0.9 (0.02)	0.00207133	0.91 (0.04)	0.000736787	0.96 (0.02)	0.000114742	0.95 (0.02)	0.000110167	0.96 (0.01)	0.000810221
TFPI2	E141	2.07529e-05	0.07 (0.04)	-3.5e-05	0.06 (0.02)	3.99107e-06	0.06 (0.02)	1.52278e-05	0.2 (0.19)	3.39475e-22	0.06 (0.03)	3.17282e-06	0.09 (0.02)	0.00011994	0.07 (0.03)	-2.96333e-05	0.07 (0.04)	-7.39033e-07	0.09 (0.02)	0.000139065	0.11 (0.11)	4.16667e-05	0.07 (0.02)	1.2359e-05
TFPI2	P152	3.37926e-05	0.13 (0.04)	-3.48333e-05	0.17 (0.03)	9.89206e-06	0.18 (0.05)	6.90968e-05	0.29 (0.19)	3.1e-05	0.14 (0.04)	-1.85173e-06	0.13 (0.04)	9.06032e-06	0.11 (0.03)	6.07667e-05	0.11 (0.05)	8.30657e-06	0.14 (0.03)	1.86613e-06	0.18 (0.13)	-1.43333e-05	0.12 (0.03)	0.000104524
TFPI2	P9	2.86508e-05	0.06 (0.02)	-5.16667e-05	0.03 (0.01)	1.31851e-05	0.03 (0.01)	0.000100857	0.04 (0)	3.7e-05	0.05 (0.02)	2.29993e-06	0.07 (0.06)	-1.14738e-05	0.06 (0.01)	3.30333e-05	0.07 (0.04)	1.1666e-05	0.06 (0.01)	3.42321e-05	0.14 (0.16)	4.31667e-05	0.06 (0.01)	6.13632e-05
TFRC	P414	5.27302e-05	0.09 (0.03)	-9.3e-05	0.06 (0.01)	3.45712e-05	0.08 (0.02)	-7.9873e-06	0.1 (0.07)	-7.7e-05	0.07 (0.02)	1.8192e-06	0.1 (0.01)	0.000425985	0.07 (0.01)	5.33e-05	0.12 (0.04)	1.44542e-05	0.09 (0.02)	1.57307e-05	0.07 (0.01)	0.0001145	0.07 (0.01)	9.40111e-05
TGFA	P558	0.000771355	0.05 (0.01)	9.15e-05	0.02 (0)	0.00188663	0.02 (0.02)	0.00056174	0.07 (0.05)	7.2e-05	0.04 (0.03)	0.000393111	0.02 (0)	0.00301223	0.05 (0.01)	0.000475233	0.05 (0.02)	6.92545e-05	0.07 (0.02)	0.000432612	0.05 (0.01)	0.0001815	0.06 (0.01)	0.000683297
TGFA	P642	3.82823e-05	0.06 (0.03)	-1.7e-05	0.03 (0.01)	5.06007e-05	0.06 (0.02)	1.25897e-05	0.03 (0.01)	4.7e-05	0.04 (0.02)	-1.15845e-06	0.04 (0.02)	4.35619e-05	0.06 (0.02)	6.66667e-06	0.06 (0.03)	1.0404e-06	0.08 (0.02)	0.000118399	0.07 (0.02)	3.6e-05	0.06 (0.01)	7.46935e-05
TGFB1	P833	2.00141e-05	0.92 (0.02)	9.03333e-05	0.96 (0.01)	4.43024e-05	0.93 (0.03)	1.55944e-05	0.91 (0.08)	-4.9e-05	0.94 (0.02)	2.74607e-06	0.92 (0.02)	4.22119e-05	0.93 (0.02)	-2.53333e-05	0.93 (0.03)	4.87863e-06	0.94 (0.01)	3.82886e-06	0.94 (0.01)	3e-06	0.95 (0.01)	3.4488e-05
TGFB2	E226	0.000189694	0.15 (0.07)	-3.7e-05	0.09 (0.04)	4.0492e-05	0.09 (0.03)	0.000672417	0.27 (0.2)	-7e-05	0.17 (0.07)	1.09506e-06	0.18 (0.04)	0.000163692	0.2 (0.08)	-9.95e-05	0.24 (0.13)	7.90844e-06	0.22 (0.05)	0.000750951	0.17 (0.06)	-0.000130833	0.16 (0.06)	0.000349886
TGFB2	P632	0.000500033	0.06 (0.01)	0.000257667	0.02 (0)	0.000566398	0.03 (0.01)	0.000673406	0.05 (0.01)	0.000113	0.04 (0.01)	8.26321e-05	0.03 (0)	0.00317515	0.06 (0.01)	0.000428033	0.06 (0.02)	0.000171715	0.06 (0.01)	0.000369626	0.05 (0.01)	0.000193167	0.05 (0.01)	0.000562501
TGFB3	E58	0.00307091	0.68 (0.13)	0.000885167	0.97 (0)	0.0080969	0.75 (0.11)	0.00264995	0.54 (0.24)	0.000401	0.94 (0.03)	0.00252044	0.58 (0.19)	0.00276662	0.78 (0.07)	0.00157507	0.71 (0.08)	0.00307034	0.8 (0.06)	0.00135295	0.87 (0.04)	0.000530333	0.82 (0.06)	0.00239531
TGFBI	P173	3.96267e-05	0.22 (0.12)	-3.91667e-05	0.23 (0.07)	1.40865e-06	0.4 (0.15)	0.000203164	0.14 (0.15)	4.9e-05	0.21 (0.07)	2.77295e-05	0.21 (0.12)	4.18222e-05	0.18 (0.08)	5.23333e-05	0.48 (0.17)	7.1724e-05	0.29 (0.09)	2.09558e-05	0.25 (0.07)	-2.45e-05	0.3 (0.11)	3.60253e-05
TGFBI	P31	7.38271e-05	0.11 (0.05)	-1.01667e-05	0.09 (0.03)	1.74856e-05	0.06 (0.03)	0.000145451	0.04 (0)	0.000232	0.12 (0.04)	1.86711e-06	0.09 (0.03)	8.73143e-05	0.14 (0.07)	-5.65e-05	0.2 (0.07)	2.44375e-05	0.15 (0.03)	-1.15707e-05	0.11 (0.02)	0.000101667	0.14 (0.03)	0.000212857
TGFBR3	E188	0.000286737	0.04 (0.02)	-0.000108167	0.02 (0)	0.000272658	0.02 (0.01)	0.000550138	0.04 (0.02)	-4.5e-05	0.03 (0.01)	8.5486e-06	0.02 (0)	0.00102315	0.04 (0.01)	8.64333e-05	0.06 (0.03)	4.17901e-05	0.06 (0.02)	0.000444938	0.05 (0.01)	0.0001645	0.04 (0.01)	0.000507643
TGFBR3	P429	5.71792e-05	0.04 (0.01)	1.8e-05	0.02 (0)	9.76388e-05	0.02 (0.01)	0.000412954	0.03 (0)	1.6e-05	0.04 (0.02)	3.79482e-07	0.03 (0)	0.000116843	0.04 (0.01)	8.36333e-05	0.04 (0.02)	3.41078e-06	0.04 (0.01)	1.43489e-05	0.04 (0.01)	0.000120667	0.03 (0.01)	2.40026e-05
THBS1	E207	0.000124711	0.03 (0.01)	4.35e-05	0.03 (0.01)	1.32716e-05	0.07 (0.06)	0.00010703	0.07 (0.07)	-3.5e-05	0.02 (0.01)	6.96103e-05	0.06 (0.02)	0.000421552	0.04 (0.01)	-4.91e-05	0.03 (0.01)	7.16849e-06	0.05 (0.03)	-2.88543e-06	0.03 (0.01)	2.85e-05	0.04 (0.01)	0.000316271
THBS1	P500	0.000313396	0.08 (0.02)	5.56667e-05	0.03 (0.01)	0.0014373	0.06 (0.04)	1.16349e-06	0.09 (0.07)	-3.39309e-22	0.09 (0.04)	0.000307744	0.04 (0.02)	0.000284554	0.1 (0.03)	-5.16333e-05	0.12 (0.05)	1.02475e-05	0.12 (0.03)	6.88685e-05	0.09 (0.01)	2.18333e-05	0.1 (0.02)	8.13723e-05
THBS2	E129	7.29262e-05	0.04 (0.01)	4.91667e-05	0.05 (0.01)	2.7173e-05	0.07 (0.03)	6.60357e-05	0.04 (0.01)	-5e-06	0.05 (0.02)	4.25799e-06	0.08 (0.04)	0.000746055	0.04 (0.01)	0.000103733	0.05 (0.03)	2.26999e-06	0.05 (0.02)	-5.54375e-05	0.04 (0.01)	7.68333e-05	0.04 (0.01)	0.000111364
THBS2	P605	0.000798926	0.72 (0.15)	0.002138	0.11 (0.09)	0.000122722	0.79 (0.11)	0.00366303	0.21 (0.21)	4.4e-05	0.1 (0.05)	0.00035581	0.49 (0.12)	0.00091515	0.71 (0.07)	0.00319263	0.37 (0.19)	4.00577e-05	0.4 (0.17)	-0.000137139	0.47 (0.19)	0.000401667	0.3 (0.08)	0.00127462
THPO	E483	0.00315763	0.93 (0.01)	0.000582333	0.73 (0.07)	0.00207849	0.95 (0.01)	0.00271693	0.95 (0.02)	0.000383	0.63 (0.07)	0.00600487	0.93 (0.03)	0.00210439	0.93 (0.02)	0.0011955	0.95 (0.02)	0.00317908	0.94 (0.01)	0.00159039	0.93 (0.02)	0.000616	0.91 (0.03)	0.00266009
THPO	P585	0.000352302	0.91 (0.02)	-1.91667e-05	0.94 (0.01)	0.00124952	0.94 (0.03)	0.000229564	0.84 (0.12)	-3.8e-05	0.88 (0.03)	0.00051	0.93 (0.01)	0.000153252	0.88 (0.06)	-2.25333e-05	0.88 (0.02)	2.59574e-05	0.89 (0.02)	3.2475e-05	0.92 (0.01)	6.36667e-05	0.9 (0.03)	9.6997e-05
THY1	P149	0.000409418	0.1 (0.03)	4e-05	0.03 (0.01)	0.00130204	0.04 (0.03)	0.000223833	0.1 (0.05)	1.9e-05	0.07 (0.02)	0.000281475	0.12 (0.11)	-3.77444e-05	0.24 (0.06)	0.00189717	0.46 (0.18)	0.000575476	0.14 (0.12)	7.36001e-06	0.15 (0.11)	-7.68333e-05	0.11 (0.04)	0.000188543
THY1	P20	0.00120536	0.34 (0.04)	0.000206167	0.13 (0.03)	0.00339024	0.11 (0.1)	0.000985301	0.26 (0.1)	-0.000121	0.32 (0.04)	0.00117057	0.09 (0.02)	0.00403326	0.38 (0.05)	0.000354067	0.39 (0.05)	0.000131655	0.39 (0.06)	0.000100663	0.41 (0.03)	0.000318667	0.4 (0.07)	0.000653066
TIAM1	P117	4.01424e-05	0.08 (0.03)	-1.98333e-05	0.03 (0.01)	3.0332e-05	0.03 (0.01)	0.000129267	0.09 (0.11)	9e-06	0.06 (0.03)	4.2104e-06	0.03 (0.01)	0.000103745	0.08 (0.06)	4e-07	0.09 (0.06)	5.32015e-06	0.08 (0.03)	2.63777e-05	0.17 (0.19)	0.000191333	0.06 (0.02)	5.80572e-05
TIAM1	P188	3.24671e-05	0.03 (0.01)	0.000345667	0.07 (0.03)	5.72031e-06	0.05 (0.02)	-2.49722e-05	0.06 (0.05)	2e-06	0.05 (0.02)	9.87659e-09	0.08 (0.03)	0.000148141	0.06 (0.03)	-2.37667e-05	0.04 (0.03)	-2.46825e-07	0.06 (0.03)	-3.30119e-05	0.12 (0.15)	5.08333e-05	0.05 (0.02)	8.41056e-05
TIE1	E66	0.00402452	0.78 (0.11)	0.000849	0.26 (0.08)	0.00634654	0.8 (0.05)	0.00317268	0.83 (0.02)	0.000476	0.26 (0.08)	0.0055489	0.8 (0.12)	0.00218408	0.86 (0.04)	0.00213807	0.91 (0.04)	0.00436298	0.75 (0.12)	0.000827568	0.78 (0.13)	0.000971167	0.74 (0.06)	0.00377386
TIMP2	E394	0.00024322	0.04 (0.01)	8.95e-05	0.02 (0)	0.000610236	0.02 (0.01)	0.000453205	0.03 (0.01)	3.4e-05	0.02 (0.01)	8.31262e-06	0.03 (0.01)	0.000165621	0.04 (0.01)	0.000247967	0.05 (0.03)	0.000175748	0.04 (0.01)	6.74667e-05	0.04 (0.02)	-4.1e-05	0.04 (0.02)	0.000370282
TIMP2	P267	0.000132381	0.24 (0.03)	3.11667e-05	0.05 (0.03)	0.000432402	0.07 (0.08)	8.74659e-05	0.25 (0.15)	-4e-06	0.17 (0.04)	0.000145157	0.09 (0.07)	0.000207606	0.17 (0.07)	-6.07333e-05	0.27 (0.11)	8.74625e-06	0.27 (0.05)	0.000124856	0.23 (0.02)	9.96667e-05	0.23 (0.06)	2.285e-05
TIMP3	P1114	0.00147921	0.95 (0.01)	0.000326333	0.98 (0)	0.000325773	0.97 (0.01)	0.0032465	0.95 (0.02)	0.00012	0.96 (0.01)	5.54262e-05	0.96 (0)	0.00130894	0.95 (0.01)	0.000678067	0.66 (0.1)	0.0116838	0.95 (0.01)	0.000384508	0.96 (0)	0.000296667	0.95 (0.01)	0.000629856
TIMP3	P690	0.00124097	0.96 (0.01)	0.0001375	0.98 (0)	0.0002636	0.97 (0.01)	0.000671855	0.97 (0)	0.000218	0.97 (0.01)	3.68711e-05	0.95 (0.02)	0.000616009	0.95 (0.02)	0.0004373	0.75 (0.13)	0.0113109	0.96 (0.01)	0.000369369	0.96 (0.01)	0.000218333	0.95 (0.01)	0.000559414
TIMP3	S38	0.000319521	0.07 (0.04)	-0.000128667	0.03 (0.01)	0.000111569	0.03 (0.02)	0.000293942	0.07 (0.06)	-1.5e-05	0.04 (0.02)	2.2519e-05	0.05 (0.04)	0.000216363	0.05 (0.01)	0.000109	0.08 (0.04)	5.71684e-07	0.1 (0.02)	0.00078703	0.07 (0.02)	-0.000219667	0.09 (0.04)	0.000874251
TJP1	P326	7.41451e-05	0.07 (0.02)	2.95e-05	0.04 (0.01)	5.65531e-05	0.04 (0.02)	5.38357e-05	0.04 (0.01)	0.000103	0.08 (0.03)	1.66574e-05	0.05 (0.03)	5.44897e-05	0.07 (0.02)	-7.06667e-05	0.08 (0.04)	5.32814e-06	0.1 (0.03)	0.000213001	0.06 (0.01)	3.73333e-05	0.07 (0.02)	0.000151061
TJP1	P390	0.000339096	0.04 (0.01)	-3.71667e-05	0.03 (0.01)	7.79889e-07	0.02 (0.01)	0.00011184	0.03 (0)	8e-06	0.03 (0.01)	1.59137e-05	0.05 (0.04)	1.90706e-05	0.04 (0.02)	-5.8e-05	0.03 (0.01)	2.19809e-05	0.05 (0.03)	-0.000254352	0.04 (0.02)	9.38333e-05	0.05 (0.01)	0.00143855
TJP2	P330	0.00132653	0.13 (0.07)	0.000610333	0.02 (0)	0.000955507	0.02 (0.02)	0.00109498	0.05 (0.03)	-5.1e-05	0.04 (0.01)	0.000206811	0.02 (0)	0.00367968	0.05 (0.03)	-9.66e-05	0.06 (0.03)	6.14771e-06	0.09 (0.05)	-0.000198751	0.34 (0.28)	0.00136233	0.11 (0.05)	0.00364092
TJP2	P518	0.00118896	0.27 (0.16)	5.73333e-05	0.07 (0.02)	0.0056373	0.45 (0.24)	0.000271879	0.42 (0.23)	-2.9e-05	0.3 (0.06)	0.000900336	0.2 (0.09)	2.09056e-05	0.32 (0.11)	0.000124033	0.69 (0.11)	0.000595204	0.34 (0.17)	-3.41914e-06	0.52 (0.3)	0.000289167	0.37 (0.11)	0.000540166
TK1	E47	5.76789e-05	0.12 (0.03)	0.0001485	0.14 (0.02)	3.70666e-05	0.17 (0.02)	4.45143e-05	0.12 (0.03)	5.1e-05	0.16 (0.11)	-1.36492e-06	0.2 (0.02)	0.000318625	0.16 (0.09)	-2.77667e-05	0.16 (0.08)	-3.4482e-06	0.2 (0.07)	7.88919e-05	0.24 (0.09)	0.000444667	0.17 (0.04)	5.86873e-05
TK1	P62	0.00130787	0.06 (0.02)	0.000493833	0.01 (0)	0.00456125	0.02 (0.01)	0.00128752	0.03 (0)	0.00019	0.04 (0.02)	0.00100371	0.02 (0)	0.00356124	0.04 (0.01)	0.0004598	0.06 (0.04)	0.000243148	0.04 (0.01)	0.000436878	0.04 (0.01)	0.000190333	0.04 (0.01)	0.000450073
TM7SF3	P1068	0.00029797	0.88 (0.04)	6.68333e-05	0.66 (0.1)	0.000332409	0.87 (0.04)	0.000108976	0.95 (0.01)	0.00025	0.8 (0.06)	0.000108345	0.94 (0.05)	0.00156047	0.91 (0.02)	0.000135733	0.94 (0.03)	0.000183473	0.92 (0.01)	0.000319675	0.89 (0.04)	-8.16667e-06	0.9 (0.03)	0.000367773
TMEFF1	E180	0.000259049	0.03 (0)	3.3e-05	0.02 (0.01)	5.07424e-05	0.02 (0.01)	0.000109186	0.04 (0)	5.3e-05	0.02 (0.01)	6.28602e-06	0.03 (0.01)	1.34198e-05	0.04 (0)	1.66e-05	0.04 (0.01)	7.56743e-06	0.05 (0.02)	-0.00014674	0.03 (0.01)	-7.68333e-05	0.04 (0.01)	0.00106869
TMEFF1	P234	3.93362e-05	0.05 (0.02)	-2.88333e-05	0.03 (0.01)	8.66213e-05	0.03 (0.02)	9.9154e-05	0.03 (0)	0.000125	0.07 (0.03)	-3.99738e-06	0.05 (0.01)	5.86119e-05	0.08 (0.02)	7.6e-06	0.09 (0.05)	1.04799e-05	0.07 (0.03)	1.0833e-05	0.07 (0.03)	-7.55e-05	0.07 (0.02)	7.18309e-05
TMEFF1	P626	0.00186112	0.53 (0.09)	-0.000539667	0.33 (0.1)	0.000829094	0.41 (0.04)	0.00293424	0.49 (0.17)	3.7e-05	0.33 (0.06)	0.000966192	0.39 (0.05)	0.00340997	0.6 (0.06)	0.00127563	0.58 (0.11)	0.000349886	0.69 (0.05)	0.0029336	0.59 (0.02)	0.001001	0.65 (0.05)	0.00353489
TMEFF2	E94	7.77883e-05	0.11 (0.03)	-5.25e-05	0.1 (0.01)	1.38041e-05	0.1 (0.02)	4.71865e-05	0.03 (0)	0.000312	0.09 (0.03)	1.831e-06	0.14 (0.04)	0.000149252	0.1 (0.04)	-7.33e-05	0.15 (0.08)	9.59009e-06	0.14 (0.04)	0.000392758	0.1 (0.01)	0.0001465	0.11 (0.02)	0.000104286
TMEFF2	P152	0.000210231	0.14 (0.03)	-6.61667e-05	0.11 (0.02)	1.8159e-05	0.12 (0.1)	9.50968e-05	0.11 (0.02)	0.000127	0.11 (0.03)	5.38984e-05	0.15 (0.05)	-1.59492e-05	0.16 (0.04)	1.96333e-05	0.2 (0.08)	6.44259e-06	0.2 (0.04)	0.000172425	0.18 (0.1)	-0.000105667	0.18 (0.04)	0.000732391
TMEFF2	P210	8.32605e-05	0.14 (0.04)	0.000186667	0.06 (0.03)	6.63659e-05	0.07 (0.06)	0.000242036	0.4 (0.34)	-4e-06	0.16 (0.09)	2.78785e-06	0.18 (0.08)	-1.65968e-05	0.32 (0.1)	0.000193233	0.44 (0.16)	0.000103886	0.27 (0.1)	0.000242138	0.18 (0.12)	6.66667e-06	0.22 (0.06)	8.43848e-05
TMEM63A	E63	5.93355e-05	0.05 (0.01)	7.36667e-05	0.06 (0.01)	1.35188e-05	0.06 (0.01)	3.32667e-05	0.04 (0)	0.000175	0.1 (0.05)	3.05865e-06	0.09 (0.02)	0.000470412	0.06 (0.01)	-3.53667e-05	0.05 (0.02)	1.86354e-05	0.07 (0.04)	-4.76493e-05	0.05 (0.02)	1.41667e-05	0.05 (0.02)	0.000118106
TMPRSS4	E83	0.00111989	0.91 (0.03)	0.0001635	0.97 (0)	0.00504946	0.96 (0.01)	0.00143231	0.42 (0.29)	0.000322	0.94 (0.02)	0.000685323	0.78 (0.15)	0.000913213	0.9 (0.04)	0.0006228	0.93 (0.03)	0.000297614	0.93 (0.02)	0.000126319	0.84 (0.15)	0.000162	0.91 (0.03)	0.000333825
TMPRSS4	P552	0.000126857	0.89 (0.02)	6e-05	0.85 (0.05)	7.51287e-06	0.93 (0.05)	0.00068701	0.69 (0.36)	-6.4e-05	0.89 (0.03)	5.86154e-06	0.8 (0.12)	0.000194748	0.92 (0.01)	0.000663933	0.93 (0.02)	8.1023e-05	0.89 (0.04)	-3.23455e-05	0.83 (0.09)	0.000123333	0.88 (0.03)	0.000191132
TNC	P198	0.000248588	0.14 (0.08)	8.33333e-07	0.2 (0.08)	1.17417e-05	0.13 (0.09)	-9.63413e-06	0.12 (0.12)	-2e-05	0.15 (0.06)	2.85053e-07	0.17 (0.08)	-2.96286e-05	0.13 (0.02)	8.22667e-05	0.15 (0.07)	7.44494e-07	0.17 (0.04)	0.000215971	0.16 (0.06)	-6.83333e-06	0.13 (0.04)	0.000939608
TNC	P57	1.88626e-05	0.1 (0.04)	7.16667e-06	0.05 (0.02)	5.29003e-06	0.03 (0.02)	0.000157396	0.07 (0.07)	-7e-06	0.08 (0.03)	1.31187e-06	0.05 (0.04)	2.16405e-05	0.09 (0.03)	6.03333e-06	0.11 (0.07)	-8.30808e-07	0.11 (0.03)	5.99036e-05	0.07 (0.01)	3.21667e-05	0.09 (0.03)	1.70142e-06
TNF	P1084	0.000242723	0.95 (0.01)	8e-06	0.97 (0)	0.000801399	0.97 (0.01)	0.00040809	0.94 (0.04)	-4.9e-05	0.94 (0.02)	0.000375753	0.96 (0.01)	-3.18746e-05	0.95 (0.01)	8.55333e-05	0.93 (0.02)	9.21008e-05	0.95 (0.01)	2.29137e-05	0.95 (0.02)	-5.83333e-06	0.95 (0.01)	1.27721e-05
TNF	P158	0.000401604	0.11 (0.04)	0.000585333	0.03 (0.03)	0.000262745	0.47 (0.14)	0.000981101	0.04 (0.01)	0.000253	0.05 (0.04)	0.000195934	0.15 (0.07)	0.000317173	0.35 (0.1)	0.000833267	0.12 (0.09)	4.21178e-05	0.38 (0.13)	0.000759667	0.2 (0.15)	-6.56667e-05	0.31 (0.11)	0.000587239
TNFRSF10A	P171	0.000540941	0.19 (0.06)	6.11667e-05	0.03 (0.01)	0.000932626	0.45 (0.14)	0.00329268	0.04 (0)	0.000456	0.1 (0.06)	2.2953e-05	0.14 (0.04)	0.00046824	0.19 (0.03)	0.000284633	0.22 (0.11)	0.000110727	0.23 (0.11)	0.00124222	0.14 (0.04)	1.11667e-05	0.15 (0.08)	0.000321712
			Bladder (n=5)		Blood (n=30)		Brain (n=12)		Cervix (n=3)		Infant blood (n=55)		Head and neck (n=11)		Kidney (n=6)		Placenta (n=19)		Pleura (n=18)		Small intestine (n=5)		Lung (n=53)
GENE	CpG	Mean decrease in accuracy	Mean (sd)	Decrease in accuracy	Mean (sd)	Decrease in accuracy	Mean (sd)	Decrease in accuracy	Mean (sd)	Decrease in accuracy	Mean (sd)	Decrease in accuracy	Mean (sd)	Decrease in accuracy	Mean (sd)	Decrease in accuracy	Mean (sd)	Decrease in accuracy	Mean (sd)	Decrease in accuracy	Mean (sd)	Decrease in accuracy	Mean (sd)	Decrease in accuracy
TNFRSF10A	P91	0.00119262	0.25 (0.06)	0.000351333	0.03 (0.01)	0.00437172	0.23 (0.15)	0.000299744	0.11 (0.13)	-3.1e-05	0.17 (0.06)	0.000280244	0.1 (0.04)	0.000755308	0.24 (0.06)	0.00109357	0.16 (0.08)	0.00039759	0.23 (0.07)	0.00121601	0.18 (0.03)	0.0001465	0.16 (0.07)	0.00119882
TNFRSF10B	E198	0.000663656	0.11 (0.03)	-4.2e-05	0.03 (0.01)	0.000446849	0.06 (0.06)	4.19976e-05	0.06 (0.03)	2.2e-05	0.09 (0.03)	0.000124358	0.04 (0.01)	0.000757958	0.08 (0.04)	-0.000273	0.13 (0.05)	5.51682e-05	0.13 (0.02)	0.00424962	0.1 (0.05)	0.000399	0.09 (0.02)	0.000780613
TNFRSF10B	P108	7.65818e-05	0.13 (0.06)	-5.4e-05	0.07 (0.02)	5.62173e-05	0.11 (0.05)	-1.14778e-05	0.08 (0.07)	3.7e-05	0.14 (0.06)	1.32653e-06	0.09 (0.02)	4.56698e-05	0.09 (0.03)	9.9e-06	0.15 (0.07)	-1.82547e-06	0.16 (0.05)	0.000109461	0.11 (0.02)	3.61667e-05	0.12 (0.04)	0.000236583
TNFRSF10C	E109	0.000156495	0.08 (0.05)	-1.8e-05	0.04 (0.01)	3.74262e-05	0.08 (0.02)	2.7119e-06	0.03 (0)	0.000108	0.07 (0.04)	-8.99935e-07	0.09 (0.05)	-7.12222e-06	0.13 (0.06)	0.000518033	0.07 (0.05)	3.43506e-06	0.18 (0.18)	0.000328853	0.08 (0.04)	-4.83333e-05	0.08 (0.02)	0.000451549
TNFRSF10C	P612	8.15728e-05	0.93 (0.02)	2.48333e-05	0.92 (0.03)	2.53878e-05	0.93 (0.02)	-6.26825e-06	0.94 (0.02)	-9.9e-05	0.92 (0.11)	6.28572e-06	0.91 (0.02)	0.000317369	0.94 (0.01)	9.13667e-05	0.94 (0.05)	1.19275e-05	0.95 (0.01)	0.00048954	0.95 (0.01)	2.71667e-05	0.95 (0.01)	7.58006e-05
TNFRSF10C	P7	0.000327574	0.16 (0.05)	-2.35e-05	0.04 (0.01)	0.000748381	0.12 (0.06)	6.9554e-05	0.11 (0.07)	1.7e-05	0.08 (0.02)	8.10035e-05	0.07 (0.04)	6.67405e-05	0.4 (0.12)	0.00260053	0.13 (0.06)	8.92319e-05	0.27 (0.2)	0.000410685	0.16 (0.05)	0.0002145	0.13 (0.03)	0.000361998
TNFRSF10D	E27	0.000152429	0.09 (0.04)	9.91667e-05	0.04 (0.01)	8.91041e-05	0.31 (0.21)	0.00105007	0.04 (0)	0.000147	0.06 (0.03)	3.08545e-05	0.06 (0.02)	0.000181245	0.05 (0.02)	0.0002051	0.27 (0.16)	0.000232067	0.14 (0.12)	9.21282e-05	0.06 (0.02)	8e-05	0.08 (0.03)	9.57123e-05
TNFRSF10D	P70	0.000939619	0.18 (0.05)	0.00113383	0.08 (0.03)	6.46372e-05	0.68 (0.12)	0.0103023	0.11 (0.09)	-8e-06	0.09 (0.03)	4.09848e-05	0.15 (0.04)	0.000858465	0.1 (0.03)	0.0007237	0.53 (0.18)	0.00157031	0.19 (0.13)	0.000249468	0.12 (0.03)	4.28333e-05	0.11 (0.03)	0.000575961
TNFRSF1A	P678	0.0001334	0.84 (0.04)	6.01667e-05	0.79 (0.06)	2.18133e-05	0.93 (0.02)	0.000748344	0.87 (0.04)	-1.4e-05	0.77 (0.05)	0.000131128	0.81 (0.07)	0.000135506	0.89 (0.04)	0.000144867	0.93 (0.03)	0.000207322	0.88 (0.03)	6.4138e-05	0.89 (0.04)	0.000175833	0.85 (0.05)	6.4177e-05
TNFRSF1B	E5	2.87336e-05	0.11 (0.04)	-6.4e-05	0.08 (0.03)	4.4895e-06	0.08 (0.06)	2.53127e-05	0.04 (0.01)	0.000161	0.1 (0.03)	2.46637e-06	0.12 (0.03)	4.35159e-05	0.09 (0.04)	-1.68e-05	0.1 (0.06)	-2.35481e-06	0.13 (0.03)	0.000133019	0.09 (0.02)	-1.7e-05	0.11 (0.03)	5.01486e-05
TNFRSF1B	P167	0.000131354	0.09 (0.03)	8.58333e-05	0.02 (0.01)	0.000144772	0.13 (0.06)	0.000234656	0.06 (0.05)	-5.1e-05	0.06 (0.02)	1.72193e-05	0.03 (0.01)	0.000378817	0.07 (0.02)	-5.68333e-05	0.12 (0.05)	8.28362e-05	0.09 (0.03)	0.000114839	0.07 (0.02)	-6.93333e-05	0.07 (0.02)	0.000244469
TNFSF10	E53	0.00120829	0.24 (0.05)	0.00224	0.04 (0.02)	0.000113473	0.46 (0.19)	0.002874	0.03 (0)	0.000524	0.09 (0.04)	7.84667e-05	0.06 (0.02)	0.00199541	0.11 (0.04)	0.0009142	0.67 (0.15)	0.00268439	0.24 (0.12)	0.00230202	0.1 (0.06)	-0.000265667	0.13 (0.05)	0.00162751
TNFSF10	P2	0.00420703	0.65 (0.11)	0.00263167	0.08 (0.03)	0.00199609	0.84 (0.12)	0.00905903	0.25 (0.25)	0.000289	0.13 (0.07)	0.00129683	0.24 (0.12)	0.00243584	0.47 (0.08)	0.00251663	0.92 (0.05)	0.00697666	0.64 (0.14)	0.00921791	0.35 (0.2)	-0.000514333	0.49 (0.12)	0.00609593
TNFSF8	E258	0.0065398	0.86 (0.04)	0.0011855	0.06 (0.07)	0.0103673	0.93 (0.04)	0.00597251	0.86 (0.07)	0.000537	0.13 (0.08)	0.00842276	0.89 (0.09)	0.00491944	0.9 (0.03)	0.00288213	0.92 (0.03)	0.00717662	0.84 (0.06)	0.00324307	0.86 (0.04)	0.001126	0.83 (0.06)	0.00570468
TNFSF8	P184	0.00735288	0.72 (0.08)	0.00202883	0.02 (0)	0.0125307	0.76 (0.1)	0.00623125	0.72 (0.19)	0.00071	0.03 (0.01)	0.00863814	0.68 (0.16)	0.00505697	0.74 (0.04)	0.00344853	0.84 (0.13)	0.00786317	0.6 (0.13)	0.00278156	0.67 (0.13)	0.00147333	0.57 (0.09)	0.00724942
TNK1	P221	0.000609446	0.33 (0.09)	2.95e-05	0.44 (0.09)	3.90175e-05	0.46 (0.11)	0.000177931	0.35 (0.25)	-2.8e-05	0.53 (0.07)	6.79348e-05	0.24 (0.12)	0.000652055	0.23 (0.07)	0.0006878	0.86 (0.09)	0.00507785	0.4 (0.09)	0.000263278	0.36 (0.07)	6.8e-05	0.39 (0.1)	0.000280865
TNK1	P41	0.00067397	0.11 (0.05)	5.06667e-05	0.14 (0.06)	2.57796e-05	0.11 (0.05)	0.000366621	0.04 (0)	0.00022	0.16 (0.07)	1.54658e-05	0.14 (0.09)	0.00024813	0.09 (0.06)	0.000231433	0.8 (0.16)	0.00615731	0.13 (0.04)	0.000189167	0.15 (0.06)	6e-05	0.14 (0.06)	0.000293342
TP73	E155	0.00043283	0.08 (0.03)	0.000197333	0.02 (0.01)	0.000339014	0.03 (0.02)	0.000595775	0.07 (0.02)	4.6e-05	0.06 (0.02)	8.88771e-05	0.03 (0)	0.00328215	0.06 (0.02)	0.000290367	0.06 (0.03)	1.40544e-05	0.07 (0.02)	0.000321227	0.05 (0.01)	0.000206167	0.06 (0.01)	0.000515712
TP73	P496	0.000114378	0.06 (0.02)	8.46667e-05	0.03 (0.01)	5.46565e-05	0.03 (0.02)	0.000293873	0.1 (0.08)	-6.3e-05	0.04 (0.02)	6.72943e-06	0.03 (0.01)	0.000412329	0.08 (0.02)	0.000164067	0.12 (0.05)	7.55669e-05	0.08 (0.02)	0.000155481	0.06 (0.01)	2.16667e-05	0.07 (0.02)	0.000165189
TP73	P945	0.000224711	0.11 (0.01)	0.000241167	0.06 (0.02)	2.66692e-05	0.07 (0.06)	0.0001281	0.12 (0.07)	-0.000105	0.08 (0.02)	9.22593e-05	0.06 (0.02)	0.000406887	0.12 (0.03)	-2.22667e-05	0.33 (0.13)	0.000851749	0.17 (0.05)	0.000704573	0.1 (0.02)	0.000137333	0.13 (0.03)	8.41677e-05
TPEF	S36	0.000216921	0.04 (0.01)	-3.08333e-05	0.02 (0)	0.000215918	0.03 (0.02)	0.000243782	0.04 (0)	3.2e-05	0.03 (0.01)	0.000123177	0.04 (0.02)	2.24063e-05	0.05 (0.01)	2.97333e-05	0.09 (0.06)	8.87334e-05	0.06 (0.01)	0.000173446	0.06 (0.03)	-2.96667e-05	0.05 (0.01)	0.000480721
TPEF	S88	0.000649983	0.08 (0.01)	0.000240667	0.05 (0.01)	0.00031413	0.07 (0.15)	0.00124954	0.08 (0.06)	-4.3e-05	0.05 (0.02)	0.000349357	0.12 (0.07)	5.10643e-05	0.1 (0.03)	0.000225833	0.57 (0.16)	0.0025354	0.15 (0.04)	0.000452305	0.18 (0.15)	-0.000179333	0.14 (0.08)	0.000735947
TRAF4	P372	0.000503731	0.4 (0.06)	0.000289667	0.13 (0.03)	0.00062775	0.14 (0.08)	0.000840407	0.31 (0.08)	8.3e-05	0.35 (0.07)	0.000147195	0.12 (0.02)	0.00337316	0.35 (0.05)	0.000375633	0.27 (0.07)	7.90046e-05	0.42 (0.07)	0.000699844	0.38 (0.08)	0.000108333	0.35 (0.06)	0.000344231
TRIM29	E189	0.000429504	0.86 (0.02)	0.000104167	0.93 (0.03)	0.000199154	0.86 (0.04)	0.000163479	0.43 (0.26)	0.000522	0.88 (0.02)	9.12185e-05	0.67 (0.16)	0.000559688	0.74 (0.09)	0.000335	0.49 (0.09)	0.00186138	0.84 (0.06)	7.25413e-05	0.83 (0.1)	-4.06667e-05	0.87 (0.03)	0.000601754
TRIM29	P135	0.000287985	0.91 (0.02)	-6.13333e-05	0.92 (0.01)	3.88737e-05	0.94 (0.02)	0.00153453	0.31 (0.43)	0.000282	0.92 (0.02)	9.08028e-05	0.76 (0.1)	0.00109912	0.86 (0.04)	0.000228	0.66 (0.09)	0.00066645	0.88 (0.04)	-2.30346e-05	0.85 (0.1)	-2.61667e-05	0.88 (0.03)	0.000236984
TRIM29	P261	0.00127901	0.89 (0.05)	0.000165333	0.97 (0.01)	0.00341517	0.92 (0.06)	-7.31421e-05	0.35 (0.31)	0.000771	0.94 (0.02)	0.000346082	0.62 (0.21)	0.0017464	0.73 (0.1)	0.00184453	0.44 (0.13)	0.0027661	0.89 (0.08)	0.000215701	0.88 (0.08)	5.83333e-05	0.92 (0.03)	0.00124417
TRIP6	E33	0.000186814	0.09 (0.04)	0.000180333	0.09 (0.03)	9.301e-07	0.09 (0.03)	2.25143e-05	0.06 (0.05)	-7.1e-05	0.1 (0.03)	8.66636e-06	0.09 (0.04)	8.54706e-05	0.08 (0.02)	0.0001263	0.11 (0.04)	-2.55178e-06	0.16 (0.07)	0.000131178	0.1 (0.04)	-0.000122167	0.15 (0.05)	0.000677851
TRIP6	P1090	0.00833511	0.75 (0.05)	0.00145483	0.31 (0.12)	0.00784276	0.6 (0.15)	0.00509734	0.49 (0.27)	0.000674	0.96 (0.02)	0.015425	0.42 (0.16)	0.00509816	0.77 (0.08)	0.0016243	0.95 (0.03)	0.0125255	0.62 (0.13)	0.0032888	0.72 (0.09)	0.00126	0.61 (0.11)	0.00575825
TRIP6	P1274	0.00792327	0.62 (0.13)	0.00126117	0.57 (0.1)	0.00745819	0.6 (0.15)	0.00436559	0.58 (0.21)	0.000574	0.91 (0.02)	0.0173869	0.48 (0.17)	0.00440566	0.71 (0.08)	0.00253577	0.87 (0.04)	0.00590266	0.54 (0.1)	0.00317309	0.66 (0.08)	0.00116983	0.58 (0.09)	0.00506053
TRPM5	E87	0.000346448	0.9 (0.02)	-2e-06	0.93 (0.01)	2.92422e-05	0.93 (0.01)	0.000596887	0.9 (0.05)	-1.7e-05	0.92 (0.02)	3.60226e-05	0.9 (0.03)	0.000208529	0.9 (0.03)	8.34e-05	0.77 (0.08)	0.0025891	0.91 (0.03)	-1.11625e-05	0.86 (0.07)	1e-06	0.91 (0.02)	0.00026587
TRPM5	P721	0.00029204	0.74 (0.05)	6.15e-05	0.9 (0.04)	0.000455793	0.74 (0.08)	0.000220442	0.61 (0.4)	-5.1e-05	0.88 (0.03)	0.000318251	0.77 (0.04)	0.000242791	0.7 (0.04)	0.000193233	0.53 (0.17)	0.000419117	0.76 (0.06)	9.61247e-05	0.7 (0.14)	8.93333e-05	0.74 (0.08)	0.000277407
TRPM5	P979	0.000950697	0.87 (0.04)	-0.000142333	0.93 (0.01)	0.00398662	0.92 (0.03)	0.00185985	0.69 (0.19)	0.000109	0.88 (0.02)	0.000783221	0.84 (0.08)	0.000417296	0.84 (0.06)	0.000144733	0.78 (0.06)	0.000226592	0.82 (0.04)	0.000633276	0.85 (0.07)	8.86667e-05	0.86 (0.05)	9.20668e-05
TSC2	E140	0.00102549	0.28 (0.05)	0.000316167	0.63 (0.13)	0.000322639	0.3 (0.13)	0.000527416	0.53 (0.28)	-0.000133	0.69 (0.06)	0.00232498	0.28 (0.14)	0.000702797	0.17 (0.08)	0.0008782	0.15 (0.08)	0.0011988	0.37 (0.11)	0.000103034	0.3 (0.11)	0.000154667	0.32 (0.08)	0.000798452
TSG101	P139	4.58952e-05	0.06 (0.01)	-6.16667e-06	0.04 (0.01)	0.000101894	0.06 (0.03)	-7.93651e-10	0.04 (0)	0.000212	0.08 (0.03)	2.45428e-06	0.05 (0.01)	0.000116609	0.08 (0.03)	-5.54333e-05	0.1 (0.03)	2.45553e-05	0.08 (0.02)	0.000149448	0.07 (0.02)	2.9e-05	0.07 (0.02)	3.65464e-05
TSG101	P257	0.00020037	0.41 (0.09)	7.51667e-05	0.15 (0.08)	5.10982e-05	0.19 (0.12)	1.70873e-05	0.13 (0.17)	1.5e-05	0.26 (0.11)	4.0162e-07	0.17 (0.08)	0.000343237	0.25 (0.11)	-1.01667e-05	0.32 (0.13)	2.04194e-06	0.36 (0.07)	8.21628e-06	0.37 (0.08)	6.33333e-06	0.36 (0.06)	0.000708798
TSP50	E21	3.23779e-05	0.75 (0.09)	-4.26667e-05	0.87 (0.05)	3.33633e-05	0.75 (0.11)	-4.66342e-06	0.66 (0.11)	4.1e-05	0.75 (0.06)	3.19717e-05	0.83 (0.06)	3.14825e-05	0.75 (0.09)	-2.74667e-05	0.59 (0.14)	8.32369e-05	0.79 (0.06)	3.83235e-06	0.77 (0.08)	-4.8e-05	0.79 (0.06)	5.29769e-05
TSP50	P137	2.99734e-05	0.49 (0.15)	-2.86667e-05	0.63 (0.2)	1.79252e-06	0.57 (0.19)	1.61032e-06	0.29 (0.23)	4.6e-05	0.49 (0.16)	2.59477e-06	0.54 (0.16)	5.45238e-07	0.51 (0.18)	-2.79e-05	0.23 (0.1)	0.000158542	0.59 (0.17)	5.49079e-05	0.36 (0.16)	4.43333e-05	0.51 (0.14)	3.69368e-05
TUBB3	E91	1.22398e-05	0.31 (0.06)	4.36667e-05	0.2 (0.16)	1.11285e-06	0.19 (0.16)	1.53643e-05	0.15 (0.15)	-1e-06	0.18 (0.14)	1.21688e-05	0.12 (0.14)	3.87214e-05	0.27 (0.12)	1.69e-05	0.09 (0.05)	4.7106e-05	0.27 (0.15)	6.24118e-05	0.23 (0.1)	4.16667e-06	0.22 (0.14)	-1.42345e-05
TUBB3	P364	0.000404882	0.03 (0.01)	8.15e-05	0.01 (0)	0.000679241	0.02 (0.01)	0.000158198	0.04 (0.01)	8.1e-05	0.02 (0.01)	6.57964e-06	0.02 (0)	-3.61563e-05	0.03 (0.01)	0.0001486	0.03 (0.01)	0.000118678	0.03 (0.01)	-0.000226973	0.02 (0.01)	-8.55e-05	0.03 (0)	0.00129017
TUBB3	P721	0.000384302	0.13 (0.04)	4.36667e-05	0.05 (0.03)	0.000659634	0.05 (0.04)	0.000587013	0.23 (0.16)	-2.2e-05	0.21 (0.06)	0.000284315	0.04 (0.02)	0.00192488	0.15 (0.03)	0.000226733	0.31 (0.12)	8.79071e-05	0.19 (0.04)	0.000221581	0.16 (0.05)	5.8e-05	0.15 (0.04)	0.000234239
TUSC3	E29	0.000163011	0.14 (0.04)	0.0001095	0.09 (0.06)	-1.2186e-06	0.09 (0.16)	0.000217484	0.15 (0.21)	1.9e-05	0.07 (0.03)	1.89876e-05	0.19 (0.16)	2.61849e-05	0.09 (0.05)	-6.50333e-05	0.14 (0.17)	-4.55221e-06	0.15 (0.06)	-0.000205674	0.32 (0.35)	4.16667e-05	0.15 (0.06)	0.000668006
TUSC3	P85	0.00010261	0.15 (0.03)	9.36667e-05	0.08 (0.05)	1.56223e-05	0.04 (0.03)	0.0012392	0.16 (0.01)	8.7e-05	0.12 (0.04)	5.40243e-06	0.14 (0.09)	-3.06222e-05	0.11 (0.03)	3.00667e-05	0.16 (0.12)	-8.69458e-07	0.16 (0.04)	0.000146778	0.23 (0.17)	9.43333e-05	0.13 (0.03)	6.87564e-05
TWIST1	E117	4.30679e-05	0.04 (0.03)	2.76667e-05	0.02 (0.01)	2.91376e-05	0.08 (0.2)	0.000233222	0.14 (0.19)	-1.8e-05	0.05 (0.03)	1.59479e-05	0.04 (0.02)	-2.02119e-05	0.08 (0.06)	7.84667e-05	0.06 (0.05)	9.69892e-06	0.07 (0.03)	5.99184e-05	0.11 (0.14)	-8.58333e-05	0.07 (0.06)	5.67809e-05
TWIST1	P355	0.000114537	0.09 (0.04)	2.21667e-05	0.05 (0.02)	3.43566e-05	0.11 (0.13)	2.33667e-05	0.05 (0)	0.000127	0.07 (0.03)	0.000108729	0.13 (0.04)	2.55421e-05	0.17 (0.06)	0.000116567	0.24 (0.09)	6.68694e-05	0.15 (0.04)	4.36947e-05	0.18 (0.17)	-1.06667e-05	0.15 (0.03)	0.000261735
TWIST1	P44	7.00736e-06	0.06 (0.03)	-4.68333e-05	0.06 (0.01)	1.02559e-05	0.11 (0.12)	6.96349e-06	0.05 (0)	8.9e-05	0.07 (0.03)	4.98138e-07	0.08 (0.02)	-6.46429e-06	0.1 (0.07)	-2.72333e-05	0.07 (0.04)	-3.69597e-07	0.08 (0.04)	5.42949e-06	0.11 (0.13)	6.05e-05	0.08 (0.06)	1.66774e-05
TYK2	P494	0.00015912	0.31 (0.22)	-1.61667e-05	0.12 (0.05)	6.75368e-06	0.15 (0.06)	-1.65159e-05	0.18 (0.26)	5.7e-05	0.16 (0.08)	3.80703e-06	0.09 (0.03)	0.000259226	0.19 (0.11)	-7.61e-05	0.13 (0.05)	1.36501e-05	0.2 (0.06)	-0.000232101	0.28 (0.09)	0.000102833	0.22 (0.08)	0.000675417
TYRO3	P366	4.42017e-05	0.1 (0.08)	7.23333e-05	0.11 (0.04)	1.54304e-06	0.06 (0.04)	0.000122557	0.04 (0.01)	0.000186	0.15 (0.05)	7.76383e-06	0.08 (0.04)	6.79325e-05	0.11 (0.03)	6.29667e-05	0.15 (0.1)	-3.54341e-06	0.15 (0.05)	-6.24026e-06	0.15 (0.02)	0.000290667	0.16 (0.04)	7.7408e-05
TYRO3	P501	9.16602e-05	0.05 (0.03)	4.7e-05	0.02 (0.01)	6.95536e-06	0.01 (0)	0.000775543	0.04 (0.02)	5e-06	0.02 (0.02)	1.79163e-06	0.02 (0.01)	-7.04e-05	0.03 (0.01)	0.0001449	0.05 (0.03)	6.37137e-05	0.04 (0.01)	5.74995e-05	0.03 (0.01)	6.18333e-05	0.03 (0.01)	0.000131635
UBA52	P293	1.86031e-05	0.07 (0.04)	-3.93333e-05	0.09 (0.02)	2.31428e-05	0.11 (0.04)	9.83413e-06	0.22 (0.28)	-3e-05	0.16 (0.08)	1.36485e-06	0.11 (0.03)	4.93587e-05	0.13 (0.05)	1.73e-05	0.12 (0.1)	1.39536e-06	0.09 (0.03)	3.03215e-05	0.06 (0.04)	0.000147667	0.09 (0.03)	3.05211e-05
UGT1A1	E11	3.65204e-05	0.96 (0.02)	7.16667e-05	0.97 (0)	1.2033e-05	0.97 (0)	0.000130518	0.96 (0.01)	-4.2e-05	0.96 (0.01)	1.87795e-06	0.97 (0)	-7.63492e-07	0.97 (0.01)	-5.55333e-05	0.94 (0.03)	5.29628e-05	0.97 (0)	0.000192549	0.93 (0.06)	1.33333e-05	0.97 (0.01)	3.08271e-05
UGT1A1	P315	0.000218919	0.87 (0.02)	4.58333e-05	0.92 (0.02)	0.000105554	0.79 (0.07)	0.000298001	0.89 (0.03)	-8e-06	0.92 (0.02)	0.000212003	0.84 (0.05)	4.89619e-05	0.86 (0.04)	5.47667e-05	0.68 (0.05)	0.00101388	0.87 (0.03)	5.33493e-05	0.85 (0.08)	-3.18333e-05	0.86 (0.03)	0.000134131
UGT1A1	P564	5.70834e-05	0.91 (0.02)	0.000229333	0.96 (0.02)	7.33758e-05	0.88 (0.04)	0.000188985	0.92 (0.01)	2e-06	0.91 (0.02)	3.30658e-05	0.95 (0.02)	4.90833e-05	0.9 (0.03)	0.000141933	0.92 (0.03)	4.2746e-06	0.94 (0.02)	0.000119684	0.94 (0.01)	1.68333e-05	0.93 (0.03)	1.78804e-05
UGT1A7	P751	0.000119757	0.96 (0.01)	4.01667e-05	0.97 (0)	4.64315e-05	0.97 (0.01)	9.15754e-05	0.96 (0.01)	-4.1e-05	0.96 (0.01)	7.26878e-06	0.96 (0.01)	6.88929e-05	0.95 (0.01)	0.00171643	0.92 (0.04)	0.000231645	0.97 (0.01)	0.000413056	0.97 (0)	0.000162	0.97 (0.01)	1.08882e-05
UNG	P170	0.000386191	0.08 (0.03)	-7.18333e-05	0.03 (0.01)	8.13135e-05	0.03 (0.03)	0.000457278	0.03 (0)	0.000168	0.05 (0.03)	6.12651e-06	0.04 (0.01)	0.000643921	0.09 (0.04)	0.000122867	0.06 (0.04)	-2.16414e-06	0.09 (0.02)	-0.000119673	0.08 (0.02)	-6.43333e-05	0.08 (0.02)	0.00134016
USP29	E274	0.00120268	0.92 (0.02)	0.000436833	0.97 (0.01)	0.00327056	0.96 (0.01)	0.000642377	0.94 (0.01)	6.5e-05	0.9 (0.02)	0.00164474	0.97 (0)	0.00227751	0.92 (0.03)	0.000420533	0.82 (0.07)	0.00111001	0.92 (0.04)	0.000190344	0.94 (0.01)	0.000342	0.94 (0.02)	0.000188481
USP29	P205	7.22116e-05	0.83 (0.03)	1.23333e-05	0.87 (0.02)	3.23623e-05	0.87 (0.03)	1.45413e-05	0.88 (0.05)	-3.6e-05	0.81 (0.02)	0.000182253	0.88 (0.01)	0.000248576	0.84 (0.06)	-3.04667e-05	0.79 (0.09)	1.87099e-05	0.86 (0.03)	1.97404e-05	0.84 (0.01)	2.66667e-05	0.85 (0.03)	2.31445e-05
USP29	P282	2.21009e-05	0.92 (0.02)	-2e-05	0.94 (0.01)	1.00212e-05	0.94 (0.01)	9.31159e-05	0.94 (0.01)	-1.6e-05	0.91 (0.02)	1.11964e-05	0.93 (0.01)	1.64246e-05	0.93 (0.01)	1.71667e-05	0.92 (0.02)	2.78834e-05	0.94 (0.02)	7.18268e-06	0.94 (0.01)	1.28333e-05	0.94 (0.01)	3.70314e-05
VAMP8	E7	0.000904576	0.73 (0.07)	0.00112317	0.3 (0.06)	0.00230797	0.82 (0.05)	0.00286756	0.57 (0.26)	-0.000315	0.49 (0.07)	9.54264e-05	0.59 (0.09)	0.000325617	0.64 (0.07)	0.000540167	0.63 (0.11)	0.000311423	0.61 (0.08)	0.000147798	0.72 (0.04)	0.00158283	0.58 (0.06)	0.00115604
VAMP8	P114	0.00172362	0.62 (0.07)	0.00245283	0.03 (0.01)	0.00383357	0.77 (0.11)	0.004663	0.18 (0.13)	-0.000251	0.07 (0.03)	0.001188	0.44 (0.12)	0.00148378	0.38 (0.09)	0.000778633	0.14 (0.06)	0.000454892	0.36 (0.13)	0.000779274	0.44 (0.15)	0.000635667	0.29 (0.08)	0.00161852
VAMP8	P241	0.00213993	0.72 (0.05)	0.00472433	0.44 (0.1)	3.01794e-05	0.89 (0.05)	0.011132	0.45 (0.2)	-0.000174	0.39 (0.07)	9.86326e-05	0.7 (0.11)	0.00412441	0.47 (0.09)	0.0010197	0.19 (0.05)	0.00628074	0.54 (0.08)	0.00014927	0.64 (0.11)	0.00225617	0.45 (0.09)	0.00246654
VAV1	E9	0.00582249	0.57 (0.12)	0.001094	0.02 (0)	0.00835143	0.78 (0.06)	0.00520664	0.16 (0.12)	-0.000429	0.02 (0.01)	0.00670388	0.34 (0.15)	0.00434921	0.69 (0.06)	0.00253817	0.92 (0.04)	0.0103783	0.7 (0.08)	0.00308066	0.46 (0.21)	0.001109	0.59 (0.11)	0.00505501
VAV1	P317	0.00312671	0.66 (0.07)	0.000691667	0.13 (0.07)	0.00559017	0.82 (0.04)	0.00292141	0.45 (0.04)	0.000423	0.25 (0.08)	0.00311265	0.64 (0.14)	0.00217853	0.76 (0.04)	0.00141623	0.91 (0.04)	0.00418426	0.76 (0.14)	0.000971481	0.58 (0.21)	0.0002425	0.73 (0.08)	0.00326215
VAV2	E58	6.24755e-05	0.04 (0.01)	-9.01667e-05	0.04 (0)	3.82317e-05	0.04 (0.01)	2.96484e-05	0.03 (0.01)	3.2e-05	0.03 (0.01)	3.46197e-05	0.05 (0.01)	0.000101276	0.05 (0.01)	0.000100367	0.05 (0.02)	1.67364e-06	0.06 (0.02)	-4.53095e-05	0.06 (0.02)	6.78333e-05	0.06 (0.04)	0.000166648
VAV2	P1182	6.51096e-05	0.04 (0.01)	1.66667e-05	0.06 (0.02)	2.58728e-05	0.11 (0.03)	0.000445756	0.09 (0.1)	-8.6e-05	0.05 (0.03)	3.8041e-06	0.08 (0.02)	0.000500271	0.04 (0.01)	0.000124	0.05 (0.04)	2.28273e-06	0.06 (0.04)	-2.17834e-05	0.04 (0.01)	9.46667e-05	0.04 (0.01)	2.1004e-05
VEGFB	P658	0.000290892	0.04 (0.01)	0.000137	0.02 (0.01)	0.000553473	0.04 (0.02)	2.23802e-05	0.04 (0.03)	-3.4e-05	0.1 (0.04)	0.000609448	0.03 (0.01)	0.000220711	0.04 (0.01)	-8.93333e-06	0.06 (0.03)	-7.89668e-06	0.06 (0.02)	3.84977e-05	0.05 (0.01)	6.6e-05	0.05 (0.02)	0.000154986
VIM	P343	0.000123154	0.03 (0.01)	-5.95e-05	0.01 (0)	0.000190901	0.02 (0.01)	0.000133624	0.03 (0)	4.1e-05	0.03 (0.01)	6.44827e-06	0.02 (0.01)	0.000101108	0.03 (0.01)	-3.13e-05	0.1 (0.08)	0.000188932	0.05 (0.01)	0.000688106	0.03 (0.01)	-0.000101833	0.03 (0.01)	6.22973e-05
VIM	P811	0.00023351	0.04 (0.01)	0.000165333	0.02 (0)	0.00112863	0.03 (0.02)	7.43286e-05	0.04 (0.01)	1.3e-05	0.03 (0.01)	0.000136829	0.03 (0.01)	9.2219e-05	0.05 (0.02)	0.0001126	0.04 (0.02)	7.86006e-05	0.04 (0.01)	7.4016e-05	0.03 (0)	2.08333e-05	0.03 (0.01)	5.71683e-05
WEE1	P924	0.000440507	0.9 (0.02)	-2.8e-05	0.96 (0.01)	0.00138983	0.91 (0.04)	7.01587e-07	0.81 (0.1)	0.000118	0.93 (0.02)	0.000171272	0.82 (0.08)	0.000392403	0.83 (0.07)	0.00111567	0.82 (0.07)	0.000670741	0.91 (0.04)	8.29062e-06	0.91 (0.03)	-8.05e-05	0.92 (0.02)	0.000362151
WNT1	E157	0.00016997	0.1 (0.04)	-4.63333e-05	0.05 (0.01)	6.91223e-05	0.09 (0.06)	3.82619e-06	0.07 (0.02)	4.2e-05	0.11 (0.05)	-1.5122e-06	0.07 (0.03)	9.57929e-05	0.09 (0.03)	6.73333e-06	0.2 (0.14)	8.64044e-06	0.18 (0.08)	0.000610397	0.11 (0.04)	-0.000159833	0.11 (0.03)	0.000458586
WNT1	P79	0.000193	0.18 (0.03)	4.83333e-06	0.14 (0.02)	1.00602e-05	0.11 (0.03)	0.000106553	0.19 (0.15)	-7.3e-05	0.12 (0.02)	8.07195e-05	0.12 (0.02)	0.000217625	0.17 (0.03)	2.38333e-05	0.29 (0.1)	0.000176001	0.23 (0.1)	8.71931e-05	0.15 (0.05)	-3.35e-05	0.18 (0.04)	0.000534828
WNT10B	P823	0.00230131	0.61 (0.06)	0.00105033	0.2 (0.13)	0.000523252	0.59 (0.13)	0.0018387	0.54 (0.15)	-0.000193	0.12 (0.04)	0.00284672	0.57 (0.21)	0.000601759	0.6 (0.09)	0.00196603	0.74 (0.09)	0.00488022	0.59 (0.14)	0.000895555	0.59 (0.14)	0.000166333	0.45 (0.09)	0.00321199
WNT10B	P993	0.00337691	0.13 (0.03)	-0.000403833	0.03 (0.01)	0.00343638	0.15 (0.08)	0.00124207	0.05 (0)	0.000763	0.09 (0.03)	0.000297757	0.12 (0.05)	-2.01611e-05	0.18 (0.04)	0.00474547	0.16 (0.06)	0.00191957	0.16 (0.04)	0.0118718	0.13 (0.07)	0.00100483	0.1 (0.02)	0.00623318
WNT2	P217	2.40943e-05	0.12 (0.04)	-4.36667e-05	0.08 (0.01)	2.09919e-05	0.08 (0.04)	7.93611e-05	0.05 (0.01)	0.00027	0.1 (0.03)	7.83636e-07	0.14 (0.08)	5.18373e-05	0.09 (0.04)	-4.44667e-05	0.22 (0.21)	8.66131e-06	0.15 (0.05)	7.84677e-05	0.1 (0.02)	3.66667e-06	0.11 (0.03)	1.81134e-05
WNT2B	P1185	0.000345632	0.13 (0.02)	0.000161833	0.03 (0.01)	0.000932238	0.05 (0.03)	0.000283672	0.09 (0)	0.000124	0.13 (0.06)	0.000221906	0.05 (0.02)	0.00154586	0.14 (0.03)	0.0003103	0.17 (0.08)	3.20527e-05	0.14 (0.04)	0.000137469	0.14 (0.04)	0.0001445	0.12 (0.03)	0.000137166
WNT2B	P1195	0.000652126	0.05 (0.02)	-0.000166333	0.01 (0)	0.00238312	0.02 (0.01)	0.000602563	0.03 (0)	0.000128	0.03 (0.01)	0.000466818	0.02 (0)	0.00101106	0.04 (0.01)	5.50333e-05	0.05 (0.02)	9.79194e-05	0.05 (0.01)	0.00101392	0.04 (0.01)	0.000118	0.04 (0.01)	0.000119608
WNT5A	E43	0.000334773	0.07 (0.02)	-5.56667e-05	0.03 (0.01)	0.000237748	0.03 (0.02)	0.000808156	0.09 (0.09)	4.1e-05	0.09 (0.03)	4.6754e-05	0.04 (0.01)	0.00130049	0.09 (0.03)	-3.55667e-05	0.12 (0.05)	1.71001e-05	0.11 (0.03)	0.000214395	0.08 (0.03)	-0.0001525	0.09 (0.03)	0.000687231
WNT5A	P655	0.000127045	0.03 (0.01)	-7.63333e-05	0.03 (0.03)	5.12738e-06	0.06 (0.1)	0.000144222	0.03 (0)	6.5e-05	0.04 (0.02)	2.15532e-06	0.03 (0.01)	0.000132213	0.04 (0.01)	-1.03333e-05	0.03 (0.01)	1.53727e-05	0.05 (0.02)	3.46087e-05	0.03 (0.01)	0.000175	0.04 (0.01)	0.000410681
WNT8B	E487	0.000225087	0.83 (0.02)	0.000167	0.92 (0.02)	0.000229634	0.92 (0.03)	0.000500679	0.88 (0.03)	5e-06	0.86 (0.03)	8.76163e-05	0.88 (0.03)	6.10087e-05	0.85 (0.04)	2.06667e-06	0.69 (0.08)	0.00102069	0.83 (0.03)	1.36652e-05	0.86 (0.03)	-5e-05	0.83 (0.04)	0.00014996
WNT8B	P216	3.30234e-05	0.93 (0.01)	0.000128333	0.96 (0.01)	3.92661e-05	0.95 (0.01)	-1.68325e-05	0.96 (0.01)	9.7e-05	0.94 (0.02)	2.80579e-05	0.93 (0.01)	0.000214919	0.94 (0.01)	4.04333e-05	0.95 (0.01)	1.97369e-06	0.95 (0.01)	1.4171e-05	0.95 (0.01)	-3.88333e-05	0.95 (0.01)	1.59142e-05
WRN	E57	2.28137e-05	0.14 (0.06)	-5.15e-05	0.08 (0.03)	1.32615e-05	0.08 (0.04)	3.51605e-05	0.06 (0)	0.000117	0.15 (0.07)	1.33547e-06	0.08 (0.03)	3.57913e-05	0.11 (0.04)	5.6e-06	0.17 (0.08)	6.10051e-06	0.16 (0.05)	7.37273e-05	0.14 (0.04)	-2.63333e-05	0.12 (0.03)	4.09332e-05
WRN	P969	0.000884166	0.92 (0.02)	0.000211833	0.97 (0.01)	0.00277973	0.51 (0.2)	0.00388597	0.95 (0.01)	0.000143	0.94 (0.02)	7.23235e-05	0.93 (0.03)	0.000493324	0.83 (0.06)	0.0015864	0.85 (0.05)	0.000599738	0.92 (0.02)	0.000307677	0.93 (0.01)	0.0002175	0.92 (0.02)	0.000487483
WT1	E32	0.000192404	0.06 (0.02)	-3.13333e-05	0.04 (0.01)	8.16604e-05	0.05 (0.03)	7.70603e-05	0.23 (0.28)	7.3e-05	0.03 (0.01)	3.0349e-05	0.11 (0.09)	0.000160667	0.08 (0.06)	1.35667e-05	0.13 (0.09)	7.60314e-05	0.06 (0.02)	-0.000172436	0.09 (0.09)	-8.2e-05	0.06 (0.02)	0.000702358
			Bladder (n=5)		Blood (n=30)		Brain (n=12)		Cervix (n=3)		Infant blood (n=55)		Head and neck (n=11)		Kidney (n=6)		Placenta (n=19)		Pleura (n=18)		Small intestine (n=5)		Lung (n=53)
GENE	CpG	Mean decrease in accuracy	Mean (sd)	Decrease in accuracy	Mean (sd)	Decrease in accuracy	Mean (sd)	Decrease in accuracy	Mean (sd)	Decrease in accuracy	Mean (sd)	Decrease in accuracy	Mean (sd)	Decrease in accuracy	Mean (sd)	Decrease in accuracy	Mean (sd)	Decrease in accuracy	Mean (sd)	Decrease in accuracy	Mean (sd)	Decrease in accuracy	Mean (sd)	Decrease in accuracy
WT1	P853	8.46698e-05	0.07 (0.03)	-4.5e-05	0.04 (0.03)	2.09076e-05	0.03 (0.01)	0.000749132	0.04 (0)	0.000128	0.08 (0.07)	4.66899e-06	0.1 (0.05)	3.03714e-05	0.09 (0.04)	2.06667e-05	0.3 (0.22)	1.14007e-05	0.1 (0.05)	-8.85416e-06	0.24 (0.29)	1.11667e-05	0.11 (0.06)	0.000141599
XPC	P226	0.000320319	0.81 (0.03)	0.000643333	0.87 (0.02)	3.22786e-05	0.77 (0.06)	0.000907412	0.84 (0.01)	8.6e-05	0.83 (0.02)	0.000144785	0.86 (0.02)	0.000167617	0.83 (0.05)	0.0002841	0.84 (0.06)	9.46602e-06	0.89 (0.02)	0.00024161	0.84 (0.02)	0.0003575	0.88 (0.03)	0.000671316
XRCC1	P681	0.00124569	0.94 (0.01)	9.36667e-05	0.94 (0.03)	5.16423e-05	0.92 (0.03)	0.000598279	0.95 (0.02)	1.8e-05	0.93 (0.02)	3.71725e-05	0.89 (0.05)	0.000626196	0.95 (0.01)	0.0004161	0.34 (0.15)	0.0112419	0.95 (0.02)	0.000420891	0.94 (0.01)	0.000203	0.94 (0.01)	0.00074303
XRCC2	P1077	0.00237102	0.95 (0.02)	0.000365333	0.98 (0)	0.0040495	0.97 (0)	0.00164292	0.97 (0.01)	-3e-05	0.95 (0.01)	0.000844827	0.97 (0.01)	0.00111386	0.95 (0.01)	0.000425333	0.74 (0.08)	0.0112995	0.95 (0.02)	0.000347807	0.97 (0)	0.000962	0.93 (0.03)	0.00181926
[truncated: 18 more rows]
