# Supplementary material for: Aging and Environmental Exposures Alter Tissue-Specific DNA Methylation Dependent upon CpG Island Context
Source: PLoS Genet. 2009 Aug 14;5(8):e1000602. doi: 10.1371/journal.pgen.1000602 (PMC2718614; doi:10.1371/journal.pgen.1000602)
Supplement: Table S2 — Autosomal CpG locus mean (sd) of average beta and values for the decrease in random forest classification accuracy with locus removal, for solid tissues, blood, and placenta. (0.29 MB XLS) [file pgen.1000602.s004.xls]

## Sheet: Supplemental Table 2
Table S2. Autosomal CpG locus mean (sd) of average beta and values for the decrease in random forest classification accuracy with locus removal for solid tissues, blood, and placenta.
			Solid tissues (n=113)		Blood (n=85)		Placenta (n=19)
GENE	CpG	Mean decrease in accuracy	Mean (sd)	Decrease in accuracy	Mean (sd)	Decrease in accuracy	Mean (sd)	Decrease in accuracy
AATK	E63	3.59779e-05	0.91 (0.1)	1.11908e-06	0.95 (0.01)	2.59192e-05	0.86 (0.05)	0.000299215
AATK	P519	6.60692e-05	0.83 (0.12)	6.05842e-06	0.91 (0.04)	7.28804e-05	0.68 (0.09)	0.000411368
AATK	P709	7.68185e-05	0.7 (0.16)	1.093e-05	0.84 (0.08)	6.13633e-05	0.36 (0.11)	0.000561196
ABCA1	E120	3.45385e-05	0.03 (0.01)	4.24332e-05	0.02 (0)	2.60845e-05	0.04 (0.02)	2.60408e-05
ABCA1	P45	1.95163e-05	0.04 (0.02)	2.97719e-05	0.03 (0.02)	7.30042e-06	0.1 (0.1)	1.51714e-05
ABCB4	E429	0.00255211	0.95 (0.01)	0.00183737	0.95 (0.01)	2.43947e-05	0.85 (0.05)	0.0184246
ABCB4	P51	0.00251109	0.95 (0.01)	0.00182235	0.94 (0.02)	3.46953e-05	0.78 (0.1)	0.0181177
ABCB4	P892	1.3106e-06	0.88 (0.11)	7.23928e-08	0.91 (0.09)	3.72323e-07	0.83 (0.19)	1.17955e-05
ABCC2	E16	8.32714e-05	0.84 (0.1)	1.12653e-05	0.85 (0.17)	2.85925e-07	0.55 (0.14)	0.000943599
ABCC2	P88	0.000488655	0.94 (0.04)	0.000232819	0.95 (0.02)	1.90752e-05	0.68 (0.09)	0.00415989
ABCC5	P444	2.56931e-05	0.04 (0.01)	4.39068e-05	0.03 (0.01)	7.59758e-06	0.04 (0.02)	1.03081e-06
ABCG2	P178	1.85727e-05	0.1 (0.03)	8.16393e-07	0.07 (0.02)	4.30027e-05	0.14 (0.04)	1.84079e-05
ABCG2	P310	1.18322e-05	0.04 (0.05)	2.03035e-05	0.02 (0.01)	3.06987e-06	0.02 (0.01)	-4.56782e-07
ABL1	P53	4.78857e-07	0.09 (0.04)	1.31785e-06	0.08 (0.04)	-4.11167e-07	0.1 (0.05)	-3.54906e-07
ABL2	P459	6.14998e-05	0.27 (0.11)	4.86324e-06	0.13 (0.04)	0.000151137	0.27 (0.09)	3.01652e-06
ABO	E110	5.46504e-05	0.12 (0.06)	1.69375e-05	0.06 (0.02)	0.000100579	0.28 (0.14)	5.94459e-05
ABO	P312	9.10365e-06	0.1 (0.04)	9.67626e-06	0.07 (0.03)	7.56228e-06	0.23 (0.16)	1.15501e-05
ACTG2	E98	1.64181e-05	0.86 (0.07)	2.7228e-06	0.92 (0.03)	3.15449e-05	0.87 (0.04)	3.0101e-05
ACTG2	P346	5.40623e-06	0.77 (0.08)	3.37324e-06	0.84 (0.06)	3.11326e-06	0.73 (0.06)	2.75481e-05
ACTG2	P455	5.85588e-06	0.94 (0.03)	7.24525e-06	0.95 (0.03)	4.82396e-06	0.96 (0.02)	2.78961e-06
ACVR1	E328	0.000518365	0.69 (0.15)	0.000568234	0.9 (0.04)	0.000447469	0.9 (0.03)	0.000556168
ACVR1	P983	0.000233549	0.85 (0.09)	5.09428e-05	0.94 (0.02)	0.000421371	0.82 (0.04)	0.000503716
ACVR1B	E497	8.18183e-06	0.04 (0.02)	8.46614e-06	0.03 (0.02)	2.35875e-06	0.11 (0.07)	3.05304e-05
ACVR1B	P572	1.17454e-07	0.18 (0.1)	2.76158e-07	0.22 (0.11)	9.7316e-07	0.25 (0.13)	-6.2254e-06
ACVR1C	P115	2.58791e-05	0.11 (0.05)	1.98885e-06	0.07 (0.04)	3.73861e-05	0.24 (0.07)	0.000115171
ACVR1C	P363	1.68379e-05	0.18 (0.08)	2.45968e-05	0.11 (0.05)	1.06841e-05	0.13 (0.07)	-5.88745e-07
ACVR2B	E27	2.76905e-06	0.04 (0.02)	3.5751e-06	0.03 (0.01)	1.80332e-06	0.05 (0.02)	2.59351e-06
ACVR2B	P676	1.98727e-07	0.11 (0.04)	-1.07521e-07	0.1 (0.05)	2.79751e-07	0.19 (0.09)	6.39755e-07
ADAMTS12	E52	3.58479e-06	0.33 (0.15)	5.21094e-07	0.27 (0.15)	8.06459e-06	0.48 (0.15)	1.29394e-06
ADAMTS12	P250	4.45792e-06	0.04 (0.02)	3.43511e-06	0.03 (0.01)	5.73573e-06	0.08 (0.04)	5.6438e-06
ADCYAP1	E163	9.28428e-06	0.05 (0.03)	1.05311e-05	0.05 (0.03)	6.91848e-06	0.14 (0.08)	1.31159e-05
ADCYAP1	P398	2.24591e-06	0.1 (0.08)	-1.30315e-07	0.06 (0.03)	6.58389e-06	0.13 (0.07)	-2.04683e-06
ADCYAP1	P455	1.89992e-05	0.08 (0.05)	2.97721e-06	0.05 (0.02)	4.57419e-05	0.12 (0.07)	-4.94531e-06
AFF3	P122	0.0122213	0.92 (0.04)	0.0098842	0.16 (0.08)	0.0164972	0.95 (0.02)	0.00822384
AFF3	P808	9.62255e-07	0.97 (0.01)	6.16674e-07	0.96 (0.01)	1.22011e-06	0.97 (0.01)	1.51364e-06
AFP	P824	4.83938e-06	0.92 (0.02)	1.75783e-06	0.92 (0.03)	5.46549e-07	0.89 (0.04)	4.12437e-05
AGTR1	P154	1.17043e-05	0.09 (0.06)	6.11872e-06	0.05 (0.02)	1.12049e-05	0.05 (0.01)	4.6327e-05
AGTR1	P41	1.79818e-06	0.05 (0.04)	1.94489e-06	0.03 (0.02)	7.52086e-07	0.04 (0.04)	6.23908e-06
AGXT	E115	0.00161018	0.95 (0.02)	0.00106322	0.95 (0.02)	2.23653e-05	0.74 (0.08)	0.0120543
AGXT	P180	0.00146876	0.91 (0.05)	0.000974315	0.87 (0.05)	4.03861e-05	0.42 (0.13)	0.0109556
AHR	E103	6.713e-05	0.03 (0.01)	9.90482e-05	0.02 (0.01)	3.72124e-05	0.04 (0.01)	1.1136e-05
AHR	P166	2.36354e-05	0.07 (0.06)	3.93297e-05	0.05 (0.04)	8.3751e-06	0.07 (0.05)	2.18254e-06
AIM2	E208	4.04842e-05	0.89 (0.04)	2.5812e-06	0.92 (0.02)	1.05573e-05	0.78 (0.08)	0.000402903
AIM2	P624	0.000103049	0.86 (0.07)	7.94553e-05	0.66 (0.15)	0.000142695	0.9 (0.04)	6.95524e-05
AKT1	P310	2.51335e-06	0.08 (0.02)	3.51298e-06	0.07 (0.02)	5.64154e-08	0.11 (0.05)	6.72244e-06
ALK	E183	4.16382e-05	0.11 (0.04)	1.37602e-05	0.07 (0.03)	5.2511e-05	0.31 (0.13)	0.000151479
ALK	P28	5.79826e-06	0.12 (0.06)	1.96637e-06	0.09 (0.06)	8.26535e-06	0.25 (0.09)	1.77763e-05
ALOX12	E85	6.23471e-05	0.59 (0.19)	8.174e-05	0.26 (0.22)	1.06107e-05	0.29 (0.11)	0.000194484
ALOX12	P223	2.99044e-05	0.6 (0.18)	2.83062e-05	0.31 (0.2)	4.53229e-06	0.31 (0.12)	0.000170688
ALPL	P278	0.000316973	0.03 (0.02)	0.000241573	0.02 (0)	0.000469832	0.03 (0.01)	0.000116069
ALPL	P433	5.02691e-07	0.29 (0.12)	4.45893e-07	0.28 (0.07)	7.37281e-07	0.3 (0.07)	2.14286e-08
AOC3	P890	4.15963e-05	0.54 (0.12)	3.26307e-06	0.67 (0.07)	3.79058e-05	0.27 (0.09)	0.000279225
APBA1	E99	1.33398e-06	0.07 (0.03)	2.00094e-06	0.11 (0.05)	3.1153e-07	0.06 (0.05)	1.33499e-06
APBA1	P644	3.53843e-06	0.05 (0.01)	3.31811e-06	0.04 (0.02)	3.64205e-08	0.07 (0.01)	2.26754e-05
APBA2	P227	5.63368e-06	0.93 (0.03)	1.54426e-06	0.91 (0.02)	1.04837e-05	0.94 (0.02)	8.21912e-06
APBA2	P305	9.05514e-06	0.89 (0.04)	2.28525e-06	0.89 (0.02)	1.96276e-05	0.91 (0.03)	1.21356e-06
APC	E117	0.00127902	0.28 (0.07)	0.000873664	0.2 (0.05)	6.82193e-05	0.9 (0.04)	0.00934418
APC	P14	0.000582946	0.22 (0.1)	0.000424696	0.14 (0.06)	3.16401e-05	0.83 (0.13)	0.00396566
APC	P280	0.00128825	0.05 (0.02)	0.000874525	0.02 (0.01)	0.000145545	0.48 (0.11)	0.00916702
APOA1	P261	0.000284612	0.78 (0.11)	0.00016973	0.93 (0.04)	0.000483099	0.89 (0.03)	0.000115177
APOA1	P75	1.06707e-06	0.84 (0.14)	1.82466e-06	0.9 (0.12)	2.02885e-07	0.91 (0.04)	-5.55556e-08
APOC1	P406	0.000111811	0.84 (0.03)	6.34534e-05	0.83 (0.03)	1.43712e-06	0.71 (0.08)	0.000872693
APOC2	P377	2.2747e-06	0.81 (0.07)	-6.22092e-07	0.83 (0.05)	5.09685e-07	0.77 (0.08)	2.88579e-05
APP	E8	1.42863e-06	0.04 (0.02)	7.34682e-07	0.03 (0.01)	2.32115e-06	0.05 (0.02)	1.22564e-06
APP	P179	1.73967e-06	0.09 (0.04)	9.98227e-07	0.07 (0.04)	2.68519e-06	0.14 (0.07)	2.52958e-06
AREG	E25	1.72857e-07	0.05 (0.05)	1.14448e-07	0.04 (0.01)	3.41189e-07	0.05 (0.01)	1.06176e-06
AREG	P217	9.50331e-07	0.16 (0.07)	-1.70636e-07	0.14 (0.05)	2.03502e-06	0.21 (0.11)	1.27778e-06
ARHGAP9	P260	1.24278e-05	0.9 (0.02)	2.27911e-06	0.91 (0.03)	1.30943e-06	0.86 (0.03)	0.000123091
ARHGAP9	P518	3.79634e-06	0.92 (0.02)	1.96387e-06	0.91 (0.02)	3.64084e-08	0.89 (0.02)	2.79749e-05
ARHGDIB	P148	5.93505e-05	0.54 (0.11)	3.78876e-05	0.35 (0.08)	9.98164e-05	0.47 (0.11)	7.89076e-06
ARNT	P238	3.0651e-06	0.03 (0.01)	5.67047e-06	0.05 (0.03)	6.03916e-07	0.06 (0.05)	-6.0101e-08
ASB4	E89	5.0353e-06	0.9 (0.04)	3.41063e-06	0.94 (0.02)	7.18749e-06	0.92 (0.03)	5.21905e-06
ASB4	P391	0.000366612	0.85 (0.06)	0.000225662	0.94 (0.02)	0.000582056	0.92 (0.02)	0.000247463
ASB4	P52	0.000139444	0.87 (0.06)	4.68538e-05	0.96 (0.02)	0.000289297	0.91 (0.08)	3.11575e-05
ASCL1	E24	2.67901e-05	0.05 (0.01)	4.65395e-05	0.03 (0.02)	7.97248e-06	0.08 (0.11)	-1.51436e-06
ASCL1	P747	5.1798e-05	0.44 (0.14)	2.1797e-05	0.4 (0.09)	2.19835e-05	0.78 (0.12)	0.00035041
ASCL2	E76	7.26655e-06	0.18 (0.11)	3.32337e-06	0.13 (0.05)	1.19633e-05	0.27 (0.11)	9.64444e-06
ASCL2	P360	1.24099e-05	0.17 (0.11)	9.29528e-06	0.1 (0.04)	2.01642e-05	0.21 (0.11)	-4.72162e-06
ASCL2	P609	0.000128246	0.38 (0.11)	0.000139455	0.16 (0.07)	0.0001389	0.29 (0.1)	5.24536e-06
ATP10A	P147	2.29283e-05	0.18 (0.11)	4.52767e-06	0.1 (0.04)	5.1986e-05	0.23 (0.1)	7.65368e-07
ATP10A	P524	-4.25379e-08	0.68 (0.11)	3.12687e-07	0.68 (0.08)	-5.61694e-08	0.7 (0.13)	-2e-06
AXL	E61	5.59876e-07	0.12 (0.05)	-4.11627e-07	0.14 (0.05)	1.66284e-06	0.1 (0.06)	2.29786e-06
AXL	P223	0.000401348	0.2 (0.1)	0.000199888	0.53 (0.14)	0.000625487	0.12 (0.07)	0.00062292
B3GALT5	E246	5.64016e-07	0.8 (0.07)	1.21443e-06	0.8 (0.04)	-4.23858e-07	0.84 (0.04)	1.5e-06
B3GALT5	P330	1.61377e-06	0.93 (0.02)	9.31811e-07	0.92 (0.03)	8.96971e-07	0.93 (0.03)	9.31515e-06
BAX	E281	3.40983e-05	0.69 (0.11)	-3.71595e-07	0.72 (0.05)	3.61849e-05	0.52 (0.1)	0.000237662
BCAM	E100	3.82687e-05	0.04 (0.01)	4.42934e-05	0.02 (0.01)	3.87607e-05	0.04 (0.02)	5.70087e-06
BCAM	P205	5.69897e-06	0.3 (0.12)	2.38753e-06	0.23 (0.1)	1.19279e-06	0.25 (0.08)	4.86547e-05
BCL2A1	P1127	0.00217532	0.97 (0.01)	0.00235137	0.95 (0.02)	5.48934e-05	0.85 (0.08)	0.010681
BCL2L2	E172	1.87695e-07	0.07 (0.03)	4.62927e-07	0.06 (0.04)	-1.62013e-07	0.07 (0.02)	5.2381e-08
BCL2L2	P280	7.33888e-07	0.17 (0.08)	-2.95963e-08	0.16 (0.08)	9.49527e-09	0.09 (0.06)	6.1083e-06
BCL3	E71	3.41737e-05	0.38 (0.12)	4.09007e-07	0.3 (0.09)	8.76486e-05	0.41 (0.11)	-1.03571e-06
BCL3	P1038	0.000198941	0.04 (0.01)	0.000290557	0.02 (0.01)	8.80959e-05	0.05 (0.02)	0.000159475
BCL6	P248	1.18523e-07	0.07 (0.03)	4.06793e-08	0.08 (0.04)	1.10571e-07	0.09 (0.06)	7.33333e-07
BCR	P346	0.000118984	0.55 (0.15)	0.000183205	0.83 (0.14)	4.88416e-05	0.78 (0.1)	5.19994e-05
			Solid tissues (n=113)		Blood (n=85)		Placenta (n=19)
GENE	CpG	Mean decrease in accuracy	Mean (sd)	Decrease in accuracy	Mean (sd)	Decrease in accuracy	Mean (sd)	Decrease in accuracy
BCR	P422	1.05246e-05	0.56 (0.13)	7.6887e-06	0.74 (0.11)	1.27169e-05	0.66 (0.1)	1.80946e-05
BDNF	E19	0.000293765	0.19 (0.07)	0.000345764	0.1 (0.03)	0.000231012	0.38 (0.17)	0.000281122
BDNF	P259	1.69613e-05	0.29 (0.1)	3.30628e-07	0.21 (0.06)	3.89142e-05	0.51 (0.17)	1.97193e-05
BIRC5	E89	0.000101383	0.04 (0.04)	0.000181828	0.03 (0.03)	1.75212e-05	0.04 (0.03)	2.97388e-06
BLK	P14	8.38574e-05	0.81 (0.08)	2.23404e-05	0.83 (0.09)	5.66683e-07	0.52 (0.16)	0.000850612
BLK	P668	4.08015e-05	0.95 (0.02)	5.54149e-05	0.95 (0.02)	7.80819e-06	0.86 (0.09)	9.86411e-05
BMP2	E48	0.000222891	0.05 (0.03)	0.000121686	0.04 (0.02)	1.27615e-05	0.51 (0.25)	0.00176385
BMP2	P1201	9.63174e-07	0.07 (0.04)	1.7727e-06	0.05 (0.04)	1.69802e-07	0.06 (0.03)	-2.30159e-07
BMP3	E147	1.05498e-06	0.15 (0.06)	2.37035e-07	0.13 (0.06)	9.83352e-07	0.24 (0.08)	6.38442e-06
BMP3	P56	1.11734e-06	0.04 (0.02)	1.00469e-06	0.03 (0.01)	1.36163e-07	0.06 (0.03)	5.78968e-06
BMP4	P123	7.47319e-05	0.22 (0.09)	1.91008e-05	0.1 (0.03)	0.000167298	0.15 (0.08)	-4.15168e-06
BMP4	P199	3.44041e-05	0.52 (0.14)	2.73681e-05	0.27 (0.12)	4.89197e-05	0.43 (0.09)	1.41835e-05
BMP6	P163	2.38708e-05	0.09 (0.05)	5.90888e-06	0.04 (0.02)	5.56565e-05	0.08 (0.04)	-4.76032e-06
BMP6	P398	6.35007e-05	0.04 (0.01)	5.71031e-06	0.03 (0.01)	0.000153218	0.05 (0.02)	6.56118e-06
BMPR1A	E88	5.88861e-05	0.78 (0.05)	4.85196e-05	0.72 (0.06)	5.11914e-06	0.59 (0.14)	0.000373571
BMPR1A	P956	8.95272e-07	0.04 (0.02)	1.67202e-06	0.04 (0.02)	-1.78063e-07	0.03 (0.01)	-2.53896e-07
BMPR2	E435	1.61087e-05	0.04 (0.03)	1.53663e-05	0.04 (0.02)	1.94253e-05	0.03 (0.02)	3.00418e-06
BMPR2	P1271	5.55472e-07	0.07 (0.03)	8.23234e-07	0.08 (0.05)	7.26529e-07	0.07 (0.06)	-1.60488e-06
BRCA1	P835	0.00247898	0.74 (0.09)	0.00174223	0.73 (0.1)	3.5471e-05	0.2 (0.09)	0.0181771
BSG	P211	8.1224e-05	0.08 (0.1)	0.000110773	0.04 (0.03)	5.91522e-05	0.09 (0.07)	3.48088e-06
C20orf47	P225	3.3621e-06	0.05 (0.01)	6.6572e-06	0.05 (0.01)	3.08024e-07	0.06 (0.03)	-1.27965e-06
C4B	E171	0.000844379	0.54 (0.08)	0.000391083	0.76 (0.05)	0.00155844	0.56 (0.09)	0.00047291
C4B	P191	0.000218461	0.92 (0.03)	0.000260533	0.96 (0.01)	0.000193901	0.96 (0.02)	7.85186e-05
CALCA	E174	6.82728e-06	0.31 (0.15)	1.764e-06	0.22 (0.1)	1.63469e-05	0.44 (0.21)	-4.21284e-06
CALCA	P171	7.35616e-05	0.38 (0.09)	7.31227e-05	0.48 (0.07)	6.32048e-06	0.67 (0.11)	0.000350843
CALCA	P75	1.45827e-05	0.11 (0.07)	1.80371e-06	0.09 (0.02)	3.0996e-05	0.18 (0.08)	1.85872e-05
CAPG	E228	0.00126893	0.41 (0.2)	0.000758077	0.06 (0.04)	0.00188747	0.67 (0.17)	0.00166724
CARD15	P302	8.32419e-06	0.38 (0.19)	5.00868e-06	0.4 (0.18)	2.01541e-06	0.74 (0.12)	5.88863e-05
CARD15	P665	0.00593964	0.78 (0.08)	0.00339534	0.35 (0.1)	0.00961342	0.9 (0.04)	0.00520271
CASP10	E139	0.000181445	0.17 (0.18)	0.000182749	0.05 (0.02)	0.000221249	0.07 (0.02)	1.45482e-05
CASP10	P186	3.71915e-05	0.16 (0.17)	3.33543e-05	0.06 (0.04)	4.98965e-05	0.13 (0.06)	5.84069e-06
CASP10	P334	1.57743e-05	0.28 (0.17)	2.17369e-05	0.15 (0.07)	1.04617e-05	0.18 (0.08)	4.46825e-06
CASP2	P192	4.01817e-06	0.08 (0.03)	7.00335e-06	0.07 (0.04)	1.17323e-06	0.13 (0.1)	-7.84127e-07
CASP3	P420	1.16369e-05	0.06 (0.02)	1.68762e-05	0.04 (0.02)	7.20718e-06	0.07 (0.03)	-1.33492e-06
CASP6	P201	4.10837e-07	0.08 (0.03)	3.77599e-07	0.07 (0.04)	-1.49931e-07	0.11 (0.03)	2.69683e-06
CASP6	P230	1.65424e-06	0.05 (0.03)	1.30677e-06	0.04 (0.02)	1.88487e-06	0.06 (0.02)	2.1746e-06
CASP8	E474	0.00111887	0.59 (0.11)	0.000803392	0.24 (0.12)	0.00175345	0.49 (0.08)	0.000252803
CAV1	P130	8.20661e-07	0.12 (0.05)	1.068e-06	0.13 (0.07)	1.70614e-07	0.17 (0.08)	2.13405e-06
CAV1	P169	1.82738e-06	0.21 (0.07)	1.55355e-06	0.27 (0.08)	3.13537e-06	0.22 (0.08)	-2.20714e-06
CAV2	E33	1.04549e-05	0.05 (0.06)	1.73004e-05	0.04 (0.02)	3.3778e-06	0.05 (0.02)	3.06753e-06
CCKAR	E79	7.94474e-05	0.71 (0.18)	1.10201e-05	0.86 (0.05)	0.000111507	0.54 (0.12)	0.000366082
CCKAR	P270	2.35965e-06	0.86 (0.06)	2.30286e-06	0.9 (0.03)	2.70434e-06	0.89 (0.03)	8.96681e-07
CCKBR	P361	6.8788e-05	0.04 (0.01)	2.03621e-05	0.02 (0.01)	0.000122425	0.05 (0.01)	0.00011713
CCKBR	P480	4.66181e-06	0.06 (0.06)	1.80614e-06	0.03 (0.01)	7.14608e-06	0.04 (0.01)	9.02951e-06
CCL3	E53	0.000180969	0.79 (0.09)	5.45448e-05	0.65 (0.07)	0.000343789	0.63 (0.09)	0.000238156
CCL3	P543	5.05586e-05	0.92 (0.05)	6.43907e-07	0.96 (0.01)	6.37275e-05	0.83 (0.05)	0.000295296
CCNA1	E7	1.56263e-05	0.12 (0.12)	1.40791e-05	0.03 (0.02)	2.01052e-05	0.07 (0.05)	5.23218e-06
CCNA1	P216	8.56585e-06	0.1 (0.08)	3.87342e-06	0.04 (0.03)	1.56277e-05	0.1 (0.06)	3.14646e-06
CCNC	P132	3.7516e-06	0.03 (0.02)	4.21643e-06	0.02 (0.01)	3.44433e-06	0.04 (0.01)	2.03485e-06
CCND1	E280	1.11041e-05	0.08 (0.03)	2.09749e-06	0.05 (0.02)	2.45282e-05	0.1 (0.05)	2.97698e-06
CCND1	P343	-1.08709e-07	0.09 (0.05)	2.61279e-07	0.08 (0.05)	-6.87044e-08	0.1 (0.08)	-2.0381e-06
CCND2	P887	2.51297e-06	0.04 (0.03)	1.84388e-06	0.03 (0.01)	2.32168e-06	0.06 (0.04)	7.31053e-06
CCND2	P898	3.91664e-06	0.05 (0.04)	4.27919e-06	0.03 (0.02)	2.88057e-06	0.07 (0.06)	7.0373e-06
CCND3	P435	5.05618e-06	0.06 (0.02)	7.417e-06	0.07 (0.03)	2.68418e-06	0.09 (0.03)	1.7127e-06
CCNE1	P683	2.49335e-05	0.11 (0.03)	4.186e-06	0.08 (0.02)	5.84605e-05	0.11 (0.03)	2.26746e-06
CCR5	P630	0.000180351	0.62 (0.08)	9.00506e-05	0.58 (0.06)	1.49248e-05	0.28 (0.12)	0.00143473
CD1A	P414	1.17364e-05	0.96 (0.01)	4.60844e-06	0.95 (0.02)	4.06404e-07	0.94 (0.02)	0.000112896
CD1A	P6	5.10138e-05	0.91 (0.04)	9.7649e-06	0.91 (0.02)	9.81194e-06	0.77 (0.08)	0.000506046
CD2	P68	0.00914299	0.84 (0.09)	0.00686098	0.15 (0.06)	0.0129939	0.92 (0.03)	0.00645256
CD34	E20	6.41587e-06	0.27 (0.09)	2.21477e-07	0.22 (0.07)	1.54225e-05	0.36 (0.1)	2.5785e-06
CD34	P339	0.00612205	0.71 (0.12)	0.00476198	0.3 (0.07)	0.00827797	0.83 (0.09)	0.00511049
CD34	P780	0.00312415	0.62 (0.13)	0.00280848	0.24 (0.06)	0.0036138	0.72 (0.09)	0.00320593
CD40	E58	2.62931e-05	0.1 (0.07)	1.94112e-05	0.05 (0.02)	3.91984e-05	0.12 (0.06)	7.45476e-06
CD40	P372	6.96643e-05	0.26 (0.15)	5.26841e-06	0.12 (0.04)	0.000150196	0.53 (0.14)	9.78515e-05
CD44	E26	0.000158749	0.04 (0.01)	0.000141062	0.03 (0.01)	2.75561e-05	0.27 (0.18)	0.000806897
CD44	P87	5.24735e-06	0.08 (0.04)	5.94076e-06	0.12 (0.06)	4.61703e-07	0.21 (0.12)	2.23018e-05
CD81	P211	3.38186e-05	0.18 (0.09)	2.81921e-05	0.09 (0.04)	4.84143e-05	0.19 (0.07)	3.79933e-06
CD81	P272	2.93156e-06	0.58 (0.17)	1.61155e-06	0.57 (0.11)	1.35196e-06	0.45 (0.14)	1.58595e-05
CD82	P557	3.21294e-05	0.16 (0.08)	3.26387e-05	0.37 (0.14)	3.14871e-05	0.13 (0.1)	2.79328e-05
CD86	P3	0.00962272	0.78 (0.1)	0.00811166	0.13 (0.06)	0.0121561	0.94 (0.03)	0.00811845
CD9	E14	2.20671e-06	0.06 (0.02)	2.10868e-06	0.04 (0.02)	1.56657e-06	0.1 (0.06)	5.92778e-06
CD9	P504	2.98507e-05	0.26 (0.13)	2.66587e-05	0.12 (0.09)	2.65133e-06	0.07 (0.04)	0.000177656
CD9	P585	1.43421e-05	0.56 (0.17)	4.10558e-06	0.35 (0.09)	2.45855e-05	0.38 (0.12)	3.2851e-05
CDC25B	E83	7.05531e-06	0.07 (0.05)	1.1534e-05	0.1 (0.08)	2.67799e-06	0.14 (0.11)	1.45794e-06
CDC25B	P11	3.34443e-05	0.04 (0.01)	5.61944e-05	0.03 (0.01)	1.12322e-05	0.04 (0.01)	-6.21429e-07
CDH1	P45	1.66013e-06	0.19 (0.08)	3.56363e-07	0.13 (0.06)	4.0481e-06	0.2 (0.12)	-8.12698e-07
CDH1	P52	1.20427e-05	0.11 (0.04)	9.21634e-07	0.06 (0.03)	2.8567e-05	0.12 (0.05)	8.07071e-07
CDH11	E102	7.23759e-05	0.06 (0.02)	6.86845e-05	0.04 (0.01)	3.10508e-05	0.25 (0.17)	0.0002567
CDH11	P203	2.0893e-05	0.05 (0.03)	9.19905e-06	0.03 (0.01)	2.3052e-05	0.33 (0.23)	7.55236e-05
CDH11	P354	1.67275e-05	0.27 (0.11)	7.90138e-06	0.22 (0.07)	8.82881e-06	0.57 (0.18)	9.71054e-05
CDH13	E102	6.76264e-05	0.09 (0.07)	3.26709e-05	0.06 (0.03)	1.13815e-05	0.53 (0.24)	0.000519113
CDH13	P88	0.00068808	0.35 (0.16)	0.000393878	0.2 (0.09)	6.77914e-05	0.89 (0.05)	0.0054777
CDH17	E31	2.24209e-05	0.91 (0.07)	2.96538e-06	0.95 (0.02)	2.22499e-05	0.88 (0.03)	0.000139973
CDH17	P376	-3.85536e-07	0.92 (0.04)	-7.87067e-08	0.93 (0.02)	2.72428e-08	0.93 (0.02)	-4.08261e-06
CDH17	P532	5.148e-07	0.96 (0.02)	6.75683e-07	0.95 (0.02)	4.93881e-08	0.95 (0.02)	2.82727e-06
CDH3	E100	1.89867e-06	0.18 (0.09)	2.03638e-06	0.23 (0.13)	4.18889e-07	0.27 (0.1)	6.2873e-06
CDH3	P87	1.00596e-05	0.06 (0.04)	1.18105e-05	0.07 (0.05)	2.43339e-06	0.04 (0.01)	3.67699e-05
CDK10	E74	7.45467e-06	0.07 (0.03)	1.92044e-06	0.05 (0.03)	1.60313e-05	0.09 (0.04)	8.27778e-07
CDK10	P199	1.53668e-05	0.31 (0.09)	6.74527e-07	0.4 (0.09)	8.22516e-06	0.18 (0.07)	0.000134033
CDK2	P330	3.18906e-06	0.08 (0.07)	4.96752e-06	0.08 (0.05)	1.79234e-06	0.07 (0.04)	-7.53896e-07
CDK6	E256	8.45397e-07	0.13 (0.03)	7.391e-08	0.13 (0.03)	2.1079e-06	0.18 (0.08)	-7.37229e-07
CDK6	P291	5.16824e-05	0.05 (0.03)	8.27888e-05	0.07 (0.05)	2.17408e-05	0.07 (0.04)	4.06212e-06
CDKN1A	E101	2.55771e-06	0.06 (0.02)	8.20397e-07	0.04 (0.02)	4.88974e-06	0.07 (0.03)	1.75159e-06
CDKN1A	P242	1.45444e-05	0.05 (0.07)	2.40189e-05	0.03 (0.02)	3.50734e-06	0.07 (0.07)	4.9381e-06
CDKN1B	P1161	0.000172714	0.06 (0.03)	5.72989e-05	0.03 (0.01)	9.90453e-05	0.3 (0.11)	0.00122092
CDKN1C	P6	1.12918e-05	0.15 (0.05)	1.34305e-06	0.1 (0.03)	2.60716e-05	0.2 (0.11)	2.99365e-06
CDKN1C	P626	2.31261e-05	0.1 (0.08)	1.03572e-05	0.07 (0.03)	1.43504e-05	0.38 (0.2)	0.000130204
CDKN2A	E121	1.82821e-06	0.07 (0.02)	9.68263e-07	0.05 (0.02)	2.51291e-06	0.1 (0.05)	2.17944e-06
CDKN2B	E220	4.2939e-07	0.06 (0.02)	2.749e-07	0.06 (0.02)	-5.35458e-07	0.08 (0.01)	6.36833e-06
CDKN2B	S294	4.95488e-06	0.09 (0.08)	2.70531e-06	0.05 (0.04)	6.85577e-06	0.04 (0.03)	9.49084e-06
			Solid tissues (n=113)		Blood (n=85)		Placenta (n=19)
GENE	CpG	Mean decrease in accuracy	Mean (sd)	Decrease in accuracy	Mean (sd)	Decrease in accuracy	Mean (sd)	Decrease in accuracy
CEACAM1	E57	0.00213378	0.17 (0.17)	0.00234251	0.02 (0.01)	0.00230621	0.04 (0.02)	0.000261635
CEACAM1	P44	0.00186933	0.51 (0.18)	0.00124644	0.11 (0.04)	0.00283874	0.35 (0.1)	0.00140319
CEBPA	P1163	1.20902e-05	0.08 (0.03)	9.46554e-06	0.07 (0.03)	1.07719e-06	0.17 (0.07)	6.78429e-05
CEBPA	P706	2.43008e-06	0.09 (0.06)	3.67986e-06	0.08 (0.04)	6.89691e-07	0.1 (0.07)	3.28651e-06
CFTR	P115	1.45872e-06	0.06 (0.03)	1.17989e-06	0.04 (0.02)	1.88064e-06	0.09 (0.07)	8.80952e-07
CFTR	P372	4.30369e-06	0.35 (0.11)	5.04366e-07	0.26 (0.09)	8.64115e-06	0.46 (0.13)	5.58653e-06
CHD2	P451	8.06482e-05	0.95 (0.01)	0.000140324	0.92 (0.03)	1.74e-05	0.93 (0.02)	1.48291e-05
CHD2	P667	4.4388e-07	0.9 (0.03)	1.17371e-06	0.91 (0.03)	-5.74543e-07	0.9 (0.03)	2.61833e-07
CHFR	P501	-4.22119e-07	0.17 (0.1)	-2.35646e-06	0.14 (0.09)	2.04218e-06	0.19 (0.11)	5.07215e-08
CHFR	P635	0.000238099	0.05 (0.02)	0.000148487	0.03 (0)	0.000352792	0.06 (0.01)	0.000263918
CHGA	E52	1.3038e-05	0.15 (0.11)	6.09515e-06	0.09 (0.03)	2.40332e-05	0.13 (0.06)	7.36436e-06
CHGA	P243	1.71462e-06	0.33 (0.12)	3.35097e-07	0.36 (0.11)	-2.07665e-07	0.22 (0.12)	1.93353e-05
CHI3L2	E10	1.03833e-05	0.74 (0.1)	2.45535e-06	0.79 (0.05)	2.29509e-05	0.81 (0.05)	4.14113e-06
CHI3L2	P226	5.12297e-05	0.78 (0.1)	2.75245e-06	0.74 (0.05)	8.45539e-05	0.93 (0.02)	0.000202225
CLDN4	P1120	0.000254858	0.78 (0.09)	6.71502e-05	0.87 (0.03)	0.000194983	0.48 (0.11)	0.00164032
CLK1	P538	0.000117641	0.2 (0.06)	0.000120022	0.39 (0.11)	9.55786e-05	0.14 (0.06)	0.000209254
COL18A1	P365	4.1637e-07	0.08 (0.04)	-6.25425e-07	0.06 (0.03)	1.97267e-06	0.07 (0.04)	-3.31674e-07
COL18A1	P494	5.96441e-05	0.3 (0.13)	4.70333e-06	0.15 (0.07)	0.000144463	0.36 (0.12)	5.27496e-06
COL1A1	P117	-9.00205e-08	0.29 (0.09)	-2.51936e-07	0.23 (0.08)	-3.52109e-07	0.29 (0.08)	1.60794e-06
COL1A1	P5	2.43335e-08	0.32 (0.13)	2.5966e-07	0.25 (0.12)	7.90816e-07	0.27 (0.14)	-5.20411e-06
COL1A2	E299	0.00126987	0.09 (0.06)	0.000856724	0.05 (0.01)	0.0001166	0.81 (0.08)	0.00926006
COL1A2	P407	0.00019863	0.46 (0.11)	0.000176316	0.42 (0.14)	1.93894e-06	0.76 (0.07)	0.00116168
COL1A2	P48	0.0012943	0.08 (0.06)	0.000865459	0.03 (0.02)	0.000112093	0.72 (0.09)	0.00950136
COL4A3	E205	1.27918e-05	0.03 (0.01)	1.77519e-06	0.02 (0.01)	3.05371e-05	0.03 (0.01)	4.02381e-07
COL4A3	P545	4.7093e-06	0.05 (0.01)	4.10138e-06	0.04 (0.02)	3.09299e-06	0.11 (0.07)	1.6223e-05
COL6A1	P283	3.21432e-05	0.02 (0.01)	4.90027e-05	0.01 (0)	1.40657e-05	0.02 (0.01)	1.2662e-05
COL6A1	P425	6.13563e-06	0.21 (0.08)	7.23716e-07	0.16 (0.07)	1.25841e-05	0.27 (0.06)	9.66696e-06
COMT	E401	0.00126862	0.26 (0.11)	0.000887787	0.17 (0.1)	6.68067e-05	0.8 (0.07)	0.00923203
COPG2	P298	1.52006e-05	0.05 (0.04)	8.32229e-06	0.05 (0.04)	2.09993e-05	0.03 (0.01)	3.40186e-05
CPA4	E20	0.00423759	0.52 (0.13)	0.00368057	0.8 (0.04)	0.0049419	0.23 (0.09)	0.00471478
CPA4	P1265	2.0802e-06	0.94 (0.01)	3.03175e-06	0.94 (0.02)	1.73553e-06	0.94 (0.02)	-2.1e-06
CPA4	P961	1.50116e-05	0.84 (0.06)	6.44574e-06	0.82 (0.08)	1.94943e-06	0.78 (0.04)	0.000126859
CPNE1	P138	1.32543e-06	0.09 (0.04)	1.14344e-06	0.08 (0.05)	2.20284e-06	0.15 (0.07)	-1.1032e-06
CREB1	P819	2.52489e-05	0.16 (0.09)	4.31685e-05	0.08 (0.06)	6.65862e-06	0.08 (0.06)	4.3342e-06
CREBBP	P712	4.70405e-07	0.85 (0.07)	-5.64306e-08	0.81 (0.08)	1.30803e-06	0.87 (0.05)	-9.04762e-08
CRIP1	P274	3.22746e-05	0.58 (0.1)	1.11825e-05	0.42 (0.1)	6.70331e-05	0.52 (0.13)	1.79774e-06
CRIP1	P874	4.7898e-05	0.2 (0.11)	2.82139e-05	0.15 (0.05)	5.40194e-06	0.06 (0.04)	0.000337047
CRK	P721	0.000269886	0.37 (0.14)	0.000122533	0.47 (0.12)	1.89814e-05	0.1 (0.06)	0.00232371
CSF1	P217	1.70498e-06	0.08 (0.04)	3.60404e-06	0.11 (0.05)	1.43869e-07	0.08 (0.06)	-2.0381e-06
CSF1	P339	2.93123e-06	0.05 (0.06)	4.22277e-06	0.03 (0.01)	1.454e-06	0.06 (0.06)	1.65079e-06
CSF1R	E26	0.00061914	0.93 (0.04)	0.000567271	0.8 (0.07)	0.000550567	0.79 (0.07)	0.00125516
CSF1R	P73	0.000314104	0.56 (0.11)	9.84674e-05	0.73 (0.05)	0.000507362	0.38 (0.09)	0.000762531
CSF2	E248	1.64305e-06	0.91 (0.04)	1.1081e-06	0.93 (0.02)	2.90587e-06	0.94 (0.03)	-1.3969e-06
CSF2	P605	1.0622e-05	0.86 (0.05)	1.19001e-05	0.9 (0.02)	4.79827e-06	0.92 (0.03)	2.54955e-05
CSF3	E242	0.000101721	0.86 (0.06)	1.13725e-05	0.77 (0.05)	0.000229794	0.93 (0.04)	8.70785e-05
CSF3	P309	7.81408e-06	0.5 (0.15)	2.01714e-06	0.58 (0.1)	2.96207e-06	0.76 (0.06)	6.71042e-05
CSF3R	P472	0.000466584	0.77 (0.1)	0.000220645	0.46 (0.12)	0.000774236	0.57 (0.1)	0.000584712
CSF3R	P8	0.00043769	0.49 (0.18)	0.000477109	0.22 (0.08)	0.000227039	0.16 (0.06)	0.00117018
CSK	P740	7.47505e-07	0.18 (0.08)	7.5354e-07	0.15 (0.08)	2.17583e-07	0.26 (0.14)	3.42143e-06
CSPG2	E38	3.4298e-07	0.19 (0.1)	2.34807e-07	0.18 (0.11)	-2.04482e-07	0.16 (0.08)	2.45498e-06
CSPG2	P82	1.20409e-07	0.17 (0.06)	8.82877e-07	0.14 (0.05)	-2.20913e-07	0.18 (0.11)	-1.61472e-06
CSTB	E410	1.61564e-05	0.06 (0.03)	2.18988e-05	0.06 (0.04)	9.31443e-06	0.13 (0.07)	1.22044e-05
CTGF	E156	6.20875e-06	0.06 (0.03)	4.90588e-06	0.04 (0.02)	7.44348e-06	0.18 (0.17)	8.87583e-06
CTGF	P693	0.00143045	0.88 (0.06)	0.00056528	0.96 (0.01)	0.00239061	0.67 (0.1)	0.00246408
CTLA4	E176	1.25e-05	0.89 (0.03)	1.94886e-06	0.88 (0.02)	2.37329e-05	0.91 (0.01)	2.79952e-05
CTLA4	P1128	4.98681e-06	0.89 (0.03)	1.26296e-06	0.89 (0.02)	1.98863e-06	0.81 (0.09)	3.59351e-05
CTNNA1	P185	7.27404e-06	0.03 (0.01)	1.06444e-05	0.02 (0.01)	3.85496e-06	0.05 (0.03)	5.16436e-06
CTNNA1	P382	6.31405e-06	0.07 (0.03)	2.35786e-06	0.05 (0.02)	1.16917e-05	0.11 (0.05)	5.16082e-06
CTNNB1	P757	7.59051e-06	0.09 (0.04)	2.71304e-06	0.06 (0.02)	1.55704e-05	0.11 (0.05)	-5.82418e-07
CTSD	P726	4.77685e-06	0.63 (0.1)	5.32428e-06	0.78 (0.1)	4.50831e-06	0.65 (0.15)	1.83975e-06
CTSH	E157	3.22757e-05	0.07 (0.04)	5.79845e-05	0.07 (0.04)	5.25053e-06	0.06 (0.03)	2.38745e-06
CTSH	P238	3.39127e-06	0.07 (0.03)	4.93484e-06	0.05 (0.02)	1.95724e-06	0.07 (0.04)	1.18853e-07
CTSL	P264	5.10244e-05	0.33 (0.13)	5.74912e-06	0.44 (0.08)	6.30272e-05	0.1 (0.07)	0.000265338
CTSL	P81	1.14155e-06	0.05 (0.03)	7.76913e-07	0.04 (0.01)	1.50791e-06	0.05 (0.01)	1.16032e-06
CTTN	E29	2.53762e-05	0.09 (0.03)	4.39619e-05	0.07 (0.05)	4.3402e-06	0.15 (0.11)	1.29986e-05
CXCL9	E268	4.14176e-05	0.84 (0.08)	4.08146e-06	0.91 (0.03)	4.90539e-05	0.74 (0.1)	0.000245182
CYP1A1	P382	1.10045e-05	0.05 (0.02)	1.95062e-05	0.05 (0.02)	2.45582e-06	0.08 (0.06)	1.20563e-07
CYP1B1	E83	6.45618e-06	0.21 (0.13)	1.82653e-06	0.13 (0.09)	1.31499e-05	0.31 (0.15)	4.46025e-06
CYP1B1	P212	2.9394e-05	0.32 (0.12)	1.11141e-06	0.22 (0.08)	7.38263e-05	0.34 (0.1)	3.32937e-06
CYP2E1	E53	0.000674301	0.87 (0.05)	0.000335881	0.88 (0.04)	2.29433e-05	0.52 (0.16)	0.00577044
CYP2E1	P416	3.23067e-05	0.91 (0.09)	1.16962e-06	0.95 (0.02)	1.27671e-05	0.81 (0.11)	0.000329134
DAB2	P35	8.10272e-06	0.04 (0.02)	7.2305e-06	0.03 (0.01)	9.72612e-06	0.04 (0.01)	7.73651e-06
DAB2	P468	8.1366e-06	0.04 (0.02)	1.38164e-05	0.03 (0.01)	2.45148e-06	0.04 (0.02)	3.96825e-07
DAB2IP	E18	0.000905356	0.14 (0.06)	0.000562473	0.11 (0.05)	7.29896e-05	0.6 (0.11)	0.00685763
DAB2IP	P9	0.000615057	0.04 (0.02)	0.000420513	0.04 (0.02)	1.49551e-05	0.51 (0.18)	0.00446382
DAPK1	E46	4.22724e-07	0.22 (0.07)	-2.05877e-06	0.19 (0.05)	3.42763e-06	0.18 (0.09)	1.12706e-06
DAPK1	P10	2.34781e-06	0.09 (0.04)	1.78851e-07	0.06 (0.03)	5.33228e-06	0.12 (0.05)	6.4228e-07
DAPK1	P345	4.26694e-07	0.06 (0.03)	8.59602e-07	0.04 (0.03)	5.86679e-07	0.06 (0.04)	-2.21905e-06
DBC1	E204	9.8613e-06	0.23 (0.11)	5.62303e-07	0.16 (0.07)	1.20768e-05	0.51 (0.18)	5.16537e-05
DBC1	P351	8.64704e-06	0.09 (0.08)	1.29136e-05	0.05 (0.04)	6.10164e-06	0.11 (0.1)	-4.91587e-06
DCC	E53	0.000276745	0.37 (0.12)	0.000150839	0.34 (0.09)	5.36012e-05	0.84 (0.1)	0.0020175
DCC	P177	3.63493e-05	0.11 (0.07)	1.83001e-05	0.06 (0.05)	2.73133e-05	0.43 (0.21)	0.000161139
DCC	P471	3.73912e-05	0.12 (0.07)	1.66942e-05	0.09 (0.03)	6.10062e-05	0.44 (0.26)	5.34678e-05
DCN	P1320	8.09582e-08	0.94 (0.03)	8.55076e-08	0.95 (0.01)	-2.78137e-07	0.96 (0.02)	1.10808e-06
DDB2	P407	-1.12598e-07	0.17 (0.05)	-6.63157e-08	0.18 (0.07)	-4.94888e-07	0.15 (0.05)	9.39755e-07
DDB2	P613	1.47988e-06	0.19 (0.09)	-6.37529e-07	0.25 (0.12)	-1.66993e-07	0.13 (0.06)	2.32229e-05
DDIT3	P1313	0.000483824	0.36 (0.16)	0.000128215	0.66 (0.07)	0.000983921	0.35 (0.13)	0.000426528
DDR1	E23	1.58453e-06	0.11 (0.04)	-1.38663e-07	0.09 (0.03)	4.10934e-06	0.13 (0.05)	7.77056e-08
DDR1	P332	3.18116e-05	0.61 (0.18)	-8.90753e-07	0.72 (0.15)	1.16121e-05	0.25 (0.1)	0.000324652
DDR2	E331	4.01221e-05	0.89 (0.1)	3.85407e-05	0.95 (0.01)	4.47901e-05	0.93 (0.02)	3.59056e-05
DDR2	P743	0.00148077	0.8 (0.09)	0.000960551	0.93 (0.02)	0.00204171	0.72 (0.08)	0.00218081
DES	E228	1.08645e-05	0.11 (0.06)	1.59167e-06	0.08 (0.03)	1.84373e-05	0.22 (0.09)	3.18276e-05
DES	P1006	4.50423e-06	0.82 (0.09)	1.92957e-06	0.87 (0.03)	8.342e-06	0.84 (0.03)	3.14199e-06
DHCR24	P406	6.74804e-06	0.05 (0.03)	8.23026e-06	0.04 (0.03)	3.74085e-06	0.1 (0.06)	1.0731e-05
DHCR24	P652	1.29935e-06	0.62 (0.09)	-1.79882e-08	0.61 (0.05)	3.15045e-06	0.57 (0.07)	1.07374e-06
DIO3	E230	6.41026e-06	0.68 (0.13)	1.84493e-06	0.69 (0.08)	1.03215e-05	0.82 (0.08)	1.64596e-05
DIO3	P674	1.21291e-05	0.1 (0.06)	4.64627e-06	0.04 (0.03)	7.19277e-06	0.04 (0.01)	7.82464e-05
DIO3	P90	2.48639e-06	0.37 (0.15)	1.38672e-06	0.31 (0.15)	1.68832e-06	0.5 (0.09)	1.26445e-05
DIRAS3	E55	1.07205e-06	0.9 (0.02)	9.67762e-07	0.88 (0.02)	2.0344e-06	0.89 (0.03)	-1.72388e-06
DIRAS3	P745	1.34549e-05	0.81 (0.06)	3.7787e-06	0.78 (0.07)	1.67757e-05	0.88 (0.07)	5.10129e-05
			Solid tissues (n=113)		Blood (n=85)		Placenta (n=19)
GENE	CpG	Mean decrease in accuracy	Mean (sd)	Decrease in accuracy	Mean (sd)	Decrease in accuracy	Mean (sd)	Decrease in accuracy
DKFZP564O0823	E45	6.18328e-06	0.06 (0.02)	9.79701e-06	0.04 (0.02)	2.7992e-06	0.07 (0.03)	-9.81674e-07
DLC1	E276	0.00027241	0.67 (0.14)	0.000164528	0.32 (0.1)	0.00046938	0.48 (0.1)	5.74049e-05
DLC1	P695	0.000543747	0.81 (0.1)	0.000321918	0.76 (0.08)	2.22522e-05	0.3 (0.12)	0.00416175
DLC1	P88	0.000118309	0.64 (0.11)	0.000158673	0.43 (0.11)	8.95643e-05	0.56 (0.16)	2.35475e-05
DLK1	E227	3.11126e-05	0.13 (0.11)	3.80057e-06	0.06 (0.03)	6.01768e-05	0.41 (0.19)	6.11057e-05
DLL1	P386	1.40814e-05	0.04 (0.02)	2.49646e-05	0.05 (0.04)	-5.98675e-08	0.11 (0.19)	1.2959e-05
DLL1	P832	-8.65735e-07	0.25 (0.11)	-6.82611e-07	0.22 (0.09)	4.39423e-08	0.25 (0.2)	-5.63965e-06
DMP1	E194	-1.85779e-07	0.92 (0.03)	-4.41381e-07	0.92 (0.02)	2.83814e-07	0.9 (0.07)	1.66667e-07
DMP1	P134	2.45277e-05	0.88 (0.03)	1.10273e-05	0.89 (0.03)	-5.72586e-08	0.8 (0.06)	0.000225639
DNAJC15	E26	4.69383e-06	0.1 (0.07)	1.11829e-06	0.1 (0.04)	3.17322e-07	0.06 (0.02)	4.71994e-05
DNAJC15	P65	3.85028e-06	0.87 (0.13)	1.8038e-07	0.92 (0.02)	2.56565e-06	0.88 (0.04)	2.99349e-05
DNMT1	P100	0.00128069	0.09 (0.04)	0.000885102	0.08 (0.04)	2.65557e-05	0.83 (0.06)	0.00956218
DNMT2	P199	0.000470859	0.82 (0.06)	0.000639266	0.9 (0.02)	6.92668e-05	0.91 (0.03)	0.00127714
DNMT3B	P352	6.16946e-05	0.16 (0.06)	7.01987e-05	0.38 (0.15)	3.83636e-05	0.11 (0.05)	0.000114069
DSC2	E90	3.47435e-06	0.3 (0.13)	7.00422e-07	0.24 (0.08)	4.10362e-06	0.18 (0.08)	1.68017e-05
DSC2	P407	2.44222e-05	0.92 (0.04)	-9.40995e-08	0.93 (0.02)	4.53278e-06	0.85 (0.04)	0.00027325
DSG1	E292	2.76567e-06	0.9 (0.03)	-9.44298e-07	0.88 (0.02)	7.39944e-06	0.92 (0.04)	4.53333e-06
DSG1	P159	2.57409e-06	0.87 (0.08)	6.84849e-07	0.89 (0.02)	2.05565e-06	0.84 (0.08)	1.50968e-05
DSP	P36	5.67939e-06	0.24 (0.11)	-8.12093e-08	0.17 (0.1)	1.4771e-05	0.31 (0.1)	1.47237e-06
DSP	P440	4.10774e-06	0.04 (0.01)	7.2019e-06	0.03 (0.02)	1.01864e-06	0.04 (0.02)	-1.54365e-06
DST	E31	1.10289e-05	0.06 (0.02)	1.06068e-06	0.05 (0.01)	2.33885e-05	0.04 (0.02)	1.13374e-05
DST	P262	3.07618e-06	0.06 (0.02)	1.67727e-06	0.05 (0.03)	3.54356e-06	0.09 (0.04)	8.56825e-06
DUSP4	E61	1.9217e-07	0.13 (0.05)	4.3252e-07	0.12 (0.04)	3.44422e-07	0.16 (0.05)	-2.59921e-06
DUSP4	P925	8.90049e-06	0.04 (0.01)	3.51799e-07	0.02 (0.01)	1.91279e-05	0.05 (0.02)	1.5504e-05
E2F3	P840	1.18937e-05	0.06 (0.02)	2.16837e-05	0.06 (0.03)	1.84885e-06	0.07 (0.03)	-2.19841e-07
E2F5	P516	2.07554e-05	0.55 (0.14)	1.85098e-06	0.7 (0.08)	1.85124e-05	0.28 (0.15)	0.000142512
EDN1	E50	4.16107e-05	0.05 (0.04)	7.58758e-05	0.06 (0.06)	4.7597e-06	0.04 (0.04)	6.42501e-06
EDN1	P39	2.02572e-06	0.03 (0.01)	1.43439e-06	0.02 (0.01)	1.69133e-06	0.04 (0.01)	7.17958e-06
EDNRB	P148	0.00234537	0.96 (0.01)	0.00161144	0.96 (0.01)	3.00904e-05	0.79 (0.09)	0.0174018
EDNRB	P709	0.00249378	0.96 (0.01)	0.00174127	0.96 (0.01)	3.33265e-05	0.67 (0.13)	0.0182831
EFNA1	P591	5.94259e-05	0.04 (0.02)	0.00010779	0.03 (0.01)	1.04001e-05	0.04 (0.01)	-4.80087e-07
EFNA1	P7	7.60323e-07	0.03 (0.01)	1.45815e-06	0.03 (0.01)	-2.65076e-07	0.03 (0.01)	1.90238e-06
EFNB3	E17	7.02914e-07	0.56 (0.06)	-1.06716e-07	0.56 (0.05)	7.47472e-07	0.64 (0.06)	4.41429e-06
EFNB3	P442	0.000246415	0.17 (0.04)	0.000385575	0.09 (0.03)	0.000111496	0.19 (0.07)	4.85959e-05
EGF	E339	2.17137e-05	0.91 (0.06)	9.24158e-06	0.95 (0.02)	1.5596e-05	0.89 (0.03)	0.000132337
EGF	P242	2.07444e-06	0.89 (0.04)	2.7774e-08	0.9 (0.02)	3.25838e-06	0.91 (0.06)	8.21429e-06
EGF	P413	-2.04981e-07	0.88 (0.04)	3.09914e-07	0.9 (0.03)	-9.26296e-08	0.89 (0.05)	-3.53968e-06
EGFR	E295	1.6176e-06	0.04 (0.02)	1.82968e-06	0.03 (0.01)	1.19238e-06	0.04 (0.02)	2.58889e-06
EGFR	P260	1.64009e-07	0.08 (0.03)	-9.53221e-10	0.06 (0.03)	3.21145e-07	0.08 (0.04)	-2.95238e-07
EGR4	E70	2.77387e-05	0.38 (0.11)	7.11213e-06	0.3 (0.09)	3.3895e-05	0.6 (0.1)	0.000118375
EGR4	P479	2.13686e-05	0.1 (0.04)	7.38706e-06	0.06 (0.03)	1.66123e-05	0.34 (0.16)	0.000124464
EIF2AK2	E103	4.30094e-06	0.09 (0.04)	3.72276e-06	0.07 (0.04)	6.73198e-06	0.11 (0.05)	-2.17619e-06
EIF2AK2	P313	5.59215e-06	0.06 (0.03)	1.01266e-05	0.07 (0.05)	4.4497e-07	0.1 (0.1)	2.39916e-06
ELK3	P514	3.55782e-06	0.21 (0.09)	7.97194e-06	0.13 (0.09)	-2.19006e-07	0.14 (0.1)	-4.8746e-06
ELL	P693	4.54597e-05	0.43 (0.12)	1.62382e-05	0.5 (0.11)	1.84588e-06	0.16 (0.09)	0.000424971
EMR3	E61	0.00271041	0.65 (0.15)	0.00178232	0.15 (0.06)	0.00454098	0.51 (0.17)	0.000283043
EMR3	P1297	0.00142055	0.91 (0.05)	0.00113944	0.86 (0.05)	1.83419e-05	0.61 (0.13)	0.00966581
EMR3	P39	0.00551659	0.8 (0.1)	0.00554162	0.23 (0.09)	0.00604374	0.65 (0.13)	0.00349908
ENC1	P484	5.61581e-06	0.07 (0.02)	1.12697e-06	0.05 (0.02)	1.14004e-05	0.09 (0.02)	6.4373e-06
EPHA1	E46	0.000105482	0.07 (0.06)	0.000175893	0.03 (0.04)	3.50745e-05	0.07 (0.04)	9.48487e-06
EPHA1	P119	0.000257923	0.05 (0.02)	0.000302524	0.02 (0.01)	0.000198512	0.07 (0.03)	0.000287665
EPHA2	P203	4.38253e-05	0.45 (0.12)	3.57432e-06	0.49 (0.13)	6.03807e-06	0.17 (0.08)	0.000465049
EPHA2	P340	7.94467e-05	0.27 (0.09)	2.18625e-05	0.32 (0.09)	4.4362e-05	0.07 (0.04)	0.000584089
EPHA3	E156	4.91543e-07	0.1 (0.05)	4.21989e-07	0.08 (0.03)	1.08836e-06	0.12 (0.08)	-2.80277e-06
EPHA3	P106	3.73809e-06	0.14 (0.12)	1.98134e-06	0.06 (0.05)	8.16095e-06	0.2 (0.19)	-4.84545e-06
EPHA5	E158	9.94912e-05	0.06 (0.04)	1.23251e-05	0.03 (0.01)	0.000173789	0.21 (0.11)	0.000284687
EPHA5	P66	0.000656518	0.48 (0.13)	0.000369536	0.42 (0.09)	2.50457e-05	0.88 (0.05)	0.00543543
EPHA7	E6	4.02482e-05	0.07 (0.03)	6.34669e-06	0.04 (0.02)	6.60258e-05	0.2 (0.11)	0.000130472
EPHA7	P205	5.67184e-05	0.08 (0.03)	1.66492e-05	0.05 (0.02)	5.54525e-05	0.22 (0.09)	0.000289221
EPHA8	P256	1.92941e-05	0.18 (0.07)	2.79452e-06	0.12 (0.04)	4.31216e-05	0.26 (0.09)	1.06232e-05
EPHA8	P456	1.97444e-06	0.81 (0.08)	6.65593e-07	0.82 (0.06)	-2.25265e-07	0.75 (0.07)	2.05334e-05
EPHB1	E202	5.7716e-06	0.79 (0.1)	-3.50689e-07	0.77 (0.09)	1.50914e-05	0.83 (0.08)	1.1381e-06
EPHB1	P503	-4.08405e-08	0.13 (0.06)	5.18508e-08	0.11 (0.05)	1.61837e-07	0.12 (0.05)	-7.16811e-07
EPHB2	E297	1.2854e-05	0.04 (0.01)	1.26788e-05	0.02 (0.01)	1.472e-05	0.07 (0.03)	5.08427e-06
EPHB2	P165	2.52426e-06	0.11 (0.06)	3.12179e-06	0.08 (0.06)	9.59514e-07	0.14 (0.11)	5.47937e-06
EPHB3	E0	6.06142e-07	0.11 (0.06)	1.53239e-06	0.08 (0.06)	1.36163e-08	0.11 (0.06)	-2.16039e-06
EPHB3	P569	3.45539e-06	0.11 (0.04)	1.43954e-06	0.1 (0.04)	5.18727e-07	0.19 (0.06)	2.55201e-05
EPHB4	E476	2.11984e-06	0.41 (0.17)	-1.51879e-07	0.36 (0.15)	4.80559e-06	0.56 (0.15)	2.56667e-06
EPHB4	P313	7.77896e-07	0.09 (0.04)	1.13994e-06	0.11 (0.07)	2.17474e-07	0.17 (0.22)	1.64683e-06
EPHB6	E342	3.52194e-06	0.11 (0.05)	7.19669e-08	0.08 (0.05)	8.42419e-06	0.19 (0.09)	1.31667e-06
EPHB6	P827	1.51079e-05	0.03 (0.01)	1.2164e-05	0.02 (0)	2.22503e-05	0.03 (0.01)	-2.27222e-06
EPHX1	E152	0.00217727	0.65 (0.1)	0.0025351	0.87 (0.04)	0.00151522	0.85 (0.03)	0.0031276
EPHX1	P1358	3.63403e-06	0.74 (0.09)	1.39668e-06	0.83 (0.04)	7.32549e-06	0.82 (0.06)	4.0873e-07
EPHX1	P22	0.000125669	0.87 (0.04)	0.000206522	0.92 (0.03)	2.10963e-05	0.94 (0.02)	0.000129371
EPM2A	P113	3.38842e-05	0.16 (0.08)	3.31852e-06	0.09 (0.04)	5.61226e-05	0.41 (0.14)	0.000116769
EPM2A	P64	4.64672e-05	0.04 (0.02)	8.37166e-05	0.03 (0.01)	6.28589e-06	0.05 (0.01)	7.15079e-06
EPO	E244	4.37317e-06	0.09 (0.06)	8.66997e-06	0.07 (0.06)	8.76768e-07	0.09 (0.09)	-6.17056e-06
EPO	P162	2.8513e-05	0.38 (0.15)	4.2531e-06	0.24 (0.1)	6.5952e-05	0.43 (0.11)	7.02778e-06
EPS8	E231	1.97616e-06	0.26 (0.09)	5.47168e-07	0.2 (0.07)	1.59336e-06	0.33 (0.07)	1.25248e-05
EPS8	P437	2.6342e-06	0.19 (0.07)	1.25414e-06	0.11 (0.05)	5.2257e-06	0.15 (0.06)	-1.05952e-06
ER	S60	2.15124e-06	0.14 (0.07)	-1.59648e-07	0.1 (0.07)	9.09552e-07	0.22 (0.07)	2.05657e-05
ERBB2	P59	2.47803e-05	0.03 (0.02)	3.40655e-05	0.02 (0.01)	1.6812e-05	0.03 (0.02)	6.31429e-06
ERBB3	E331	9.10358e-06	0.1 (0.04)	1.21259e-05	0.06 (0.03)	6.79893e-06	0.13 (0.06)	2.46587e-06
ERBB3	P870	1.16421e-06	0.08 (0.04)	1.38114e-06	0.06 (0.03)	9.83239e-08	0.05 (0.04)	3.76313e-06
ERBB4	P255	2.52142e-06	0.03 (0.01)	5.29105e-06	0.03 (0.01)	-4.39195e-07	0.03 (0.02)	-8.13492e-07
ERBB4	P541	1.08489e-05	0.04 (0.02)	9.92152e-06	0.02 (0.01)	8.7022e-06	0.03 (0.01)	2.84341e-05
ERCC1	P354	2.40903e-06	0.03 (0.01)	3.72058e-06	0.03 (0.02)	2.79612e-07	0.08 (0.05)	4.02063e-06
ERCC1	P440	0.000196125	0.07 (0.03)	0.000173713	0.23 (0.09)	0.000276157	0.1 (0.06)	-6.30418e-06
ERCC3	P1210	0.00262471	0.92 (0.03)	0.00208608	0.75 (0.07)	0.00329192	0.93 (0.02)	0.00307545
ERCC6	P698	1.4489e-05	0.56 (0.2)	9.54355e-07	0.42 (0.2)	3.52394e-05	0.68 (0.15)	9.75397e-07
ERG	E28	2.34393e-05	0.3 (0.15)	9.80697e-06	0.22 (0.11)	3.25268e-06	0.07 (0.05)	0.000205423
ERN1	P809	1.57175e-05	0.42 (0.16)	3.56382e-07	0.5 (0.14)	1.38463e-05	0.26 (0.09)	0.000115596
ESR1	E298	1.7951e-06	0.1 (0.08)	1.65507e-06	0.07 (0.03)	3.63309e-06	0.08 (0.04)	-5.03427e-06
ESR1	P151	6.6772e-05	0.22 (0.14)	9.63918e-05	0.07 (0.08)	3.53718e-05	0.28 (0.15)	2.91522e-05
ESR2	E66	9.89679e-08	0.07 (0.04)	-3.64277e-07	0.05 (0.03)	1.11937e-06	0.08 (0.09)	-1.16587e-06
ESR2	P162	1.36633e-05	0.18 (0.08)	2.00616e-06	0.11 (0.06)	2.92556e-05	0.29 (0.12)	1.24328e-05
ETS1	E253	3.90922e-06	0.25 (0.07)	3.4168e-07	0.22 (0.06)	4.88089e-06	0.35 (0.1)	2.12107e-05
ETS1	P559	3.14167e-05	0.03 (0.01)	4.54956e-05	0.02 (0.01)	1.90815e-05	0.04 (0.02)	3.81926e-06
ETS2	P684	5.37398e-05	0.08 (0.09)	4.85137e-05	0.03 (0.02)	7.47779e-05	0.07 (0.03)	-3.20635e-07
ETS2	P835	0.00037407	0.13 (0.09)	0.000139739	0.05 (0.01)	0.000776615	0.07 (0.03)	1.96539e-05
			Solid tissues (n=113)		Blood (n=85)		Placenta (n=19)
GENE	CpG	Mean decrease in accuracy	Mean (sd)	Decrease in accuracy	Mean (sd)	Decrease in accuracy	Mean (sd)	Decrease in accuracy
ETV1	P235	1.74501e-05	0.1 (0.07)	2.63774e-05	0.07 (0.05)	3.28255e-06	0.05 (0.02)	2.78732e-05
ETV1	P515	2.9024e-06	0.1 (0.04)	9.68306e-07	0.08 (0.03)	4.39447e-06	0.16 (0.1)	6.97388e-06
ETV6	E430	5.41179e-06	0.14 (0.06)	1.00623e-05	0.13 (0.07)	-1.10106e-07	0.1 (0.08)	7.29437e-08
EVI1	E47	1.18592e-07	0.12 (0.07)	-2.42568e-07	0.12 (0.07)	1.12611e-06	0.15 (0.2)	2.39683e-07
EVI1	P30	2.27535e-05	0.09 (0.04)	1.58121e-05	0.04 (0.02)	4.05193e-05	0.1 (0.17)	-1.22167e-05
EVI2A	E420	0.000247326	0.9 (0.05)	0.000134212	0.76 (0.1)	0.000421404	0.95 (0.03)	0.000159735
EVI2A	P94	0.0122351	0.84 (0.12)	0.00986638	0.08 (0.05)	0.0164243	0.94 (0.03)	0.00875643
EXT1	E197	-9.77847e-09	0.14 (0.06)	-2.13856e-07	0.14 (0.06)	4.64187e-07	0.21 (0.11)	-8.36508e-07
EYA4	E277	4.21991e-06	0.16 (0.09)	3.80266e-06	0.11 (0.05)	5.72545e-06	0.17 (0.14)	-1.1881e-06
EYA4	P508	1.05403e-06	0.13 (0.06)	8.31743e-07	0.09 (0.04)	2.4114e-06	0.15 (0.08)	-3.18283e-06
EYA4	P794	0.00371952	0.38 (0.16)	0.00313881	0.06 (0.02)	0.00514279	0.14 (0.05)	0.00116942
F2R	P839	0.00029389	0.61 (0.1)	0.000188073	0.34 (0.15)	0.000456098	0.75 (0.07)	0.000210998
F2R	P88	2.39389e-06	0.13 (0.05)	4.88306e-06	0.11 (0.07)	-1.47572e-07	0.18 (0.11)	1.02381e-07
FABP3	E113	7.08877e-06	0.2 (0.11)	2.06082e-06	0.12 (0.06)	1.12589e-05	0.09 (0.05)	1.73014e-05
FABP3	P598	6.58628e-06	0.13 (0.04)	1.07687e-06	0.1 (0.02)	1.61506e-05	0.14 (0.04)	-3.42626e-06
FANCA	P1006	0.0017055	0.88 (0.04)	0.00119176	0.84 (0.05)	2.93283e-05	0.41 (0.15)	0.0123616
FANCE	P356	8.50028e-05	0.14 (0.1)	4.75267e-05	0.06 (0.02)	0.000123981	0.17 (0.05)	0.000131008
FANCF	P13	7.47266e-06	0.04 (0.01)	1.12665e-05	0.04 (0.02)	3.84391e-06	0.06 (0.05)	1.72527e-06
FANCG	E207	2.75534e-05	0.07 (0.04)	4.84613e-05	0.05 (0.04)	6.32944e-06	0.1 (0.06)	7.52381e-07
FAS	P322	3.23354e-06	0.12 (0.11)	1.90291e-06	0.21 (0.1)	5.65955e-06	0.14 (0.09)	4.67338e-07
FAS	P65	2.45872e-06	0.09 (0.07)	3.3922e-06	0.08 (0.04)	1.8526e-06	0.09 (0.04)	-3.4127e-07
FASTK	P257	1.55288e-06	0.14 (0.07)	2.36634e-06	0.2 (0.1)	1.46738e-06	0.14 (0.09)	-2.99762e-06
FASTK	P598	0.000610781	0.65 (0.11)	0.000183327	0.84 (0.05)	0.0010412	0.6 (0.1)	0.00127404
FAT	P279	1.87755e-06	0.17 (0.07)	-4.85544e-08	0.13 (0.05)	5.27508e-06	0.17 (0.08)	-2.0803e-06
FAT	P973	5.94534e-06	0.09 (0.06)	3.11445e-06	0.08 (0.05)	1.37418e-06	0.04 (0.02)	3.94856e-05
FER	E119	2.11108e-06	0.31 (0.14)	5.13095e-07	0.2 (0.1)	4.6748e-06	0.3 (0.12)	-7.57937e-07
FER	P581	1.92656e-05	0.77 (0.1)	1.11143e-06	0.86 (0.06)	9.05934e-06	0.68 (0.08)	0.000179472
FES	E34	0.000126776	0.13 (0.05)	1.73846e-05	0.06 (0.02)	0.000290932	0.16 (0.06)	4.73028e-05
FES	P223	1.35798e-05	0.11 (0.06)	7.04858e-06	0.06 (0.02)	2.5989e-05	0.09 (0.05)	-3.52612e-06
FGF1	E5	0.000121467	0.78 (0.09)	2.13015e-05	0.88 (0.03)	0.000173068	0.6 (0.09)	0.000516208
FGF1	P357	0.000249968	0.75 (0.18)	4.25498e-05	0.9 (0.02)	0.000485832	0.69 (0.09)	0.000459257
FGF12	E61	1.59652e-05	0.15 (0.07)	1.4395e-05	0.14 (0.06)	1.10702e-06	0.35 (0.15)	8.2181e-05
FGF12	P210	1.16166e-05	0.09 (0.08)	7.72987e-07	0.06 (0.03)	2.65126e-05	0.26 (0.18)	8.84452e-06
FGF2	P229	0.000147001	0.18 (0.08)	5.36908e-05	0.09 (0.05)	3.51755e-05	0.46 (0.11)	0.00123936
FGF3	E198	3.44775e-05	0.03 (0.03)	1.64508e-05	0.02 (0)	5.79738e-05	0.03 (0)	3.20223e-05
FGF3	P171	1.73603e-06	0.08 (0.06)	6.34999e-07	0.05 (0.03)	2.27442e-06	0.06 (0.02)	4.28422e-06
FGF5	E16	1.58559e-06	0.09 (0.04)	1.20586e-06	0.08 (0.04)	2.84983e-06	0.17 (0.13)	-1.96421e-06
FGF5	P238	1.1887e-05	0.05 (0.03)	7.61068e-06	0.03 (0.01)	1.61501e-05	0.16 (0.19)	1.79444e-05
FGF6	E294	7.30687e-06	0.93 (0.02)	5.00134e-06	0.91 (0.03)	4.10954e-06	0.88 (0.05)	3.75986e-05
FGF6	P139	1.78287e-05	0.9 (0.07)	2.01859e-06	0.92 (0.03)	2.48086e-06	0.82 (0.09)	0.000182721
FGF7	P44	3.27136e-06	0.89 (0.05)	1.50037e-06	0.92 (0.02)	7.26817e-06	0.92 (0.03)	-2.76595e-06
FGF7	P610	1.94057e-06	0.91 (0.03)	1.28213e-06	0.92 (0.02)	2.16229e-06	0.9 (0.03)	4.2803e-06
FGF8	E183	5.26661e-05	0.05 (0.02)	2.47111e-05	0.03 (0.03)	3.65212e-05	0.21 (0.11)	0.000273291
FGF8	P473	1.17687e-05	0.06 (0.04)	2.97077e-07	0.04 (0.02)	2.54529e-05	0.13 (0.06)	2.02359e-05
FGF9	P1404	1.50385e-05	0.21 (0.05)	3.27052e-06	0.14 (0.03)	3.32516e-05	0.25 (0.07)	4.97619e-07
FGF9	P862	3.90493e-06	0.3 (0.05)	-2.31227e-07	0.29 (0.04)	3.69138e-06	0.39 (0.06)	2.73794e-05
FGFR1	E317	8.62982e-07	0.11 (0.04)	-7.26452e-08	0.09 (0.03)	2.21493e-06	0.14 (0.05)	-4.1181e-07
FGFR1	P204	9.52742e-06	0.11 (0.05)	1.11722e-05	0.06 (0.05)	1.10286e-05	0.14 (0.1)	-7.22063e-06
FGFR2	P266	2.86374e-05	0.08 (0.03)	1.62946e-05	0.04 (0.01)	3.64307e-05	0.05 (0.01)	6.833e-05
FGFR2	P460	6.44184e-06	0.45 (0.13)	1.29965e-06	0.33 (0.12)	1.45646e-05	0.51 (0.13)	1.25397e-07
FGFR3	E297	2.5479e-05	0.04 (0.01)	3.30882e-05	0.03 (0.01)	2.10838e-05	0.05 (0.02)	-6.52165e-07
FGFR3	P1152	0.000100715	0.48 (0.1)	0.000107579	0.35 (0.16)	9.29101e-06	0.21 (0.08)	0.000467306
FGFR4	P610	3.09357e-06	0.86 (0.1)	2.19867e-06	0.9 (0.03)	2.67877e-06	0.86 (0.03)	1.00674e-05
FGR	P39	1.84848e-05	0.96 (0.01)	3.45052e-06	0.94 (0.02)	4.25538e-05	0.96 (0.01)	3.38182e-06
FHIT	E19	1.46979e-06	0.04 (0.01)	1.69972e-06	0.03 (0.01)	4.61229e-07	0.04 (0.01)	4.31374e-06
FHIT	P93	2.59559e-06	0.05 (0.02)	3.25592e-06	0.04 (0.02)	1.45397e-06	0.06 (0.05)	2.01198e-06
FLI1	E29	6.23077e-06	0.16 (0.07)	2.79062e-07	0.1 (0.05)	1.2156e-05	0.3 (0.18)	1.27904e-05
FLI1	P620	9.00097e-06	0.11 (0.05)	1.137e-06	0.05 (0.03)	2.17302e-05	0.19 (0.16)	-1.46746e-06
FLJ20712	P984	1.26318e-06	0.67 (0.12)	2.00226e-06	0.77 (0.11)	1.47997e-06	0.75 (0.09)	-2.67778e-06
FLT1	E444	3.55371e-06	0.04 (0.02)	5.62203e-06	0.03 (0.01)	1.48686e-06	0.04 (0.02)	-5.88745e-07
FLT1	P302	1.93192e-06	0.08 (0.03)	1.68961e-06	0.04 (0.02)	2.8723e-06	0.07 (0.05)	-1.06508e-06
FLT1	P615	9.85586e-06	0.09 (0.05)	6.67267e-06	0.06 (0.02)	2.08567e-06	0.04 (0.01)	6.7795e-05
FLT3	E326	5.73371e-06	0.1 (0.08)	5.33708e-06	0.06 (0.03)	8.13293e-06	0.07 (0.04)	-1.44848e-06
FLT3	P302	3.68192e-05	0.08 (0.04)	5.26344e-05	0.04 (0.03)	2.35886e-05	0.09 (0.07)	-8.35958e-07
FLT4	E206	1.8469e-06	0.13 (0.05)	2.37636e-06	0.14 (0.07)	1.42947e-07	0.19 (0.06)	5.46746e-06
FLT4	P180	9.63322e-06	0.08 (0.06)	1.65365e-06	0.05 (0.02)	2.34033e-05	0.08 (0.03)	-2.42316e-06
FN1	E469	9.07691e-07	0.06 (0.03)	2.52597e-06	0.06 (0.03)	1.72023e-07	0.05 (0.03)	-4.61912e-06
FN1	P229	6.03786e-07	0.1 (0.05)	2.54352e-08	0.14 (0.06)	9.12754e-07	0.11 (0.05)	2.90258e-06
FOLR1	E368	5.05491e-05	0.91 (0.03)	1.0259e-05	0.95 (0.02)	1.17782e-05	0.84 (0.05)	0.000493375
FOSL2	E384	7.74848e-06	0.95 (0.04)	1.66898e-06	0.92 (0.03)	1.5584e-05	0.96 (0.01)	9.44127e-06
FRK	P258	0.000913907	0.72 (0.13)	0.000678343	0.91 (0.03)	0.00101526	0.3 (0.15)	0.00190005
FRK	P36	0.000288033	0.63 (0.15)	0.000129876	0.87 (0.05)	0.000408687	0.33 (0.12)	0.000732998
FRZB	E186	2.26571e-05	0.17 (0.09)	3.03688e-06	0.1 (0.04)	3.50154e-05	0.46 (0.2)	8.79549e-05
FRZB	P406	4.75334e-06	0.06 (0.02)	8.27726e-06	0.05 (0.02)	7.14292e-07	0.09 (0.08)	1.56905e-06
FVT1	P225	7.86717e-06	0.08 (0.04)	4.41966e-06	0.06 (0.02)	1.23656e-05	0.11 (0.03)	8.15e-06
FYN	P352	1.47116e-05	0.06 (0.03)	9.74464e-06	0.04 (0.02)	2.1548e-05	0.09 (0.03)	1.36572e-05
FZD7	E296	3.86609e-06	0.05 (0.02)	5.63655e-06	0.04 (0.01)	1.75074e-06	0.04 (0.01)	2.90635e-06
FZD9	E458	4.42827e-05	0.35 (0.14)	2.21905e-05	0.15 (0.07)	7.90633e-05	0.24 (0.07)	2.15692e-05
FZD9	P15	6.94232e-06	0.07 (0.05)	1.14837e-05	0.06 (0.04)	3.04133e-06	0.09 (0.05)	-2.45714e-06
FZD9	P175	2.91255e-05	0.29 (0.11)	2.14741e-06	0.19 (0.05)	7.0983e-05	0.36 (0.1)	1.05057e-05
GABRA5	E44	1.9833e-05	0.76 (0.07)	5.46108e-06	0.75 (0.06)	1.3829e-07	0.62 (0.09)	0.000199012
GABRA5	P1016	0.000262392	0.93 (0.03)	0.000130691	0.92 (0.03)	7.89345e-06	0.69 (0.13)	0.00218845
GABRA5	P862	7.74034e-05	0.91 (0.05)	4.11453e-05	0.91 (0.03)	6.44473e-06	0.71 (0.13)	0.00057311
GABRB3	E42	1.24607e-05	0.11 (0.08)	1.33371e-06	0.07 (0.03)	3.07007e-05	0.18 (0.12)	-2.64683e-06
GABRB3	P92	3.26896e-06	0.2 (0.06)	-3.81279e-07	0.17 (0.04)	2.37404e-06	0.29 (0.09)	2.88931e-05
GABRG3	E123	0.000112639	0.92 (0.04)	3.22623e-05	0.93 (0.03)	1.09342e-05	0.78 (0.07)	0.00106927
GABRG3	P75	0.000820108	0.84 (0.05)	0.000465024	0.83 (0.03)	1.8139e-05	0.54 (0.1)	0.00664025
GADD45A	P737	0.000212136	0.36 (0.11)	0.000116184	0.21 (0.09)	0.000161298	0.68 (0.1)	0.00098521
GALR1	E52	2.22717e-05	0.1 (0.06)	7.1281e-06	0.07 (0.04)	1.82311e-05	0.32 (0.16)	0.000118619
GALR1	P80	2.34631e-06	0.07 (0.03)	1.72479e-06	0.05 (0.03)	3.84795e-06	0.11 (0.05)	-2.03975e-06
GAS1	E22	2.51117e-06	0.03 (0.01)	1.76281e-06	0.03 (0.01)	3.32689e-06	0.04 (0.02)	4.04921e-06
GAS1	P754	1.31582e-05	0.03 (0.01)	1.89942e-05	0.02 (0.01)	7.10763e-06	0.05 (0.03)	4.99444e-06
GAS7	E148	8.25892e-06	0.08 (0.06)	5.14314e-06	0.04 (0.02)	1.42391e-05	0.09 (0.05)	1.17222e-06
GAS7	P622	6.46797e-06	0.3 (0.12)	8.31541e-06	0.19 (0.09)	5.62215e-06	0.15 (0.13)	-1.38759e-06
GATA6	P21	3.28396e-06	0.11 (0.06)	2.28592e-07	0.08 (0.05)	7.37424e-06	0.17 (0.06)	2.90079e-06
GATA6	P726	1.52834e-05	0.08 (0.04)	4.01625e-06	0.04 (0.02)	3.21834e-05	0.08 (0.06)	4.27778e-06
GDF10	E39	2.32193e-06	0.28 (0.07)	5.09482e-07	0.25 (0.05)	4.00858e-06	0.38 (0.09)	5.78232e-06
GDF10	P95	5.18717e-06	0.13 (0.04)	2.14868e-06	0.11 (0.03)	8.48447e-06	0.21 (0.08)	6.87352e-06
GFAP	P1214	5.34138e-06	0.89 (0.02)	6.95221e-06	0.9 (0.04)	5.13939e-06	0.89 (0.04)	-2.26746e-06
GFAP	P56	1.03848e-05	0.77 (0.1)	7.61221e-06	0.83 (0.06)	1.02662e-05	0.72 (0.08)	2.71009e-05
			Solid tissues (n=113)		Blood (n=85)		Placenta (n=19)
GENE	CpG	Mean decrease in accuracy	Mean (sd)	Decrease in accuracy	Mean (sd)	Decrease in accuracy	Mean (sd)	Decrease in accuracy
GFI1	E136	8.185e-07	0.18 (0.09)	4.55818e-07	0.14 (0.07)	-3.13103e-07	0.1 (0.05)	8.05152e-06
GFI1	P208	0.000475115	0.64 (0.14)	0.000585477	0.33 (0.12)	0.000123372	0.24 (0.09)	0.00137243
GFI1	P45	3.73306e-06	0.09 (0.04)	2.71071e-07	0.06 (0.03)	6.90219e-06	0.14 (0.05)	9.04885e-06
GJB2	E43	2.07173e-06	0.07 (0.04)	2.0706e-06	0.05 (0.04)	9.10368e-07	0.15 (0.13)	7.57071e-06
GJB2	P791	6.22388e-05	0.12 (0.05)	1.31428e-05	0.09 (0.05)	4.57597e-05	0.29 (0.08)	0.000416602
GJB2	P931	0.00251088	0.42 (0.12)	0.00104295	0.13 (0.05)	0.00406117	0.78 (0.07)	0.00461304
GLI2	E90	7.22378e-05	0.93 (0.06)	3.35472e-05	0.97 (0.01)	5.4454e-05	0.76 (0.12)	0.000397534
GLI2	P295	7.91683e-05	0.81 (0.09)	1.70544e-06	0.9 (0.04)	0.000122516	0.67 (0.11)	0.000374254
GLI3	E148	1.32209e-05	0.93 (0.02)	3.20423e-06	0.91 (0.04)	2.76926e-07	0.89 (0.02)	0.000137602
GLI3	P453	-6.02253e-08	0.17 (0.06)	-7.8853e-07	0.14 (0.06)	1.10112e-07	0.23 (0.08)	3.10808e-06
GML	E144	1.22269e-05	0.75 (0.24)	2.3999e-07	0.79 (0.21)	6.45191e-07	0.59 (0.24)	0.000142833
GML	P281	0.00123876	0.91 (0.04)	0.000744045	0.9 (0.06)	3.55197e-05	0.61 (0.11)	0.00988839
GNAS	E58	1.10657e-05	0.88 (0.04)	2.24847e-06	0.85 (0.06)	2.44655e-05	0.89 (0.04)	4.01364e-06
GNAS	P86	5.77136e-07	0.75 (0.05)	9.71547e-07	0.72 (0.06)	2.07977e-07	0.73 (0.08)	-7.97619e-07
GNG7	E310	4.09548e-06	0.96 (0.01)	3.31007e-06	0.96 (0.02)	6.60176e-07	0.94 (0.04)	2.7497e-05
GNG7	P903	7.98861e-06	0.89 (0.03)	-1.53694e-06	0.91 (0.03)	2.9747e-06	0.84 (0.05)	8.9875e-05
GNMT	E126	2.31134e-05	0.06 (0.02)	3.73269e-05	0.04 (0.02)	8.93647e-06	0.09 (0.05)	5.97612e-06
GNMT	P197	1.04917e-06	0.22 (0.06)	4.4417e-07	0.24 (0.07)	9.54896e-07	0.32 (0.08)	5.48333e-06
GP1BB	E23	0.00260152	0.32 (0.17)	0.00177337	0.06 (0.03)	0.00409198	0.23 (0.07)	0.00113307
GP1BB	P278	0.00857028	0.49 (0.16)	0.00625904	0.04 (0.02)	0.0125	0.24 (0.11)	0.00551078
GPATC3	P410	0.000132676	0.82 (0.06)	0.000217812	0.64 (0.12)	5.24923e-05	0.77 (0.09)	-1.2892e-05
GPR116	E328	0.000955629	0.94 (0.02)	0.000575181	0.97 (0.01)	4.47351e-05	0.61 (0.15)	0.0073008
GPR116	P850	5.72349e-07	0.92 (0.03)	8.64815e-07	0.95 (0.02)	7.58916e-07	0.94 (0.03)	-1.73571e-06
GPX1	E46	1.88478e-06	0.03 (0.01)	2.71977e-06	0.04 (0.02)	7.00455e-07	0.04 (0.02)	2.66667e-06
GPX1	P194	3.96461e-05	0.11 (0.04)	6.87632e-05	0.21 (0.1)	1.19991e-05	0.18 (0.1)	-1.4879e-06
GPX3	E178	1.2593e-05	0.16 (0.05)	5.39009e-07	0.11 (0.03)	2.77163e-05	0.23 (0.08)	1.29206e-05
GRB10	E85	7.77972e-07	0.09 (0.03)	-8.53414e-08	0.06 (0.03)	2.01801e-06	0.1 (0.04)	7.87374e-07
GRB10	P260	1.43479e-06	0.06 (0.03)	2.14921e-06	0.05 (0.03)	9.99984e-07	0.06 (0.03)	-1.15404e-06
GRB10	P496	1.52844e-05	0.34 (0.18)	3.13151e-06	0.24 (0.08)	3.07709e-05	0.45 (0.1)	1.57373e-05
GRB7	E71	2.65304e-05	0.19 (0.09)	5.92231e-06	0.2 (0.13)	1.211e-07	0.07 (0.03)	0.000273219
GRB7	P160	2.81785e-05	0.41 (0.1)	7.17566e-06	0.4 (0.16)	1.72738e-08	0.21 (0.06)	0.00029534
GSTM1	P266	3.80704e-05	0.39 (0.18)	1.86089e-05	0.32 (0.21)	6.39699e-06	0.8 (0.13)	0.000298811
GSTM1	P363	3.33896e-06	0.85 (0.07)	3.10219e-06	0.78 (0.13)	-4.31549e-08	0.93 (0.05)	1.99677e-05
GSTM2	E153	2.67516e-05	0.13 (0.08)	1.78011e-06	0.08 (0.04)	2.59441e-05	0.38 (0.12)	0.000179244
GSTM2	P109	4.52267e-06	0.11 (0.08)	3.42291e-06	0.08 (0.04)	3.86708e-06	0.07 (0.03)	1.57145e-05
GSTM2	P453	0.000184386	0.54 (0.12)	2.3054e-05	0.72 (0.06)	0.0003536	0.33 (0.12)	0.000417626
GSTP1	E322	8.38643e-06	0.1 (0.08)	1.13546e-05	0.05 (0.03)	3.2333e-06	0.05 (0.02)	1.30224e-05
GSTP1	P74	0.000116927	0.1 (0.03)	0.000177511	0.07 (0.03)	6.11716e-05	0.14 (0.04)	9.94538e-06
GSTP1	S153	3.33526e-05	0.05 (0.02)	5.2586e-05	0.03 (0.02)	1.37829e-05	0.06 (0.02)	7.85577e-06
GUCY2D	E419	0.00127834	0.06 (0.03)	0.000899978	0.04 (0.01)	4.21742e-05	0.8 (0.1)	0.00940505
GUCY2D	P48	0.000601413	0.24 (0.07)	0.000417018	0.17 (0.08)	1.58703e-05	0.56 (0.11)	0.00433075
H19	P1411	6.15644e-05	0.83 (0.04)	4.49406e-05	0.78 (0.05)	7.29759e-06	0.65 (0.1)	0.000411649
H19	P541	1.23381e-06	0.3 (0.19)	-9.75032e-08	0.25 (0.21)	2.8316e-07	0.2 (0.09)	1.4249e-05
HBEGF	P32	1.29406e-05	0.06 (0.03)	2.00991e-05	0.05 (0.03)	5.07716e-06	0.11 (0.07)	4.09848e-06
HBII-13	E48	0.000496863	0.9 (0.03)	0.000350895	0.92 (0.02)	1.99254e-05	0.63 (0.14)	0.00331
HBII-13	P991	3.24913e-05	0.86 (0.05)	5.0759e-06	0.87 (0.05)	1.36732e-06	0.73 (0.07)	0.000345224
HBII-52	E142	7.52314e-05	0.58 (0.11)	2.99791e-05	0.63 (0.14)	1.08153e-06	0.26 (0.11)	0.000690857
HBII-52	P563	4.78201e-05	0.86 (0.05)	1.1161e-05	0.86 (0.04)	4.41101e-06	0.71 (0.09)	0.000473608
HBII-52	P659	9.91513e-06	0.92 (0.03)	6.10357e-06	0.91 (0.05)	9.59659e-08	0.86 (0.04)	7.10126e-05
HCK	P46	3.02962e-06	0.09 (0.05)	2.67731e-06	0.07 (0.04)	4.72055e-06	0.15 (0.07)	-3.62136e-06
HCK	P858	0.000285793	0.45 (0.19)	7.86192e-05	0.17 (0.08)	0.000585078	0.52 (0.14)	0.000193229
HDAC1	P414	6.53212e-05	0.47 (0.15)	8.87542e-06	0.27 (0.07)	0.000153964	0.47 (0.14)	1.79863e-05
HDAC11	P556	5.25844e-06	0.04 (0.01)	-1.72288e-07	0.03 (0.01)	1.13404e-05	0.05 (0.03)	1.15939e-05
HDAC5	E298	2.77548e-06	0.35 (0.09)	-1.24302e-07	0.29 (0.07)	7.89829e-06	0.4 (0.1)	-2.46032e-06
HDAC7A	P344	8.03213e-07	0.9 (0.1)	8.52739e-07	0.93 (0.02)	1.35953e-06	0.93 (0.04)	-1.73889e-06
HDAC9	E38	0.000176344	0.16 (0.09)	7.31881e-05	0.09 (0.04)	5.55442e-05	0.62 (0.15)	0.00134452
HDAC9	P137	0.000146634	0.21 (0.1)	8.94607e-05	0.2 (0.05)	1.93266e-05	0.67 (0.14)	0.00101907
HFE	E273	1.0957e-05	0.04 (0.03)	1.49883e-05	0.03 (0.01)	3.57959e-06	0.29 (0.32)	1.91264e-05
HGF	E102	2.45494e-05	0.24 (0.14)	6.13469e-06	0.38 (0.12)	5.59481e-05	0.32 (0.16)	-2.18571e-06
HGF	P1293	0.00243967	0.95 (0.01)	0.00176443	0.95 (0.01)	2.01497e-05	0.77 (0.11)	0.0177381
HHIP	E94	1.10409e-06	0.13 (0.07)	4.93541e-07	0.09 (0.05)	2.36624e-06	0.14 (0.07)	-8.15873e-07
HHIP	P307	4.1273e-06	0.12 (0.05)	1.77062e-06	0.09 (0.03)	8.79658e-06	0.13 (0.04)	-1.90231e-06
HHIP	P578	1.69668e-05	0.14 (0.07)	2.00099e-05	0.21 (0.1)	1.46308e-06	0.42 (0.15)	6.28073e-05
HIC1	E151	4.53755e-05	0.07 (0.02)	7.28136e-05	0.04 (0.01)	1.94151e-05	0.07 (0.03)	1.42626e-06
HIC1	P565	1.88844e-06	0.07 (0.05)	5.49691e-07	0.04 (0.01)	3.8774e-06	0.06 (0.03)	9.46032e-07
HIC-1	S103	0.00199314	0.76 (0.13)	0.00125349	0.21 (0.17)	0.00234007	0.94 (0.05)	0.00492724
HIC2	P498	0.000141411	0.06 (0.04)	0.000216734	0.03 (0.02)	7.37243e-05	0.04 (0.03)	-6.88917e-07
HIC2	P528	1.69242e-05	0.04 (0.01)	1.40502e-05	0.03 (0.01)	2.38899e-05	0.05 (0.01)	4.30332e-06
HIF1A	P488	1.99994e-06	0.07 (0.04)	2.63684e-06	0.07 (0.05)	3.57439e-07	0.1 (0.05)	5.4627e-06
HLA-DOA	P191	1.40945e-05	0.64 (0.18)	3.01518e-06	0.49 (0.17)	1.87107e-05	0.45 (0.16)	6.15955e-05
HLA-DOA	P594	2.04755e-06	0.77 (0.05)	1.441e-06	0.79 (0.04)	3.44978e-06	0.73 (0.11)	-6.50794e-07
HLA-DOB	E432	3.7968e-05	0.84 (0.11)	4.78979e-06	0.85 (0.04)	5.08062e-05	0.74 (0.08)	0.000185785
HLA-DOB	P1114	0.000191591	0.94 (0.01)	0.000160673	0.94 (0.02)	3.38561e-06	0.84 (0.09)	0.00115943
HLA-DOB	P357	1.05349e-06	0.94 (0.02)	6.26112e-07	0.94 (0.02)	1.93886e-06	0.93 (0.03)	-1.37229e-07
HLA-DPA1	E35	0.000495332	0.87 (0.06)	0.000227766	0.66 (0.13)	0.000860859	0.91 (0.02)	0.000471072
HLA-DPA1	P205	0.000130954	0.45 (0.19)	0.000160264	0.25 (0.14)	0.000119614	0.42 (0.13)	2.02787e-05
HLA-DPA1	P28	0.000102397	0.36 (0.22)	3.56152e-05	0.16 (0.08)	0.000203842	0.46 (0.1)	5.31814e-05
HLA-DPB1	E2	2.6093e-05	0.43 (0.19)	2.73009e-05	0.25 (0.11)	2.87918e-05	0.31 (0.09)	7.81912e-06
HLA-DPB1	P540	0.000329959	0.95 (0.02)	0.000238519	0.96 (0.01)	1.01781e-05	0.8 (0.13)	0.00217135
HLA-DQA2	E93	0.000104399	0.7 (0.07)	2.23881e-05	0.73 (0.08)	1.42026e-05	0.47 (0.09)	0.00105359
HLA-DQA2	P282	8.42002e-06	0.78 (0.07)	1.31619e-05	0.71 (0.15)	1.46328e-06	0.71 (0.11)	1.18696e-05
HLA-DRA	P132	2.16491e-06	0.1 (0.06)	2.12673e-06	0.15 (0.08)	4.30228e-07	0.24 (0.13)	1.00063e-05
HLA-DRA	P77	0.000244682	0.2 (0.11)	6.25803e-05	0.07 (0.03)	0.000460321	0.57 (0.15)	0.000375257
HLA-F	E402	0.000123352	0.02 (0.01)	0.000170954	0.02 (0.01)	2.26801e-05	0.26 (0.21)	0.000260536
HLF	E192	1.27735e-05	0.04 (0.02)	1.31485e-05	0.03 (0.01)	6.6142e-06	0.12 (0.1)	3.65678e-05
HOXA11	E35	3.97266e-05	0.15 (0.07)	5.30511e-06	0.07 (0.03)	9.27348e-05	0.25 (0.15)	1.33589e-05
HOXA11	P698	0.000311826	0.28 (0.18)	0.000212756	0.07 (0.04)	0.00039006	0.69 (0.21)	0.000572184
HOXA11	P92	7.99643e-05	0.1 (0.04)	7.41477e-05	0.07 (0.04)	1.71628e-05	0.32 (0.13)	0.000353214
HOXA5	E187	0.000150868	0.71 (0.19)	5.43315e-05	0.93 (0.05)	0.000167807	0.32 (0.18)	0.000663513
HOXA5	P1324	4.58628e-06	0.2 (0.13)	1.57692e-06	0.27 (0.19)	1.08663e-06	0.12 (0.07)	3.87421e-05
HOXA5	P479	0.000189896	0.74 (0.12)	5.18858e-05	0.91 (0.03)	0.000256118	0.43 (0.16)	0.000761254
HOXA9	E252	0.000129654	0.18 (0.15)	2.39038e-05	0.07 (0.03)	0.000251902	0.68 (0.18)	0.000235106
HOXA9	P1141	0.000508265	0.25 (0.16)	0.000123878	0.07 (0.02)	0.000967985	0.63 (0.19)	0.000790099
HOXA9	P303	0.00142794	0.17 (0.11)	0.000242685	0.02 (0.01)	0.00307454	0.51 (0.19)	0.00132908
HOXB13	E21	6.34483e-06	0.28 (0.15)	7.34735e-06	0.41 (0.29)	3.14403e-06	0.32 (0.09)	1.56786e-05
HOXB13	P17	0.000168746	0.18 (0.09)	1.87043e-05	0.07 (0.04)	0.000408599	0.17 (0.06)	1.23069e-05
HOXB2	P488	2.57264e-05	0.74 (0.11)	1.838e-05	0.87 (0.05)	1.22754e-05	0.92 (0.06)	0.000124699
HOXB2	P99	9.26957e-05	0.54 (0.12)	1.99851e-05	0.62 (0.08)	3.67809e-05	0.81 (0.04)	0.000822496
HOXC6	P456	0.000497696	0.15 (0.07)	0.000274808	0.12 (0.06)	6.80037e-05	0.68 (0.12)	0.00390968
HOXC6	P585	0.000907048	0.16 (0.05)	0.000651983	0.17 (0.08)	8.01151e-06	0.54 (0.11)	0.00667474
			Solid tissues (n=113)		Blood (n=85)		Placenta (n=19)
GENE	CpG	Mean decrease in accuracy	Mean (sd)	Decrease in accuracy	Mean (sd)	Decrease in accuracy	Mean (sd)	Decrease in accuracy
HPN	P374	0.00139099	0.45 (0.13)	0.000720772	0.09 (0.06)	0.00215367	0.74 (0.12)	0.00206469
HPN	P823	0.000679325	0.83 (0.09)	0.00053733	0.4 (0.18)	0.000986234	0.81 (0.09)	0.000216649
HPSE	P29	4.43644e-06	0.11 (0.05)	3.31117e-06	0.07 (0.04)	7.04634e-06	0.14 (0.07)	-1.44127e-06
HPSE	P93	6.13649e-06	0.12 (0.07)	3.17313e-06	0.11 (0.07)	5.97242e-06	0.25 (0.08)	2.33501e-05
HRASLS	E72	1.11491e-06	0.05 (0.03)	5.49045e-07	0.04 (0.02)	2.79921e-06	0.07 (0.05)	-3.28023e-06
HRASLS	P353	3.69137e-06	0.53 (0.1)	1.06256e-06	0.6 (0.1)	5.7255e-07	0.48 (0.08)	3.54894e-05
HS3ST2	E145	9.36035e-06	0.18 (0.13)	2.32424e-06	0.1 (0.07)	1.24802e-05	0.5 (0.24)	3.33452e-05
HS3ST2	P171	6.85872e-06	0.15 (0.07)	4.29884e-07	0.1 (0.04)	1.47133e-05	0.3 (0.15)	8.29004e-06
HS3ST2	P546	4.66767e-05	0.25 (0.1)	1.55499e-06	0.14 (0.05)	0.00010764	0.39 (0.1)	3.93364e-05
HSD17B12	E145	1.89565e-05	0.04 (0.02)	1.55987e-06	0.03 (0.01)	2.97798e-05	0.07 (0.01)	7.08527e-05
HSD17B12	P97	1.22339e-05	0.06 (0.03)	1.62829e-05	0.05 (0.01)	1.00562e-05	0.06 (0.01)	6.5873e-08
HSPA2	P162	9.56755e-06	0.89 (0.03)	1.07413e-05	0.92 (0.03)	7.61599e-06	0.87 (0.04)	1.29321e-05
HTR1B	E232	0.000167013	0.21 (0.11)	6.08436e-05	0.13 (0.04)	0.000135109	0.71 (0.14)	0.00094975
HTR1B	P107	1.30635e-05	0.39 (0.14)	8.97942e-06	0.29 (0.15)	6.81617e-06	0.6 (0.13)	6.06177e-05
HTR1B	P222	2.96831e-05	0.1 (0.09)	1.84725e-05	0.04 (0.03)	2.08832e-05	0.52 (0.23)	0.000122475
HTR2A	E10	5.50472e-05	0.87 (0.06)	4.58647e-06	0.92 (0.03)	3.99544e-05	0.77 (0.05)	0.000445066
HTR2A	P853	1.00354e-07	0.12 (0.07)	3.07137e-07	0.09 (0.05)	2.71912e-07	0.13 (0.09)	-2.1619e-06
IAPP	E280	0.00118018	0.94 (0.02)	0.000838598	0.94 (0.02)	1.8882e-05	0.78 (0.05)	0.00824104
ICA1	P61	1.52448e-05	0.05 (0.03)	2.00439e-05	0.03 (0.01)	1.17658e-05	0.04 (0.01)	-1.68687e-06
ICA1	P72	2.63369e-05	0.09 (0.03)	1.26138e-05	0.05 (0.02)	5.14924e-05	0.08 (0.04)	-5.0132e-06
ICAM1	E242	1.53334e-06	0.11 (0.04)	2.29725e-06	0.07 (0.04)	1.16933e-06	0.15 (0.1)	-1.64127e-06
ICAM1	P119	8.50714e-05	0.08 (0.04)	0.000138703	0.07 (0.05)	3.41521e-05	0.12 (0.07)	3.85238e-06
ICAM1	P386	0.00013043	0.16 (0.14)	8.70551e-05	0.04 (0.03)	0.000209686	0.25 (0.12)	3.96726e-05
ID1	P659	6.25653e-07	0.07 (0.02)	7.7522e-07	0.07 (0.02)	5.16201e-07	0.12 (0.06)	7.46032e-08
ID1	P880	1.56221e-05	0.23 (0.08)	7.37429e-07	0.14 (0.06)	3.79843e-05	0.27 (0.12)	3.13333e-06
IFNG	E293	5.39886e-05	0.74 (0.1)	5.55659e-06	0.84 (0.05)	2.29738e-05	0.48 (0.1)	0.000495529
IFNG	P188	8.98339e-05	0.89 (0.04)	3.12194e-05	0.91 (0.02)	2.05223e-05	0.74 (0.06)	0.000770892
IFNG	P459	2.50206e-05	0.86 (0.05)	8.96531e-07	0.9 (0.03)	1.69513e-05	0.75 (0.07)	0.000205675
IFNGR1	P307	3.84117e-08	0.05 (0.02)	3.9611e-07	0.06 (0.03)	-8.40074e-08	0.06 (0.03)	-1.45476e-06
IFNGR2	E164	4.58354e-06	0.11 (0.04)	5.21116e-06	0.08 (0.03)	4.07167e-06	0.16 (0.09)	4.00635e-06
IFNGR2	P377	0.000110481	0.53 (0.13)	0.000122154	0.29 (0.11)	4.03245e-05	0.18 (0.1)	0.000338799
IGF1	E394	0.00315848	0.6 (0.12)	0.00190147	0.85 (0.04)	0.00466546	0.25 (0.13)	0.0042377
IGF1	P933	0.00260403	0.27 (0.09)	0.00310187	0.66 (0.09)	0.00255982	0.54 (0.12)	0.000135307
IGF1R	E186	1.70939e-05	0.04 (0.01)	2.87054e-05	0.03 (0.01)	5.15219e-06	0.03 (0.01)	-2.05628e-08
IGF1R	P325	1.17601e-06	0.04 (0.01)	8.0208e-08	0.03 (0.01)	6.48209e-07	0.04 (0.01)	1.21751e-05
IGF2	E134	2.03755e-06	0.16 (0.1)	6.41635e-07	0.09 (0.06)	4.15036e-06	0.2 (0.16)	5.5e-07
IGF2	P1036	8.63326e-06	0.08 (0.03)	2.16752e-06	0.05 (0.02)	1.55312e-05	0.14 (0.05)	1.39867e-05
IGF2	P36	-3.43896e-07	0.13 (0.06)	2.54246e-07	0.11 (0.07)	-6.6372e-07	0.15 (0.09)	-1.88889e-06
IGF2AS	E4	3.842e-07	0.29 (0.09)	-7.64221e-08	0.23 (0.09)	8.73564e-07	0.23 (0.08)	1.08586e-07
IGF2AS	P203	2.31195e-06	0.34 (0.11)	1.75593e-06	0.24 (0.1)	4.04008e-06	0.41 (0.17)	-3.43579e-06
IGF2R	P396	1.43766e-05	0.14 (0.06)	1.63888e-06	0.08 (0.03)	2.59381e-05	0.09 (0.03)	3.65392e-05
IGFBP1	E48	6.84903e-05	0.55 (0.14)	2.84581e-06	0.38 (0.09)	0.000117417	0.78 (0.06)	0.000239718
IGFBP1	P12	0.000185151	0.47 (0.15)	9.77267e-05	0.36 (0.14)	6.75088e-06	0.82 (0.11)	0.00151317
IGFBP2	P306	1.08206e-05	0.08 (0.07)	7.21291e-06	0.03 (0.02)	1.77317e-05	0.04 (0.02)	3.69139e-06
IGFBP2	P353	3.39837e-06	0.22 (0.08)	1.43158e-06	0.14 (0.05)	7.28882e-06	0.21 (0.09)	-1.7342e-06
IGFBP3	E65	1.77308e-05	0.07 (0.05)	4.06772e-06	0.07 (0.04)	3.37159e-05	0.05 (0.01)	2.6524e-05
IGFBP3	P1035	2.17092e-05	0.05 (0.02)	5.11478e-06	0.02 (0.01)	4.90588e-05	0.08 (0.08)	2.69055e-06
IGFBP3	P423	9.55665e-06	0.1 (0.1)	2.82358e-06	0.05 (0.02)	1.98703e-05	0.15 (0.11)	2.92165e-06
IGFBP5	E144	5.55034e-05	0.08 (0.04)	2.76109e-06	0.05 (0.02)	0.000119997	0.16 (0.07)	7.85119e-05
IGFBP5	P9	5.17022e-06	0.11 (0.06)	1.91609e-06	0.16 (0.07)	1.08141e-05	0.11 (0.07)	5.01659e-07
IGFBP6	E47	-7.2877e-08	0.36 (0.07)	-1.50741e-07	0.37 (0.06)	-2.75373e-09	0.35 (0.07)	1.19242e-07
IGFBP6	P328	1.75182e-06	0.12 (0.08)	8.21411e-07	0.13 (0.06)	3.72498e-06	0.19 (0.07)	-7e-07
IGFBP7	P297	9.68098e-06	0.39 (0.13)	6.81968e-07	0.3 (0.13)	2.26188e-05	0.53 (0.12)	5.29076e-06
IGFBP7	P371	6.68847e-05	0.04 (0.04)	0.000110725	0.03 (0.01)	2.2801e-05	0.05 (0.05)	9.08463e-06
IGSF4	P454	2.55465e-05	0.03 (0.01)	1.18171e-05	0.02 (0.01)	4.90454e-05	0.03 (0.01)	-9.91786e-08
IGSF4	P86	9.1039e-07	0.12 (0.06)	1.0306e-06	0.07 (0.04)	9.50053e-07	0.1 (0.05)	3.68326e-07
IGSF4C	E65	1.14431e-05	0.62 (0.17)	1.2262e-06	0.49 (0.12)	2.61614e-05	0.71 (0.1)	1.83571e-06
IGSF4C	P533	1.79538e-06	0.07 (0.02)	2.1844e-06	0.07 (0.03)	1.98477e-07	0.13 (0.06)	5.45887e-06
IHH	E186	9.96885e-07	0.1 (0.06)	3.03602e-07	0.08 (0.06)	1.52344e-06	0.26 (0.19)	2.34459e-06
IHH	P246	2.15037e-06	0.14 (0.06)	-1.4187e-07	0.12 (0.05)	6.52773e-06	0.19 (0.08)	-2.56118e-06
IHH	P529	1.3749e-06	0.07 (0.05)	1.5021e-06	0.05 (0.02)	7.17406e-07	0.08 (0.03)	3.21991e-06
IL10	P348	0.00511164	0.94 (0.02)	0.00312236	0.65 (0.13)	0.00796635	0.96 (0.01)	0.00470276
IL10	P85	0.0119878	0.77 (0.1)	0.00965855	0.19 (0.08)	0.0161843	0.91 (0.05)	0.00823375
IL11	P11	9.15604e-07	0.07 (0.03)	4.90281e-07	0.05 (0.02)	9.56403e-07	0.1 (0.06)	2.37619e-06
IL12A	E287	2.37996e-07	0.03 (0.01)	3.74008e-07	0.03 (0.01)	-6.0871e-08	0.04 (0.01)	6.5e-07
IL12B	E25	0.000162925	0.92 (0.03)	0.000155645	0.89 (0.04)	1.03883e-05	0.81 (0.08)	0.000889732
IL12B	P1453	0.000293137	0.81 (0.06)	0.000194719	0.88 (0.03)	0.000323653	0.65 (0.08)	0.000782753
IL12B	P392	5.35945e-05	0.75 (0.15)	5.24808e-06	0.81 (0.12)	6.32494e-06	0.28 (0.17)	0.000569788
IL13	E75	2.17819e-06	0.95 (0.01)	3.77747e-06	0.95 (0.02)	1.79456e-07	0.96 (0.02)	2.07771e-06
IL16	P93	1.3112e-05	0.69 (0.1)	1.97397e-05	0.74 (0.2)	6.34184e-06	0.63 (0.17)	5.89639e-06
IL17RB	E164	9.20606e-06	0.16 (0.09)	3.1407e-06	0.09 (0.05)	8.83497e-06	0.05 (0.04)	4.59854e-05
IL17RB	P788	3.89564e-05	0.05 (0.03)	7.00551e-05	0.03 (0.02)	6.24425e-06	0.04 (0.02)	4.48492e-06
IL18BP	E285	3.08803e-05	0.76 (0.09)	4.7525e-06	0.87 (0.02)	7.4636e-05	0.82 (0.05)	-2.8158e-06
IL18BP	P51	0.0122705	0.55 (0.15)	0.00997975	0.06 (0.02)	0.0164724	0.79 (0.06)	0.00824056
IL1A	E113	4.41498e-06	0.96 (0.01)	2.22836e-06	0.96 (0.01)	8.55789e-06	0.96 (0.02)	-9.84848e-08
IL1B	P582	1.24117e-05	0.9 (0.05)	3.19792e-06	0.88 (0.02)	2.79605e-05	0.9 (0.04)	-3.27961e-06
IL1B	P829	1.10451e-05	0.54 (0.13)	4.69508e-06	0.51 (0.17)	9.77436e-07	0.43 (0.07)	9.613e-05
IL1RN	E42	3.40314e-05	0.82 (0.13)	3.38859e-05	0.93 (0.03)	3.51346e-05	0.93 (0.03)	2.66861e-05
IL1RN	P93	0.000409484	0.67 (0.15)	0.000214899	0.88 (0.05)	0.000612251	0.85 (0.02)	0.000702831
IL2	P607	2.00368e-05	0.86 (0.06)	5.29956e-07	0.91 (0.03)	1.80455e-05	0.79 (0.08)	0.000145341
IL3	P556	9.20659e-07	0.95 (0.01)	1.82294e-06	0.95 (0.02)	-2.16864e-07	0.96 (0.02)	9.42785e-07
IL4	P262	6.53627e-07	0.86 (0.04)	8.08321e-07	0.84 (0.08)	-1.04683e-07	0.88 (0.04)	2.12864e-06
IL6	E168	9.2809e-07	0.23 (0.09)	8.75478e-07	0.21 (0.09)	1.44896e-06	0.31 (0.13)	-1.19293e-06
IL6	P213	2.52237e-05	0.16 (0.1)	7.72755e-06	0.06 (0.03)	5.17136e-05	0.17 (0.08)	7.20332e-06
IL6	P611	0.000121501	0.13 (0.08)	0.000174051	0.05 (0.03)	7.6035e-05	0.07 (0.04)	1.28778e-05
IL8	E118	6.52873e-06	0.28 (0.2)	7.96877e-06	0.3 (0.17)	2.41974e-06	0.48 (0.12)	1.66111e-05
IL8	P83	1.08101e-05	0.56 (0.23)	1.27971e-05	0.41 (0.23)	6.00422e-06	0.34 (0.2)	2.11684e-05
IMPACT	P186	8.2169e-05	0.04 (0.02)	0.00014077	0.03 (0.02)	2.31438e-05	0.04 (0.04)	9.95455e-07
IMPACT	P234	9.18261e-06	0.07 (0.04)	1.58287e-05	0.05 (0.03)	2.96889e-06	0.05 (0.04)	1.2215e-07
INHA	P1144	3.21693e-05	0.1 (0.04)	4.01301e-06	0.06 (0.03)	7.18574e-05	0.23 (0.17)	2.43892e-05
INHA	P1189	1.55004e-06	0.1 (0.04)	4.56449e-07	0.08 (0.04)	3.08369e-06	0.17 (0.09)	8.53175e-07
INS	P248	0.00106099	0.86 (0.04)	0.000864604	0.85 (0.05)	7.89897e-06	0.51 (0.15)	0.00674182
INS	P804	0.00129296	0.93 (0.07)	0.000832559	0.94 (0.02)	1.84718e-05	0.77 (0.05)	0.0100115
INSR	E97	9.60628e-07	0.17 (0.06)	1.22124e-06	0.15 (0.05)	5.55901e-07	0.19 (0.07)	1.40476e-06
INSR	P1063	4.48247e-06	0.18 (0.1)	6.5439e-06	0.11 (0.07)	1.91019e-06	0.15 (0.13)	3.9176e-06
IPF1	P234	5.92699e-05	0.42 (0.13)	7.60501e-06	0.25 (0.09)	0.000139079	0.58 (0.21)	8.61898e-06
IPF1	P750	0.000720513	0.47 (0.15)	0.000456612	0.31 (0.11)	0.000102614	0.91 (0.03)	0.00515727
IRAK3	E130	1.46019e-05	0.05 (0.05)	7.48332e-06	0.03 (0.01)	2.71253e-05	0.07 (0.03)	1.43651e-06
IRAK3	P13	1.75204e-05	0.05 (0.05)	2.32487e-05	0.03 (0.01)	1.31094e-05	0.04 (0.01)	3.92006e-06
IRAK3	P185	3.06258e-05	0.35 (0.12)	3.2972e-05	0.19 (0.1)	3.0194e-05	0.5 (0.14)	1.6777e-05
			Solid tissues (n=113)		Blood (n=85)		Placenta (n=19)
GENE	CpG	Mean decrease in accuracy	Mean (sd)	Decrease in accuracy	Mean (sd)	Decrease in accuracy	Mean (sd)	Decrease in accuracy
IRF5	E101	3.07919e-05	0.15 (0.08)	2.94894e-05	0.07 (0.05)	3.65456e-05	0.28 (0.12)	1.4627e-05
IRF5	P123	5.59575e-06	0.1 (0.03)	-3.17413e-07	0.09 (0.01)	1.4579e-05	0.12 (0.05)	1.92857e-07
IRF7	E236	1.2334e-06	0.23 (0.08)	1.86592e-06	0.25 (0.08)	8.98411e-08	0.35 (0.13)	2.14134e-06
IRF7	P277	5.96602e-05	0.05 (0.04)	3.70011e-05	0.03 (0.01)	3.27836e-05	0.36 (0.16)	0.000322623
ISL1	E87	2.01998e-05	0.3 (0.15)	2.66962e-06	0.2 (0.11)	4.69257e-05	0.37 (0.1)	7.64545e-06
ISL1	P379	1.80036e-05	0.1 (0.06)	2.12464e-06	0.05 (0.02)	4.35199e-05	0.12 (0.11)	-2.04452e-06
ISL1	P554	5.4606e-06	0.16 (0.09)	1.17717e-06	0.08 (0.05)	1.16343e-05	0.37 (0.25)	2.27058e-06
ITGA2	E120	9.93345e-06	0.05 (0.02)	1.61091e-06	0.03 (0.02)	2.36115e-05	0.07 (0.03)	-8.33333e-07
ITGA2	P26	3.57456e-07	0.08 (0.03)	8.3279e-07	0.07 (0.04)	-4.15377e-08	0.08 (0.06)	-1.52381e-06
ITGA6	P298	5.5978e-06	0.3 (0.15)	3.5581e-07	0.22 (0.14)	1.2237e-05	0.47 (0.15)	7.43124e-06
ITGA6	P718	7.88903e-06	0.95 (0.02)	4.93197e-06	0.94 (0.02)	1.26412e-06	0.92 (0.03)	5.59439e-05
ITGB1	P451	8.94834e-07	0.18 (0.08)	1.08048e-06	0.19 (0.1)	-5.55556e-08	0.25 (0.06)	3.26371e-06
ITGB4	E144	4.92301e-06	0.06 (0.03)	3.06289e-06	0.05 (0.02)	7.95756e-06	0.09 (0.04)	3.2381e-06
ITGB4	P517	1.26176e-06	0.22 (0.07)	7.6449e-07	0.22 (0.08)	8.49652e-07	0.31 (0.1)	5.34603e-06
ITK	E166	1.95108e-05	0.95 (0.02)	1.31363e-05	0.92 (0.03)	2.99515e-05	0.92 (0.05)	1.27169e-05
ITK	P114	0.000571481	0.91 (0.04)	0.000439846	0.88 (0.04)	1.5823e-05	0.7 (0.09)	0.0037585
ITPR2	P804	3.35128e-05	0.1 (0.05)	4.38288e-05	0.06 (0.02)	2.26713e-05	0.09 (0.03)	2.37252e-05
ITPR3	E86	1.45776e-05	0.03 (0.02)	2.58539e-05	0.03 (0.02)	3.67705e-06	0.04 (0.04)	-1.85491e-06
ITPR3	P1112	7.50072e-06	0.03 (0.01)	1.19794e-05	0.02 (0.01)	3.09616e-06	0.03 (0.02)	-2.36508e-07
JAG1	P66	8.58049e-07	0.13 (0.06)	2.20564e-06	0.13 (0.08)	-4.81589e-07	0.12 (0.05)	-1.04906e-07
JAG2	E54	1.75087e-05	0.04 (0.02)	5.69549e-06	0.02 (0.01)	3.70161e-05	0.04 (0.02)	1.90873e-06
JAG2	P264	2.34071e-07	0.05 (0.04)	3.93865e-08	0.04 (0.02)	2.13689e-08	0.05 (0.02)	2.24531e-06
JAK2	P772	9.02036e-06	0.07 (0.03)	1.3495e-05	0.08 (0.07)	2.25954e-06	0.14 (0.06)	1.08869e-05
JAK3	E64	0.00122334	0.11 (0.05)	0.000819731	0.06 (0.03)	6.28372e-05	0.75 (0.09)	0.00909433
JAK3	P1075	6.08895e-05	0.74 (0.13)	9.2888e-05	0.83 (0.11)	1.09722e-05	0.88 (0.08)	9.8214e-05
JAK3	P156	0.00560249	0.37 (0.16)	0.00355557	0.05 (0.03)	0.00797049	0.88 (0.05)	0.0078093
JUNB	P1149	1.31882e-06	0.1 (0.02)	2.99332e-07	0.11 (0.02)	2.57706e-06	0.13 (0.03)	1.62792e-06
KCNK4	E3	3.30195e-05	0.27 (0.1)	4.00049e-06	0.22 (0.1)	1.58283e-06	0.1 (0.03)	0.000366719
KCNK4	P171	9.53874e-07	0.45 (0.11)	2.12437e-06	0.51 (0.13)	2.91743e-08	0.46 (0.14)	-1.37937e-06
KCNQ1	E349	3.43304e-06	0.1 (0.04)	1.89051e-06	0.08 (0.04)	5.04732e-06	0.17 (0.09)	4.96515e-06
KCNQ1	P546	3.2917e-05	0.21 (0.06)	5.64153e-05	0.17 (0.07)	8.07336e-06	0.33 (0.16)	8.24341e-06
KDR	E79	1.74329e-06	0.07 (0.06)	3.28652e-06	0.06 (0.03)	1.09701e-06	0.09 (0.05)	-3.89834e-06
KDR	P445	3.23368e-05	0.05 (0.07)	1.18442e-05	0.02 (0.01)	3.13053e-05	0.23 (0.16)	0.000150075
KIAA0125	E29	0.000589749	0.9 (0.03)	0.000333502	0.94 (0.02)	8.66289e-05	0.63 (0.12)	0.00438155
KIAA1804	P689	0.000178559	0.13 (0.07)	0.000152897	0.05 (0.02)	0.000241068	0.16 (0.08)	6.35556e-05
KIT	P367	0.000137834	0.1 (0.06)	0.000195129	0.04 (0.02)	9.6314e-05	0.11 (0.04)	-2.76652e-06
KIT	P405	2.36477e-05	0.09 (0.05)	3.09238e-06	0.05 (0.02)	5.37078e-05	0.11 (0.03)	9.95794e-06
KLF5	E190	4.86814e-06	0.08 (0.03)	-6.58212e-07	0.05 (0.02)	1.16089e-05	0.11 (0.05)	5.75235e-06
KLF5	P13	3.28236e-06	0.07 (0.03)	1.86821e-06	0.06 (0.04)	3.11829e-06	0.12 (0.05)	1.20434e-05
KLK10	P268	1.42988e-05	0.18 (0.13)	1.64637e-05	0.09 (0.03)	1.21624e-05	0.23 (0.11)	1.01983e-05
KLK11	P103	0.000438769	0.78 (0.11)	0.000174977	0.88 (0.03)	0.000222223	0.38 (0.09)	0.00302825
KLK11	P1290	0.00100931	0.92 (0.02)	0.000674077	0.92 (0.02)	1.38419e-05	0.77 (0.08)	0.00746614
KRAS	E82	5.80441e-07	0.64 (0.09)	2.16131e-08	0.55 (0.11)	1.31745e-06	0.66 (0.09)	1.2373e-06
KRAS	P651	1.88209e-05	0.08 (0.02)	7.56978e-06	0.05 (0.01)	3.44616e-05	0.08 (0.02)	1.44627e-05
KRT1	P798	0.00123766	0.82 (0.06)	0.000723164	0.86 (0.03)	3.10687e-05	0.52 (0.08)	0.00994218
KRT13	P341	1.73539e-05	0.85 (0.12)	1.18467e-05	0.93 (0.02)	2.78241e-05	0.91 (0.02)	5.86852e-06
KRT13	P676	7.12868e-05	0.83 (0.09)	8.30531e-05	0.72 (0.08)	3.79964e-05	0.75 (0.05)	0.000158147
KRT5	E196	1.68176e-05	0.91 (0.09)	4.8885e-06	0.95 (0.02)	1.78777e-05	0.87 (0.07)	8.15256e-05
KRT5	P308	1.40102e-05	0.81 (0.09)	2.59593e-06	0.86 (0.04)	8.48257e-06	0.74 (0.06)	0.000104639
LAMB1	E144	6.08085e-06	0.17 (0.07)	1.67566e-06	0.15 (0.08)	3.9933e-06	0.29 (0.07)	3.77618e-05
LAMC1	E466	1.49102e-05	0.03 (0.01)	2.12905e-05	0.02 (0.01)	8.87694e-06	0.04 (0.02)	4.88119e-06
LAMC1	P808	3.04649e-06	0.09 (0.02)	6.32661e-07	0.06 (0.03)	3.64367e-06	0.11 (0.02)	1.26589e-05
LAT	E46	0.0122564	0.73 (0.1)	0.00991448	0.07 (0.03)	0.0165376	0.83 (0.08)	0.00821551
LCK	E28	0.000169462	0.92 (0.03)	0.000110725	0.84 (0.04)	0.000282222	0.91 (0.04)	1.19869e-05
LCN2	P141	4.16792e-06	0.89 (0.07)	1.91857e-06	0.84 (0.06)	8.14295e-06	0.9 (0.04)	-3.93495e-08
LCN2	P86	2.62419e-06	0.76 (0.14)	7.26251e-07	0.72 (0.08)	3.05041e-06	0.85 (0.07)	1.17501e-05
LEFTY2	P561	1.94567e-05	0.47 (0.12)	9.24041e-06	0.65 (0.08)	3.40163e-05	0.65 (0.11)	1.70931e-05
LEFTY2	P719	0.000886899	0.84 (0.06)	0.00105232	0.93 (0.02)	0.000275621	0.94 (0.01)	0.00275637
LIF	E208	1.32839e-05	0.04 (0.01)	2.58264e-06	0.03 (0.01)	2.89569e-05	0.04 (0.01)	3.15317e-06
LIF	P383	0.000201657	0.42 (0.11)	0.000145599	0.37 (0.09)	1.14986e-05	0.71 (0.09)	0.00132
LIG3	P622	0.00146222	0.62 (0.14)	0.0011792	0.85 (0.04)	0.00166911	0.31 (0.12)	0.00235851
LIG4	P194	9.81944e-06	0.04 (0.01)	1.21671e-05	0.03 (0.02)	4.37909e-06	0.06 (0.03)	1.98805e-05
LIMK1	P709	0.000215982	0.85 (0.09)	0.00017849	0.94 (0.02)	0.000242757	0.93 (0.03)	0.000321879
LMO1	E265	1.54114e-06	0.13 (0.05)	1.47677e-06	0.11 (0.06)	5.18251e-07	0.23 (0.12)	6.44531e-06
LMO1	P169	2.34921e-05	0.04 (0.01)	4.33164e-05	0.04 (0.02)	2.74447e-06	0.03 (0.01)	-1.70563e-07
LMO2	E148	0.00818715	0.91 (0.05)	0.00559852	0.35 (0.12)	0.0122069	0.93 (0.06)	0.00631989
LMO2	P794	0.00560741	0.89 (0.07)	0.00387461	0.33 (0.14)	0.00822285	0.96 (0.02)	0.00472964
LMTK2	P1034	6.55293e-06	0.62 (0.08)	3.06501e-06	0.57 (0.09)	1.28676e-05	0.56 (0.1)	-2.03968e-07
LOX	P313	2.30572e-06	0.17 (0.07)	8.2187e-07	0.1 (0.04)	5.34069e-06	0.16 (0.1)	-2.11436e-06
LOX	P71	4.39074e-07	0.06 (0.02)	6.27204e-07	0.06 (0.03)	5.99785e-07	0.07 (0.06)	-1.65556e-06
LRP2	E20	0.000147795	0.05 (0.01)	9.1795e-05	0.03 (0.01)	0.000245433	0.06 (0.02)	4.28374e-05
LRRC32	E157	2.45031e-07	0.94 (0.02)	-1.60784e-07	0.95 (0.01)	8.72114e-07	0.96 (0.02)	-5.9127e-07
LRRC32	P865	6.68478e-06	0.04 (0.01)	4.82996e-06	0.03 (0.01)	1.02912e-05	0.06 (0.03)	2.76429e-06
LRRK1	P39	2.43252e-06	0.94 (0.02)	4.10113e-07	0.92 (0.02)	5.23499e-06	0.94 (0.03)	2.39365e-06
LRRK1	P834	4.26067e-07	0.67 (0.1)	-4.07941e-08	0.67 (0.06)	1.31095e-06	0.69 (0.1)	-6.85714e-07
LTA	E28	4.05916e-05	0.84 (0.13)	-3.05517e-07	0.7 (0.13)	0.000100939	0.91 (0.03)	2.68667e-05
LTA	P214	0.000925827	0.9 (0.04)	0.000521021	0.68 (0.12)	0.00162307	0.9 (0.06)	0.000299967
LTB4R	E64	0.0123054	0.8 (0.08)	0.00992886	0.18 (0.04)	0.0166171	0.9 (0.05)	0.00827089
LTB4R	P163	0.0122936	0.86 (0.05)	0.00991538	0.32 (0.09)	0.0166216	0.94 (0.02)	0.00828901
LY6G6E	P45	0.00157741	0.71 (0.16)	0.000945882	0.93 (0.03)	0.00231128	0.6 (0.11)	0.00222879
LYN	E353	9.57047e-07	0.15 (0.06)	1.7305e-06	0.14 (0.07)	2.29077e-07	0.17 (0.11)	-8.46825e-07
LYN	P241	1.93386e-05	0.08 (0.03)	2.858e-05	0.05 (0.02)	9.9573e-06	0.09 (0.03)	3.00563e-06
MAD2L1	E93	2.27753e-07	0.75 (0.05)	-8.77624e-07	0.78 (0.04)	8.03001e-07	0.73 (0.08)	4.0715e-06
MAF	E77	1.23205e-07	0.12 (0.05)	2.02715e-07	0.09 (0.06)	2.6435e-07	0.15 (0.07)	-1.64683e-06
MAF	P826	4.17405e-06	0.05 (0.03)	6.56973e-06	0.05 (0.06)	5.42098e-07	0.23 (0.27)	7.00786e-06
MAGEL2	E166	1.31639e-06	0.91 (0.03)	1.29653e-06	0.88 (0.03)	2.211e-06	0.87 (0.07)	-3.13975e-06
MAGEL2	P170	1.70423e-05	0.91 (0.02)	9.04246e-06	0.9 (0.03)	3.65183e-07	0.86 (0.05)	0.000143767
MALT1	P406	2.46139e-07	0.09 (0.04)	7.39813e-07	0.08 (0.05)	3.95328e-07	0.08 (0.07)	-3.2904e-06
MAP2K6	E297	8.02244e-06	0.11 (0.09)	1.05495e-05	0.08 (0.06)	6.64342e-06	0.14 (0.11)	-2.07388e-06
MAP2K6	P297	1.22919e-05	0.15 (0.04)	6.59723e-07	0.2 (0.05)	9.92138e-06	0.1 (0.03)	9.30197e-05
MAP3K1	E81	1.43805e-05	0.22 (0.14)	1.75846e-06	0.09 (0.06)	3.43137e-05	0.17 (0.09)	1.19846e-06
MAP3K1	P7	0.000761927	0.2 (0.1)	0.000583781	0.07 (0.02)	0.00118285	0.1 (0.03)	1.13773e-05
MAP3K8	P1036	6.45513e-05	0.64 (0.14)	1.43414e-05	0.81 (0.07)	0.000148492	0.74 (0.14)	-4.12843e-07
MAP3K9	E17	1.38896e-06	0.09 (0.06)	1.19567e-06	0.06 (0.04)	1.72482e-06	0.08 (0.03)	3.11255e-07
MAPK10	E26	7.53281e-05	0.77 (0.17)	1.22303e-05	0.9 (0.02)	0.000169447	0.8 (0.1)	4.02386e-05
MAPK12	E165	2.51598e-05	0.05 (0.02)	3.40429e-06	0.03 (0.01)	5.78497e-05	0.08 (0.04)	7.13016e-06
MAPK12	P416	1.03601e-05	0.1 (0.06)	8.07589e-06	0.05 (0.03)	1.63979e-05	0.12 (0.08)	-6.5409e-07
MAPK14	P327	2.07593e-05	0.19 (0.07)	2.30958e-05	0.1 (0.05)	1.70855e-05	0.1 (0.07)	2.16373e-05
MAPK4	E273	5.70724e-05	0.82 (0.06)	5.03044e-05	0.87 (0.03)	1.23492e-05	0.9 (0.04)	0.000287446
MAPK9	P1175	4.45682e-07	0.93 (0.01)	4.71398e-07	0.94 (0.02)	6.10664e-07	0.93 (0.03)	-1.21032e-06
			Solid tissues (n=113)		Blood (n=85)		Placenta (n=19)
GENE	CpG	Mean decrease in accuracy	Mean (sd)	Decrease in accuracy	Mean (sd)	Decrease in accuracy	Mean (sd)	Decrease in accuracy
MAS1	P469	7.63046e-06	0.92 (0.03)	1.15266e-06	0.93 (0.02)	3.18391e-06	0.89 (0.03)	6.74027e-05
MAS1	P657	1.0386e-06	0.94 (0.03)	1.32348e-06	0.94 (0.03)	7.48786e-07	0.94 (0.02)	6.7316e-07
MATK	P190	1.60542e-05	0.42 (0.15)	8.27172e-07	0.32 (0.15)	3.55424e-05	0.6 (0.12)	1.78608e-05
MATK	P64	1.3855e-05	0.06 (0.03)	2.41239e-06	0.03 (0.02)	2.24627e-05	0.17 (0.11)	4.01659e-05
MBD2	P233	2.7825e-05	0.65 (0.08)	2.81853e-05	0.67 (0.07)	6.04003e-07	0.79 (0.07)	0.000131684
MC2R	E455	6.3097e-06	0.94 (0.02)	2.15508e-06	0.93 (0.01)	2.98602e-06	0.9 (0.07)	4.6102e-05
MC2R	P1025	0.00114665	0.39 (0.12)	0.00117274	0.73 (0.1)	0.000967874	0.24 (0.09)	0.00186982
MCAM	P169	-1.78844e-08	0.07 (0.04)	3.17038e-07	0.05 (0.02)	-7.15226e-08	0.08 (0.03)	-8.5873e-07
MCAM	P265	3.74812e-06	0.2 (0.07)	1.93903e-06	0.15 (0.05)	4.84633e-06	0.27 (0.09)	9.50921e-06
MCC	E23	1.56165e-06	0.08 (0.03)	8.95421e-07	0.06 (0.02)	2.62831e-06	0.1 (0.05)	9.07937e-07
MCC	P196	2.80917e-05	0.03 (0.01)	5.35813e-05	0.03 (0.02)	1.44993e-06	0.03 (0.04)	1.05404e-06
MCM2	P241	7.26333e-06	0.06 (0.03)	1.38658e-05	0.04 (0.02)	7.68787e-07	0.08 (0.03)	-2.39531e-06
MCM2	P260	3.89661e-06	0.29 (0.1)	1.43711e-06	0.22 (0.09)	4.72498e-06	0.41 (0.12)	1.37597e-05
MCM6	E136	3.78135e-07	0.08 (0.04)	-3.43343e-07	0.06 (0.03)	1.72414e-06	0.12 (0.07)	-1.82587e-06
MDR1	S300	5.60467e-05	0.06 (0.06)	6.10972e-05	0.02 (0.01)	4.44083e-05	0.08 (0.08)	7.91833e-05
MDS1	E45	7.50767e-06	0.06 (0.03)	1.31635e-05	0.06 (0.03)	2.47464e-06	0.07 (0.05)	-2.17857e-06
MEG3	E91	2.49891e-06	0.48 (0.08)	1.18577e-07	0.45 (0.09)	5.15554e-06	0.54 (0.14)	3.99856e-06
MEG3	P235	8.93851e-06	0.87 (0.04)	3.49967e-06	0.84 (0.04)	1.66172e-05	0.77 (0.1)	7.29776e-06
MEST	E150	0.00280942	0.29 (0.13)	0.00136317	0.06 (0.02)	0.00473421	0.5 (0.16)	0.00305158
MEST	P4	0.00388744	0.48 (0.18)	0.00268424	0.06 (0.03)	0.00559419	0.79 (0.11)	0.00378175
MEST	P62	0.00416709	0.37 (0.16)	0.00327612	0.07 (0.03)	0.00544089	0.65 (0.11)	0.00406411
MET	E333	1.13232e-05	0.23 (0.11)	-1.06074e-07	0.33 (0.18)	4.52061e-07	0.09 (0.05)	0.00012953
MFAP4	P10	0.00052746	0.32 (0.08)	0.000253134	0.22 (0.05)	0.000131745	0.69 (0.08)	0.00404245
MFAP4	P197	0.000405905	0.43 (0.14)	0.000132917	0.21 (0.08)	0.000408131	0.88 (0.04)	0.00205807
MGMT	P272	6.50699e-06	0.1 (0.05)	8.96676e-06	0.09 (0.06)	3.46586e-06	0.18 (0.07)	4.50238e-06
MGMT	P281	1.40456e-06	0.05 (0.02)	5.91074e-07	0.04 (0.01)	2.24514e-06	0.06 (0.03)	2.3746e-06
MKRN3	E144	0.000183866	0.93 (0.05)	0.000133297	0.95 (0.02)	3.1774e-05	0.45 (0.25)	0.00113139
MKRN3	P108	0.000174745	0.91 (0.05)	0.000136719	0.92 (0.03)	9.29413e-06	0.49 (0.25)	0.00108609
MLF1	E243	1.09721e-05	0.33 (0.15)	7.27347e-07	0.24 (0.08)	2.53669e-05	0.42 (0.11)	6.77244e-06
MLF1	P97	1.83902e-06	0.24 (0.13)	1.08621e-06	0.2 (0.14)	1.37586e-06	0.42 (0.15)	7.30657e-06
MLH1	P381	8.81123e-06	0.04 (0.01)	1.33989e-05	0.03 (0.03)	3.37609e-06	0.05 (0.02)	6.5873e-06
MLH3	E72	4.43158e-05	0.05 (0.03)	5.74687e-05	0.03 (0.01)	3.63392e-05	0.04 (0.03)	1.72937e-06
MLH3	P25	1.00528e-05	0.14 (0.07)	2.28109e-06	0.09 (0.05)	2.36773e-05	0.15 (0.04)	-2.85887e-06
MLLT3	E93	0.000104772	0.03 (0.01)	0.000139964	0.02 (0)	6.8849e-05	0.03 (0.01)	6.96538e-05
MLLT4	P1400	0.000125855	0.12 (0.06)	2.19304e-05	0.03 (0.01)	0.000289921	0.05 (0.01)	2.28748e-05
MLLT6	P957	3.05537e-06	0.08 (0.04)	4.4836e-06	0.13 (0.09)	1.08671e-06	0.15 (0.06)	2.34524e-06
MME	E29	2.7601e-05	0.16 (0.07)	4.80187e-05	0.1 (0.06)	4.12716e-06	0.1 (0.07)	1.17509e-05
MME	P388	7.36788e-06	0.12 (0.09)	3.36546e-06	0.06 (0.03)	1.23325e-05	0.07 (0.05)	9.66371e-06
MMP1	P397	6.72629e-07	0.97 (0.02)	2.59402e-07	0.97 (0.01)	1.31318e-06	0.98 (0.01)	4.42857e-07
MMP1	P460	3.38374e-06	0.97 (0.01)	-2.83328e-07	0.97 (0.01)	8.48361e-06	0.97 (0.01)	1.52056e-06
MMP10	E136	3.48599e-06	0.55 (0.1)	6.1131e-06	0.63 (0.1)	-1.26628e-06	0.44 (0.17)	9.01258e-06
MMP14	P13	0.000135252	0.46 (0.16)	1.03495e-05	0.52 (0.09)	0.000222739	0.21 (0.07)	0.000509827
MMP14	P208	7.35539e-06	0.32 (0.12)	1.89062e-06	0.34 (0.11)	6.93956e-06	0.23 (0.1)	4.38615e-05
MMP19	E274	5.71488e-05	0.89 (0.04)	1.61338e-06	0.92 (0.03)	7.05544e-05	0.77 (0.12)	0.000338558
MMP19	P306	0.00241468	0.84 (0.04)	0.00164218	0.89 (0.03)	8.84818e-05	0.52 (0.11)	0.0177892
MMP2	E21	5.76644e-05	0.1 (0.04)	1.48666e-05	0.04 (0.02)	0.000128703	0.09 (0.05)	1.35794e-06
MMP2	P197	0.00141604	0.12 (0.07)	0.000790121	0.03 (0.01)	0.00241632	0.16 (0.09)	0.000823376
MMP2	P303	0.00189004	0.21 (0.17)	0.00116194	0.03 (0.01)	0.00331485	0.07 (0.04)	1.38474e-05
MMP3	P16	3.69957e-06	0.88 (0.08)	4.13958e-06	0.92 (0.03)	2.71468e-06	0.89 (0.02)	6.77302e-06
MMP3	P55	1.11734e-05	0.86 (0.04)	2.88574e-06	0.9 (0.03)	1.15881e-05	0.83 (0.05)	5.56647e-05
MMP7	E59	3.28692e-05	0.32 (0.1)	3.71435e-06	0.18 (0.06)	6.04804e-05	0.52 (0.12)	8.49148e-05
MMP7	P613	2.31902e-06	0.85 (0.03)	2.26939e-06	0.83 (0.03)	3.51713e-06	0.84 (0.05)	-2.55166e-06
MMP8	E89	0.000406008	0.91 (0.04)	0.000160955	0.78 (0.06)	0.000772566	0.94 (0.04)	0.000253845
MMP9	E88	2.64363e-05	0.9 (0.03)	2.45414e-05	0.87 (0.04)	2.86201e-05	0.85 (0.07)	2.91574e-05
MMP9	P189	0.00110517	0.66 (0.12)	0.000946365	0.25 (0.11)	0.00133701	0.77 (0.09)	0.00111437
MMP9	P237	2.47954e-05	0.12 (0.05)	3.30541e-06	0.06 (0.02)	5.97568e-05	0.17 (0.11)	3.13975e-06
MOS	E60	4.99929e-06	0.24 (0.15)	1.27052e-06	0.14 (0.08)	9.55323e-06	0.28 (0.12)	4.04848e-06
MOS	P27	7.22094e-06	0.1 (0.05)	1.0369e-05	0.07 (0.05)	1.47093e-06	0.21 (0.11)	1.27559e-05
MOS	P746	0.00059196	0.76 (0.07)	0.000391386	0.81 (0.07)	2.13103e-05	0.33 (0.14)	0.00423306
MPL	P62	0.00691732	0.86 (0.05)	0.00532445	0.44 (0.11)	0.0094843	0.92 (0.04)	0.00560767
MPL	P657	3.80919e-06	0.63 (0.11)	5.6698e-06	0.68 (0.07)	-6.11338e-09	0.76 (0.08)	8.76558e-06
MPO	E302	0.000227389	0.87 (0.05)	7.51446e-05	0.75 (0.06)	0.000452403	0.89 (0.05)	0.000145796
MPO	P883	0.000118685	0.38 (0.16)	7.74883e-05	0.15 (0.08)	0.000196755	0.3 (0.09)	2.70449e-05
MSH2	P1008	1.12577e-06	0.68 (0.13)	1.3271e-06	0.76 (0.07)	1.19153e-06	0.72 (0.06)	-9.6746e-07
MSH3	E3	6.64584e-06	0.88 (0.1)	7.57343e-07	0.85 (0.14)	1.64657e-05	0.84 (0.17)	-1.29683e-06
MSH3	P13	3.3712e-08	0.72 (0.11)	3.59344e-08	0.73 (0.13)	1.23443e-07	0.67 (0.19)	-6.03896e-07
MST1R	E42	5.19903e-05	0.59 (0.17)	1.14044e-05	0.79 (0.06)	0.000112708	0.76 (0.06)	2.12975e-05
MST1R	P392	6.11552e-06	0.17 (0.2)	6.98708e-06	0.06 (0.04)	6.66838e-06	0.13 (0.07)	-1.01118e-06
MST1R	P87	0.000433678	0.57 (0.14)	0.000200484	0.84 (0.05)	0.000680224	0.44 (0.08)	0.000736751
MT1A	E13	4.12974e-06	0.15 (0.09)	4.42725e-06	0.09 (0.04)	4.88133e-06	0.13 (0.07)	-2.01905e-06
MT1A	P49	2.52878e-05	0.05 (0.06)	1.33097e-05	0.02 (0.01)	3.79235e-05	0.03 (0.01)	4.34525e-05
MT1A	P600	0.0122851	0.58 (0.13)	0.0102508	0.09 (0.03)	0.0162488	0.42 (0.09)	0.00783138
MTA1	P478	4.28278e-07	0.12 (0.06)	9.34913e-07	0.11 (0.06)	-3.84277e-07	0.15 (0.07)	1.25476e-06
MUC1	E18	6.31434e-05	0.63 (0.12)	1.04889e-05	0.47 (0.09)	0.000149015	0.62 (0.12)	7.30382e-06
MUC1	P191	3.50165e-05	0.29 (0.13)	9.74196e-06	0.11 (0.06)	7.56508e-05	0.24 (0.12)	1.99444e-06
MUSK	P308	4.51971e-06	0.86 (0.05)	1.49089e-07	0.87 (0.05)	6.25124e-07	0.82 (0.09)	4.88099e-05
MXI1	P1269	8.68171e-05	0.71 (0.08)	0.000107098	0.64 (0.1)	-2.17562e-07	0.49 (0.12)	0.000346484
MXI1	P75	2.84371e-06	0.1 (0.05)	3.22674e-06	0.07 (0.04)	2.82204e-06	0.15 (0.1)	1.32698e-06
MYB	P673	2.9245e-06	0.1 (0.03)	3.28009e-06	0.08 (0.03)	1.91889e-06	0.12 (0.03)	5.29149e-06
MYBL2	P211	4.79615e-06	0.05 (0.03)	7.59078e-06	0.03 (0.02)	1.50369e-06	0.06 (0.04)	3.96667e-06
MYBL2	P354	1.66661e-05	0.17 (0.07)	6.03294e-06	0.08 (0.04)	3.08845e-05	0.24 (0.1)	1.3847e-05
MYCL1	P502	-5.77039e-07	0.08 (0.04)	2.09315e-09	0.08 (0.05)	-1.33114e-06	0.08 (0.04)	-7.30159e-07
MYCN	E77	9.81377e-06	0.07 (0.02)	-3.9768e-07	0.04 (0.01)	2.08556e-05	0.08 (0.03)	1.97565e-05
MYCN	P464	4.35897e-05	0.03 (0.02)	5.6488e-05	0.02 (0)	3.57953e-05	0.03 (0.01)	-1.65945e-09
MYH11	P22	1.3595e-06	0.1 (0.09)	5.68134e-07	0.07 (0.04)	2.80568e-06	0.17 (0.09)	-3.57792e-07
MYH11	P236	2.3506e-06	0.06 (0.03)	2.26242e-06	0.03 (0.02)	3.0347e-06	0.06 (0.04)	-1.14531e-06
MYLK	E132	1.09389e-05	0.29 (0.12)	1.41294e-06	0.21 (0.08)	2.57357e-05	0.32 (0.08)	3.9381e-06
MYLK	P469	0.000353671	0.25 (0.08)	0.000463153	0.11 (0.05)	0.000176044	0.09 (0.04)	0.000524591
MYOD1	E156	1.21782e-05	0.1 (0.08)	2.04852e-05	0.08 (0.05)	4.5246e-06	0.07 (0.05)	-2.40556e-06
MYOD1	P50	1.91716e-06	0.15 (0.07)	8.07125e-07	0.12 (0.04)	2.83184e-06	0.1 (0.07)	4.52561e-06
NAT2	P11	0.00316981	0.75 (0.1)	0.00194235	0.92 (0.02)	0.00479515	0.66 (0.09)	0.0035947
NBL1	E205	7.74171e-05	0.78 (0.12)	1.6647e-05	0.89 (0.05)	0.000102216	0.49 (0.17)	0.000338987
NBL1	P24	0.00013717	0.64 (0.14)	3.90755e-05	0.83 (0.09)	0.000141502	0.23 (0.1)	0.000772788
NCL	P1102	1.3063e-05	0.93 (0.03)	1.2969e-05	0.94 (0.03)	6.78343e-06	0.9 (0.03)	4.52505e-05
NCL	P840	7.43906e-07	0.08 (0.03)	7.59703e-07	0.06 (0.03)	2.72758e-07	0.12 (0.06)	3.03254e-06
NDN	E131	8.19899e-05	0.78 (0.05)	0.000124752	0.7 (0.1)	1.03748e-05	0.64 (0.1)	0.00014844
NDN	P1110	0.000110746	0.91 (0.03)	6.80458e-05	0.93 (0.02)	6.09554e-06	0.74 (0.12)	0.00077421
NEFL	E23	9.49197e-06	0.3 (0.19)	4.13217e-06	0.17 (0.15)	7.40638e-06	0.7 (0.16)	5.05273e-05
NEFL	P209	4.52622e-05	0.2 (0.13)	4.56913e-06	0.1 (0.05)	8.21881e-05	0.6 (0.17)	0.000130673
NEO1	P1067	4.10125e-06	0.16 (0.09)	1.25986e-06	0.09 (0.06)	3.43305e-06	0.06 (0.06)	2.03639e-05
			Solid tissues (n=113)		Blood (n=85)		Placenta (n=19)
GENE	CpG	Mean decrease in accuracy	Mean (sd)	Decrease in accuracy	Mean (sd)	Decrease in accuracy	Mean (sd)	Decrease in accuracy
NES	P239	0.000396296	0.18 (0.08)	0.000282653	0.23 (0.1)	-1.89617e-06	0.59 (0.12)	0.00286491
NEU1	P745	4.34417e-06	0.13 (0.17)	2.76426e-06	0.1 (0.06)	6.40696e-06	0.2 (0.09)	5.32381e-06
NFKB1	P336	-1.06672e-07	0.1 (0.09)	4.09091e-08	0.09 (0.11)	-1.93119e-07	0.15 (0.17)	-3.69841e-07
NFKB1	P496	0.000417452	0.18 (0.07)	0.00064423	0.53 (0.21)	0.000113756	0.51 (0.17)	0.000438443
NFKB2	P709	5.06721e-06	0.07 (0.03)	8.12968e-06	0.08 (0.05)	1.09986e-06	0.11 (0.04)	5.20317e-06
NGFB	E353	4.48135e-06	0.17 (0.09)	1.15343e-06	0.12 (0.07)	7.51465e-06	0.3 (0.13)	8.03413e-06
NGFB	P13	2.85143e-05	0.24 (0.07)	1.4413e-06	0.17 (0.03)	7.08977e-05	0.24 (0.08)	7.14863e-07
NGFR	E328	1.48586e-06	0.12 (0.05)	5.30062e-07	0.1 (0.06)	3.00255e-06	0.19 (0.09)	1.39921e-06
NGFR	P355	0.00182906	0.34 (0.13)	0.000791611	0.1 (0.04)	0.00314046	0.42 (0.1)	0.00234861
NID1	P677	0.000161512	0.9 (0.07)	3.99794e-05	0.95 (0.02)	9.49707e-05	0.57 (0.16)	0.00125169
NID1	P714	4.53136e-06	0.93 (0.03)	2.53813e-06	0.94 (0.02)	2.0589e-06	0.91 (0.03)	2.79834e-05
NKX3-1	P146	2.65108e-06	0.06 (0.02)	3.14758e-06	0.05 (0.02)	2.05589e-06	0.09 (0.05)	2.36667e-06
NKX3-1	P871	1.53866e-05	0.96 (0.02)	8.93514e-06	0.94 (0.02)	1.41882e-05	0.93 (0.03)	6.54492e-05
NNAT	P544	3.89841e-06	0.9 (0.03)	5.04482e-06	0.84 (0.05)	3.55691e-06	0.91 (0.04)	-6.05556e-07
NOS2A	E117	1.77869e-05	0.91 (0.05)	2.3694e-07	0.92 (0.02)	8.22942e-06	0.84 (0.04)	0.000173506
NOS2A	P288	1.56557e-05	0.74 (0.11)	7.55765e-06	0.86 (0.05)	3.1251e-05	0.82 (0.08)	-5.65563e-06
NOS3	P38	3.38354e-05	0.82 (0.09)	2.23233e-06	0.88 (0.06)	1.10414e-05	0.6 (0.07)	0.000315626
NOTCH1	E452	1.33362e-06	0.05 (0.02)	2.22267e-06	0.05 (0.03)	8.52956e-07	0.05 (0.03)	-1.87792e-06
NOTCH1	P1198	0.000565621	0.08 (0.03)	0.00060623	0.14 (0.09)	7.10687e-06	0.38 (0.14)	0.0027952
NOTCH2	P312	0.0001488	0.03 (0.01)	9.40311e-05	0.01 (0)	0.000230753	0.03 (0.01)	0.000115491
NOTCH3	E403	2.59441e-06	0.09 (0.04)	2.38345e-06	0.08 (0.04)	4.72357e-07	0.04 (0.03)	1.22002e-05
NOTCH3	P198	4.15394e-06	0.43 (0.15)	-6.60487e-08	0.31 (0.11)	9.3574e-06	0.56 (0.11)	5.7039e-06
NOTCH4	E4	8.19059e-05	0.44 (0.19)	9.58509e-06	0.17 (0.07)	0.000181908	0.7 (0.21)	7.33151e-05
NOTCH4	P938	4.04315e-05	0.83 (0.05)	9.4845e-06	0.84 (0.04)	1.12165e-05	0.62 (0.14)	0.000365074
NPR2	P1093	3.21056e-05	0.81 (0.11)	1.47996e-05	0.9 (0.03)	5.76066e-05	0.9 (0.09)	2.11124e-05
NPR2	P618	3.09152e-05	0.12 (0.07)	1.47955e-06	0.17 (0.07)	2.99971e-05	0.06 (0.02)	0.000227943
NPY	E31	0.000123584	0.4 (0.15)	4.1652e-05	0.3 (0.12)	3.65944e-05	0.78 (0.06)	0.00101483
NPY	P295	0.000443422	0.19 (0.18)	0.000230001	0.08 (0.05)	5.50773e-05	0.93 (0.03)	0.00360303
NPY	P91	0.000190128	0.06 (0.05)	8.44267e-05	0.04 (0.02)	1.65185e-05	0.43 (0.1)	0.00162691
NQO1	E74	0.000148725	0.05 (0.01)	0.0002583	0.03 (0.01)	3.76457e-05	0.05 (0.01)	3.58102e-06
NQO1	P345	0.00126007	0.05 (0.02)	0.000872031	0.04 (0.02)	2.48726e-05	0.7 (0.12)	0.00942389
NR2F6	E375	2.65832e-06	0.09 (0.02)	3.25476e-06	0.07 (0.02)	2.10726e-06	0.09 (0.04)	9.44444e-07
NRAS	P103	2.79904e-06	0.04 (0.01)	2.62133e-06	0.04 (0.03)	3.93439e-08	0.07 (0.03)	1.64945e-05
NRAS	P12	8.87969e-07	0.04 (0.02)	1.32452e-06	0.06 (0.05)	5.34926e-07	0.04 (0.02)	-5.53968e-07
NRG1	E74	1.73037e-06	0.07 (0.03)	7.37554e-07	0.06 (0.02)	3.40446e-06	0.13 (0.09)	7.24603e-07
NRG1	P558	0.000254346	0.07 (0.04)	0.000206446	0.07 (0.03)	6.80372e-06	0.46 (0.19)	0.00155981
NTRK1	E74	2.07355e-06	0.58 (0.35)	3.26024e-06	0.6 (0.37)	6.33009e-08	0.66 (0.36)	5.15714e-06
NTRK2	P10	8.17941e-06	0.06 (0.03)	6.19961e-06	0.04 (0.02)	7.39221e-06	0.04 (0.01)	2.47589e-05
NTRK2	P395	1.39695e-05	0.06 (0.08)	4.50833e-06	0.03 (0.01)	3.01258e-05	0.05 (0.05)	-1.30483e-06
NTRK3	E131	4.34671e-05	0.03 (0.02)	5.66186e-05	0.02 (0.01)	3.55906e-05	0.05 (0.03)	6.05078e-06
NTRK3	P636	4.00311e-06	0.07 (0.05)	6.94952e-06	0.05 (0.03)	1.68498e-06	0.08 (0.05)	-2.94127e-06
NTRK3	P752	4.25127e-06	0.05 (0.03)	4.03297e-06	0.04 (0.02)	5.28293e-06	0.11 (0.08)	9.08874e-07
NTSR1	E109	2.23776e-06	0.08 (0.03)	3.73647e-06	0.06 (0.03)	6.17658e-07	0.13 (0.09)	6.13636e-07
NTSR1	P318	5.17836e-05	0.09 (0.07)	1.0844e-05	0.04 (0.02)	5.26968e-05	0.35 (0.14)	0.000287371
OAT	P465	6.17981e-06	0.27 (0.12)	9.79405e-07	0.18 (0.08)	1.2225e-05	0.4 (0.12)	8.64235e-06
ODC1	P424	3.37215e-06	0.03 (0.01)	5.62719e-06	0.04 (0.03)	1.47152e-06	0.04 (0.03)	-1.56515e-06
OGG1	E400	0.000171184	0.32 (0.15)	1.67663e-05	0.55 (0.09)	0.000292966	0.07 (0.05)	0.0005761
ONECUT2	E96	1.27848e-05	0.13 (0.07)	3.95454e-06	0.08 (0.04)	2.69803e-05	0.45 (0.33)	5.24127e-06
ONECUT2	P315	6.28691e-06	0.06 (0.02)	9.57339e-06	0.04 (0.02)	1.78882e-06	0.21 (0.19)	6.83016e-06
OPCML	E219	0.000740231	0.1 (0.06)	0.000433985	0.06 (0.02)	5.6442e-05	0.56 (0.14)	0.00580989
OPCML	P71	4.01044e-06	0.21 (0.08)	1.42128e-06	0.18 (0.07)	3.99847e-06	0.38 (0.13)	1.866e-05
OSM	P188	0.0122615	0.87 (0.07)	0.00989409	0.03 (0.01)	0.0165612	0.95 (0.02)	0.00830442
OSM	P34	0.0122519	0.74 (0.11)	0.00990038	0.07 (0.04)	0.0165311	0.87 (0.07)	0.00829884
p16	S188	3.50341e-06	0.04 (0.02)	2.79975e-06	0.03 (0.01)	5.11427e-06	0.04 (0.02)	-5.33333e-07
p16	S85	2.57615e-08	0.66 (0.13)	2.33053e-08	0.56 (0.15)	-1.57113e-10	0.72 (0.12)	-6.55567e-08
P2RX7	E323	0.00040963	0.14 (0.06)	0.000287029	0.12 (0.06)	1.82277e-05	0.57 (0.16)	0.00286397
P2RX7	P119	1.02415e-06	0.15 (0.06)	1.06656e-06	0.18 (0.06)	2.40709e-06	0.16 (0.07)	-6.04632e-06
P2RX7	P597	0.000829373	0.9 (0.06)	0.000454739	0.96 (0.02)	5.3621e-05	0.49 (0.12)	0.00669344
PADI4	E24	0.00882627	0.87 (0.07)	0.00642797	0.35 (0.12)	0.0127404	0.94 (0.02)	0.00642824
PADI4	P1011	4.13159e-05	0.67 (0.1)	1.07649e-05	0.78 (0.03)	8.96968e-05	0.8 (0.05)	1.05611e-05
PADI4	P1158	0.000520476	0.54 (0.14)	0.000286462	0.78 (0.04)	0.00087576	0.82 (0.09)	0.000341645
PALM2-AKAP2	P183	2.41738e-08	0.09 (0.03)	-2.94271e-07	0.07 (0.02)	5.69954e-07	0.1 (0.03)	-8.34199e-07
PALM2-AKAP2	P420	1.96834e-06	0.11 (0.06)	9.03077e-07	0.08 (0.03)	4.19186e-06	0.1 (0.05)	-1.73333e-06
PARP1	P610	0.000347987	0.81 (0.06)	0.000191325	0.83 (0.08)	4.62919e-06	0.52 (0.1)	0.00284151
PAX6	E129	9.64403e-06	0.13 (0.08)	2.20291e-06	0.07 (0.04)	2.05714e-05	0.2 (0.1)	5.73737e-06
PAX6	P1121	0.000758609	0.06 (0.04)	0.000473811	0.04 (0.01)	7.68298e-05	0.54 (0.12)	0.00567191
PAX6	P50	7.87705e-06	0.08 (0.08)	8.40778e-07	0.05 (0.02)	1.92301e-05	0.23 (0.21)	-1.11566e-06
PCDH1	E22	1.61701e-05	0.05 (0.02)	-3.58164e-07	0.03 (0.01)	3.17961e-05	0.08 (0.04)	4.44407e-05
PCDH1	P264	2.33584e-06	0.17 (0.12)	5.37147e-07	0.13 (0.09)	5.38899e-06	0.23 (0.14)	1.66667e-07
PCGF4	P760	2.04458e-06	0.16 (0.08)	1.05705e-06	0.15 (0.09)	8.52518e-08	0.28 (0.08)	1.69735e-05
PCGF4	P92	3.79185e-06	0.1 (0.04)	7.10063e-06	0.12 (0.09)	6.61191e-07	0.11 (0.08)	-1.61111e-07
PDE1B	E141	1.84728e-06	0.12 (0.04)	3.82374e-07	0.12 (0.03)	3.89613e-06	0.14 (0.05)	8.84199e-07
PDE1B	P263	5.49261e-06	0.06 (0.03)	2.78091e-06	0.03 (0.02)	1.06015e-05	0.05 (0.02)	-1.8197e-06
PDGFA	P78	1.59321e-06	0.22 (0.05)	-8.20715e-07	0.18 (0.05)	4.53312e-06	0.27 (0.07)	1.96508e-06
PDGFA	P841	3.54989e-05	0.03 (0.01)	5.86819e-05	0.02 (0.01)	1.32372e-05	0.04 (0.02)	2.73333e-06
PDGFB	E25	-2.30211e-07	0.31 (0.1)	-3.73453e-08	0.27 (0.1)	1.65682e-07	0.34 (0.12)	-3.43175e-06
PDGFB	P719	4.0098e-05	0.78 (0.06)	9.2956e-06	0.74 (0.07)	5.93349e-05	0.88 (0.05)	0.000139257
PDGFRA	E125	2.67708e-05	0.48 (0.14)	6.7254e-06	0.32 (0.1)	5.81256e-05	0.68 (0.2)	1.01649e-05
PDGFRA	P1429	3.20611e-05	0.08 (0.08)	3.96812e-05	0.04 (0.02)	2.12372e-05	0.28 (0.19)	3.38377e-05
PDGFRB	E195	0.000669554	0.16 (0.11)	0.000379118	0.17 (0.08)	2.32742e-05	0.82 (0.07)	0.00556102
PDGFRB	P273	0.000649498	0.47 (0.14)	0.000370192	0.36 (0.16)	3.95923e-05	0.85 (0.04)	0.00527467
PDGFRB	P343	0.000667791	0.04 (0.07)	0.000394152	0.02 (0.01)	3.99757e-05	0.7 (0.12)	0.00535684
PECAM1	E32	0.0040398	0.73 (0.11)	0.00301761	0.29 (0.09)	0.00544419	0.83 (0.07)	0.00421305
PECAM1	P135	0.00979051	0.77 (0.08)	0.00800759	0.31 (0.09)	0.0129579	0.86 (0.05)	0.00718632
PEG10	P978	0.000182512	0.19 (0.08)	7.45231e-05	0.14 (0.04)	5.13317e-05	0.54 (0.1)	0.00145538
PEG3	E496	1.62809e-05	0.44 (0.12)	4.59368e-06	0.51 (0.05)	3.59788e-05	0.53 (0.08)	3.88095e-07
PENK	E26	1.58403e-06	0.26 (0.1)	-1.87125e-07	0.24 (0.08)	3.73361e-06	0.32 (0.08)	2.28492e-06
PENK	P447	6.56782e-06	0.14 (0.11)	3.5977e-07	0.1 (0.05)	1.52539e-05	0.34 (0.19)	5.47489e-06
PGF	E33	4.4225e-05	0.05 (0.01)	6.82405e-05	0.04 (0.01)	2.15229e-05	0.06 (0.01)	8.15007e-06
PGF	P320	3.2027e-05	0.24 (0.1)	1.35303e-06	0.36 (0.1)	4.69302e-05	0.11 (0.05)	0.000146745
PGR	E183	0.00252471	0.89 (0.03)	0.00176276	0.88 (0.03)	3.9532e-05	0.45 (0.14)	0.0186503
PGR	P456	5.5707e-05	0.93 (0.02)	7.45264e-05	0.91 (0.03)	1.8622e-06	0.83 (0.09)	0.000182818
PGR	P790	0.00115321	0.73 (0.08)	0.00082717	0.72 (0.08)	1.91564e-05	0.39 (0.08)	0.00803242
PHLDA2	E159	8.64921e-06	0.1 (0.03)	-3.5838e-07	0.07 (0.02)	1.87948e-05	0.16 (0.05)	1.4375e-05
PHLDA2	P622	-4.59497e-08	0.31 (0.08)	3.97221e-07	0.36 (0.13)	-5.5979e-07	0.4 (0.16)	-4.23077e-08
PI3	E107	0.000137386	0.82 (0.16)	2.00585e-05	0.8 (0.14)	7.66747e-06	0.27 (0.09)	0.00153493
PI3	P1394	0.000645425	0.78 (0.07)	0.000415531	0.84 (0.08)	1.33877e-05	0.29 (0.13)	0.00480395
PI3	P274	0.000114289	0.92 (0.04)	7.99365e-05	0.85 (0.05)	0.000126594	0.81 (0.06)	0.000277589
PIK3R1	P307	3.05735e-05	0.88 (0.07)	3.97714e-06	0.88 (0.03)	7.01376e-05	0.91 (0.07)	8.31325e-06
PITX2	E24	3.03958e-06	0.28 (0.13)	1.22787e-06	0.18 (0.09)	6.35466e-06	0.27 (0.21)	-2.04834e-06
			Solid tissues (n=113)		Blood (n=85)		Placenta (n=19)
GENE	CpG	Mean decrease in accuracy	Mean (sd)	Decrease in accuracy	Mean (sd)	Decrease in accuracy	Mean (sd)	Decrease in accuracy
PITX2	P183	7.20838e-07	0.21 (0.07)	1.63293e-07	0.16 (0.07)	4.98379e-07	0.27 (0.09)	4.78499e-06
PKD2	P287	8.43379e-06	0.07 (0.03)	1.50336e-05	0.09 (0.05)	2.30532e-06	0.08 (0.04)	-1.86587e-06
PKD2	P336	2.47005e-06	0.09 (0.03)	7.26816e-07	0.08 (0.02)	6.07064e-06	0.08 (0.02)	-2.08742e-06
PLA2G2A	E268	-2.703e-07	0.8 (0.07)	2.28425e-07	0.78 (0.05)	-8.06699e-08	0.81 (0.06)	-3.87309e-06
PLA2G2A	P528	2.72267e-05	0.81 (0.07)	6.16998e-06	0.8 (0.07)	4.92196e-06	0.62 (0.13)	0.000266963
PLAGL1	E68	3.5738e-05	0.82 (0.05)	1.3003e-05	0.74 (0.06)	7.19536e-05	0.85 (0.05)	9.98455e-06
PLAGL1	P236	1.96727e-06	0.75 (0.05)	7.51006e-07	0.7 (0.06)	3.14405e-06	0.79 (0.05)	4.75967e-06
PLAGL1	P334	2.50801e-06	0.78 (0.07)	1.29009e-06	0.75 (0.11)	5.6121e-07	0.77 (0.04)	1.97668e-05
PLAT	E158	0.000421719	0.41 (0.16)	0.000314866	0.8 (0.1)	0.000459379	0.27 (0.11)	0.000919608
PLAT	P80	1.31727e-05	0.16 (0.08)	1.9719e-05	0.34 (0.12)	7.92999e-06	0.26 (0.11)	5.91819e-07
PLAU	P11	1.84002e-05	0.12 (0.05)	1.59541e-05	0.1 (0.05)	5.25825e-06	0.24 (0.07)	8.85232e-05
PLAU	P176	5.45319e-07	0.11 (0.05)	5.72752e-07	0.08 (0.06)	1.40925e-07	0.15 (0.1)	2.10563e-06
PLAUR	E123	2.29118e-06	0.08 (0.03)	6.71273e-07	0.07 (0.02)	5.47355e-06	0.09 (0.03)	-2.34603e-06
PLAUR	P82	4.87383e-06	0.04 (0.02)	8.12259e-06	0.03 (0.02)	1.28764e-06	0.03 (0.01)	1.97388e-06
PLG	E406	5.91318e-06	0.93 (0.04)	1.568e-06	0.95 (0.01)	6.08259e-06	0.92 (0.03)	3.34373e-05
PLG	P370	2.89495e-06	0.9 (0.02)	-1.18535e-07	0.92 (0.01)	4.85377e-06	0.89 (0.03)	1.39295e-05
PLSCR3	P751	1.65879e-06	0.36 (0.1)	1.89871e-06	0.3 (0.08)	8.44467e-07	0.33 (0.1)	3.33966e-06
PLXDC1	E71	0.000407092	0.12 (0.04)	0.00026157	0.09 (0.03)	4.21278e-05	0.49 (0.14)	0.00288898
PLXDC1	P236	0.00128133	0.05 (0.02)	0.000885639	0.04 (0.01)	4.41753e-05	0.72 (0.14)	0.00946872
PLXDC2	E337	2.37395e-05	0.05 (0.04)	3.81265e-05	0.03 (0.01)	6.21319e-06	0.03 (0.01)	1.71947e-05
PLXDC2	P914	1.68012e-06	0.12 (0.07)	8.2254e-07	0.07 (0.03)	3.20877e-06	0.11 (0.04)	-1.86508e-07
PMP22	P1254	7.69704e-07	0.92 (0.02)	2.00019e-06	0.92 (0.02)	-1.91732e-07	0.91 (0.02)	-2.00014e-06
PMP22	P975	0.000410508	0.86 (0.05)	0.00025837	0.89 (0.03)	1.33107e-05	0.95 (0.01)	0.00309984
PODXL	P1341	2.9583e-05	0.1 (0.07)	3.31142e-06	0.05 (0.02)	6.71477e-05	0.15 (0.07)	1.40877e-05
POMC	E254	4.61538e-07	0.07 (0.03)	5.71717e-07	0.07 (0.04)	7.07149e-07	0.1 (0.04)	-2.77778e-07
POMC	P400	6.97677e-05	0.38 (0.16)	3.36892e-05	0.11 (0.07)	0.000135072	0.28 (0.17)	-1.05823e-06
POMC	P53	0.000410386	0.04 (0.01)	0.000645432	0.03 (0.01)	0.000129044	0.06 (0.03)	0.000314052
PPARD	P846	2.85555e-06	0.14 (0.08)	5.64463e-07	0.22 (0.11)	1.56583e-06	0.12 (0.07)	2.10143e-05
PPARG	E178	1.50805e-05	0.04 (0.01)	2.57257e-05	0.03 (0.01)	4.931e-06	0.07 (0.07)	-6.55189e-07
PPARG	P693	6.42735e-05	0.76 (0.11)	2.77437e-05	0.65 (0.12)	1.26233e-06	0.46 (0.1)	0.000583878
PPAT	E170	4.42169e-06	0.52 (0.08)	3.09246e-06	0.42 (0.1)	4.39538e-06	0.62 (0.08)	1.2332e-05
PPP2R1B	P268	2.93557e-06	0.04 (0.02)	4.65618e-06	0.05 (0.03)	1.24763e-06	0.06 (0.04)	1.46183e-06
PRDM2	P1340	0.000108223	0.92 (0.02)	5.96641e-05	0.92 (0.03)	2.26769e-06	0.83 (0.06)	0.000863342
PRKAR1A	P337	3.62626e-07	0.05 (0.02)	1.02338e-06	0.05 (0.04)	1.34491e-07	0.05 (0.02)	-2.42698e-06
PRKCDBP	E206	1.83996e-05	0.07 (0.07)	5.09491e-06	0.04 (0.02)	1.93351e-05	0.31 (0.23)	9.77361e-05
PRKCDBP	P352	6.57511e-06	0.27 (0.17)	2.4028e-06	0.16 (0.07)	9.41993e-06	0.51 (0.18)	1.73847e-05
PROK2	E0	3.21389e-06	0.04 (0.02)	2.25409e-06	0.03 (0.01)	4.74322e-06	0.06 (0.04)	1.41667e-06
PROK2	P390	0.000615514	0.04 (0.04)	0.000652756	0.01 (0)	0.000623871	0.05 (0.03)	0.000438281
PROM1	P44	1.8999e-06	0.92 (0.03)	1.12607e-06	0.92 (0.02)	4.127e-07	0.94 (0.01)	1.35507e-05
PRSS1	E45	4.48767e-05	0.8 (0.09)	3.18546e-06	0.88 (0.03)	5.65131e-05	0.69 (0.07)	0.000244555
PRSS1	P1249	0.000381265	0.76 (0.05)	0.000245335	0.76 (0.07)	1.74148e-06	0.54 (0.09)	0.00294471
PRSS8	E134	0.000482847	0.84 (0.12)	0.000165563	0.96 (0.02)	0.000814425	0.62 (0.14)	0.000964159
PSCA	E359	0.00322715	0.63 (0.11)	0.00289127	0.2 (0.09)	0.00375166	0.68 (0.11)	0.00317122
PSCA	P135	6.53362e-05	0.73 (0.09)	3.81263e-06	0.82 (0.05)	5.39108e-05	0.5 (0.09)	0.000497442
PSIP1	P163	5.99491e-06	0.08 (0.05)	2.08888e-06	0.06 (0.04)	1.15118e-05	0.15 (0.08)	6.47157e-06
PTCH	E42	0.000117509	0.04 (0.01)	5.11237e-05	0.02 (0.01)	0.000224953	0.05 (0.01)	3.81584e-05
PTCH2	E173	0.000102289	0.6 (0.17)	5.48631e-06	0.49 (0.09)	0.000246248	0.74 (0.13)	4.32117e-05
PTCH2	P37	3.85465e-05	0.07 (0.03)	5.12926e-05	0.05 (0.02)	3.02014e-05	0.07 (0.02)	-7.22944e-08
PTCH2	P568	0.000129668	0.34 (0.11)	1.8746e-05	0.18 (0.05)	0.000304835	0.39 (0.12)	2.25207e-05
PTEN	P438	3.52868e-06	0.03 (0.02)	3.5533e-06	0.02 (0.01)	1.85445e-06	0.04 (0.01)	1.11113e-05
PTGS1	E80	5.99685e-06	0.13 (0.05)	7.77753e-06	0.14 (0.08)	9.70014e-07	0.25 (0.09)	1.84338e-05
PTGS1	P2	3.25239e-06	0.07 (0.04)	1.0088e-06	0.05 (0.03)	6.94465e-06	0.12 (0.08)	-1.11111e-07
PTGS2	P308	5.7152e-05	0.1 (0.04)	0.000101697	0.05 (0.03)	8.98353e-06	0.07 (0.06)	1.26391e-05
PTGS2	P524	1.215e-05	0.1 (0.05)	7.47632e-06	0.08 (0.04)	1.38503e-06	0.29 (0.15)	8.23489e-05
PTHLH	E251	0.0055343	0.58 (0.11)	0.00574734	0.21 (0.06)	0.00632846	0.5 (0.11)	0.00118651
PTHLH	P15	0.00385156	0.84 (0.06)	0.00339148	0.4 (0.16)	0.00463261	0.87 (0.04)	0.00338326
PTHLH	P757	0.000261414	0.84 (0.04)	0.000421876	0.61 (0.16)	0.00010245	0.83 (0.12)	3.16294e-05
PTHR1	E36	4.24551e-06	0.93 (0.03)	2.07988e-06	0.94 (0.02)	4.74127e-06	0.95 (0.01)	1.46034e-05
PTHR1	P170	7.83818e-07	0.92 (0.06)	1.39117e-06	0.94 (0.01)	4.82474e-07	0.94 (0.03)	-1.55411e-06
PTHR1	P258	3.32638e-05	0.65 (0.12)	3.55104e-05	0.77 (0.08)	9.47837e-06	0.86 (0.05)	0.00012915
PTK2	P735	9.70271e-06	0.06 (0.02)	1.21167e-05	0.04 (0.01)	3.45642e-06	0.07 (0.02)	2.46046e-05
PTK2B	P673	-2.99685e-07	0.04 (0.01)	-1.71936e-08	0.04 (0.01)	-5.11392e-07	0.04 (0.02)	-9.16667e-07
PTK6	E50	1.60801e-05	0.45 (0.17)	8.51136e-06	0.57 (0.09)	2.88391e-05	0.65 (0.11)	6.14048e-06
PTK7	E317	9.11878e-07	0.65 (0.15)	-1.19454e-07	0.63 (0.14)	1.72682e-06	0.65 (0.07)	2.98759e-06
PTPN6	E171	0.00214242	0.44 (0.2)	0.00142504	0.05 (0.03)	0.00313154	0.54 (0.08)	0.00217748
PTPN6	P282	0.00204249	0.8 (0.15)	0.0015067	0.24 (0.13)	0.00293422	0.74 (0.12)	0.00134527
PTPNS1	E433	4.34237e-05	0.02 (0.01)	7.51562e-05	0.01 (0.01)	1.07386e-05	0.02 (0.01)	5.66739e-06
PTPNS1	P301	2.10834e-05	0.03 (0.01)	9.25888e-06	0.02 (0.01)	3.83749e-05	0.05 (0.02)	1.50115e-05
PTPRF	E178	-1.24504e-07	0.14 (0.06)	1.0457e-07	0.11 (0.05)	3.63578e-07	0.16 (0.09)	-3.67778e-06
PTPRG	E40	-2.02096e-07	0.06 (0.02)	4.091e-08	0.07 (0.03)	-3.76745e-08	0.06 (0.03)	-2.3602e-06
PTPRG	P476	2.03367e-07	0.03 (0.01)	2.30144e-07	0.03 (0.02)	-1.82299e-08	0.03 (0.01)	8.24603e-07
PTPRH	E173	0.00468904	0.7 (0.13)	0.00295755	0.25 (0.07)	0.00761712	0.6 (0.15)	0.00228618
PTPRH	P255	0.000623691	0.91 (0.05)	0.000343396	0.93 (0.03)	7.50607e-05	0.64 (0.09)	0.00471836
PTPRO	E56	0.00125794	0.02 (0.01)	0.000868403	0.01 (0)	4.89574e-05	0.75 (0.19)	0.0093714
PTPRO	P371	0.000671214	0.18 (0.08)	0.000438592	0.16 (0.06)	3.47303e-05	0.78 (0.1)	0.00495525
PURA	P928	0.000526565	0.05 (0.03)	0.000416519	0.03 (0.03)	1.74878e-05	0.7 (0.2)	0.00335617
PWCR1	E81	0.000129914	0.97 (0.01)	7.01904e-05	0.97 (0.01)	9.37759e-06	0.93 (0.03)	0.00101551
PWCR1	P357	1.24109e-05	0.88 (0.03)	9.57122e-06	0.86 (0.03)	6.12752e-06	0.78 (0.12)	5.65847e-05
PWCR1	P811	6.81119e-05	0.92 (0.03)	1.65822e-05	0.92 (0.03)	2.04062e-06	0.81 (0.05)	0.000705051
PXN	P308	7.39607e-05	0.15 (0.06)	4.22492e-05	0.33 (0.11)	0.000131595	0.16 (0.06)	1.21037e-05
PYCARD	E87	1.92594e-05	0.07 (0.08)	1.48044e-05	0.04 (0.01)	1.74122e-05	0.41 (0.26)	5.19043e-05
PYCARD	P150	3.20812e-05	0.47 (0.15)	4.58156e-05	0.35 (0.18)	1.84049e-05	0.52 (0.09)	1.32455e-05
PYCARD	P393	7.85693e-05	0.26 (0.1)	4.60937e-05	0.27 (0.11)	4.3009e-06	0.61 (0.1)	0.000601296
RAB32	E314	3.63442e-06	0.08 (0.05)	7.45512e-07	0.04 (0.02)	8.56448e-06	0.07 (0.08)	-3.2228e-06
RAB32	P493	0.00306672	0.27 (0.13)	0.00174064	0.03 (0.02)	0.00494008	0.34 (0.12)	0.00294834
RAD50	P191	0.000133365	0.63 (0.16)	4.67872e-05	0.83 (0.06)	0.000103442	0.24 (0.09)	0.000815809
RAD54B	P227	4.0263e-06	0.15 (0.07)	6.23428e-06	0.19 (0.09)	6.39351e-07	0.26 (0.08)	6.5241e-06
RAF1	P330	1.69399e-06	0.1 (0.04)	2.61753e-06	0.12 (0.07)	3.89838e-07	0.17 (0.06)	2.14538e-06
RAN	P581	7.6408e-05	0.69 (0.1)	3.34276e-05	0.75 (0.08)	7.49453e-06	0.35 (0.11)	0.00062699
RAP1A	P285	1.48712e-06	0.32 (0.09)	2.94443e-07	0.38 (0.1)	6.61271e-07	0.3 (0.08)	1.10988e-05
RARA	E128	1.02898e-05	0.13 (0.06)	9.65064e-06	0.08 (0.03)	1.35244e-05	0.13 (0.06)	-3.64214e-07
RARA	P1076	0.000587281	0.52 (0.2)	0.000562944	0.15 (0.11)	0.000663093	0.78 (0.08)	0.000423096
RARA	P176	9.00655e-07	0.37 (0.13)	6.84878e-07	0.32 (0.16)	-1.90865e-07	0.29 (0.14)	7.56032e-06
RARB	E114	0.00130624	0.06 (0.03)	0.000879669	0.04 (0.01)	0.000114432	0.62 (0.08)	0.00944513
RARB	P60	3.77449e-06	0.23 (0.11)	8.51154e-07	0.16 (0.09)	6.02926e-06	0.37 (0.13)	9.33889e-06
RARRES1	E235	9.97792e-06	0.06 (0.03)	3.53987e-06	0.05 (0.02)	1.49373e-05	0.27 (0.25)	2.28778e-05
RARRES1	P426	8.61166e-05	0.48 (0.15)	7.75264e-05	0.76 (0.1)	0.000116606	0.52 (0.21)	5.95087e-06
RARRES1	P57	1.93013e-06	0.72 (0.18)	1.15528e-06	0.68 (0.2)	-6.67956e-07	0.75 (0.08)	1.83282e-05
RASA1	E107	1.83285e-06	0.03 (0.01)	1.27166e-06	0.02 (0.01)	2.42061e-06	0.04 (0.02)	2.34278e-06
RASGRF1	E16	0.000208152	0.04 (0.06)	0.000103998	0.02 (0.01)	2.14226e-05	0.24 (0.11)	0.00168598
			Solid tissues (n=113)		Blood (n=85)		Placenta (n=19)
GENE	CpG	Mean decrease in accuracy	Mean (sd)	Decrease in accuracy	Mean (sd)	Decrease in accuracy	Mean (sd)	Decrease in accuracy
RASGRF1	P768	9.68059e-06	0.06 (0.02)	1.37905e-05	0.05 (0.03)	2.83444e-06	0.13 (0.08)	1.43498e-05
RASSF1	E116	0.000760845	0.06 (0.06)	0.000445291	0.03 (0.02)	6.94566e-05	0.75 (0.15)	0.0059496
RASSF1	P244	0.000258303	0.09 (0.15)	0.000202895	0.02 (0.01)	0.000100444	0.78 (0.13)	0.00130459
RBL2	P250	1.62788e-05	0.08 (0.03)	1.36287e-05	0.15 (0.07)	6.86642e-06	0.04 (0.02)	7.6406e-05
RBP1	E158	4.44783e-05	0.03 (0.01)	2.35347e-05	0.01 (0)	8.0572e-05	0.03 (0.01)	8.06705e-06
RBP1	P150	2.76907e-06	0.04 (0.02)	4.39632e-06	0.02 (0.01)	1.80903e-06	0.03 (0.02)	-3.69762e-06
RBP1	P426	1.87108e-05	0.29 (0.13)	1.50534e-05	0.19 (0.06)	1.89704e-05	0.16 (0.07)	4.06898e-05
RET	P717	6.86893e-06	0.07 (0.03)	1.05978e-05	0.05 (0.02)	2.28159e-06	0.06 (0.02)	6.67778e-06
RET	S374	1.16285e-06	0.07 (0.03)	1.51765e-06	0.05 (0.04)	8.22285e-07	0.13 (0.1)	6.64957e-07
RET	S260	9.97084e-06	0.07 (0.06)	1.26637e-06	0.04 (0.02)	2.27113e-05	0.08 (0.03)	4.73961e-06
RHOC	P536	3.76389e-07	0.06 (0.05)	8.31547e-07	0.05 (0.04)	3.03001e-07	0.06 (0.04)	-1.8899e-06
RHOH	P121	0.0124752	0.8 (0.09)	0.010076	0.03 (0.02)	0.0166569	0.94 (0.02)	0.00916293
RHOH	P953	3.5958e-05	0.93 (0.02)	8.51675e-06	0.91 (0.04)	9.58985e-06	0.86 (0.04)	0.000316213
RIPK1	P744	0.000301811	0.82 (0.08)	0.000108078	0.94 (0.02)	0.000546298	0.84 (0.05)	0.000395972
RIPK1	P868	2.02818e-05	0.87 (0.08)	1.19724e-05	0.92 (0.02)	2.49473e-05	0.94 (0.02)	4.77424e-05
RIPK2	E123	5.1802e-07	0.07 (0.03)	1.03163e-06	0.07 (0.02)	1.35356e-07	0.08 (0.04)	-6.94444e-07
RIPK3	P124	0.00111673	0.46 (0.2)	0.000550097	0.1 (0.06)	0.00182469	0.63 (0.13)	0.00140776
RIPK3	P24	0.00677656	0.33 (0.21)	0.00579442	0.03 (0.02)	0.00852728	0.57 (0.16)	0.00542822
RIPK4	E166	6.79544e-07	0.08 (0.03)	1.22294e-06	0.06 (0.02)	1.21495e-07	0.07 (0.03)	-2.02381e-07
RIPK4	P172	1.84906e-06	0.1 (0.04)	-1.09377e-07	0.08 (0.02)	5.63711e-06	0.11 (0.05)	-3.90397e-06
ROR1	P6	1.1622e-05	0.06 (0.04)	1.85404e-05	0.04 (0.01)	4.52104e-06	0.05 (0.01)	3.94993e-06
ROR2	E112	4.25093e-05	0.09 (0.04)	2.70495e-06	0.05 (0.02)	0.000106649	0.1 (0.06)	-1.19127e-06
ROR2	P317	9.23794e-06	0.07 (0.03)	1.39433e-05	0.07 (0.05)	5.13455e-06	0.1 (0.05)	1.38889e-07
RRAS	P100	3.07721e-05	0.04 (0.02)	4.79367e-05	0.05 (0.04)	1.45023e-05	0.06 (0.06)	9.04762e-07
RUNX1T1	E145	0.00123874	0.38 (0.11)	0.000847142	0.31 (0.08)	3.65517e-05	0.86 (0.04)	0.00925746
RUNX1T1	P103	9.06711e-05	0.33 (0.15)	6.43987e-06	0.15 (0.07)	0.000213065	0.53 (0.16)	4.65573e-05
RUNX3	E27	0.00011761	0.9 (0.05)	8.01296e-06	0.84 (0.05)	0.000287588	0.92 (0.03)	1.16377e-05
RUNX3	P247	0.000161063	0.88 (0.07)	1.60253e-05	0.73 (0.08)	0.000349851	0.94 (0.03)	0.00018841
RUNX3	P393	4.41647e-05	0.89 (0.05)	2.84248e-05	0.77 (0.09)	7.0851e-05	0.91 (0.04)	1.8688e-05
RYK	P493	1.27979e-06	0.09 (0.1)	1.60638e-06	0.14 (0.09)	9.81398e-07	0.12 (0.08)	5.05556e-07
S100A12	P1221	5.77687e-06	0.83 (0.04)	-1.02793e-06	0.87 (0.04)	5.18652e-06	0.82 (0.04)	4.91972e-05
S100A2	E36	1.89515e-05	0.46 (0.17)	1.02238e-05	0.51 (0.09)	2.28914e-05	0.72 (0.1)	5.48795e-05
S100A2	P1186	0.000288421	0.79 (0.14)	7.20678e-05	0.92 (0.02)	0.000642559	0.86 (0.05)	2.67863e-05
S100A4	E315	0.00232116	0.37 (0.23)	0.00147217	0.07 (0.03)	0.00397647	0.17 (0.06)	0.000141916
S100A4	P194	0.00373266	0.83 (0.08)	0.00205677	0.5 (0.08)	0.00604279	0.92 (0.03)	0.00375236
S100A4	P887	4.27047e-06	0.89 (0.04)	4.05366e-07	0.9 (0.04)	1.06984e-06	0.85 (0.06)	4.09931e-05
SCGB3A1	E55	8.61708e-05	0.14 (0.1)	7.4009e-05	0.06 (0.04)	0.000122272	0.17 (0.1)	3.39105e-07
SEMA3A	P343	-6.67331e-08	0.14 (0.06)	-2.48382e-07	0.14 (0.07)	1.70461e-07	0.29 (0.28)	2.19048e-07
SEMA3A	P658	-6.79043e-07	0.35 (0.09)	-4.27642e-07	0.32 (0.09)	-3.35258e-08	0.29 (0.12)	-6.16277e-06
SEMA3B	E96	0.00126992	0.15 (0.05)	0.000879214	0.14 (0.04)	3.36078e-05	0.62 (0.1)	0.00942996
SEMA3B	P110	0.000223828	0.14 (0.05)	0.00017547	0.19 (0.07)	2.48982e-06	0.58 (0.16)	0.00144386
SEMA3C	E49	7.63873e-07	0.09 (0.04)	9.80521e-07	0.07 (0.03)	8.76582e-07	0.08 (0.04)	-1.34444e-06
SEMA3C	P642	4.84871e-05	0.42 (0.15)	4.00047e-05	0.19 (0.09)	5.77323e-05	0.24 (0.08)	5.87444e-05
SEMA3F	E333	8.29698e-07	0.16 (0.06)	1.44035e-07	0.17 (0.06)	-8.1169e-08	0.12 (0.06)	9.25193e-06
SEMA3F	P692	9.56213e-06	0.06 (0.02)	8.21971e-06	0.03 (0.02)	1.21219e-05	0.07 (0.05)	4.82698e-06
SEPT5	P441	0.000407282	0.28 (0.1)	0.000314402	0.57 (0.09)	0.00037129	0.08 (0.05)	0.00119551
SEPT5	P464	0.000620986	0.44 (0.12)	0.000294771	0.73 (0.06)	0.000871313	0.21 (0.07)	0.00148788
SEPT9	P374	1.08093e-05	0.33 (0.19)	3.71406e-06	0.38 (0.11)	1.22256e-05	0.62 (0.13)	4.84994e-05
SEPT9	P58	2.0517e-05	0.67 (0.12)	5.10251e-06	0.83 (0.11)	4.39932e-05	0.74 (0.15)	1.71479e-06
SERPINA5	E69	1.12127e-06	0.79 (0.05)	-3.63447e-07	0.78 (0.05)	-5.50743e-07	0.74 (0.06)	1.55953e-05
SERPINA5	P156	2.12216e-05	0.43 (0.13)	1.07978e-05	0.27 (0.09)	3.7591e-05	0.34 (0.12)	8.49387e-06
SERPINB2	P939	9.51397e-07	0.95 (0.01)	8.71194e-07	0.95 (0.02)	1.39432e-06	0.95 (0.01)	-1.36825e-06
SERPINB5	P19	9.44098e-05	0.91 (0.12)	1.31482e-05	0.96 (0.01)	7.68478e-05	0.61 (0.13)	0.000691487
SERPINE1	E189	3.64888e-06	0.23 (0.08)	1.63722e-06	0.26 (0.06)	7.54552e-06	0.23 (0.08)	-2.01429e-06
SERPINE1	P519	8.05379e-06	0.34 (0.16)	1.57678e-06	0.37 (0.1)	6.98657e-06	0.18 (0.1)	4.78624e-05
SEZ6L	P249	4.20048e-05	0.04 (0.03)	5.15787e-05	0.02 (0.01)	3.2698e-05	0.15 (0.13)	2.86392e-05
SEZ6L	P299	3.49946e-06	0.07 (0.04)	5.30616e-06	0.05 (0.02)	1.8925e-06	0.07 (0.04)	3.8254e-07
SFN	E118	3.35436e-05	0.88 (0.08)	1.52811e-05	0.94 (0.01)	6.49702e-05	0.93 (0.02)	5.92713e-07
SFN	P248	0.00030344	0.22 (0.08)	0.000135005	0.08 (0.04)	0.000345249	0.47 (0.09)	0.00109
SFRP1	E398	1.62101e-05	0.07 (0.05)	2.5878e-05	0.04 (0.02)	7.00816e-06	0.05 (0.02)	-1.27056e-07
SFRP1	P157	2.88653e-05	0.1 (0.1)	3.86084e-06	0.05 (0.03)	6.801e-05	0.12 (0.06)	6.16745e-06
SFTPA1	E340	2.98412e-05	0.94 (0.03)	3.71517e-06	0.96 (0.01)	3.92834e-05	0.88 (0.05)	0.000151056
SFTPA1	P421	9.40401e-06	0.83 (0.06)	3.56187e-06	0.78 (0.06)	1.90115e-05	0.86 (0.04)	8.8189e-07
SFTPB	P689	6.87085e-06	0.79 (0.06)	9.02009e-06	0.75 (0.1)	2.8889e-06	0.83 (0.04)	1.3067e-05
SFTPC	E13	1.94664e-05	0.77 (0.07)	4.8669e-06	0.81 (0.09)	3.08255e-06	0.59 (0.12)	0.000181424
SFTPD	E169	4.41136e-06	0.87 (0.05)	3.54499e-07	0.9 (0.02)	1.06406e-05	0.91 (0.02)	3.69078e-06
SGCE	E149	2.18279e-05	0.12 (0.05)	9.99732e-06	0.12 (0.06)	5.71457e-06	0.35 (0.11)	0.000156127
SGCE	P250	3.88045e-05	0.88 (0.03)	7.20711e-06	0.86 (0.02)	7.17115e-05	0.92 (0.05)	7.37461e-05
SH3BP2	E18	1.01614e-05	0.27 (0.11)	6.01373e-06	0.21 (0.1)	3.33239e-06	0.5 (0.12)	6.58852e-05
SH3BP2	P771	2.15929e-06	0.21 (0.09)	1.7379e-06	0.19 (0.1)	3.00409e-07	0.36 (0.12)	1.36939e-05
SHB	P473	1.83933e-05	0.03 (0.02)	2.59078e-05	0.02 (0.01)	1.13686e-05	0.05 (0.02)	6.49048e-06
SHB	P691	0.000803582	0.13 (0.09)	0.000551566	0.03 (0.01)	0.00133469	0.07 (0.04)	2.35628e-05
SHH	E328	0.000872258	0.28 (0.1)	0.00057657	0.29 (0.08)	2.0325e-05	0.81 (0.08)	0.00661787
SHH	P104	4.76961e-06	0.09 (0.03)	6.53588e-07	0.06 (0.02)	1.07966e-05	0.15 (0.11)	3.03333e-06
SIN3B	P514	1.38861e-05	0.91 (0.06)	-7.74288e-07	0.92 (0.03)	7.78684e-07	0.83 (0.08)	0.000165281
SIN3B	P607	1.34507e-06	0.91 (0.03)	3.93401e-07	0.9 (0.03)	1.3357e-06	0.94 (0.02)	7.13095e-06
SKI	E465	9.50177e-06	0.05 (0.03)	7.53041e-06	0.03 (0.01)	1.213e-05	0.07 (0.03)	7.91111e-06
SLC14A1	E295	1.53357e-05	0.85 (0.04)	5.03314e-06	0.83 (0.05)	3.01781e-06	0.74 (0.07)	0.000125823
SLC14A1	P369	2.37818e-05	0.76 (0.08)	9.37489e-06	0.84 (0.05)	1.75475e-05	0.7 (0.1)	0.000144103
SLC22A18	P216	1.68875e-05	0.71 (0.13)	5.59363e-06	0.59 (0.12)	2.59223e-05	0.59 (0.15)	4.66241e-05
SLC22A18	P472	8.83483e-06	0.87 (0.04)	1.44516e-06	0.86 (0.03)	1.8835e-05	0.9 (0.04)	1.00501e-05
SLC22A2	E271	5.56445e-06	0.96 (0.02)	1.28552e-06	0.96 (0.01)	1.17314e-06	0.91 (0.06)	4.68556e-05
SLC22A2	P109	0.000298577	0.82 (0.06)	0.000150821	0.85 (0.05)	2.05668e-05	0.52 (0.08)	0.00249957
SLC22A3	E122	3.56497e-06	0.1 (0.07)	4.43645e-06	0.07 (0.05)	3.39877e-06	0.21 (0.21)	-5.19841e-07
SLC22A3	P528	0.000668946	0.31 (0.1)	0.000675078	0.13 (0.04)	0.00072194	0.36 (0.11)	0.000432
SLC22A3	P634	1.14844e-05	0.67 (0.12)	6.00055e-06	0.55 (0.1)	2.03804e-05	0.68 (0.08)	2.93254e-06
SLC5A5	E60	0.000906026	0.68 (0.1)	0.000654607	0.33 (0.12)	0.00137037	0.63 (0.12)	0.000356588
SLC5A8	E60	2.13614e-06	0.31 (0.11)	1.39629e-06	0.26 (0.09)	1.83108e-06	0.35 (0.1)	7.51991e-06
SLC5A8	P38	5.9156e-07	0.12 (0.07)	1.57904e-07	0.1 (0.04)	9.5293e-07	0.09 (0.05)	2.82222e-06
SLIT2	E111	6.88839e-05	0.36 (0.15)	3.99251e-05	0.23 (0.1)	3.83844e-05	0.68 (0.13)	0.000344624
SLIT2	P208	0.000313838	0.11 (0.06)	0.000167883	0.07 (0.03)	2.63214e-05	0.69 (0.19)	0.00252476
SMAD2	P708	2.06132e-06	0.03 (0.01)	4.05054e-07	0.03 (0.01)	2.51251e-06	0.05 (0.02)	1.04955e-05
SMAD2	P848	4.35533e-07	0.23 (0.08)	1.65066e-07	0.17 (0.06)	2.45356e-06	0.26 (0.08)	-7.24103e-06
SMAD4	P474	4.16259e-06	0.03 (0.01)	7.33984e-06	0.02 (0.01)	5.31481e-07	0.04 (0.03)	2.01905e-06
SMARCA3	E20	1.43849e-05	0.05 (0.02)	2.15119e-05	0.03 (0.01)	8.66544e-06	0.07 (0.04)	-8.35714e-07
SMARCA3	P109	1.70839e-06	0.06 (0.02)	1.18475e-06	0.04 (0.03)	1.3564e-06	0.11 (0.08)	6.37229e-06
SMARCA3	P17	8.43668e-06	0.11 (0.05)	1.35396e-05	0.08 (0.05)	2.84231e-06	0.19 (0.13)	3.90714e-06
SMARCA4	P362	0.000261218	0.04 (0.01)	0.000441408	0.03 (0.01)	7.54069e-05	0.05 (0.03)	4.33103e-05
SMARCB1	P220	0.000360848	0.3 (0.15)	0.000207524	0.67 (0.09)	0.000545094	0.26 (0.12)	0.000454574
SMO	E57	2.32991e-05	0.06 (0.02)	3.18101e-05	0.04 (0.02)	1.78506e-05	0.07 (0.03)	-2.52771e-06
			Solid tissues (n=113)		Blood (n=85)		Placenta (n=19)
GENE	CpG	Mean decrease in accuracy	Mean (sd)	Decrease in accuracy	Mean (sd)	Decrease in accuracy	Mean (sd)	Decrease in accuracy
SMO	P455	2.97595e-05	0.09 (0.04)	2.50026e-05	0.04 (0.02)	4.35957e-05	0.06 (0.03)	-2.80007e-06
SNCG	E119	0.00195576	0.49 (0.15)	0.00167706	0.84 (0.06)	0.00226705	0.28 (0.12)	0.00239882
SNCG	P53	0.000144542	0.48 (0.16)	7.42453e-05	0.77 (0.1)	0.000192939	0.35 (0.13)	0.00034237
SNCG	P98	3.13374e-05	0.56 (0.14)	2.92158e-05	0.74 (0.08)	2.79952e-05	0.49 (0.14)	5.50159e-05
SNRPN	E14	9.66207e-07	0.85 (0.06)	-8.05043e-07	0.84 (0.04)	1.38262e-06	0.78 (0.13)	9.64372e-06
SNRPN	P230	4.10971e-07	0.93 (0.02)	4.91635e-07	0.93 (0.03)	6.20655e-07	0.93 (0.02)	-1.03175e-07
SNRPN	S127	2.94109e-05	0.72 (0.06)	6.97324e-06	0.62 (0.05)	6.31063e-05	0.75 (0.09)	9.99553e-06
SNRPN	S99	3.37505e-07	0.76 (0.05)	-4.0258e-07	0.78 (0.05)	5.84606e-07	0.73 (0.08)	2.79444e-06
SNURF	E256	2.32524e-06	0.84 (0.04)	2.25299e-06	0.84 (0.03)	1.95675e-07	0.88 (0.07)	1.14562e-05
SNURF	P2	-1.5229e-07	0.55 (0.06)	4.01533e-07	0.54 (0.07)	-6.64731e-07	0.53 (0.13)	-1.11818e-06
SNURF	P78	3.1096e-05	0.82 (0.07)	1.63058e-06	0.78 (0.04)	7.80885e-05	0.85 (0.08)	6.81962e-07
SOD3	P225	0.00189442	0.94 (0.02)	0.0016381	0.85 (0.04)	0.00255952	0.94 (0.03)	0.000600629
SOD3	P460	1.05153e-05	0.87 (0.05)	3.05959e-06	0.83 (0.04)	2.19098e-05	0.87 (0.02)	1.31746e-07
SOX1	P1018	0.000103471	0.07 (0.08)	4.40232e-05	0.02 (0.01)	0.00015147	0.23 (0.15)	0.000251572
SOX1	P294	6.0305e-06	0.1 (0.06)	8.55179e-07	0.07 (0.03)	6.55451e-06	0.26 (0.14)	3.55672e-05
SOX17	P287	1.58097e-06	0.39 (0.17)	9.6408e-07	0.27 (0.11)	4.69706e-06	0.39 (0.16)	-9.27335e-06
SOX17	P303	4.28728e-06	0.22 (0.12)	2.12842e-06	0.14 (0.05)	7.91552e-06	0.2 (0.08)	-3.50244e-07
SOX2	P546	5.09667e-05	0.08 (0.05)	1.01423e-05	0.04 (0.02)	5.36185e-05	0.32 (0.15)	0.000279248
SPARC	E50	0.000105685	0.18 (0.06)	8.48602e-06	0.11 (0.02)	0.000258132	0.21 (0.06)	1.92344e-05
SPARC	P195	3.69668e-06	0.27 (0.11)	9.47856e-07	0.22 (0.08)	7.66246e-06	0.17 (0.09)	3.22222e-06
SPDEF	E116	9.8563e-05	0.4 (0.12)	0.00012401	0.57 (0.08)	4.96651e-05	0.64 (0.14)	0.000154569
SPDEF	P6	1.63168e-05	0.54 (0.14)	1.69504e-05	0.67 (0.14)	1.1765e-06	0.82 (0.11)	7.25344e-05
SPI1	E205	0.000504536	0.58 (0.1)	0.000481331	0.3 (0.09)	0.000515028	0.65 (0.08)	0.000642922
SPI1	P48	0.00307289	0.88 (0.07)	0.00195072	0.39 (0.15)	0.00491209	0.88 (0.15)	0.00176182
SPI1	P929	3.273e-05	0.84 (0.07)	3.74394e-06	0.86 (0.03)	9.51726e-06	0.76 (0.03)	0.00032371
SPP1	E140	0.00185576	0.48 (0.1)	0.00141863	0.14 (0.08)	0.00230703	0.68 (0.09)	0.00255442
SPP1	P647	6.39915e-05	0.79 (0.09)	4.48906e-05	0.56 (0.16)	8.16917e-05	0.87 (0.05)	9.62749e-05
SRC	E100	7.69625e-06	0.72 (0.12)	2.31725e-06	0.8 (0.09)	1.13871e-05	0.73 (0.05)	2.55223e-05
SRC	P164	5.54019e-05	0.89 (0.04)	2.72548e-06	0.92 (0.02)	5.24826e-05	0.81 (0.06)	0.000395079
SRC	P297	-3.47259e-07	0.95 (0.01)	-7.11132e-07	0.96 (0.01)	2.26164e-07	0.96 (0.02)	-1.3e-06
ST6GAL1	P164	5.88555e-06	0.18 (0.11)	8.25182e-06	0.13 (0.1)	3.30907e-06	0.19 (0.12)	4.29444e-06
ST6GAL1	P528	1.68946e-05	0.11 (0.08)	2.82135e-05	0.08 (0.06)	5.86597e-06	0.12 (0.06)	-1.20072e-06
STAT5A	E42	0.00030889	0.29 (0.14)	0.000154262	0.14 (0.05)	0.000182884	0.78 (0.07)	0.00174427
STAT5A	P704	0.0005244	0.7 (0.19)	0.000228276	0.23 (0.1)	0.000975413	0.44 (0.1)	0.000307546
STK11	P295	3.76366e-05	0.35 (0.12)	4.00415e-06	0.22 (0.08)	9.11639e-05	0.43 (0.16)	2.03925e-06
SYK	E372	5.43594e-06	0.04 (0.01)	1.99188e-07	0.03 (0.01)	1.2096e-05	0.05 (0.03)	5.31674e-06
SYK	P584	0.000102463	0.7 (0.1)	7.6143e-05	0.49 (0.1)	0.000142154	0.78 (0.11)	8.66842e-05
TAL1	E122	0.000155873	0.07 (0.06)	8.20064e-05	0.04 (0.02)	3.92334e-05	0.4 (0.14)	0.00115228
TAL1	P594	0.000190036	0.22 (0.14)	8.05195e-05	0.12 (0.06)	4.91573e-05	0.8 (0.1)	0.00145195
TAL1	P817	0.00022709	0.61 (0.1)	0.000216567	0.36 (0.1)	0.000241321	0.74 (0.18)	0.0002311
TBX1	P520	4.71745e-05	0.81 (0.09)	3.05711e-07	0.7 (0.12)	0.000109211	0.89 (0.04)	5.7141e-05
TBX1	P885	0.000713931	0.25 (0.2)	0.000356411	0.05 (0.01)	0.00131177	0.17 (0.07)	0.000220597
TCF4	P175	1.57666e-06	0.08 (0.04)	2.47448e-06	0.08 (0.07)	1.5881e-07	0.14 (0.1)	3.03182e-06
TCF4	P317	1.72246e-06	0.12 (0.05)	3.45688e-06	0.13 (0.06)	3.11402e-07	0.16 (0.13)	-2.50079e-06
TCF7L2	E411	6.45981e-07	0.03 (0.01)	1.87466e-06	0.04 (0.02)	-2.48734e-07	0.04 (0.02)	-2.64365e-06
TCF7L2	P193	2.95759e-06	0.04 (0.02)	3.24793e-06	0.03 (0.02)	1.46185e-06	0.07 (0.05)	8.54841e-06
TDG	E129	1.41316e-05	0.83 (0.04)	1.29366e-05	0.83 (0.05)	2.50109e-06	0.75 (0.07)	7.36564e-05
TDGF1	E53	-4.94866e-08	0.81 (0.07)	-5.66804e-07	0.77 (0.08)	4.06574e-07	0.75 (0.1)	1.64834e-06
TDGF1	P428	2.74133e-05	0.51 (0.11)	8.8451e-06	0.31 (0.1)	5.71571e-05	0.6 (0.12)	6.57857e-06
TEK	E75	0.000219872	0.61 (0.1)	8.00652e-05	0.41 (0.08)	0.000203599	0.83 (0.07)	0.0011632
TEK	P479	2.18314e-06	0.83 (0.08)	2.27596e-06	0.88 (0.02)	2.07084e-06	0.87 (0.02)	3.46919e-06
TEK	P526	1.16513e-06	0.74 (0.06)	4.81496e-07	0.79 (0.03)	2.12282e-06	0.76 (0.05)	-1.4596e-07
TERT	E20	7.46706e-06	0.05 (0.02)	6.91552e-06	0.04 (0.01)	9.67996e-06	0.08 (0.03)	1.95837e-06
TERT	P360	0.000105565	0.16 (0.1)	1.09256e-05	0.08 (0.02)	0.000254575	0.15 (0.06)	1.81529e-05
TES	E172	5.40627e-06	0.23 (0.14)	8.02301e-07	0.17 (0.1)	1.13918e-05	0.34 (0.18)	5.31825e-06
TES	P182	1.31233e-05	0.22 (0.09)	8.1741e-06	0.13 (0.04)	2.20465e-05	0.17 (0.06)	3.05767e-06
TESK2	P252	0.000151551	0.03 (0.01)	0.000255301	0.02 (0)	4.93072e-05	0.03 (0.01)	1.23507e-05
TFAP2C	E260	3.16066e-05	0.07 (0.08)	5.09267e-05	0.04 (0.03)	7.10003e-06	0.03 (0.01)	2.54709e-05
TFAP2C	P765	2.27412e-05	0.12 (0.08)	2.26108e-05	0.05 (0.03)	2.72353e-05	0.2 (0.1)	5.67143e-06
TFDP1	P543	3.27082e-06	0.83 (0.04)	1.73879e-06	0.82 (0.04)	5.15342e-06	0.81 (0.04)	4.40253e-06
TFF1	P180	0.000436524	0.83 (0.07)	9.43161e-05	0.92 (0.02)	0.000895488	0.83 (0.05)	0.000470924
TFF2	P178	0.000105656	0.82 (0.1)	2.31321e-05	0.91 (0.02)	0.000203588	0.81 (0.07)	0.000159147
TFF2	P557	2.13889e-05	0.96 (0.02)	-2.70027e-07	0.96 (0.01)	4.5524e-06	0.91 (0.04)	0.00022381
TFPI2	E141	7.95241e-06	0.08 (0.04)	9.0603e-06	0.06 (0.02)	9.58337e-06	0.07 (0.04)	-3.31833e-06
TFPI2	P152	1.66682e-06	0.14 (0.06)	3.14068e-06	0.15 (0.04)	4.30478e-08	0.11 (0.05)	-2.40476e-07
TFPI2	P9	1.0608e-06	0.06 (0.04)	3.64267e-07	0.04 (0.02)	8.24229e-07	0.07 (0.04)	5.68556e-06
TFRC	P414	3.90533e-06	0.08 (0.02)	2.9235e-06	0.07 (0.02)	5.45808e-06	0.12 (0.04)	4.07713e-06
TGFA	P558	2.8628e-06	0.05 (0.02)	4.25635e-06	0.03 (0.03)	1.05946e-06	0.05 (0.02)	2.15e-06
TGFA	P642	1.20243e-05	0.06 (0.02)	2.01477e-05	0.04 (0.02)	4.5213e-06	0.06 (0.03)	-1.08016e-06
TGFB1	P833	9.24006e-07	0.94 (0.02)	6.97433e-07	0.94 (0.02)	5.69125e-07	0.93 (0.03)	3.74444e-06
TGFB2	E226	5.61949e-06	0.17 (0.07)	1.06376e-05	0.14 (0.07)	8.37049e-07	0.24 (0.13)	-1.50635e-06
TGFB2	P632	1.29946e-06	0.05 (0.02)	2.12277e-07	0.04 (0.01)	2.22952e-06	0.06 (0.02)	2.82576e-06
TGFB3	E58	0.00354372	0.77 (0.13)	0.00240096	0.95 (0.02)	0.0050829	0.71 (0.08)	0.00377897
TGFBI	P173	5.40732e-06	0.28 (0.12)	-6.88304e-08	0.22 (0.07)	8.63743e-06	0.48 (0.17)	2.2209e-05
TGFBI	P31	2.03605e-06	0.12 (0.05)	2.27276e-06	0.11 (0.04)	1.0103e-06	0.2 (0.07)	5.79683e-06
TGFBR3	E188	1.3217e-05	0.04 (0.02)	8.51515e-06	0.02 (0.01)	2.03567e-05	0.06 (0.03)	9.06032e-06
TGFBR3	P429	2.42163e-06	0.03 (0.01)	3.82042e-06	0.03 (0.02)	9.10836e-07	0.04 (0.02)	5.72894e-07
THBS1	E207	0.000100419	0.05 (0.03)	0.000136804	0.03 (0.01)	7.3632e-05	0.03 (0.01)	9.0653e-06
THBS1	P500	1.26736e-06	0.09 (0.03)	5.66995e-07	0.07 (0.04)	2.01972e-06	0.12 (0.05)	1.97222e-06
THBS2	E129	5.84147e-06	0.05 (0.02)	9.60282e-06	0.05 (0.02)	1.98165e-06	0.05 (0.03)	1.00642e-06
THBS2	P605	0.00041974	0.43 (0.21)	0.000417183	0.1 (0.07)	0.000499617	0.37 (0.19)	9.64204e-05
THPO	E483	0.00551914	0.93 (0.03)	0.00428242	0.67 (0.08)	0.00747941	0.95 (0.02)	0.00466312
THPO	P585	4.75825e-06	0.9 (0.04)	2.57391e-06	0.9 (0.04)	3.66176e-07	0.88 (0.02)	3.68802e-05
THY1	P149	5.12262e-05	0.12 (0.08)	3.89753e-06	0.06 (0.03)	7.27899e-05	0.46 (0.18)	0.000245297
THY1	P20	1.90521e-05	0.33 (0.14)	1.95627e-06	0.25 (0.1)	4.39192e-05	0.39 (0.05)	7.13102e-06
TIAM1	P117	3.49771e-07	0.07 (0.05)	-6.03001e-07	0.05 (0.03)	1.6212e-06	0.09 (0.06)	8.07071e-07
TIAM1	P188	4.89613e-06	0.06 (0.04)	9.18683e-06	0.06 (0.03)	2.55843e-09	0.04 (0.03)	1.96667e-06
TIE1	E66	0.00733069	0.76 (0.09)	0.0053882	0.26 (0.08)	0.0103854	0.91 (0.04)	0.00589959
TIMP2	E394	0.000131723	0.04 (0.01)	0.000215934	0.02 (0.01)	4.75899e-05	0.05 (0.03)	1.70188e-05
TIMP2	P267	9.08182e-06	0.2 (0.09)	2.45042e-06	0.13 (0.07)	1.95665e-05	0.27 (0.11)	2.34444e-06
TIMP3	P1114	0.00253903	0.96 (0.01)	0.00178119	0.96 (0.02)	3.38966e-05	0.66 (0.1)	0.0186526
TIMP3	P690	0.00238607	0.96 (0.01)	0.00166695	0.97 (0.01)	4.23158e-05	0.75 (0.13)	0.0175174
TIMP3	S38	1.30839e-05	0.08 (0.04)	3.18802e-06	0.04 (0.02)	2.9665e-05	0.08 (0.04)	-6.84921e-07
TJP1	P326	2.66284e-08	0.07 (0.03)	-1.72347e-07	0.06 (0.03)	3.05172e-07	0.08 (0.04)	1.74603e-07
TJP1	P390	5.61998e-06	0.05 (0.02)	2.49219e-06	0.03 (0.01)	4.33569e-06	0.03 (0.01)	3.44901e-05
TJP2	P330	5.66328e-05	0.09 (0.09)	4.01831e-06	0.03 (0.01)	0.000139683	0.06 (0.03)	4.78745e-06
TJP2	P518	6.94627e-05	0.36 (0.16)	5.33129e-05	0.21 (0.12)	7.6416e-05	0.69 (0.11)	0.000147888
TK1	E47	2.82897e-06	0.18 (0.05)	4.94442e-06	0.15 (0.09)	6.90376e-07	0.16 (0.08)	1.16739e-06
TK1	P62	2.37193e-05	0.04 (0.01)	3.95785e-05	0.03 (0.02)	7.065e-06	0.06 (0.04)	5.59452e-06
TM7SF3	P1068	0.000208315	0.9 (0.04)	0.000157087	0.75 (0.1)	0.000289421	0.94 (0.03)	0.000147661
			Solid tissues (n=113)		Blood (n=85)		Placenta (n=19)
GENE	CpG	Mean decrease in accuracy	Mean (sd)	Decrease in accuracy	Mean (sd)	Decrease in accuracy	Mean (sd)	Decrease in accuracy
TMEFF1	E180	5.10835e-06	0.03 (0.01)	5.62081e-06	0.02 (0.01)	4.34489e-06	0.04 (0.01)	5.3469e-06
TMEFF1	P234	8.4797e-07	0.06 (0.02)	1.4619e-06	0.05 (0.03)	1.93924e-07	0.09 (0.05)	4.68998e-07
TMEFF1	P626	0.000306339	0.59 (0.12)	9.30122e-05	0.33 (0.08)	0.000655373	0.58 (0.11)	4.82717e-05
TMEFF2	E94	1.27935e-06	0.11 (0.03)	1.10913e-06	0.1 (0.03)	1.89187e-06	0.15 (0.08)	-3.00216e-07
TMEFF2	P152	2.80689e-05	0.17 (0.06)	3.80661e-06	0.11 (0.02)	6.72603e-05	0.2 (0.08)	-1.42612e-06
TMEFF2	P210	5.64265e-06	0.21 (0.11)	1.47551e-06	0.12 (0.09)	5.3088e-06	0.44 (0.16)	2.97676e-05
TMEM63A	E63	7.75527e-07	0.06 (0.02)	4.58591e-07	0.09 (0.04)	-2.43113e-07	0.05 (0.02)	4.82272e-06
TMPRSS4	E83	3.16079e-05	0.89 (0.12)	1.61042e-05	0.95 (0.02)	5.82017e-05	0.93 (0.03)	7.90397e-06
TMPRSS4	P552	2.31965e-06	0.88 (0.08)	1.44352e-06	0.87 (0.04)	1.3989e-06	0.93 (0.02)	1.07532e-05
TNC	P198	6.08992e-08	0.14 (0.06)	1.61592e-07	0.17 (0.07)	-1.21472e-07	0.15 (0.07)	-1.60173e-07
TNC	P57	8.63985e-07	0.08 (0.04)	-2.42644e-07	0.07 (0.03)	2.34669e-06	0.11 (0.07)	6.74603e-07
TNF	P1084	1.29705e-05	0.95 (0.01)	4.38419e-06	0.95 (0.02)	3.10595e-07	0.93 (0.02)	0.000123749
TNF	P158	0.000449312	0.3 (0.15)	0.000501412	0.04 (0.04)	0.000481951	0.12 (0.09)	3.40971e-05
TNFRSF10A	P171	0.000111149	0.2 (0.13)	0.000183077	0.07 (0.06)	4.1465e-05	0.22 (0.11)	6.20794e-06
TNFRSF10A	P91	6.42611e-05	0.18 (0.09)	9.97459e-05	0.12 (0.08)	3.23363e-05	0.16 (0.08)	-5.45144e-07
TNFRSF10B	E198	2.42613e-06	0.09 (0.04)	4.02407e-07	0.07 (0.04)	3.05943e-06	0.13 (0.05)	1.11533e-05
TNFRSF10B	P108	2.18537e-07	0.12 (0.05)	4.52437e-07	0.12 (0.06)	4.82417e-08	0.15 (0.07)	-5.5e-07
TNFRSF10C	E109	1.12461e-06	0.1 (0.09)	1.95409e-06	0.06 (0.03)	7.11423e-07	0.07 (0.05)	-2.24591e-06
TNFRSF10C	P612	3.62183e-06	0.94 (0.02)	2.86455e-06	0.92 (0.09)	5.29528e-06	0.94 (0.05)	4.62121e-07
TNFRSF10C	P7	5.0449e-05	0.16 (0.12)	1.92027e-05	0.06 (0.02)	0.000103118	0.13 (0.06)	7.45933e-06
TNFRSF10D	E27	1.80519e-05	0.11 (0.11)	8.48878e-06	0.05 (0.03)	2.19981e-05	0.27 (0.16)	6.01952e-05
TNFRSF10D	P70	1.9212e-05	0.19 (0.19)	5.40477e-06	0.09 (0.03)	2.76795e-05	0.53 (0.18)	6.81541e-05
TNFRSF1A	P678	3.48361e-05	0.86 (0.05)	4.22902e-06	0.78 (0.05)	6.68668e-05	0.93 (0.03)	7.21934e-05
TNFRSF1B	E5	-3.57703e-07	0.11 (0.04)	-5.52767e-07	0.09 (0.03)	7.29164e-07	0.1 (0.06)	-3.89315e-06
TNFRSF1B	P167	1.62192e-05	0.08 (0.04)	1.6854e-05	0.05 (0.03)	1.39009e-05	0.12 (0.05)	2.33804e-05
TNFSF10	E53	6.28044e-05	0.18 (0.14)	1.96777e-05	0.08 (0.04)	5.31327e-05	0.67 (0.15)	0.000358794
TNFSF10	P2	0.00115401	0.52 (0.2)	0.000561308	0.11 (0.06)	0.00173702	0.92 (0.05)	0.00213472
TNFSF8	E258	0.012234	0.86 (0.07)	0.00987542	0.11 (0.09)	0.0165158	0.92 (0.03)	0.00821164
TNFSF8	P184	0.0123165	0.63 (0.13)	0.00995783	0.02 (0.01)	0.0165793	0.84 (0.13)	0.00849511
TNK1	P221	0.000538315	0.37 (0.12)	0.000354542	0.5 (0.09)	1.91136e-05	0.86 (0.09)	0.00407032
TNK1	P41	0.000638249	0.13 (0.06)	0.000452172	0.15 (0.07)	9.67041e-06	0.8 (0.16)	0.00454895
TP73	E155	8.0328e-07	0.06 (0.02)	3.48465e-07	0.05 (0.02)	9.8987e-07	0.06 (0.03)	2.34127e-06
TP73	P496	6.29192e-06	0.06 (0.03)	2.62983e-06	0.04 (0.02)	4.90202e-06	0.12 (0.05)	3.35986e-05
TP73	P945	0.000107003	0.12 (0.05)	5.04361e-05	0.07 (0.02)	7.44278e-05	0.33 (0.13)	0.000561293
TPEF	S36	0.000100989	0.05 (0.02)	1.24837e-05	0.03 (0.01)	0.000235165	0.09 (0.06)	3.2984e-05
TPEF	S88	0.000318149	0.13 (0.09)	4.85918e-05	0.05 (0.02)	0.000462309	0.57 (0.16)	0.00141795
TRAF4	P372	1.67328e-06	0.32 (0.12)	1.0927e-07	0.27 (0.12)	4.37939e-07	0.27 (0.07)	1.76254e-05
TRIM29	E189	0.000138266	0.82 (0.11)	3.32975e-05	0.9 (0.04)	5.75816e-05	0.49 (0.09)	0.00115928
TRIM29	P135	0.000102195	0.86 (0.12)	8.75946e-06	0.92 (0.02)	0.000135781	0.66 (0.09)	0.000533408
TRIM29	P261	0.000113151	0.86 (0.16)	1.62201e-05	0.95 (0.02)	0.00012243	0.44 (0.13)	0.000669696
TRIP6	E33	4.92037e-07	0.13 (0.06)	4.03105e-07	0.09 (0.03)	6.62127e-07	0.11 (0.04)	2.67532e-07
TRIP6	P1090	0.00246563	0.61 (0.15)	0.00357852	0.73 (0.32)	0.000175738	0.95 (0.03)	0.0063482
TRIP6	P1274	0.00193777	0.58 (0.12)	0.00292647	0.79 (0.17)	0.000157435	0.87 (0.04)	0.00416346
TRPM5	E87	0.000342922	0.91 (0.03)	0.000143277	0.92 (0.02)	1.72206e-05	0.77 (0.08)	0.00303829
TRPM5	P721	0.000427306	0.74 (0.09)	0.000374385	0.88 (0.04)	0.000428024	0.53 (0.17)	0.000776526
TRPM5	P979	3.07754e-05	0.85 (0.07)	2.56269e-06	0.9 (0.03)	4.14298e-05	0.78 (0.06)	0.000151926
TSC2	E140	0.00089708	0.32 (0.12)	0.000455248	0.67 (0.09)	0.0013156	0.15 (0.08)	0.00173517
TSG101	P139	2.03695e-06	0.07 (0.02)	1.93737e-06	0.07 (0.03)	5.07575e-07	0.1 (0.03)	8.21361e-06
TSG101	P257	-2.79958e-07	0.31 (0.11)	-3.36742e-07	0.22 (0.11)	1.04397e-08	0.32 (0.13)	-6.8254e-07
TSP50	E21	1.92663e-05	0.78 (0.08)	3.56221e-06	0.79 (0.08)	1.08806e-06	0.59 (0.14)	0.00019532
TSP50	P137	2.5887e-05	0.52 (0.16)	2.05865e-06	0.54 (0.19)	-1.51931e-07	0.23 (0.1)	0.000296635
TUBB3	E91	7.52232e-06	0.22 (0.14)	9.56608e-08	0.19 (0.15)	-1.76399e-07	0.09 (0.05)	9.27118e-05
TUBB3	P364	4.10577e-05	0.03 (0.01)	6.65035e-05	0.02 (0.01)	1.51147e-05	0.03 (0.01)	4.06977e-06
TUBB3	P721	5.22115e-06	0.14 (0.06)	6.21337e-06	0.16 (0.09)	9.6931e-08	0.31 (0.12)	1.91664e-05
TUSC3	E29	1.93389e-06	0.15 (0.12)	4.74897e-07	0.08 (0.05)	6.24127e-06	0.14 (0.17)	-9.55404e-06
TUSC3	P85	-4.40375e-07	0.13 (0.06)	1.26118e-07	0.1 (0.04)	1.84578e-08	0.16 (0.12)	-6.90397e-06
TWIST1	E117	1.15891e-06	0.07 (0.09)	7.44723e-07	0.04 (0.03)	1.81008e-06	0.06 (0.05)	1.14841e-06
TWIST1	P355	8.06522e-05	0.14 (0.07)	4.04961e-06	0.06 (0.02)	0.000192876	0.24 (0.09)	3.74253e-05
TWIST1	P44	1.46676e-06	0.08 (0.07)	1.99121e-06	0.06 (0.03)	1.2032e-06	0.07 (0.04)	-8.73016e-09
TYK2	P494	3.86939e-06	0.2 (0.1)	1.22528e-06	0.15 (0.07)	1.86628e-06	0.13 (0.05)	2.90598e-05
TYRO3	P366	8.56461e-07	0.13 (0.06)	1.05039e-06	0.14 (0.05)	4.81795e-07	0.15 (0.1)	9.47691e-07
TYRO3	P501	1.59692e-06	0.03 (0.01)	1.97679e-07	0.02 (0.02)	9.31972e-07	0.05 (0.03)	1.23413e-05
UBA52	P293	3.36164e-06	0.1 (0.05)	5.57964e-06	0.13 (0.08)	1.06371e-06	0.12 (0.1)	6.03247e-07
UGT1A1	E11	5.33224e-06	0.97 (0.02)	2.2789e-06	0.97 (0.01)	9.00122e-07	0.94 (0.03)	3.80168e-05
UGT1A1	P315	0.000251409	0.85 (0.05)	0.000138899	0.92 (0.02)	0.000154978	0.68 (0.05)	0.0013903
UGT1A1	P564	9.74649e-08	0.93 (0.03)	-1.88938e-07	0.93 (0.03)	1.95253e-07	0.92 (0.03)	1.98398e-06
UGT1A7	P751	5.32268e-05	0.97 (0.01)	3.88407e-05	0.97 (0.01)	3.4598e-06	0.92 (0.04)	0.00036729
UNG	P170	2.76787e-07	0.07 (0.03)	5.8798e-07	0.05 (0.03)	4.64292e-07	0.06 (0.04)	-1.74935e-06
USP29	E274	0.000179955	0.94 (0.03)	0.00013198	0.93 (0.04)	4.49554e-06	0.82 (0.07)	0.00124424
USP29	P205	4.85257e-06	0.86 (0.03)	4.57669e-06	0.83 (0.04)	2.35806e-06	0.79 (0.09)	1.76362e-05
USP29	P282	1.00644e-05	0.94 (0.01)	5.95953e-06	0.92 (0.02)	2.66923e-06	0.92 (0.02)	7.05795e-05
VAMP8	E7	0.000108774	0.63 (0.11)	0.000112947	0.42 (0.12)	0.000126285	0.63 (0.11)	1.15282e-05
VAMP8	P114	0.00441924	0.39 (0.19)	0.00420684	0.05 (0.03)	0.00569051	0.14 (0.06)	0.000267866
VAMP8	P241	0.00130417	0.56 (0.17)	0.000868214	0.41 (0.09)	7.21686e-05	0.19 (0.05)	0.00969112
VAV1	E9	0.00944597	0.59 (0.17)	0.0068683	0.02 (0)	0.0127698	0.92 (0.04)	0.0107999
VAV1	P317	0.00429133	0.72 (0.12)	0.00329985	0.21 (0.09)	0.00558459	0.91 (0.04)	0.00470746
VAV2	E58	3.62395e-05	0.05 (0.03)	1.28773e-05	0.03 (0.01)	7.46224e-05	0.05 (0.02)	2.78727e-06
VAV2	P1182	1.2079e-05	0.06 (0.03)	1.95571e-05	0.05 (0.02)	4.35662e-06	0.05 (0.04)	2.35895e-06
VEGFB	P658	1.91532e-06	0.05 (0.02)	3.49065e-06	0.07 (0.05)	6.26017e-07	0.06 (0.03)	-5.88889e-07
VIM	P343	2.50584e-05	0.03 (0.01)	2.73908e-05	0.02 (0.01)	1.10371e-05	0.1 (0.08)	7.15336e-05
VIM	P811	6.04392e-06	0.03 (0.01)	8.67309e-06	0.02 (0.01)	2.26276e-06	0.04 (0.02)	6.73571e-06
WEE1	P924	5.57603e-05	0.9 (0.05)	4.2239e-06	0.94 (0.02)	5.91199e-05	0.82 (0.07)	0.000348268
WNT1	E157	2.44698e-05	0.11 (0.05)	3.94005e-05	0.09 (0.05)	9.74799e-06	0.2 (0.14)	3.63817e-06
WNT1	P79	3.37313e-05	0.17 (0.06)	3.04733e-06	0.12 (0.03)	7.20239e-05	0.29 (0.1)	4.82523e-05
WNT10B	P823	0.00157454	0.52 (0.14)	0.00117501	0.15 (0.09)	0.00200616	0.74 (0.09)	0.00213865
WNT10B	P993	4.23457e-05	0.12 (0.05)	5.80967e-05	0.07 (0.04)	2.86659e-05	0.16 (0.06)	9.17114e-06
WNT2	P217	2.06333e-06	0.12 (0.05)	1.5616e-08	0.09 (0.03)	3.51823e-06	0.22 (0.21)	7.27893e-06
WNT2B	P1185	6.39605e-06	0.11 (0.05)	1.02038e-05	0.09 (0.07)	2.59156e-06	0.17 (0.08)	2.15556e-06
WNT2B	P1195	1.02883e-05	0.04 (0.01)	1.58237e-05	0.03 (0.01)	3.75062e-06	0.05 (0.02)	7.12244e-06
WNT5A	E43	9.45091e-07	0.08 (0.04)	2.16382e-07	0.07 (0.04)	2.00973e-06	0.12 (0.05)	4.80159e-07
WNT5A	P655	6.70024e-07	0.04 (0.04)	5.23374e-07	0.04 (0.02)	2.45211e-08	0.03 (0.01)	4.12785e-06
WNT8B	E487	7.82241e-05	0.85 (0.04)	3.9324e-05	0.88 (0.04)	5.64181e-06	0.69 (0.08)	0.000639874
WNT8B	P216	3.00429e-07	0.94 (0.01)	3.30662e-07	0.95 (0.02)	2.88526e-07	0.95 (0.01)	7.38961e-07
WRN	E57	5.13321e-07	0.12 (0.05)	4.83819e-07	0.13 (0.07)	1.45772e-07	0.17 (0.08)	2.05087e-06
WRN	P969	4.79271e-05	0.87 (0.14)	2.55234e-05	0.95 (0.02)	2.32461e-05	0.85 (0.05)	0.000307431
WT1	E32	7.11836e-05	0.07 (0.06)	6.99263e-05	0.03 (0.01)	7.94457e-05	0.13 (0.09)	4.14525e-05
WT1	P853	1.03618e-06	0.1 (0.08)	3.79562e-07	0.07 (0.06)	1.38731e-06	0.3 (0.22)	2.34257e-06
XPC	P226	1.69454e-06	0.86 (0.05)	3.36852e-07	0.85 (0.03)	3.90959e-06	0.84 (0.06)	-7.70563e-07
XRCC1	P681	0.00242725	0.94 (0.03)	0.00168818	0.93 (0.02)	3.35444e-05	0.34 (0.15)	0.0178471
XRCC2	P1077	0.00234785	0.95 (0.03)	0.00161309	0.96 (0.02)	4.20436e-05	0.74 (0.08)	0.0174223
			Solid tissues (n=113)		Blood (n=85)		Placenta (n=19)
GENE	CpG	Mean decrease in accuracy	Mean (sd)	Decrease in accuracy	Mean (sd)	Decrease in accuracy	Mean (sd)	Decrease in accuracy
YES1	P216	4.95917e-06	0.05 (0.03)	6.30394e-06	0.04 (0.03)	3.98784e-06	0.09 (0.06)	1.84444e-06
YES1	P600	5.60096e-05	0.05 (0.06)	9.11638e-05	0.03 (0.02)	1.63114e-05	0.05 (0.01)	3.07188e-05
ZAP70	P220	0.00106195	0.78 (0.06)	0.000695479	0.56 (0.08)	0.00151765	0.9 (0.03)	0.00131319
ZIM2	E110	3.65793e-07	0.63 (0.07)	9.14663e-07	0.6 (0.05)	1.4697e-06	0.6 (0.09)	-7.19841e-06
ZIM2	P22	4.37322e-05	0.69 (0.09)	3.5371e-06	0.6 (0.04)	0.000104934	0.71 (0.07)	6.80902e-06
ZIM3	E203	1.16411e-06	0.96 (0.02)	9.86616e-07	0.96 (0.01)	1.50193e-06	0.95 (0.02)	5.87302e-08
ZIM3	P451	1.46509e-05	0.96 (0.02)	4.71547e-07	0.96 (0.02)	4.28913e-07	0.93 (0.02)	0.000163621
ZIM3	P718	0.000132293	0.94 (0.04)	2.77648e-05	0.95 (0.02)	2.76561e-05	0.7 (0.12)	0.00128027
ZMYND10	E77	5.77896e-06	0.13 (0.06)	5.35304e-06	0.07 (0.03)	8.4733e-06	0.13 (0.09)	-3.98102e-06
ZMYND10	P329	2.4752e-05	0.32 (0.15)	7.86672e-07	0.15 (0.06)	6.21051e-05	0.27 (0.14)	-1.51436e-06
ZNF215	P129	-5.05536e-08	0.09 (0.04)	2.30249e-07	0.1 (0.06)	1.85408e-07	0.11 (0.06)	-2.80007e-06
ZNF215	P71	3.5452e-06	0.33 (0.12)	2.21417e-07	0.31 (0.13)	7.34025e-06	0.49 (0.14)	6.18175e-06
ZNF264	E48	5.50349e-07	0.09 (0.03)	4.2624e-07	0.12 (0.07)	5.06861e-08	0.07 (0.04)	1.16081e-06
ZNF264	P397	1.65067e-06	0.58 (0.13)	2.82883e-06	0.67 (0.14)	3.75166e-07	0.74 (0.12)	-6.51443e-07
ZNFN1A1	E102	6.32634e-05	0.85 (0.04)	2.58524e-05	0.92 (0.03)	8.8199e-05	0.81 (0.04)	0.000181864
ZNFN1A1	P179	5.42588e-06	0.97 (0.01)	4.94384e-06	0.97 (0.01)	4.83346e-06	0.98 (0.01)	9.71407e-06
ZP3	E90	2.11203e-05	0.07 (0.03)	2.37147e-05	0.04 (0.02)	2.30552e-05	0.05 (0.03)	-5.05173e-06
ZP3	P220	4.51569e-05	0.86 (0.05)	-1.92517e-07	0.9 (0.02)	2.23065e-05	0.73 (0.08)	0.000446293
